# Supplementary material for: Histone H3 clipping is a novel signature of human neutrophil extracellular traps
Source: eLife journal article supplement (doi:10.7554/elife.68283), 2022-10-25
Supplement: fig2-data1 [file elife-68283-fig2-data1-v2.zip]

6hr 20.10.15

$\alpha$  H4 - C

22.10.15

71

111  
111  
111  
111  
111  
111  
111

111  
111  
111  
111  
111  
111  
111

111  
111  
111  
111  
111  
111  
111
