# Supplementary material for: Histone H3 clipping is a novel signature of human neutrophil extracellular traps
Source: eLife journal article supplement (doi:10.7554/elife.68283), 2022-10-25
Supplement: fig2-figsupp2-data1 [file Figure 2-figure supplement 2-Source data 2-mass spectrometry report.xls]

## Sheet: results
order No 16_02
	sample	status	score	accession no	protein name	MW	pI	sequence coverage	no of peptides
	1	ident	99	H33_HUMAN	P84243|H33_HUMAN Histone H3.3 OS=Homo sapiens GN=H3F3A PE=1 SV=2	15318	11.27	25.7	8
	2	ident	133	H33_HUMAN	P84243|H33_HUMAN Histone H3.3 OS=Homo sapiens GN=H3F3A PE=1 SV=2	15318	11.27	25	7
	2	candidate	78	H2AZ_HUMAN	P0C0S5|H2AZ_HUMAN Histone H2A.Z OS=Homo sapiens GN=H2AFZ PE=1 SV=2	13545	10.58	14.1	4
	3	ident	140	H33_HUMAN	P84243|H33_HUMAN Histone H3.3 OS=Homo sapiens GN=H3F3A PE=1 SV=2	15318	11.27	22.1	7
	4	ident	193	H33_HUMAN	P84243|H33_HUMAN Histone H3.3 OS=Homo sapiens GN=H3F3A PE=1 SV=2	15318	11.27	27.2	8
	5	ident	198	H33_HUMAN	P84243|H33_HUMAN Histone H3.3 OS=Homo sapiens GN=H3F3A PE=1 SV=2	15318	11.27	27.2	9
	6	ident	317	S10A9_HUMAN	P06702|S10A9_HUMAN Protein S100-A9 OS=Homo sapiens GN=S100A9 PE=1 SV=1	13234	5.71	70.2	10
	7	ident	486	S10A9_HUMAN	P06702|S10A9_HUMAN Protein S100-A9 OS=Homo sapiens GN=S100A9 PE=1 SV=1	13234	5.71	81.6	15
	8	ident	483	S10A9_HUMAN	P06702|S10A9_HUMAN Protein S100-A9 OS=Homo sapiens GN=S100A9 PE=1 SV=1	13234	5.71	82.5	14
	9	candidate	57	S10AB_HUMAN	P31949|S10AB_HUMAN Protein S100-A11 OS=Homo sapiens GN=S100A11 PE=1 SV=2	11733	6.56	9.5	2
	10	ident	344	S10AB_HUMAN	P31949|S10AB_HUMAN Protein S100-A11 OS=Homo sapiens GN=S100A11 PE=1 SV=2	11733	6.56	45.7	8
	11	ident	343	S10A8_HUMAN	P05109|S10A8_HUMAN Protein S100-A8 OS=Homo sapiens GN=S100A8 PE=1 SV=1	10828	6.51	37.6	9
	12	ident	140	S10A8_HUMAN	P05109|S10A8_HUMAN Protein S100-A8 OS=Homo sapiens GN=S100A8 PE=1 SV=1	10828	6.51	25.8	5
	13	ident	136	S100P_HUMAN	P25815|S100P_HUMAN Protein S100-P OS=Homo sapiens GN=S100P PE=1 SV=2	10393	4.75	35.8	6
	14	candidate	48	S10A6_HUMAN	P06703|S10A6_HUMAN Protein S100-A6 OS=Homo sapiens GN=S100A6 PE=1 SV=1	10173	5.33	16.7	3
