# Supplementary material for: Histone H3 clipping is a novel signature of human neutrophil extracellular traps
Source: eLife. 2022 Oct 25;11:e68283. doi: 10.7554/eLife.68283 (PMC9665850; doi:10.7554/eLife.68283)
Supplement: Figure 1—figure supplement 2—source data 1. [file elife-68283-fig1-figsupp2-data1.xlsx]

## Sheet: Fig1-figSupp2
blue values excluded as appears PMA was not correctly pipetted - slow and minimal ROS burst in contrast to other replicates
Representative exp. See beyond column 103 for Exp2 and 3
Exp1
Time in min	NS + AEBSF 1 mM			PMA + AEBSF 1 mM			NS + AEBSF 150 uM			PMA + AEBSF 150 uM			NS + PBS			PMA + PBS
0	60	78	54	2044	76	2024	48	44	40	444	2032	1094	86	68	66	204	426	234
5.2	60	60	66	5102	116	4396	36	46	24	3112	6570	5028	44	40	50	6888	9136	5648
7.8	50	60	58	7684	154	6542	26	42	36	5238	8740	7938	44	28	34	13164	15133	10760
10.4	62	62	66	9666	194	8228	48	30	38	7512	10570	10234	42	20	44	17269	18943	15065
13	58	56	66	10872	248	9516	22	28	40	9662	12740	12428	34	28	34	19287	20736	17469
15.6	40	62	44	11550	296	10490	28	20	36	11774	14751	14231	38	34	32	20110	21010	19141
18.2	38	70	62	11970	348	10576	30	48	38	13788	16357	16359	32	18	28	20064	20370	19865
20.8	46	58	60	12108	422	10918	26	28	34	15221	17483	17795	36	26	34	19587	19399	19903
23.4	68	50	54	11986	412	11032	24	32	36	16989	17999	19049	28	26	30	18715	18279	19545
26	60	58	72	11780	468	10816	22	30	44	17881	18447	19935	40	26	34	17477	17215	18801
28.6	58	74	68	11232	548	10338	22	16	44	18527	18757	20242	40	22	36	16395	15567	18027
31.2	72	62	70	10876	626	9732	30	30	54	19047	18357	20414	32	32	34	15405	14607	16683
33.8	74	46	74	10680	658	9596	22	22	42	18999	17935	20342	34	30	38	14064	13518	16025
36.4	66	54	78	10032	620	8866	22	30	46	19067	17697	19781	34	36	28	13074	12642	14693
39	90	54	76	9558	624	8474	26	20	40	18731	17001	19403	44	18	28	12132	11642	13710
41.6	76	56	80	8984	556	7944	22	36	44	17663	16673	18747	38	28	24	11432	10668	12550
44.2	66	74	68	8228	614	7012	22	24	32	17471	15571	18391	32	32	26	10440	10028	12054
46.8	70	78	78	7506	662	6582	34	26	30	16737	15125	17243	26	16	24	9690	9374	10708
49.4	68	64	84	6964	580	5840	20	22	34	16339	14233	16079	30	18	24	9092	8772	10152
52	80	82	84	6342	590	5080	30	30	38	15251	13408	15611	32	20	26	8460	8184	9358
54.6	98	76	104	5812	558	4676	20	32	46	14337	12646	14227	40	30	22	8152	7694	8826
57.2	84	72	84	5142	538	4202	12	28	36	13750	11920	13264	40	28	24	7720	7534	8444
59.8	80	84	98	4608	526	3582	20	28	42	12500	11258	12566	44	22	24	7126	6972	7904
62.4	82	92	92	4080	500	3168	26	22	28	12046	10194	11576	26	22	42	7044	6624	7522
65	96	82	90	3640	472	2778	26	32	32	11316	9454	10724	24	26	36	6484	6442	7182
67.6	78	64	76	3174	446	2294	24	30	22	10524	8902	10102	30	30	20	6224	6132	6690
70.2	78	68	86	2694	394	2010	16	18	36	9844	8536	9548	32	24	24	6006	5872	6408
72.8	80	78	100	2256	374	1638	26	12	24	8938	7794	9026	30	24	16	5960	5738	6318
75.4	78	82	90	1974	346	1468	20	26	30	8446	7416	8372	24	24	20	5702	5784	6056
78	72	70	100	1592	334	1282	26	26	28	8044	7350	7922	30	16	26	5420	5544	5836
80.6	60	64	94	1434	274	1002	20	24	36	7674	6840	7408	32	28	32	5268	5254	5624
83.2	50	76	72	1186	294	848	24	24	14	7444	6432	6974	30	30	16	5232	5296	5436
85.8	68	72	56	1074	228	698	28	12	30	6728	6154	6810	24	24	34	5072	5348	5462
88.4	56	74	62	810	262	606	28	18	20	6420	5828	6230	22	16	22	4920	4932	5348
91	70	62	72	736	168	520	18	22	34	6010	5712	6272	32	20	20	4904	4952	5044
93.6	66	52	50	614	198	428	26	30	34	5804	5514	5848	24	16	30	4862	4896	5114
96.2	52	58	46	528	146	350	34	24	28	5596	5272	5706	30	24	26	4608	4766	5004
98.8	38	46	42	442	128	278	26	28	30	5582	5138	5494	38	24	26	4508	4662	4810
101.4	46	52	54	418	138	272	14	22	32	5280	5046	5268	32	22	22	4472	4564	4748
104	40	38	48	324	144	188	16	18	28	5050	4792	5234	32	28	22	4356	4576	4588
106.6	44	48	38	286	128	168	16	34	24	4838	4788	4822	28	20	20	4238	4454	4760
109.2	30	50	40	246	96	146	20	28	22	4776	4530	5004	26	26	18	4244	4552	4370
111.8	40	36	44	222	76	124	24	16	36	4670	4496	4862	28	22	26	4102	4154	4442
114.4	40	26	38	194	80	100	22	16	26	4576	4394	4750	26	16	22	4104	4304	4398
117	24	38	40	154	58	96	12	16	24	4444	4188	4578	20	16	22	3918	4076	4432
119.6	34	32	36	134	86	92	24	16	32	4230	4334	4436	30	16	24	3968	4094	4052
122.2	32	30	40	102	82	70	16	22	30	4198	4096	4418	36	18	16	3892	3894	4110
124.8	30	20	26	110	48	76	16	10	32	4098	4112	4210	30	28	8	3852	3840	4036
127.4	24	24	38	96	60	64	14	32	32	4120	4098	4208	26	12	22	3714	3734	4060
130	18	28	18	78	58	54	24	14	26	4024	4008	4056	28	24	14	3530	3778	3816
132.6	24	22	22	82	50	50	18	12	22	3900	3896	3896	30	20	26	3430	3618	3832
135.2	16	22	32	52	56	50	20	16	34	3806	3820	3926	22	16	20	3518	3648	3678
137.8	18	20	22	56	60	58	20	18	28	3762	3854	3880	40	14	24	3434	3650	3692
140.4	24	20	24	50	38	38	16	16	24	3688	3730	3768	16	14	16	3420	3482	3694
143	20	22	22	54	30	42	14	18	22	3626	3684	3762	28	24	20	3360	3358	3530
145.6	26	24	20	48	44	34	16	22	32	3800	3544	3588	20	18	14	3194	3356	3506
148.2	30	24	22	46	54	42	18	22	30	3466	3512	3540	32	22	18	3132	3348	3300
150.8	28	18	18	52	60	40	24	26	20	3460	3382	3472	26	24	18	3056	3204	3296
153.4	28	18	20	36	42	38	18	18	32	3368	3402	3542	28	16	16	2994	3150	3270
156	24	22	28	38	50	40	22	26	24	3446	3236	3366	30	10	14	3082	3164	3236
158.6	28	20	22	28	36	32	16	22	28	3206	3304	3368	16	32	22	3018	2996	3144
161.2	22	18	22	34	42	28	28	18	26	3230	3190	3310	18	22	24	2888	2990	3182
163.8	34	20	18	30	44	36	20	14	22	3338	3136	3178	26	24	18	2780	2880	2982
166.4	22	14	20	30	46	38	24	22	28	3220	3124	3242	22	12	28	2762	2824	2928
169	24	30	26	30	46	34	38	18	28	3076	3018	3174	30	28	16	2658	2772	2954
171.6	24	20	20	28	50	20	32	20	20	3040	3092	3156	28	26	22	2766	2658	2852
174.2	14	22	14	34	42	22	32	22	30	2940	2902	3082	30	16	22	2634	2690	2704
176.8	24	16	18	32	46	32	40	22	34	2860	2940	2966	30	20	20	2566	2598	2662
179.4	22	20	16	30	36	28	26	14	36	3008	2960	2944	18	24	24	2530	2592	2612
182	22	20	18	30	40	36	26	8	22	2818	2848	2908	18	22	20	2436	2434	2558
184.6	22	16	22	30	36	30	30	30	34	2732	2714	2794	16	14	16	2364	2368	2398
187.2	18	22	14	40	44	30	38	22	36	2808	2758	2856	24	22	16	2318	2270	2340
189.8	16	24	16	36	40	36	26	26	34	2662	2618	2750	32	24	26	2210	2216	2250
192.4	20	18	22	34	40	32	32	24	34	2604	2684	2618	28	22	24	2074	2106	2216
195	30	28	22	30	46	26	36	30	36	2560	2570	2610	22	28	34	2074	2086	2184
197.6	22	16	16	30	46	30	30	22	28	2584	2488	2514	18	20	28	2064	2024	2142
200.2	16	26	28	26	30	48	36	32	26	2538	2506	2542	26	26	26	2010	1984	1982
202.8	20	24	24	36	46	30	50	24	22	2558	2492	2440	32	22	24	1976	1898	1906
205.4	20	22	20	32	30	28	32	18	30	2568	2436	2422	28	26	44	1746	1794	1758
208	20	20	32	36	34	30	36	28	26	2366	2384	2372	34	22	20	1736	1698	1648
210.6	26	28	18	46	40	32	36	18	32	2328	2310	2308	26	32	42	1730	1624	1682
213.2	22	32	20	36	48	36	30	22	24	2298	2318	2284	40	36	38	1624	1556	1544
215.8	24	20	24	38	40	30	38	22	26	2276	2308	2242	40	34	28	1608	1480	1480
218.4	24	22	26	36	42	46	36	20	16	2210	2256	2212	34	18	26	1504	1380	1380
221	14	30	28	44	38	30	38	24	32	2228	2200	2150	28	36	32	1440	1418	1308
223.6	22	26	20	42	48	36	28	30	38	2148	2196	2068	32	22	30	1394	1202	1272
226.2	24	26	22	26	44	26	44	18	30	2148	2144	2024	24	28	30	1282	1212	1062
228.8	26	26	12	38	50	22	38	28	32	2098	2090	2004	32	30	34	1246	1120	1150
231.4	22	34	28	30	36	38	48	22	46	1990	2062	1918	40	30	40	1134	1130	1030
234	28	28	28	46	40	42	38	24	32	1938	2038	1912	42	40	32	1088	1006	950
236.6	28	28	22	40	38	32	38	36	34	1966	2014	1762	34	34	32	1022	922	876
239.2	30	30	30	38	24	38	34	40	28	1918	1908	1798	32	24	32	998	888	812
241.8	28	34	26	38	34	32	36	34	34	1814	1848	1742	32	34	22	868	834	744
244.4	20	16	20	26	44	24	26	24	28	1738	1860	1626	24	38	28	866	728	730
247	6	26	26	30	32	36	22	14	28	1826	1812	1680	26	22	28	808	710	584
249.6	22	26	20	30	32	28	32	24	30	1740	1642	1560	24	32	32	706	654	646
252.2	26	20	20	36	28	36	22	22	20	1648	1674	1572	28	34	34	728	580	556
Exp2
	Unstimulated + AEBSF 1mM			PMA + AEBSF 1mM			Unstimulated + AEBSF 150 uM			PMA + AEBSF 150 uM			Unstimulated + PBS			PMA + PBS
0	706	802	688	58	58	66	938	942	946	128	220	218	436	552	186	794	764	594
5.2	38	30	26	80	52	58	32	36	44	430	734	600	28	36	32	2202	2212	1970
7.8	30	32	30	110	70	66	28	36	36	1064	1834	1220	28	22	32	3756	4216	3582
10.4	26	36	28	174	68	96	26	34	42	2298	3456	2010	24	30	30	5328	5740	5276
13	18	24	32	276	76	110	26	32	50	4384	5718	3466	36	28	42	6618	7436	7102
15.6	18	22	22	306	84	112	26	34	44	7178	8378	5654	28	26	36	7464	8716	8826
18.2	22	24	20	422	60	126	28	22	48	10198	11110	8186	28	26	34	8500	9256	10092
20.8	26	16	26	506	78	156	28	28	54	13312	13728	11200	26	28	26	8740	9316	10736
23.4	28	36	36	588	106	156	30	32	44	15779	15697	14283	30	22	30	9184	9674	11170
26	26	18	28	626	140	188	32	44	44	17693	17115	17153	32	24	44	9224	9382	11290
28.6	32	24	32	752	90	168	30	24	40	19067	17827	19315	32	28	32	9528	9216	10978
31.2	22	32	30	786	106	176	34	32	54	18785	17881	21060	32	24	24	9064	9348	10552
33.8	20	32	28	812	106	166	24	50	46	18683	17621	22228	26	40	42	8988	9134	10124
36.4	26	18	28	812	116	164	30	34	38	18003	16851	22616	26	28	32	8942	8960	9828
39	10	16	34	802	118	150	28	32	46	17025	15979	22550	22	16	28	8604	8596	9438
41.6	12	20	32	788	86	166	16	26	30	15995	15043	21926	24	26	26	8632	8510	9034
44.2	30	28	34	764	94	184	38	40	36	14955	13934	20958	24	24	20	8108	8384	8510
46.8	22	24	30	692	98	140	26	28	34	14141	12900	19769	32	24	30	8224	8046	8050
49.4	20	30	38	684	90	138	22	34	36	13100	11810	18583	32	28	26	8018	7496	7548
52	20	22	34	650	86	130	34	30	34	12236	11092	17227	26	24	30	7666	7208	7314
54.6	18	18	30	612	68	106	32	30	50	11222	10260	16053	26	20	48	7264	6954	6788
57.2	18	28	30	514	68	96	26	38	34	10292	9322	14801	32	32	28	7112	6484	6422
59.8	24	32	32	542	88	86	36	34	36	9302	8662	13490	18	28	26	6554	6262	6094
62.4	28	22	28	402	64	94	28	30	40	8796	8022	12230	22	34	24	6400	5978	5714
65	28	36	42	450	68	90	42	24	50	8044	7374	11280	22	30	36	5866	5448	5448
67.6	20	16	34	360	56	70	26	28	40	7474	6754	10204	22	30	50	5666	5270	5010
70.2	26	26	26	296	58	70	34	18	40	6862	6396	9366	28	20	14	5372	4948	4718
72.8	22	14	26	278	56	68	18	28	36	6192	5772	8440	20	30	22	5216	4590	4552
75.4	16	14	16	258	52	62	28	22	30	5818	5506	7854	16	26	18	4578	4462	4380
78	20	18	20	224	38	72	24	30	40	5472	5006	7012	28	30	38	4538	4234	4110
80.6	18	16	16	228	42	60	26	22	26	5084	4714	6578	30	24	22	4254	4056	3978
83.2	14	16	26	208	46	60	22	18	30	4680	4376	6056	30	26	22	3934	3876	3626
85.8	12	24	20	178	44	48	28	22	34	4514	4196	5592	28	20	32	3766	3688	3644
88.4	16	24	12	170	30	56	20	34	32	4228	3880	5166	12	22	20	3574	3502	3438
91	28	16	20	122	38	48	16	12	20	3980	3824	4774	22	22	22	3472	3360	3302
93.6	12	28	28	124	34	48	14	20	28	3786	3608	4526	18	22	18	3298	3302	3172
96.2	16	16	20	102	46	46	22	34	26	3546	3392	4232	18	28	24	3242	3240	3002
98.8	18	22	18	92	32	50	26	30	28	3382	3302	4048	12	28	26	3130	3082	3002
101.4	22	16	26	82	40	38	26	22	22	3114	3060	3780	26	20	24	3084	2972	2990
104	12	18	10	80	34	30	24	20	20	3118	3012	3672	26	16	20	2898	2826	2776
106.6	20	18	14	70	46	46	30	32	32	3040	2988	3452	26	22	22	2726	2664	2738
109.2	18	18	24	80	30	34	28	16	20	2830	2918	3280	26	18	22	2732	2654	2708
111.8	14	16	24	54	28	38	20	26	30	2892	2730	3112	24	14	20	2576	2530	2562
114.4	22	22	20	64	26	42	28	22	20	2756	2698	3036	22	18	18	2508	2418	2470
117	8	16	14	62	32	38	30	26	28	2542	2500	2916	18	22	20	2344	2502	2334
119.6	10	18	16	58	24	30	30	28	26	2566	2520	2744	34	22	24	2308	2412	2294
122.2	16	18	16	40	20	20	16	16	16	2434	2454	2756	18	18	18	2290	2286	2216
124.8	14	14	6	52	22	22	18	14	32	2488	2412	2690	18	20	20	2186	2310	2266
127.4	16	20	12	44	32	28	18	22	26	2282	2334	2614	20	20	26	2160	2132	2088
130	8	14	12	42	40	28	24	32	24	2358	2356	2592	18	22	10	2082	2004	2004
132.6	18	16	14	44	16	40	18	18	28	2402	2328	2420	26	20	18	2016	1942	2098
135.2	16	14	16	38	28	22	20	22	22	2196	2212	2318	20	20	18	1958	1956	1946
137.8	16	12	12	36	28	20	10	22	16	2268	2226	2310	20	24	16	1944	2000	1906
140.4	18	18	12	44	20	20	24	24	28	2092	2264	2338	20	18	14	1816	1884	1800
143	16	20	22	32	24	32	14	34	34	2096	2146	2250	26	10	22	1810	1790	1800
145.6	24	20	16	46	28	34	32	30	34	2208	2088	2160	12	20	26	1710	1852	1716
148.2	14	20	16	42	30	22	18	30	26	2040	1972	2092	18	24	10	1638	1688	1678
150.8	14	16	20	22	22	30	16	30	22	2088	2006	2118	18	20	26	1628	1700	1636
153.4	16	12	12	32	22	24	20	24	20	2068	2048	2098	16	20	10	1584	1606	1502
156	10	16	12	30	34	20	18	30	14	1934	2086	2050	34	20	16	1512	1534	1394
158.6	10	18	16	56	20	30	34	16	20	2010	1950	1958	18	18	24	1454	1508	1394
161.2	20	20	18	50	26	28	22	12	28	1914	1932	1926	10	20	10	1340	1394	1282
163.8	10	12	18	32	22	22	20	18	24	1906	1902	1904	18	14	12	1378	1426	1204
166.4	10	14	12	38	32	20	12	18	30	1916	1818	1878	16	20	22	1286	1258	1166
169	14	12	14	38	18	26	12	22	22	1870	1890	1832	18	20	12	1206	1172	1042
171.6	10	16	12	28	26	38	18	24	24	1856	1736	1784	20	22	14	1180	1156	912
174.2	16	12	10	32	22	22	18	22	34	1754	1778	1824	18	18	24	1076	996	898
176.8	18	20	12	20	24	14	12	12	24	1750	1762	1708	16	20	10	990	898	790
179.4	20	12	26	38	30	26	12	16	20	1724	1748	1668	14	22	12	920	810	736
182	14	12	18	38	20	16	12	22	16	1682	1736	1652	24	22	16	808	760	704
184.6	16	12	14	40	30	20	18	18	32	1672	1672	1624	20	14	24	814	688	626
187.2	8	24	22	42	22	18	28	20	22	1674	1568	1650	24	22	18	686	650	584
189.8	16	16	12	36	20	18	18	20	28	1716	1574	1528	22	24	24	624	608	520
192.4	34	20	14	44	24	28	16	26	28	1654	1596	1534	34	26	32	624	548	436
195	18	26	20	44	28	30	28	22	34	1668	1638	1428	36	22	32	546	520	496
197.6	22	20	30	46	28	24	26	26	40	1574	1544	1550	40	22	28	466	544	426
200.2	26	14	18	50	36	30	18	40	22	1548	1586	1450	22	26	34	438	502	392
202.8	24	20	20	42	40	44	20	36	32	1560	1636	1320	26	32	26	416	442	346
205.4	22	38	14	58	28	46	30	26	28	1468	1526	1272	32	30	26	422	398	304
208	22	28	22	44	32	38	30	26	24	1514	1410	1272	38	36	24	392	380	316
210.6	20	22	14	50	22	36	26	32	26	1408	1442	1282	28	34	56	356	350	318
213.2	12	18	20	38	26	22	22	24	22	1418	1388	1220	20	10	14	292	284	250
215.8	8	14	20	34	16	12	24	24	24	1310	1292	1164	10	20	20	316	294	236
218.4	16	12	8	46	20	14	16	20	30	1312	1312	1166	20	22	18	250	252	208
221	8	12	8	48	16	20	22	16	16	1268	1242	1074	20	24	20	250	218	196
223.6	20	20	6	40	26	20	18	16	12	1288	1242	1040	12	16	22	224	248	188
226.2	22	6	14	36	20	18	16	20	16	1218	1210	1026	30	24	20	224	224	174
228.8	12	14	16	46	14	14	14	14	20	1244	1186	954	18	14	16	176	182	136
231.4	18	12	18	40	24	30	14	18	20	1130	1126	960	20	18	30	184	194	110
234	10	10	16	42	20	16	12	18	18	1074	1048	896	24	26	16	182	156	128
236.6	12	10	16	38	18	22	20	20	22	1098	980	788	24	18	26	152	144	110
239.2	12	20	10	54	18	24	20	14	16	1072	932	786	18	18	20	138	128	132
241.8	12	16	12	48	20	24	16	18	26	988	890	854	20	28	12	132	130	80
244.4	8	20	14	44	14	24	20	18	12	956	808	690	16	30	22	122	106	92
247	8	16	8	36	14	16	16	18	20	824	820	636	22	28	14	108	90	96
249.6	20	34	22	46	28	30	30	30	28	870	682	656	36	24	34	138	112	94
252.2	26	22	32	60	40	42	36	26	48	812	690	644	42	40	32	126	112	86
Exp 3
	NS + AEBSF 1 mM			PMA + AEBSF 1 mM			NS + AEBSF 150 mM			PMA + AEBSF 150 mM			NS + VC			PMA + VC
0	46	50	62	222	268	90	64	82	82	362	200	204	66	64	56	110	66	68
2.43	38	24	36	1772	2692	366	44	70	58	1926	1066	968	56	46	50	1632	1020	970
4.86	26	34	40	4256	6180	854	42	54	52	4038	2390	2066	32	44	40	4914	3692	3292
7.29	18	26	36	6822	9264	1468	44	42	68	6646	4056	3398	32	38	44	9458	6964	6250
9.72	20	34	34	9368	11242	1984	38	52	58	9580	6220	5146	42	36	30	14295	11380	9812
12.15	20	26	32	11292	12786	2458	46	60	44	12664	8678	7456	36	34	54	18271	16367	13404
14.58	26	32	52	13980	14337	3038	36	64	60	16531	11736	9640	28	36	38	21042	20138	17361
17.01	18	34	38	16819	15905	3682	46	58	66	19981	15431	12046	46	36	38	23272	22666	20968
19.44	30	32	44	19959	17507	4080	34	58	68	23888	19445	14757	24	40	46	24893	24238	23352
21.87	30	36	44	23820	19079	4698	40	50	68	27605	23106	17181	28	34	60	26391	25347	25215
24.3	28	32	54	27511	21542	5182	44	48	62	30946	26983	19895	40	22	56	27061	25955	27277
26.73	30	36	44	31594	23046	5610	42	68	68	34293	30092	22320	28	46	52	28143	26459	27849
29.16	36	26	48	35656	24745	6092	56	44	68	36746	32901	25587	46	34	46	28113	26391	28298
31.59	30	42	72	39689	26447	6536	48	48	78	38937	35110	28073	44	48	64	28336	25941	28616
34.02	20	26	48	42839	27715	6522	40	46	68	40084	36022	30806	40	54	46	27851	25289	27849
36.45	24	22	50	46226	28838	6900	38	54	68	41098	37228	32849	30	30	50	27125	24567	27043
38.88	30	28	54	48095	29238	7024	38	50	66	41518	37951	34684	34	30	48	25767	24204	26143
41.31	32	36	46	49718	29604	6938	38	52	80	41492	37807	36940	36	36	44	24787	23260	24460
43.74	28	34	58	50806	29594	6952	32	56	84	41150	37787	38363	22	40	44	23772	22600	23656
46.17	26	42	58	51447	29176	6628	52	54	86	40096	36614	39195	38	40	44	22794	21426	22338
48.6	40	26	72	51309	28936	6648	40	68	62	38313	35702	39351	34	36	42	20994	20478	21266
51.03	32	34	58	50388	27983	6328	36	54	70	36994	34832	39807	32	44	36	19691	19621	19721
53.46	28	36	58	49406	27227	6056	26	52	70	35510	33407	39115	26	34	52	18373	18433	18143
55.89	20	34	70	47789	26085	5634	44	54	72	34193	32055	38373	38	38	44	16973	17309	17087
58.32	24	24	54	46368	25051	5328	44	66	72	32273	30348	37238	28	34	50	15827	16335	15851
60.75	24	34	48	44715	23458	4846	32	54	70	30238	29260	36262	24	38	32	14481	15401	14721
63.18	22	38	50	42843	22508	4610	28	60	70	28900	27135	34463	22	36	54	13692	14555	13770
65.61	22	20	54	40478	20656	4132	36	48	58	27623	25495	32827	32	42	32	12796	13674	12728
68.04	42	22	42	38277	19409	3734	20	50	52	26041	24104	31380	30	26	34	11688	12628	12084
70.47	30	36	52	36378	18199	3428	36	46	60	24408	22560	29688	28	20	44	11140	11964	11180
72.9	32	32	48	34259	16321	3048	46	56	60	22698	20932	27631	32	30	40	10202	11280	10638
75.33	28	24	34	32199	15193	2732	38	48	52	21524	19771	26005	28	32	30	9814	10506	10034
77.76	24	30	44	29698	13908	2418	46	52	66	20064	17881	24146	30	24	38	8924	10074	9334
80.19	32	24	40	27833	12488	2120	46	62	56	18637	17101	22886	24	30	34	8580	9466	8954
82.62	30	32	40	25389	11200	1886	38	62	56	17549	15713	21292	20	30	44	8200	8904	8710
85.05	22	28	26	23584	9936	1714	32	40	58	16519	14745	19913	20	40	32	7692	8434	8206
87.48	28	28	42	21302	9144	1460	24	50	50	15147	13658	18551	28	26	32	7380	8060	7844
89.91	32	38	30	19913	8126	1258	30	44	52	14415	12768	17433	28	30	26	7228	7748	7428
92.34	22	26	42	18291	6974	1088	26	50	58	13606	12168	16317	36	38	34	6950	7600	7060
94.77	20	34	30	16615	6226	948	36	40	58	12394	11392	14939	30	26	24	6664	7176	7028
97.2	34	16	36	15091	5446	860	34	34	52	11906	10674	14157	28	28	30	6436	7188	6566
99.63	28	26	34	13750	4884	784	30	40	52	11096	10050	13162	34	32	26	6332	6604	6500
102.06	26	26	40	12268	4244	694	36	38	50	10210	9436	12458	32	36	34	5960	6540	6366
104.49	26	28	28	11212	3634	592	30	48	44	9710	9008	11660	26	14	30	5710	6418	5994
106.92	30	14	42	10090	3256	528	40	42	46	9178	8636	10936	34	24	24	5772	6078	6068
109.35	28	22	30	8754	2854	496	26	34	44	8574	7976	10340	40	24	28	5498	5944	5820
111.78	18	22	30	8008	2468	386	24	44	42	8240	7692	9712	22	40	28	5250	5688	5666
114.21	18	24	24	7118	2066	406	40	38	38	8132	7332	9080	26	20	24	5176	5804	5484
116.64	26	24	24	6514	1812	358	26	56	36	7536	7304	8662	28	28	20	5054	5582	5244
119.07	24	28	22	5766	1568	352	32	34	28	7220	6888	8184	34	28	26	5088	5518	5288
121.5	22	30	26	5218	1328	304	36	40	42	7102	6866	7898	36	20	36	4782	5320	5112
123.93	22	26	20	4740	1118	298	30	34	38	6760	6432	7412	24	26	38	4730	5242	5170
126.36	26	20	28	4144	1012	308	28	50	26	6584	6284	7188	26	28	16	4736	5116	5010
128.79	26	16	26	3806	898	278	30	36	36	6328	6134	6994	36	22	20	4500	5032	4904
131.22	30	24	20	3362	798	258	28	40	30	5972	5812	6876	30	32	20	4384	4842	4734
133.65	16	16	24	3174	704	248	32	34	30	5916	5804	6558	18	42	26	4200	4886	4664
136.08	26	16	26	2918	624	218	26	34	28	5658	5714	6346	36	24	34	4248	4562	4426
138.51	28	22	22	2716	528	228	22	32	30	5632	5552	6174	24	28	24	4122	4498	4382
140.94	32	22	24	2382	496	208	28	30	36	5324	5288	5954	30	20	22	4068	4530	4286
143.37	20	22	20	2244	464	194	26	38	42	5304	5316	5802	22	30	24	3926	4360	4242
145.8	28	18	20	2052	406	222	32	42	38	5148	5182	5758	34	38	28	3784	4294	4150
148.23	28	26	20	1876	356	154	44	44	20	4950	5188	5504	32	36	32	3718	4224	3984
150.66	24	20	30	1780	328	214	30	48	26	4862	5122	5362	28	28	38	3608	4064	3938
153.09	18	26	22	1688	306	146	36	34	34	4780	5008	5248	22	34	22	3586	3916	3924
155.52	20	28	24	1542	274	162	30	32	26	4686	4888	5270	30	24	26	3418	3956	3892
157.95	22	22	22	1454	274	120	32	38	26	4538	4666	5104	40	42	40	3394	3832	3692
160.38	28	22	18	1388	246	128	24	46	28	4620	4810	5024	42	42	38	3312	3742	3442
162.81	12	22	28	1336	262	134	44	30	42	4470	4622	4936	36	38	24	3246	3750	3508
165.24	20	18	20	1302	236	120	20	44	26	4394	4528	4810	30	30	26	3212	3600	3374
167.67	22	14	24	1254	216	132	26	36	26	4286	4492	4588	30	32	34	2950	3452	3272
170.1	20	18	20	1152	224	114	30	36	34	4224	4404	4826	44	34	26	2974	3400	3230
172.53	26	24	32	1170	186	108	28	42	36	3976	4182	4562	34	36	42	2940	3118	3164
174.96	22	46	28	1160	188	114	24	56	26	4106	4096	4674	34	34	40	2826	3002	3040
177.39	22	16	20	1110	196	98	30	34	24	4014	4158	4448	46	32	42	2798	2914	2866
179.82	26	30	22	1054	200	114	34	32	36	4024	4152	4282	36	32	40	2690	2840	2752
182.25	16	16	22	1060	168	96	26	30	32	3818	4058	4446	44	36	40	2498	2692	2676
184.68	24	22	32	1100	156	94	32	26	32	3808	4100	4180	44	30	36	2424	2624	2486
187.11	26	18	28	1024	184	96	38	40	32	3808	3896	4248	42	48	34	2400	2504	2486
189.54	24	20	34	1052	170	102	36	40	30	3728	3938	4034	50	46	40	2238	2304	2368
191.97	16	24	34	1046	168	96	44	42	36	3720	3918	4068	38	50	34	2236	2314	2268
194.4	22	12	30	1058	162	76	30	46	38	3622	3718	4060	52	40	40	2080	2126	2174
196.83	34	32	26	1078	152	76	34	36	36	3484	3782	3968	58	50	48	2076	2132	2016
199.26	32	28	20	1100	140	78	30	48	34	3528	3732	3934	56	38	40	1954	2034	1940
201.69	30	30	26	1080	174	98	30	54	50	3406	3534	3766	60	50	48	1894	1810	1902
204.12	24	30	30	1116	170	98	40	36	32	3518	3716	3790	56	56	46	1870	1810	1738
206.55	20	30	28	1094	174	76	34	40	38	3332	3482	3670	52	46	66	1654	1730	1652
208.98	24	32	22	1146	154	66	40	32	34	3408	3514	3700	62	36	64	1600	1638	1588
211.41	30	28	24	1212	190	78	26	26	48	3312	3520	3582	38	48	44	1570	1536	1454
213.84	26	22	36	1156	174	66	36	46	42	3252	3256	3662	64	50	48	1458	1454	1374
216.27	22	30	22	1238	186	80	38	42	60	3194	3342	3460	52	48	42	1350	1346	1372
218.7	30	42	34	1280	188	70	30	36	46	3068	3340	3478	64	46	52	1320	1268	1282
221.13	22	28	30	1264	190	62	46	40	44	3124	3226	3430	54	72	50	1216	1202	1182
223.56	26	34	42	1386	190	80	36	38	32	3150	3246	3490	60	56	50	1190	1110	1186
225.99	28	36	34	1364	224	86	42	44	40	3030	3056	3196	60	58	54	1140	1028	980
228.42	28	34	32	1420	200	72	40	48	40	2858	3134	3362	66	64	66	1072	1012	1038
230.85	34	24	38	1426	242	62	44	40	36	2886	3002	3274	62	68	70	978	958	916
233.28	24	28	30	1430	220	68	58	32	48	2842	2966	3128	80	68	82	954	884	852
235.71	24	22	30	1484	218	58	54	42	50	2790	3010	3106	64	60	68	776	908	790
238.14	32	28	32	1518	234	64	44	48	44	2846	2896	3032	70	78	58	824	750	838
240.57	32	20	32	1620	276	52	30	42	34	2800	2816	3056	70	66	64	794	810	738
243	26	24	28	1630	266	60	38	44	32	2702	2840	2940	74	64	60	686	722	710
245.43	36	28	36	1694	286	66	36	38	48	2592	2712	2918	74	80	74	654	640	648
247.86	24	38	30	1740	266	52	46	32	50	2580	2724	2906	64	68	66	642	646	654
250.29	30	32	30	1760	302	66	48	52	48	2568	2762	2920	82	84	80	588	602	554
252.72	26	26	30	1804	282	60	36	42	52	2574	2672	2958	70	76	62	572	566	562
