# Supplementary material for: Histone H3 clipping is a novel signature of human neutrophil extracellular traps
Source: eLife. 2022 Oct 25;11:e68283. doi: 10.7554/eLife.68283 (PMC9665850; doi:10.7554/eLife.68283)
Supplement: Figure 1—figure supplement 3—source data 1. [file elife-68283-fig1-figsupp3-data1.xlsx]

## Sheet: Fig 1_figSupp2
Concentration of AEBSF uM	0	150	1000	Lysis buffer
exp1	6.76148	14.2937	34.7162	100
exp2	9.20376	10.838		100
exp3	9.14385	12.2458	15.0357	97.6857
Number of values	3	3	2	3
Minimum	6.761	10.84	15.04	97.69
25% Percentile	6.761	10.84	15.04	97.69
Median	9.144	12.25	24.88	100
75% Percentile	9.204	14.29	34.72	100
Maximum	9.204	14.29	34.72	100
Mean	8.37	12.46	24.88	99.23
Std. Deviation	1.393	1.738	13.92	1.336
Std. Error	0.8043	1.003	9.84	0.7714
Lower 95% CI of mean	4.909	8.143	-100.2	95.91
Upper 95% CI of mean	11.83	16.78	149.9	102.5
Sum	25.11	37.38	49.75	297.7
