# Supplementary material for: Histone H3 clipping is a novel signature of human neutrophil extracellular traps
Source: eLife. 2022 Oct 25;11:e68283. doi: 10.7554/eLife.68283 (PMC9665850; doi:10.7554/eLife.68283)
Supplement: Figure 2—source data 2. [file elife-68283-fig2-data2.xlsx]

## Sheet: Figure-2 Source Data-1 Absorban
Time (min)	Absorbance at 214 nm
0.035	0
0.0516667	-3.69428e-06
0.0683333	-1.03134e-05
0.085	-2.12408e-05
0.101667	-4.67797e-05
0.118333	-8.11606e-05
0.135	-0.00012208
0.151667	-0.00015808
0.168333	-0.000186005
0.185	-0.000208541
0.201667	-0.000225692
0.218333	-0.000247536
0.235	-0.000277845
0.251667	-0.000309153
0.268333	-0.000335153
0.285	-0.000356614
0.301667	-0.000370767
0.318333	-0.00038092
0.335	-0.000384225
0.351667	-0.000388687
0.368333	-0.000397839
0.385	-0.000413531
0.401667	-0.000430839
0.418333	-0.000439609
0.435	-0.000442687
0.451667	-0.000420534
0.468333	-0.000350997
0.485	-0.000197155
0.501667	4.06089e-05
0.518333	0.000311526
0.535	0.000559904
0.551667	0.000818591
0.568333	0.00140343
0.585	0.00281579
0.601667	0.00496391
0.618333	0.00673096
0.635	0.00697957
0.651667	0.00575497
0.668333	0.00412916
0.685	0.00293948
0.701667	0.00227034
0.718333	0.00194234
0.735	0.00180142
0.751667	0.00173488
0.768333	0.00164742
0.785	0.00151704
0.801667	0.00137804
0.818333	0.00126589
0.835	0.00119289
0.851667	0.00114558
0.868333	0.00110889
0.885	0.00107935
0.901667	0.00105981
0.918333	0.00105127
0.935	0.00104197
0.951667	0.00102759
0.968333	0.0010132
0.985	0.000996816
1.00167	0.000979586
1.01833	0.000963127
1.035	0.000951897
1.05167	0.000946355
1.06833	0.000942275
1.085	0.000939814
1.10167	0.000939125
1.11833	0.000936511
1.135	0.000934125
1.15167	0.000932353
1.16833	0.000930428
1.185	0.000933428
1.20167	0.000944967
1.21833	0.000961044
1.235	0.000965889
1.25167	0.000949809
1.26833	0.000933114
1.285	0.000929809
1.30167	0.000933736
1.31833	0.000936814
1.335	0.00094112
1.35167	0.000948964
1.36833	0.000966736
1.385	0.00100974
1.40167	0.00108474
1.41833	0.0011632
1.435	0.0012082
1.45167	0.00122696
1.46833	0.00122966
1.485	0.00122496
1.50167	0.00120589
1.51833	0.00117766
1.535	0.00114828
1.55167	0.00111912
1.56833	0.00106227
1.585	0.000537365
1.60167	-0.00228617
1.61833	-0.0100167
1.635	-0.0215707
1.65167	-0.0292259
1.66833	-0.0246388
1.685	-0.00771609
1.70167	0.0148045
1.71833	0.0434694
1.735	0.0933652
1.75167	0.177114
1.76833	0.283329
1.785	0.38056
1.80167	0.44262
1.81833	0.464228
1.835	0.453602
1.85167	0.420809
1.86833	0.37471
1.885	0.322665
1.90167	0.269816
1.91833	0.21933
1.935	0.173411
1.95167	0.133534
1.96833	0.10027
1.985	0.0734807
2.00167	0.0525905
2.01833	0.0367876
2.035	0.0252237
2.05167	0.0170945
2.06833	0.0116361
2.085	0.00806563
2.10167	0.00574928
2.11833	0.00424694
2.135	0.00327315
2.15167	0.00263966
2.16833	0.00222341
2.185	0.00193746
2.20167	0.00172022
2.21833	0.00155313
2.235	0.0014425
2.25167	0.00139426
2.26833	0.00139671
2.285	0.00144309
2.30167	0.0015527
2.31833	0.00188131
2.335	0.00294462
2.35167	0.00568448
2.36833	0.0109918
2.385	0.0188761
2.40167	0.028066
2.41833	0.0366814
2.435	0.0434635
2.45167	0.0484215
2.46833	0.052392
2.485	0.0561745
2.50167	0.0600763
2.51833	0.0639393
2.535	0.0673088
2.55167	0.0695962
2.56833	0.0703035
2.585	0.0702999
2.60167	0.0789273
2.61833	0.119019
2.635	0.207083
2.65167	0.32707
2.66833	0.437743
2.685	0.50871
2.70167	0.541104
2.71833	0.551385
2.735	0.551695
2.75167	0.547391
2.76833	0.540433
2.785	0.531582
2.80167	0.521225
2.81833	0.509623
2.835	0.496992
2.85167	0.483579
2.86833	0.469514
2.885	0.45477
2.90167	0.439345
2.91833	0.423402
2.935	0.407174
2.95167	0.390821
2.96833	0.374542
2.985	0.358488
3.00167	0.342643
3.01833	0.326916
3.035	0.311309
3.05167	0.295943
3.06833	0.280907
3.085	0.266319
3.10167	0.252255
3.11833	0.238665
3.135	0.225391
3.15167	0.212346
3.16833	0.199577
3.185	0.187131
3.20167	0.175069
3.21833	0.163462
3.235	0.152307
3.25167	0.141495
3.26833	0.130917
3.285	0.120589
3.30167	0.110582
3.31833	0.100977
3.335	0.0919086
3.35167	0.083485
3.36833	0.0757313
3.385	0.0686104
3.40167	0.0621103
3.41833	0.056248
3.435	0.0510099
3.45167	0.0463701
3.46833	0.0422935
3.485	0.0387145
3.50167	0.035556
3.51833	0.0327576
3.535	0.0302922
3.55167	0.0281227
3.56833	0.0262007
3.585	0.0244883
3.60167	0.022955
3.61833	0.0215734
3.635	0.0203093
3.65167	0.0191407
3.66833	0.0180533
3.685	0.0170487
3.70167	0.0161327
3.71833	0.0153059
3.735	0.0145541
3.75167	0.0138584
3.76833	0.0132146
3.785	0.0126185
3.80167	0.0120711
3.81833	0.0115696
3.835	0.0111124
3.85167	0.0106892
3.86833	0.0102853
3.885	0.00990034
3.90167	0.00952034
3.91833	0.0091515
3.935	0.00880143
3.95167	0.00848344
3.96833	0.00819829
3.985	0.0079316
4.00167	0.00768399
4.01833	0.00744884
4.035	0.00723
4.05167	0.00702208
4.06833	0.00682155
4.085	0.0066254
4.10167	0.00642956
4.11833	0.0062351
4.135	0.00604241
4.15167	0.00585072
4.16833	0.00566057
4.185	0.00547588
4.20167	0.00530258
4.21833	0.00514612
4.235	0.00500112
4.25167	0.00486051
4.26833	0.00472383
4.285	0.0045876
4.30167	0.00444683
4.31833	0.00430283
4.335	0.00416368
4.35167	0.00403522
4.36833	0.00391083
4.385	0.00379268
4.40167	0.00368091
4.41833	0.00357523
4.435	0.00347531
4.45167	0.00337792
4.46833	0.00328946
4.485	0.00321054
4.50167	0.00313347
4.51833	0.00305816
4.535	0.00298124
4.55167	0.00290816
4.56833	0.0028437
4.585	0.00278631
4.60167	0.00273808
4.61833	0.00269108
4.635	0.0026397
4.65167	0.00258778
4.66833	0.00254409
4.685	0.00250032
4.70167	0.00244925
4.71833	0.00239471
4.735	0.00234402
4.75167	0.00230271
4.76833	0.0022631
4.785	0.00221756
4.80167	0.00216149
4.81833	0.0021048
4.835	0.00206056
4.85167	0.00202426
4.86833	0.00198987
4.885	0.00196295
4.90167	0.0019518
4.91833	0.00196088
4.935	0.00199111
4.95167	0.00203811
4.96833	0.00210003
4.985	0.00217725
5.00167	0.00227318
5.01833	0.00238448
5.035	0.00251086
5.05167	0.00264671
5.06833	0.00277562
5.085	0.00288516
5.10167	0.00298231
5.11833	0.00307501
5.135	0.00314662
5.15167	0.003194
5.16833	0.00321462
5.185	0.00321208
5.20167	0.00318131
5.21833	0.00312539
5.235	0.00305193
5.25167	0.00296201
5.26833	0.00285939
5.285	0.00275432
5.30167	0.00265363
5.31833	0.00255578
5.335	0.00244779
5.35167	0.00232294
5.36833	0.00219564
5.385	0.00207748
5.40167	0.00196926
5.41833	0.0018548
5.435	0.00173941
5.45167	0.00164642
5.46833	0.00157319
5.485	0.00151434
5.50167	0.00146311
5.51833	0.00141996
5.535	0.00138473
5.55167	0.00135235
5.56833	0.0013212
5.585	0.00128789
5.60167	0.00125342
5.61833	0.00122396
5.635	0.00120227
5.65167	0.00118312
5.66833	0.00116727
5.685	0.00116673
5.70167	0.00117319
5.71833	0.00118619
5.735	0.00119542
5.75167	0.0011965
5.76833	0.00118812
5.785	0.00116866
5.80167	0.0011555
5.81833	0.00115535
5.835	0.00116758
5.85167	0.00119489
5.86833	0.00123827
5.885	0.00130234
5.90167	0.00137965
5.91833	0.00146211
5.935	0.00154241
5.95167	0.00161418
5.96833	0.00167702
5.985	0.00172179
6.00167	0.00174271
6.01833	0.00173802
6.035	0.00171479
6.05167	0.00167757
6.06833	0.00162649
6.085	0.0015598
6.10167	0.00147949
6.11833	0.0013825
6.135	0.00127088
6.15167	0.00115166
6.16833	0.00104112
6.185	0.000937583
6.20167	0.000836583
6.21833	0.000754814
6.235	0.000700661
6.25167	0.000677511
6.26833	0.000662127
6.285	0.000643972
6.30167	0.000625047
6.31833	0.000605433
6.335	0.000585127
6.35167	0.000566052
6.36833	0.000546899
6.385	0.000525205
6.40167	0.000507663
6.41833	0.000502739
6.435	0.000505125
6.45167	0.000501897
6.46833	0.000481977
6.485	0.00045621
6.50167	0.000433057
6.51833	0.000416288
6.535	0.000407749
6.55167	0.000397132
6.56833	0.000387438
6.585	0.000379821
6.60167	0.000376285
6.61833	0.000374518
6.635	0.00037121
6.65167	0.000371593
6.66833	0.000369746
6.685	0.000363363
6.70167	0.000357671
6.71833	0.000353132
6.735	0.000355749
6.75167	0.000361904
6.76833	0.000378521
6.785	0.000404213
6.80167	0.000428057
6.81833	0.000447288
6.835	0.000453518
6.85167	0.00045221
6.86833	0.00045098
6.885	0.000447518
6.90167	0.000445596
6.91833	0.000440363
6.935	0.00044336
6.95167	0.000455052
6.96833	0.000467824
6.985	0.000472365
7.00167	0.000459135
7.01833	0.000440518
7.035	0.000424824
7.05167	0.000417516
7.06833	0.000404363
7.085	0.000379288
7.10167	0.000346441
7.11833	0.000318438
7.135	0.000299513
7.15167	0.000290516
7.16833	0.000280365
7.185	0.000261443
7.20167	0.000241366
7.21833	0.000221518
7.235	0.000204443
7.25167	0.000180215
7.26833	0.000150293
7.285	0.000125524
7.30167	0.000102676
7.31833	9.19846e-05
7.335	8.66012e-05
7.35167	7.76789e-05
7.36833	6.58343e-05
7.385	5.59898e-05
7.40167	5.36815e-05
7.41833	5.5526e-05
7.435	5.42929e-05
7.45167	5.21375e-05
7.46833	5.32903e-05
7.485	5.77515e-05
7.50167	6.87541e-05
7.51833	8.32178e-05
7.535	8.86789e-05
7.55167	8.24458e-05
7.56833	7.28292e-05
7.585	6.32152e-05
7.60167	5.32929e-05
7.61833	4.36012e-05
7.635	3.82929e-05
7.65167	2.96763e-05
7.66833	7.67378e-06
7.685	-1.46345e-05
7.70167	-3.07874e-05
7.71833	-4.18625e-05
7.735	-5.74765e-05
7.75167	-7.37848e-05
7.76833	-8.17097e-05
7.785	-8.52485e-05
7.80167	-9.68625e-05
7.81833	-0.000112324
7.835	-0.00012071
7.85167	-0.000120096
7.86833	-0.000116401
7.885	-0.000113321
7.90167	-0.000107396
7.91833	-0.000104707
7.935	-9.98651e-05
7.95167	-9.80982e-05
7.96833	-9.84039e-05
7.985	-9.42485e-05
8.00167	-8.97096e-05
8.01833	-8.70931e-05
8.035	-8.77848e-05
8.05167	-8.87848e-05
8.06833	-9.01708e-05
8.085	-8.98625e-05
8.10167	-9.07071e-05
8.11833	-8.56294e-05
8.135	-7.33211e-05
8.15167	-6.38599e-05
8.16833	-5.83988e-05
8.185	-5.86294e-05
8.20167	-5.42434e-05
8.21833	-5.1088e-05
8.235	-5.79351e-05
8.25167	-6.56294e-05
8.26833	-7.18625e-05
8.285	-6.86319e-05
8.30167	-6.33237e-05
8.31833	-6.86319e-05
8.335	-8.41708e-05
8.35167	-0.000100785
8.36833	-0.000107243
8.385	-0.000105549
8.40167	-0.000102857
8.41833	-0.000102168
8.435	-0.00010471
8.45167	-0.000105479
8.46833	-0.000107554
8.485	-0.000115938
8.50167	-0.000128168
8.51833	-0.000137243
8.535	-0.000134319
8.55167	-0.000124471
8.56833	-0.000117318
8.585	-0.000113318
8.60167	-0.000115857
8.61833	-0.000119704
8.635	-0.000118705
8.65167	-0.000111935
8.66833	-0.000104396
8.685	-0.000101552
8.70167	-0.000104093
8.71833	-0.000109326
8.735	-0.000115173
8.75167	-0.00011671
8.76833	-0.000113246
8.785	-0.000114707
8.80167	-0.000121324
8.81833	-0.000126479
8.835	-0.000126787
8.85167	-0.00012194
8.86833	-0.000119785
8.885	-0.000122707
8.90167	-0.000133015
8.91833	-0.000144863
8.935	-0.000152401
8.95167	-0.000156862
8.96833	-0.000157785
8.985	-0.000149554
9.00167	-0.000136787
9.01833	-0.000120559
9.035	-0.000113637
9.05167	-0.000114559
9.06833	-0.000110943
9.085	-0.000104018
9.10167	-9.08625e-05
9.11833	-8.29402e-05
9.135	-7.92511e-05
9.15167	-7.60982e-05
9.16833	-7.08651e-05
9.185	-6.28625e-05
9.20167	-5.86319e-05
9.21833	-5.30179e-05
9.235	-3.78651e-05
9.25167	-1.38651e-05
9.26833	1.11349e-05
9.285	3.32878e-05
9.30167	5.74406e-05
9.31833	8.12852e-05
9.335	0.00011021
9.35167	0.000143288
9.36833	0.00018321
9.385	0.000225669
9.40167	0.000262897
9.41833	0.000297435
9.435	0.000331205
9.45167	0.000371666
9.46833	0.00041405
9.485	0.000459202
9.50167	0.000508278
9.51833	0.000561353
9.535	0.000616889
9.55167	0.000671886
9.56833	0.000731578
9.585	0.000782964
9.60167	0.00082312
9.61833	0.000861656
9.635	0.000912884
9.65167	0.000980267
9.66833	0.00105404
9.685	0.00113304
9.70167	0.00121027
9.71833	0.00127965
9.735	0.00134903
9.75167	0.00141679
9.76833	0.00149264
9.785	0.00157394
9.80167	0.00166171
9.81833	0.0017514
9.835	0.00183717
9.85167	0.00192455
9.86833	0.00201124
9.885	0.00210009
9.90167	0.0021947
9.91833	0.00229939
9.935	0.00241115
9.95167	0.0025263
9.96833	0.00264784
9.985	0.00277915
10.0017	0.0029186
10.0183	0.00307337
10.035	0.00324114
10.0517	0.00342098
10.0683	0.00360297
10.085	0.00378666
10.1017	0.00398435
10.1183	0.00419127
10.135	0.00440896
10.1517	0.00463756
10.1683	0.00488455
10.185	0.00514678
10.2017	0.00541255
10.2183	0.00568839
10.235	0.00597523
10.2517	0.00626884
10.2683	0.0065693
10.285	0.00687898
10.3017	0.00719228
10.3183	0.00750781
10.335	0.00782226
10.3517	0.00814133
10.3683	0.00845563
10.385	0.00877217
10.4017	0.00910239
10.4183	0.00944215
10.435	0.00978868
10.4517	0.0101346
10.4683	0.0104816
10.485	0.0108298
10.5017	0.0111893
10.5183	0.0115737
10.535	0.0119834
10.5517	0.0124237
10.5683	0.0129013
10.585	0.0134234
10.6017	0.013947
10.6183	0.0144187
10.635	0.0148372
10.6517	0.0153217
10.6683	0.0160468
10.685	0.0171266
10.7017	0.0186118
10.7183	0.0205071
10.735	0.0227831
10.7517	0.025326
10.7683	0.0279443
10.785	0.0304235
10.8017	0.0325299
10.8183	0.0339973
10.835	0.0345264
10.8517	0.0339655
10.8683	0.0324957
10.885	0.030514
10.9017	0.0284036
10.9183	0.0263805
10.935	0.0245805
10.9517	0.0231282
10.9683	0.0220958
10.985	0.0215248
11.0017	0.0214094
11.0183	0.02166
11.035	0.0220784
11.0517	0.0224344
11.0683	0.0225961
11.085	0.022583
11.1017	0.0225928
11.1183	0.0229043
11.135	0.0236108
11.1517	0.0244181
11.1683	0.0249149
11.185	0.0250513
11.2017	0.0251455
11.2183	0.0263884
11.235	0.0505863
11.2517	0.172472
11.2683	0.485679
11.285	0.997201
11.3017	1.56305
11.3183	2.00159
11.335	2.24098
11.3517	2.33459
11.3683	2.36447
11.385	2.37241
11.4017	2.37404
11.4183	2.37236
11.435	2.36933
11.4517	2.36583
11.4683	2.3634
11.485	2.36099
11.5017	2.35711
11.5183	2.3528
11.535	2.3478
11.5517	2.34119
11.5683	2.33237
11.585	2.32157
11.6017	2.30934
11.6183	2.29614
11.635	2.28204
11.6517	2.26705
11.6683	2.25056
11.685	2.23333
11.7017	2.21668
11.7183	2.20025
11.735	2.18258
11.7517	2.16318
11.7683	2.14327
11.785	2.12407
11.8017	2.10608
11.8183	2.08717
11.835	2.06544
11.8517	2.04053
11.8683	2.01352
11.885	1.98557
11.9017	1.95683
11.9183	1.92743
11.935	1.89711
11.9517	1.86519
11.9683	1.83174
11.985	1.79698
12.0017	1.76098
12.0183	1.72355
12.035	1.68552
12.0517	1.64774
12.0683	1.60989
12.085	1.57096
12.1017	1.5304
12.1183	1.48882
12.135	1.44587
12.1517	1.40133
12.1683	1.35628
12.185	1.31187
12.2017	1.26806
12.2183	1.22347
12.235	1.17746
12.2517	1.13043
12.2683	1.08345
12.285	1.03835
12.3017	0.994644
12.3183	0.948306
12.335	0.895408
12.3517	0.836203
12.3683	0.774886
12.385	0.715359
12.4017	0.659813
12.4183	0.608309
12.435	0.55904
12.4517	0.510366
12.4683	0.462934
12.485	0.419347
12.5017	0.380851
12.5183	0.346787
12.535	0.316852
12.5517	0.291564
12.5683	0.272364
12.585	0.259372
12.6017	0.249411
12.6183	0.236919
12.635	0.218248
12.6517	0.196215
12.6683	0.176702
12.685	0.163092
12.7017	0.154302
12.7183	0.14722
12.735	0.139746
12.7517	0.131763
12.7683	0.125125
12.785	0.122276
12.8017	0.124809
12.8183	0.133299
12.835	0.146286
12.8517	0.161322
12.8683	0.178957
12.885	0.203052
12.9017	0.232355
12.9183	0.254427
12.935	0.253833
12.9517	0.228494
12.9683	0.191216
12.985	0.156967
13.0017	0.132612
13.0183	0.11679
13.035	0.106327
13.0517	0.0984328
13.0683	0.0917443
13.085	0.0861769
13.1017	0.0824353
13.1183	0.081086
13.135	0.0816937
13.1517	0.0830861
13.1683	0.08398
13.185	0.0835072
13.2017	0.0813462
13.2183	0.0777821
13.235	0.0735423
13.2517	0.0693386
13.2683	0.0656466
13.285	0.0626812
13.3017	0.060446
13.3183	0.0588245
13.335	0.0578636
13.3517	0.0579524
13.3683	0.059447
13.385	0.0622455
13.4017	0.0656989
13.4183	0.0687485
13.435	0.0702479
13.4517	0.0695417
13.4683	0.0670371
13.485	0.063997
13.5017	0.0616321
13.5183	0.0604463
13.535	0.0603249
13.5517	0.0609432
13.5683	0.061877
13.585	0.0627807
13.6017	0.0634532
13.6183	0.0637045
13.635	0.0634286
13.6517	0.0627148
13.6683	0.0618408
13.685	0.0609856
13.7017	0.0602055
13.7183	0.0596995
13.735	0.0596541
13.7517	0.0600222
13.7683	0.0605868
13.785	0.0612584
13.8017	0.0620441
13.8183	0.0627783
13.835	0.0632649
13.8517	0.0633474
13.8683	0.0628204
13.885	0.0615773
13.9017	0.0597954
13.9183	0.0579224
13.935	0.0562459
13.9517	0.0547861
13.9683	0.053586
13.985	0.0526037
14.0017	0.0516408
14.0183	0.0505449
14.035	0.0495123
14.0517	0.0490156
14.0683	0.0493351
14.085	0.0504546
14.1017	0.0521526
14.1183	0.0538964
14.135	0.0549403
14.1517	0.0547757
14.1683	0.0534677
14.185	0.0515403
14.2017	0.0495671
14.2183	0.048024
14.235	0.0470945
14.2517	0.0466001
14.2683	0.0462967
14.285	0.0462315
14.3017	0.0465848
14.3183	0.0472451
14.335	0.0478527
14.3517	0.0481912
14.3683	0.0482037
14.385	0.0477317
14.4017	0.046572
14.4183	0.0448741
14.435	0.0431398
14.4517	0.0417837
14.4683	0.0410282
14.485	0.0409111
14.5017	0.0412752
14.5183	0.0418562
14.535	0.0426815
14.5517	0.0442546
14.5683	0.0469909
14.585	0.0505761
14.6017	0.0541488
14.6183	0.0568825
14.635	0.0583268
14.6517	0.0582228
14.6683	0.056458
14.685	0.053288
14.7017	0.0493501
14.7183	0.0455599
14.735	0.0427703
14.7517	0.0413871
14.7683	0.0411652
14.785	0.0416209
14.8017	0.0426766
14.8183	0.0444662
14.835	0.0467175
14.8517	0.0487178
14.8683	0.0499071
14.885	0.0500668
14.9017	0.0490282
14.9183	0.0468354
14.935	0.0440316
14.9517	0.0414578
14.9683	0.0396415
14.985	0.0386064
15.0017	0.0381812
15.0183	0.0381715
15.035	0.0384144
15.0517	0.0388882
15.0683	0.0396729
15.085	0.0407415
15.1017	0.041868
15.1183	0.0428959
15.135	0.044006
15.1517	0.0453148
15.1683	0.0464014
15.185	0.0467669
15.2017	0.0463173
15.2183	0.0453117
15.235	0.0439741
15.2517	0.0424228
15.2683	0.0408463
15.285	0.0391843
15.3017	0.0373143
15.3183	0.0354458
15.335	0.0340252
15.3517	0.0332509
15.3683	0.0329363
15.385	0.0328545
15.4017	0.0328212
15.4183	0.0326143
15.435	0.0321623
15.4517	0.0317415
15.4683	0.0316496
15.485	0.0318515
15.5017	0.0321428
15.5183	0.0324709
15.535	0.0327901
15.5517	0.0329448
15.5683	0.0329709
15.585	0.033137
15.6017	0.033604
15.6183	0.0342264
15.635	0.0348627
15.6517	0.0355607
15.6683	0.0363405
15.685	0.0372127
15.7017	0.0383047
15.7183	0.0397419
15.735	0.0414365
15.7517	0.0431776
15.7683	0.045007
15.785	0.0471054
15.8017	0.0493997
15.8183	0.051709
15.835	0.0539477
15.8517	0.0561209
15.8683	0.0581171
15.885	0.0598327
15.9017	0.0612993
15.9183	0.062421
15.935	0.0629453
15.9517	0.0627527
15.9683	0.0619852
15.985	0.0607371
16.0017	0.0589704
16.0183	0.0568064
16.035	0.0545135
16.0517	0.0523138
16.0683	0.0503897
16.085	0.0489629
16.1017	0.0481376
16.1183	0.0477349
16.135	0.0475327
16.1517	0.047407
16.1683	0.0471925
16.185	0.0467624
16.2017	0.0462271
16.2183	0.0458385
16.235	0.0456444
16.2517	0.0455345
16.2683	0.0455716
16.285	0.045816
16.3017	0.0460732
16.3183	0.0461348
16.335	0.0460818
16.3517	0.0461507
16.3683	0.0463953
16.385	0.0467734
16.4017	0.0472366
16.4183	0.0475903
16.435	0.0476463
16.4517	0.0474691
16.4683	0.0472626
16.485	0.047059
16.5017	0.0468429
16.5183	0.0466582
16.535	0.0464112
16.5517	0.0459096
16.5683	0.0451587
16.585	0.0443938
16.6017	0.0437562
16.6183	0.0432584
16.635	0.0429088
16.6517	0.0426339
16.6683	0.0422402
16.685	0.041697
16.7017	0.0411684
16.7183	0.0407486
16.735	0.040417
16.7517	0.0401882
16.7683	0.0400628
16.785	0.0398922
16.8017	0.0395766
16.8183	0.0392176
16.835	0.0389516
16.8517	0.0387623
16.8683	0.038646
16.885	0.0386404
16.9017	0.0386497
16.9183	0.0385345
16.935	0.0383291
16.9517	0.038193
16.9683	0.0381581
16.985	0.0381984
17.0017	0.0383079
17.0183	0.0384332
17.035	0.0384453
17.0517	0.0383249
17.0683	0.0381842
17.085	0.038063
17.1017	0.0379313
17.1183	0.0377977
17.135	0.0376637
17.1517	0.0374294
17.1683	0.0370438
17.185	0.0365895
17.2017	0.0361541
17.2183	0.0356982
17.235	0.0351884
17.2517	0.03465
17.2683	0.034076
17.285	0.0334372
17.3017	0.032771
17.3183	0.0321702
17.335	0.031671
17.3517	0.0312777
17.3683	0.0309654
17.385	0.0306717
17.4017	0.0303376
17.4183	0.0299863
17.435	0.0296807
17.4517	0.0294358
17.4683	0.0292529
17.485	0.0291374
17.5017	0.0290574
17.5183	0.0289551
17.535	0.0288376
17.5517	0.0287351
17.5683	0.0286513
17.585	0.0285732
17.6017	0.0285208
17.6183	0.0285006
17.635	0.0284722
17.6517	0.0284358
17.6683	0.0284211
17.685	0.0284252
17.7017	0.0284058
17.7183	0.0283608
17.735	0.0283118
17.7517	0.0282536
17.7683	0.0281798
17.785	0.028112
17.8017	0.0280645
17.8183	0.0280088
17.835	0.027935
17.8517	0.0278642
17.8683	0.027805
17.885	0.0277589
17.9017	0.0277332
17.9183	0.0277123
17.935	0.0276522
17.9517	0.0275324
17.9683	0.0273853
17.985	0.0272405
18.0017	0.0270902
18.0183	0.0269333
18.035	0.0267714
18.0517	0.0265825
18.0683	0.0263275
18.085	0.0260191
18.1017	0.0257154
18.1183	0.0254392
18.135	0.0251675
18.1517	0.0248938
18.1683	0.0246406
18.185	0.024394
18.2017	0.0241246
18.2183	0.0238482
18.235	0.0236051
18.2517	0.0233976
18.2683	0.0232139
18.285	0.0230539
18.3017	0.0229196
18.3183	0.0227759
18.335	0.0226176
18.3517	0.0224902
18.3683	0.0224145
18.385	0.0223647
18.4017	0.0223139
18.4183	0.0222622
18.435	0.0221912
18.4517	0.0220826
18.4683	0.0219562
18.485	0.0218557
18.5017	0.0217782
18.5183	0.0216987
18.535	0.0216165
18.5517	0.021524
18.5683	0.0213937
18.585	0.0212298
18.6017	0.0210847
18.6183	0.0209823
18.635	0.020894
18.6517	0.0208004
18.6683	0.0207076
18.685	0.0206009
18.7017	0.0204696
18.7183	0.0203591
18.735	0.0202897
18.7517	0.0202313
18.7683	0.0201585
18.785	0.0200847
18.8017	0.0200006
18.8183	0.0198697
18.835	0.019717
18.8517	0.0195994
18.8683	0.0195228
18.885	0.0194339
18.9017	0.0193254
18.9183	0.0192128
18.935	0.0190901
18.9517	0.0189586
18.9683	0.018858
18.985	0.0188156
19.0017	0.0188195
19.0183	0.0188859
19.035	0.0190552
19.0517	0.0193453
19.0683	0.0197659
19.085	0.0203486
19.1017	0.021104
19.1183	0.0219804
19.135	0.0229204
19.1517	0.0238567
19.1683	0.0247066
19.185	0.0254342
19.2017	0.0260556
19.2183	0.0265802
19.235	0.0269693
19.2517	0.0272444
19.2683	0.0274564
19.285	0.0276211
19.3017	0.0277317
19.3183	0.0278291
19.335	0.0279577
19.3517	0.0280811
19.3683	0.0281425
19.385	0.028104
19.4017	0.0279335
19.4183	0.0275711
19.435	0.0269977
19.4517	0.0262716
19.4683	0.0254463
19.485	0.0245511
19.5017	0.0236284
19.5183	0.022757
19.535	0.021992
19.5517	0.0213414
19.5683	0.020827
19.585	0.0204516
19.6017	0.0202011
19.6183	0.0200569
19.635	0.0199914
19.6517	0.0199589
19.6683	0.0199232
19.685	0.0198972
19.7017	0.019902
19.7183	0.019926
19.735	0.0199638
19.7517	0.0200021
19.7683	0.020002
19.785	0.0199523
19.8017	0.0199123
19.8183	0.0199303
19.835	0.0199694
19.8517	0.01998
19.8683	0.019941
19.885	0.0198446
19.9017	0.0196962
19.9183	0.0195546
19.935	0.0194745
19.9517	0.0194321
19.9683	0.0193849
19.985	0.0193036
20.0017	0.019164
20.0183	0.0189685
20.035	0.0187854
20.0517	0.0186731
20.0683	0.0186001
20.085	0.0185187
20.1017	0.0184267
20.1183	0.0183129
20.135	0.0181695
20.1517	0.0180455
20.1683	0.0179982
20.185	0.0180092
20.2017	0.0180246
20.2183	0.0180264
20.235	0.0179978
20.2517	0.0179316
20.2683	0.0178741
20.285	0.0178779
20.3017	0.0179159
20.3183	0.0179319
20.335	0.0179385
20.3517	0.0179441
20.3683	0.0179371
20.385	0.0179379
20.4017	0.0179909
20.4183	0.0180842
20.435	0.0181801
20.4517	0.0182705
20.4683	0.0183353
20.485	0.0183463
20.5017	0.0183424
20.5183	0.0183989
20.535	0.0185057
20.5517	0.018615
20.5683	0.0187224
20.585	0.018812
20.6017	0.0188632
20.6183	0.0189007
20.635	0.0189651
20.6517	0.0190549
20.6683	0.0191447
20.685	0.019238
20.7017	0.0193036
20.7183	0.0193174
20.735	0.0193128
20.7517	0.019338
20.7683	0.0193799
20.785	0.0194092
20.8017	0.0194323
20.8183	0.0194327
20.835	0.0193954
20.8517	0.0193541
20.8683	0.0193501
20.885	0.0193677
20.9017	0.0193617
20.9183	0.0193254
20.935	0.0192529
20.9517	0.0191483
20.9683	0.0190668
20.985	0.0190512
21.0017	0.0190846
21.0183	0.0191357
21.035	0.0192062
21.0517	0.0192817
21.0683	0.019332
21.085	0.019383
21.1017	0.0194786
21.1183	0.0196143
21.135	0.0197597
21.1517	0.0199111
21.1683	0.0200596
21.185	0.0201824
21.2017	0.0203233
21.2183	0.0205329
21.235	0.0208056
21.2517	0.0211003
21.2683	0.0214204
21.285	0.021775
21.3017	0.0221176
21.3183	0.0224774
21.335	0.0229434
21.3517	0.0235406
21.3683	0.0242156
21.385	0.0249625
21.4017	0.0257995
21.4183	0.0266735
21.435	0.0275679
21.4517	0.0285887
21.4683	0.0297943
21.485	0.031107
21.5017	0.0324872
21.5183	0.0339852
21.535	0.0355658
21.5517	0.0371533
21.5683	0.0388405
21.585	0.0407344
21.6017	0.0427746
21.6183	0.0448516
21.635	0.0470072
21.6517	0.0492444
21.6683	0.0514639
21.685	0.0536884
21.7017	0.0560496
21.7183	0.0585298
21.735	0.0609635
21.7517	0.063363
21.7683	0.0657613
21.785	0.068087
21.8017	0.0702718
21.8183	0.0724191
21.835	0.0745825
21.8517	0.076627
21.8683	0.0784753
21.885	0.0801477
21.9017	0.0816297
21.9183	0.082875
21.935	0.0839362
21.9517	0.0848742
21.9683	0.085641
21.985	0.0861589
22.0017	0.0864164
22.0183	0.0864194
22.035	0.0861928
22.0517	0.0857777
22.0683	0.0852088
22.085	0.0844901
22.1017	0.0836325
22.1183	0.0826182
22.135	0.0814084
22.1517	0.0800363
22.1683	0.0785898
22.185	0.0771025
22.2017	0.0755678
22.2183	0.0740216
22.235	0.0724874
22.2517	0.0709177
22.2683	0.0693034
22.285	0.0677311
22.3017	0.0662395
22.3183	0.0648045
22.335	0.0634215
22.3517	0.0620965
22.3683	0.060761
22.385	0.0593969
22.4017	0.0581001
22.4183	0.0569339
22.435	0.0558421
22.4517	0.054774
22.4683	0.0537582
22.485	0.0527743
22.5017	0.0517852
22.5183	0.0508332
22.535	0.0499812
22.5517	0.0491975
22.5683	0.0484373
22.585	0.0477126
22.6017	0.0470266
22.6183	0.0463476
22.635	0.0456989
22.6517	0.0451437
22.6683	0.0446818
22.685	0.0442707
22.7017	0.0439091
22.7183	0.0436063
22.735	0.0433291
22.7517	0.0430663
22.7683	0.042852
22.785	0.0426904
22.8017	0.0425444
22.8183	0.0424023
22.835	0.0422812
22.8517	0.0421772
22.8683	0.0420904
22.885	0.0420537
22.9017	0.0420707
22.9183	0.0421037
22.935	0.0421391
22.9517	0.0421718
22.9683	0.0421866
22.985	0.0421823
23.0017	0.0421961
23.0183	0.0422449
23.035	0.0422926
23.0517	0.0423277
23.0683	0.0423542
23.085	0.04237
23.1017	0.0423698
23.1183	0.04237
23.135	0.0423698
23.1517	0.042351
23.1683	0.0423212
23.185	0.042287
23.2017	0.0422367
23.2183	0.0421565
23.235	0.0420857
23.2517	0.0420437
23.2683	0.04202
23.285	0.042006
23.3017	0.0420033
23.3183	0.0419998
23.335	0.04198
23.3517	0.0419746
23.3683	0.0420123
23.385	0.0420876
23.4017	0.0421808
23.4183	0.042287
23.435	0.0423904
23.4517	0.0424706
23.4683	0.0425413
23.485	0.0426394
23.5017	0.0427523
23.5183	0.0428553
23.535	0.0429354
23.5517	0.0429898
23.5683	0.0430163
23.585	0.04303
23.6017	0.0430618
23.6183	0.0431119
23.635	0.0431617
23.6517	0.0432002
23.6683	0.0432165
23.685	0.0431952
23.7017	0.0431482
23.7183	0.0431019
23.735	0.0430617
23.7517	0.0430135
23.7683	0.042956
23.785	0.0428891
23.8017	0.0428083
23.8183	0.042735
23.835	0.0427044
23.8517	0.042733
23.8683	0.042796
23.885	0.0428873
23.9017	0.043002
23.9183	0.0431196
23.935	0.0432374
23.9517	0.0433675
23.9683	0.0435228
23.985	0.0436963
24.0017	0.0438747
24.0183	0.0440537
24.035	0.0442171
24.0517	0.0443467
24.0683	0.0444576
24.085	0.0445526
24.1017	0.0446365
24.1183	0.0446996
24.135	0.0447301
24.1517	0.0447086
24.1683	0.0446327
24.185	0.0445376
24.2017	0.0444433
24.2183	0.0443445
24.235	0.0442309
24.2517	0.0441019
24.2683	0.0439441
24.285	0.0437385
24.3017	0.0435054
24.3183	0.0432637
24.335	0.0430235
24.3517	0.0427867
24.3683	0.0425623
24.385	0.0423471
24.4017	0.0421139
24.4183	0.0418617
24.435	0.0416249
24.4517	0.0414229
24.4683	0.0412488
24.485	0.0410995
24.5017	0.0409708
24.5183	0.0408553
24.535	0.040742
24.5517	0.0406535
24.5683	0.0406083
24.585	0.0405915
24.6017	0.0405864
24.6183	0.0405971
24.635	0.0406208
24.6517	0.040649
24.6683	0.0406801
24.685	0.0407317
24.7017	0.0408115
24.7183	0.0409134
24.735	0.0410436
24.7517	0.0412039
24.7683	0.0413819
24.785	0.0415581
24.8017	0.0417377
24.8183	0.0419358
24.835	0.0421627
24.8517	0.0424237
24.8683	0.0427113
24.885	0.0429923
24.9017	0.0432494
24.9183	0.0434836
24.935	0.0437157
24.9517	0.0439424
24.9683	0.044159
24.985	0.0443612
25.0017	0.0445261
25.0183	0.0446256
25.035	0.0446615
25.0517	0.0446635
25.0683	0.0446555
25.085	0.0446477
25.1017	0.0446369
25.1183	0.0446078
25.135	0.0445345
25.1517	0.0444068
25.1683	0.0442552
25.185	0.0440897
25.2017	0.0439108
25.2183	0.0437201
25.235	0.0435233
25.2517	0.0433227
25.2683	0.043121
25.285	0.0429418
25.3017	0.0427952
25.3183	0.0426679
25.335	0.0425483
25.3517	0.0424516
25.3683	0.0423853
25.385	0.0423404
25.4017	0.042316
25.4183	0.0423269
25.435	0.0423899
25.4517	0.0424989
25.4683	0.0426672
25.485	0.0428981
25.5017	0.0431765
25.5183	0.0434733
25.535	0.0438005
25.5517	0.0441814
25.5683	0.0446192
25.585	0.0451047
25.6017	0.0456366
25.6183	0.0462149
25.635	0.0468178
25.6517	0.0474376
25.6683	0.0480886
25.685	0.0487898
25.7017	0.0495364
25.7183	0.0503209
25.735	0.0511368
25.7517	0.0519581
25.7683	0.0527546
25.785	0.0535305
25.8017	0.05431
25.8183	0.0551009
25.835	0.0558922
25.8517	0.056661
25.8683	0.0574042
25.885	0.0580944
25.9017	0.0587171
25.9183	0.0592813
25.935	0.0597953
25.9517	0.0602651
25.9683	0.0606731
25.985	0.0610105
26.0017	0.0612839
26.0183	0.0615169
26.035	0.0617425
26.0517	0.0619888
26.0683	0.0622772
26.085	0.0626471
26.1017	0.0631405
26.1183	0.0637845
26.135	0.0646006
26.1517	0.0656336
26.1683	0.0669528
26.185	0.0685947
26.2017	0.0705659
26.2183	0.072837
26.235	0.0753454
26.2517	0.0779858
26.2683	0.0806287
26.285	0.0831592
26.3017	0.0854495
26.3183	0.0873788
26.335	0.0888629
26.3517	0.0898621
26.3683	0.0903672
26.385	0.0903923
26.4017	0.0899558
26.4183	0.0890477
26.435	0.0876773
26.4517	0.0858798
26.4683	0.0836823
26.485	0.0811292
26.5017	0.0783457
26.5183	0.0755249
26.535	0.0727715
26.5517	0.0701431
26.5683	0.0677018
26.585	0.0654749
26.6017	0.063429
26.6183	0.0615183
26.635	0.0597868
26.6517	0.0582622
26.6683	0.0569345
26.685	0.0558164
26.7017	0.0549472
26.7183	0.0543621
26.735	0.0540731
26.7517	0.0541038
26.7683	0.0544661
26.785	0.0551484
26.8017	0.0561299
26.8183	0.0573883
26.835	0.0588942
26.8517	0.0606095
26.8683	0.0625009
26.885	0.0645392
26.9017	0.066704
26.9183	0.0689726
26.935	0.0712981
26.9517	0.073604
26.9683	0.0758221
26.985	0.0778972
27.0017	0.079772
27.0183	0.0813916
27.035	0.0826976
27.0517	0.0836356
27.0683	0.0841566
27.085	0.0842148
27.1017	0.0838166
27.1183	0.0830367
27.135	0.0819738
27.1517	0.0807019
27.1683	0.0792779
27.185	0.0777752
27.2017	0.0762308
27.2183	0.074655
27.235	0.0730751
27.2517	0.0715558
27.2683	0.0701278
27.285	0.0687777
27.3017	0.0674943
27.3183	0.0662445
27.335	0.0649695
27.3517	0.0636279
27.3683	0.0622632
27.385	0.0609413
27.4017	0.0597271
27.4183	0.0586963
27.435	0.0579418
27.4517	0.0575248
27.4683	0.0574767
27.485	0.0578296
27.5017	0.0585939
27.5183	0.0597431
27.535	0.0612226
27.5517	0.0629786
27.5683	0.0649299
27.585	0.0669637
27.6017	0.0688949
27.6183	0.0705082
27.635	0.0715955
27.6517	0.0720333
27.6683	0.0718114
27.685	0.0710165
27.7017	0.069854
27.7183	0.0685983
27.735	0.0675304
27.7517	0.0668159
27.7683	0.0664604
27.785	0.0663648
27.8017	0.0664254
27.8183	0.0665734
27.835	0.0667702
27.8517	0.067
27.8683	0.0672402
27.885	0.0674368
27.9017	0.067498
27.9183	0.0673442
27.935	0.0669262
27.9517	0.0662672
27.9683	0.0654846
27.985	0.0647629
28.0017	0.064256
28.0183	0.0640293
28.035	0.0640824
28.0517	0.0643453
28.0683	0.0647213
28.085	0.0651008
28.1017	0.065408
28.1183	0.065586
28.135	0.0655975
28.1517	0.0654477
28.1683	0.0651685
28.185	0.0647933
28.2017	0.0643681
28.2183	0.0639733
28.235	0.0636914
28.2517	0.063566
28.2683	0.0635917
28.285	0.0636997
28.3017	0.0637805
28.3183	0.0637209
28.335	0.0634903
28.3517	0.0631578
28.3683	0.0628265
28.385	0.0625954
28.4017	0.0624935
28.4183	0.0624818
28.435	0.0624873
28.4517	0.0624612
28.4683	0.0624043
28.485	0.0623412
28.5017	0.0622932
28.5183	0.0622845
28.535	0.0623336
28.5517	0.0624401
28.5683	0.0625836
28.585	0.0627514
28.6017	0.0629276
28.6183	0.0631019
28.635	0.0632651
28.6517	0.0634176
28.6683	0.0635573
28.685	0.0636947
28.7017	0.0638974
28.7183	0.0642599
28.735	0.0648896
28.7517	0.0658882
28.7683	0.0673559
28.785	0.0693282
28.8017	0.0717537
28.8183	0.0745128
28.835	0.0774005
28.8517	0.0801701
28.8683	0.0825928
28.885	0.0845097
28.9017	0.0858281
28.9183	0.0865221
28.935	0.0866697
28.9517	0.0864351
28.9683	0.0859668
28.985	0.085358
29.0017	0.0846741
29.0183	0.0839986
29.035	0.0834416
29.0517	0.0831753
29.0683	0.0834286
29.085	0.0843947
29.1017	0.0861883
29.1183	0.0888025
29.135	0.0921263
29.1517	0.0959388
29.1683	0.0999499
29.185	0.103824
29.2017	0.107141
29.2183	0.109479
29.235	0.110501
29.2517	0.110041
29.2683	0.108059
29.285	0.104615
29.3017	0.0999421
29.3183	0.0945136
29.335	0.0889603
29.3517	0.0838578
29.3683	0.0796484
29.385	0.0766174
29.4017	0.074838
29.4183	0.0741418
29.435	0.074209
29.4517	0.0747121
29.4683	0.0753874
29.485	0.0760798
29.5017	0.0767807
29.5183	0.0775677
29.535	0.0785557
29.5517	0.0798649
29.5683	0.0815311
29.585	0.083447
29.6017	0.0853687
29.6183	0.0870048
29.635	0.0880961
29.6517	0.0884378
29.6683	0.0879582
29.685	0.0867859
29.7017	0.0852075
29.7183	0.083531
29.735	0.0820151
29.7517	0.0808241
29.7683	0.0800175
29.785	0.0795392
29.8017	0.0792938
29.8183	0.0792025
29.835	0.0791742
29.8517	0.0790984
29.8683	0.078911
29.885	0.0786079
29.9017	0.0782259
29.9183	0.0778429
29.935	0.0775413
29.9517	0.0773647
29.9683	0.077273
29.985	0.0771757
30.0017	0.0769629
30.0183	0.0765231
30.035	0.0758191
30.0517	0.0749106
30.0683	0.0739187
30.085	0.0729577
30.1017	0.0721718
30.1183	0.0717906
30.135	0.072085
30.1517	0.0732885
30.1683	0.075475
30.185	0.0785046
30.2017	0.0820793
30.2183	0.0858427
30.235	0.0894342
30.2517	0.0924423
30.2683	0.0944079
30.285	0.0949761
30.3017	0.094093
30.3183	0.0920067
30.335	0.0891248
30.3517	0.0859429
30.3683	0.0829678
30.385	0.0806166
30.4017	0.0791361
30.4183	0.0785568
30.435	0.0786973
30.4517	0.0791526
30.4683	0.0794445
30.485	0.0792042
30.5017	0.0782291
30.5183	0.0765319
30.535	0.0743778
30.5517	0.072179
30.5683	0.070349
30.585	0.0692444
30.6017	0.0692335
30.6183	0.0706258
30.635	0.073486
30.6517	0.0775138
30.6683	0.082058
30.685	0.0863189
30.7017	0.0895534
30.7183	0.0912545
30.735	0.0911984
30.7517	0.0894558
30.7683	0.0864769
30.785	0.0831145
30.8017	0.0805995
30.8183	0.0805325
30.835	0.0847453
30.8517	0.0946499
30.8683	0.110262
30.885	0.129783
30.9017	0.150096
30.9183	0.167589
30.935	0.17882
30.9517	0.181084
30.9683	0.173582
30.985	0.158038
31.0017	0.138211
31.0183	0.118588
31.035	0.103013
31.0517	0.0940052
31.0683	0.0925713
31.085	0.0984324
31.1017	0.110296
31.1183	0.125927
31.135	0.142248
31.1517	0.155845
31.1683	0.163746
31.185	0.164246
31.2017	0.157411
31.2183	0.145063
31.235	0.130016
31.2517	0.115163
31.2683	0.10262
31.285	0.093396
31.3017	0.0874052
31.3183	0.0837871
31.335	0.0815393
31.3517	0.0798956
31.3683	0.0784126
31.385	0.0769458
31.4017	0.075621
31.4183	0.0746882
31.435	0.0743619
31.4517	0.0747633
31.4683	0.0759031
31.485	0.0776119
31.5017	0.0795484
31.5183	0.0812625
31.535	0.0823173
31.5517	0.0824011
31.5683	0.0814193
31.585	0.0795552
31.6017	0.0771558
31.6183	0.074648
31.635	0.0724879
31.6517	0.071081
31.6683	0.0707618
31.685	0.0718294
31.7017	0.0746522
31.7183	0.0795464
31.735	0.0864707
31.7517	0.0947743
31.7683	0.10315
31.785	0.109914
31.8017	0.113475
31.8183	0.112936
31.835	0.108524
31.8517	0.101544
31.8683	0.0939484
31.885	0.0875538
31.9017	0.0834282
31.9183	0.0816891
31.935	0.0818041
31.9517	0.0830571
31.9683	0.0847813
31.985	0.0864614
32.0017	0.0878477
32.0183	0.0889834
32.035	0.090117
32.0517	0.0915957
32.0683	0.093824
32.085	0.09723
32.1017	0.102191
32.1183	0.109026
32.135	0.117924
32.1517	0.128793
32.1683	0.141263
32.185	0.154601
32.2017	0.167614
32.2183	0.178601
32.235	0.185864
32.2517	0.188427
32.2683	0.186274
32.285	0.180017
32.3017	0.170524
32.3183	0.15894
32.335	0.146438
32.3517	0.133994
32.3683	0.122328
32.385	0.112029
32.4017	0.103505
32.4183	0.0967504
32.435	0.0915824
32.4517	0.0878665
32.4683	0.0855797
32.485	0.0848294
32.5017	0.0858446
32.5183	0.0889171
32.535	0.0943194
32.5517	0.10216
32.5683	0.112106
32.585	0.123102
32.6017	0.133401
32.6183	0.141066
32.635	0.144556
32.6517	0.143186
32.6683	0.137288
32.685	0.128075
32.7017	0.117153
32.7183	0.106011
32.735	0.0957314
32.7517	0.086929
32.7683	0.0797856
32.785	0.0740945
32.8017	0.069551
32.8183	0.0659293
32.835	0.0630869
32.8517	0.0608988
32.8683	0.0592656
32.885	0.058116
32.9017	0.0573686
32.9183	0.05698
32.935	0.0569284
32.9517	0.0571569
32.9683	0.057553
32.985	0.0580031
33.0017	0.0584167
33.0183	0.0587259
33.035	0.0589432
33.0517	0.0591979
33.0683	0.0596575
33.085	0.0604425
33.1017	0.0616008
33.1183	0.0630621
33.135	0.064628
33.1517	0.0660239
33.1683	0.067031
33.185	0.0675378
33.2017	0.0675687
33.2183	0.0673178
33.235	0.0670258
33.2517	0.0668344
33.2683	0.0666805
33.285	0.0663654
33.3017	0.0656493
33.3183	0.0643212
33.335	0.0623271
[truncated: 2,501 more rows]
