# Supplementary material for: Histone H3 clipping is a novel signature of human neutrophil extracellular traps
Source: eLife. 2022 Oct 25;11:e68283. doi: 10.7554/eLife.68283 (PMC9665850; doi:10.7554/eLife.68283)
Supplement: Figure 3—figure supplement 4—source data 2. [file elife-68283-fig3-figsupp4-data2.xlsx]

## Sheet: Sheet1
REIRR (ng/ml)	100	10	1	0.1	Plasma + 3D9	Serum + 3D9	Plasma + iso	Serum + iso
donor 1	1.84075	1.06655	0.0813	0.04305	1.1238	0.00085	0.03175	0.00275
