# Supplementary material for: Histone H3 clipping is a novel signature of human neutrophil extracellular traps
Source: eLife. 2022 Oct 25;11:e68283. doi: 10.7554/eLife.68283 (PMC9665850; doi:10.7554/eLife.68283)
Supplement: Figure 3—source data 2. [file elife-68283-fig3-data2.xlsx]

## Sheet: Fig 3C
Substrate	REIRR	NETs	Chromatin	Histone H3	DNA
exp1	0.8948	0.87515	0.1303	0.154	0.0428
exp2	1.06655	0.628369	0.030969	0.023169	0
exp3	1.1397	0.8326	0.05198	0.24748	0.000825
Number of values	3	3	3	3	3
Minimum	0.8948	0.6284	0.03097	0.02317	0
25% Percentile	0.8948	0.6284	0.03097	0.02317	0
Median	1.067	0.8326	0.05198	0.154	0.000825
75% Percentile	1.14	0.8752	0.1303	0.2475	0.0428
Maximum	1.14	0.8752	0.1303	0.2475	0.0428
Mean	1.034	0.7787	0.07108	0.1415	0.01454
Std. Deviation	0.1257	0.1319	0.05235	0.1127	0.02448
Std. Error	0.07258	0.07617	0.03022	0.06505	0.01413
Lower 95% CI of mean	0.7214	0.451	-0.05896	-0.1383	-0.04626
Upper 95% CI of mean	1.346	1.106	0.2011	0.4214	0.07534
Sum	3.101	2.336	0.2132	0.4246	0.04363
