# Supplementary material for: Histone H3 clipping is a novel signature of human neutrophil extracellular traps
Source: eLife. 2022 Oct 25;11:e68283. doi: 10.7554/eLife.68283 (PMC9665850; doi:10.7554/eLife.68283)
Supplement: Figure 4—figure supplement 2—source data 1. [file elife-68283-fig4-figsupp2-data1.xlsx]

## Sheet: peptide sequence number
SEQ H3	MARTKQTARKSTGGKAPRKQLATKAARKSAPATGGVKKPHRYRPGTVALREIRRYQKSTELLIRKLPFQRLVREIAQDFKTDLRFQSSAVMALQEACEAYLVGLFEDTNLCAIHAKRVTIMPKDIQLARRIRGERA
RES. NUMBER		peptide sequence	label				peptides for replacement analysis
START	END
31	46	PATGGIKKLHRYIPL	HEL.IL				TEIRRIQKLTELIIL	RN.HEL			Labelling guide
32	47	ATGGVIKPLRYRIGL	HEL.IL				REIPRIQKLTELIIL	RN.HEL			HEL.IL = helical (HEL) 15aa
33	48	TGGVKIPHLYRPITL	HEL.IL				REIRTIQKLTELIIL	RN.HEL			HEL.IL9 = helical 9aa
34	49	GGVKKIHRLRPGIVL	HEL.IL				REIRDIQKLTELIIL	RN.HEL			LIN8 = Linear 8aa
35	50	GVKKPIRYLPGTIAL	HEL.IL				REDRRIQKLTELIIL	RN.HEL			LIN15 = linear 15aa
36	51	VKKPHIYRLGTVILL	HEL.IL				REIRRIQKLTELIIL	RN.HEL			RN.SS = replacement analysis - linear
37	52	KKPHRIRPLTVAIRL	HEL.IL				REYRRIQKLTELIIL	RN.HEL			RN.HEL = replacement analysis - helical
38	53	KPHRYIPGLVALIEL	HEL.IL				REIHRIQKLTELIIL	RN.HEL
39	54	PHRYRIGTLALRIIL	HEL.IL				SEIRRIQKLTELIIL	RN.HEL
40	55	HRYRPITVLLREIRL	HEL.IL				REIGRIQKLTELIIL	RN.HEL
41	56	RYRPGIVALREIIRL	HEL.IL				REVRRIQKLTELIIL	RN.HEL
42	57	YRPGTIALLEIRIYL	HEL.IL				REIRHIQKLTELIIL	RN.HEL
43	58	RPGTVILRLIRRIQL	HEL.IL				RSIRRIQKLTELIIL	RN.HEL
44	59	PGTVAIRELRRYIKL	HEL.IL				GEIRRIQKLTELIIL	RN.HEL
45	60	GTVALIEILRYQISL	HEL.IL				RNIRRIQKLTELIIL	RN.HEL
46	61	TVALRIIRLYQKITL	HEL.IL				QEIRRIQKLTELIIL	RN.HEL
47	62	VALREIRRLQKSIEL	HEL.IL				RFIRRIQKLTELIIL	RN.HEL
48	63	ALREIIRYLKSTILL	HEL.IL				REIRWIQKLTELIIL	RN.HEL
49	64	LREIRIYQLSTEILL	HEL.IL				REIRRIQKLTELIIL	RN.HEL
50	65	REIRRIQKLTELIIL	HEL.IL				RGIRRIQKLTELIIL	RN.HEL
51	66	EIRRYIKSLELLIRL	HEL.IL				RIIRRIQKLTELIIL	RN.HEL
52	67	IRRYQISTLLLIIKL	HEL.IL				REIRSIQKLTELIIL	RN.HEL
53	68	RRYQKITELLIRILL	HEL.IL				RENRRIQKLTELIIL	RN.HEL
54	69	RYQKSIELLIRKIPL	HEL.IL				REPRRIQKLTELIIL	RN.HEL
55	70	YQKSTILLLRKLIFL	HEL.IL				REIRIIQKLTELIIL	RN.HEL
56	71	QKSTEILILKLPIQL	HEL.IL				RHIRRIQKLTELIIL	RN.HEL
57	72	KSTELIIRLLPFIRL	HEL.IL				RESRRIQKLTELIIL	RN.HEL
31	39	PATGGIKKL	HEL.IL9				RRIRRIQKLTELIIL	RN.HEL
32	40	ATGGVIKPL	HEL.IL9				WEIRRIQKLTELIIL	RN.HEL
33	41	TGGVKIPHL	HEL.IL9				RQIRRIQKLTELIIL	RN.HEL
34	42	GGVKKIHRL	HEL.IL9				RWIRRIQKLTELIIL	RN.HEL
35	43	GVKKPIRYL	HEL.IL9				REIRPIQKLTELIIL	RN.HEL
36	44	VKKPHIYRL	HEL.IL9				REARRIQKLTELIIL	RN.HEL
37	45	KKPHRIRPL	HEL.IL9				REGRRIQKLTELIIL	RN.HEL
38	46	KPHRYIPGL	HEL.IL9				REIKRIQKLTELIIL	RN.HEL
39	47	PHRYRIGTL	HEL.IL9				REIARIQKLTELIIL	RN.HEL
40	48	HRYRPITVL	HEL.IL9				RYIRRIQKLTELIIL	RN.HEL
41	49	RYRPGIVAL	HEL.IL9				PEIRRIQKLTELIIL	RN.HEL
42	50	YRPGTIALL	HEL.IL9				RERRRIQKLTELIIL	RN.HEL
43	51	RPGTVILRL	HEL.IL9				REERRIQKLTELIIL	RN.HEL
44	52	PGTVAIREL	HEL.IL9				REIRYIQKLTELIIL	RN.HEL
45	53	GTVALIEIL	HEL.IL9				REI_RIQKLTELIIL	RN.HEL
46	54	TVALRIIRL	HEL.IL9				REIREIQKLTELIIL	RN.HEL
47	55	VALREIRRL	HEL.IL9				VEIRRIQKLTELIIL	RN.HEL
48	56	ALREIIRYL	HEL.IL9				HEIRRIQKLTELIIL	RN.HEL
49	57	LREIRIYQL	HEL.IL9				IEIRRIQKLTELIIL	RN.HEL
50	58	REIRRIQKL	HEL.IL9				REIDRIQKLTELIIL	RN.HEL
51	59	EIRRYIKSL	HEL.IL9				REIIRIQKLTELIIL	RN.HEL
52	60	IRRYQISTL	HEL.IL9				REIRVIQKLTELIIL	RN.HEL
53	61	RRYQKITEL	HEL.IL9				REIRRIQKLTELIIL	RN.HEL
54	62	RYQKSIELL	HEL.IL9				_EIRRIQKLTELIIL	RN.HEL
55	63	YQKSTILLL	HEL.IL9				RKIRRIQKLTELIIL	RN.HEL
56	64	QKSTEILIL	HEL.IL9				RTIRRIQKLTELIIL	RN.HEL
57	65	KSTELIIRL	HEL.IL9				YEIRRIQKLTELIIL	RN.HEL
58	66	STELLIRKL	HEL.IL9				REIRQIQKLTELIIL	RN.HEL
59	67	TELLIIKLL	HEL.IL9				RAIRRIQKLTELIIL	RN.HEL
60	68	ELLIRILPL	HEL.IL9				REKRRIQKLTELIIL	RN.HEL
61	69	LLIRKIPFL	HEL.IL9				REISRIQKLTELIIL	RN.HEL
62	70	LIRKLIFQL	HEL.IL9				REIRRIQKLTELIIL	RN.HEL
63	71	IRKLPIQRL	HEL.IL9				REIRRIQKLTELIIL	RN.HEL
31	45	PATGGVKKPHRYRPG	LIN15				REIRAIQKLTELIIL	RN.HEL
32	46	ATGGVKKPHRYRPGT	LIN15				REIRNIQKLTELIIL	RN.HEL
33	47	TGGVKKPHRYRPGTV	LIN15				REIERIQKLTELIIL	RN.HEL
34	48	GGVKKPHRYRPGTVA	LIN15				REIQRIQKLTELIIL	RN.HEL
35	49	GVKKPHRYRPGTVAL	LIN15				RPIRRIQKLTELIIL	RN.HEL
36	50	VKKPHRYRPGTVALR	LIN15				REIYRIQKLTELIIL	RN.HEL
37	51	KKPHRYRPGTVALRE	LIN15				NEIRRIQKLTELIIL	RN.HEL
38	52	KPHRYRPGTVALREI	LIN15				REITRIQKLTELIIL	RN.HEL
39	53	PHRYRPGTVALREIR	LIN15				R_IRRIQKLTELIIL	RN.HEL
40	54	HRYRPGTVALREIRR	LIN15				KEIRRIQKLTELIIL	RN.HEL
41	55	RYRPGTVALREIRRY	LIN15				AEIRRIQKLTELIIL	RN.HEL
42	56	YRPGTVALREIRRYQ	LIN15				REIFRIQKLTELIIL	RN.HEL
43	57	RPGTVALREIRRYQK	LIN15				REINRIQKLTELIIL	RN.HEL
44	58	PGTVALREIRRYQKS	LIN15				EEIRRIQKLTELIIL	RN.HEL
45	59	GTVALREIRRYQKST	LIN15				RVIRRIQKLTELIIL	RN.HEL
46	60	TVALREIRRYQKSTE	LIN15				RE_RRIQKLTELIIL	RN.HEL
47	61	VALREIRRYQKSTEL	LIN15				FEIRRIQKLTELIIL	RN.HEL
48	62	ALREIRRYQKSTELL	LIN15				REHRRIQKLTELIIL	RN.HEL
49	63	LREIRRYQKSTELLI	LIN15				REFRRIQKLTELIIL	RN.HEL
50	64	REIRRYQKSTELLIR	LIN15				REIRGIQKLTELIIL	RN.HEL
51	65	EIRRYQKSTELLIRK	LIN15				REIRKIQKLTELIIL	RN.HEL
52	66	IRRYQKSTELLIRKL	LIN15				REQRRIQKLTELIIL	RN.HEL
53	67	RRYQKSTELLIRKLP	LIN15				REIR_IQKLTELIIL	RN.HEL
54	68	RYQKSTELLIRKLPF	LIN15				REIVRIQKLTELIIL	RN.HEL
55	69	YQKSTELLIRKLPFQ	LIN15				DEIRRIQKLTELIIL	RN.HEL
56	70	QKSTELLIRKLPFQR	LIN15				RETRRIQKLTELIIL	RN.HEL
57	71	KSTELLIRKLPFQRL	LIN15				REIWRIQKLTELIIL	RN.HEL
47	54	VALREIRR	LIN8				REIRFIQKLTELIIL	RN.HEL
50	57	REIRRYQK	LIN8				RDIRRIQKLTELIIL	RN.HEL
53	60	RRYQKSTE	LIN8				REWRRIQKLTELIIL	RN.HEL
51	58	EIRRYQKS	LIN8				QEIRRYQKSTELLIRK	RN.SS
61	68	LLIRKLPF	LIN8				REIRAYQKSTELLIRK	RN.SS
49	56	LREIRRYQ	LIN8				NEIRRYQKSTELLIRK	RN.SS
48	55	ALREIRRY	LIN8				REIRQYQKSTELLIRK	RN.SS
31	38	PATGGVKK	LIN8				REVRRYQKSTELLIRK	RN.SS
41	48	RYRPGTVA	LIN8				HEIRRYQKSTELLIRK	RN.SS
59	66	TELLIRKL	LIN8				REIRRYQKSTELLIRK	RN.SS
62	69	LIRKLPFQ	LIN8				REIR_YQKSTELLIRK	RN.SS
58	65	STELLIRK	LIN8				REIRFYQKSTELLIRK	RN.SS
35	42	GVKKPHRY	LIN8				REIGRYQKSTELLIRK	RN.SS
37	44	KKPHRYRP	LIN8				REIFRYQKSTELLIRK	RN.SS
46	53	TVALREIR	LIN8				REIRRYQKSTELLIRK	RN.SS
33	40	TGGVKKPH	LIN8				RRIRRYQKSTELLIRK	RN.SS
63	70	IRKLPFQR	LIN8				_EIRRYQKSTELLIRK	RN.SS
60	67	ELLIRKLP	LIN8				REFRRYQKSTELLIRK	RN.SS
52	59	IRRYQKST	LIN8				RVIRRYQKSTELLIRK	RN.SS
45	52	GTVALREI	LIN8				REIYRYQKSTELLIRK	RN.SS
34	41	GGVKKPHR	LIN8				RESRRYQKSTELLIRK	RN.SS
43	50	RPGTVALR	LIN8				RGIRRYQKSTELLIRK	RN.SS
57	64	KSTELLIR	LIN8				REIDRYQKSTELLIRK	RN.SS
32	39	ATGGVKKP	LIN8				REIRIYQKSTELLIRK	RN.SS
38	45	KPHRYRPG	LIN8				PEIRRYQKSTELLIRK	RN.SS
40	47	HRYRPGTV	LIN8				REIRHYQKSTELLIRK	RN.SS
42	49	YRPGTVAL	LIN8				SEIRRYQKSTELLIRK	RN.SS
56	63	QKSTELLI	LIN8				REIRSYQKSTELLIRK	RN.SS
64	71	RKLPFQRL	LIN8				RYIRRYQKSTELLIRK	RN.SS
55	62	YQKSTELL	LIN8				REWRRYQKSTELLIRK	RN.SS
39	46	PHRYRPGT	LIN8				REISRYQKSTELLIRK	RN.SS
54	61	RYQKSTEL	LIN8				REIRNYQKSTELLIRK	RN.SS
36	43	VKKPHRYR	LIN8				REIRRYQKSTELLIRK	RN.SS
44	51	PGTVALRE	LIN8				REIRWYQKSTELLIRK	RN.SS
							RETRRYQKSTELLIRK	RN.SS
							RIIRRYQKSTELLIRK	RN.SS
							WEIRRYQKSTELLIRK	RN.SS
							REIRDYQKSTELLIRK	RN.SS
							REPRRYQKSTELLIRK	RN.SS
							RTIRRYQKSTELLIRK	RN.SS
							REIRRYQKSTELLIRK	RN.SS
							KEIRRYQKSTELLIRK	RN.SS
							REGRRYQKSTELLIRK	RN.SS
							RPIRRYQKSTELLIRK	RN.SS
							REIRYYQKSTELLIRK	RN.SS
							REIVRYQKSTELLIRK	RN.SS
							REIHRYQKSTELLIRK	RN.SS
							RKIRRYQKSTELLIRK	RN.SS
							REI_RYQKSTELLIRK	RN.SS
							RWIRRYQKSTELLIRK	RN.SS
							RENRRYQKSTELLIRK	RN.SS
							IEIRRYQKSTELLIRK	RN.SS
							REITRYQKSTELLIRK	RN.SS
							RDIRRYQKSTELLIRK	RN.SS
							RSIRRYQKSTELLIRK	RN.SS
							REARRYQKSTELLIRK	RN.SS
							REINRYQKSTELLIRK	RN.SS
							REIPRYQKSTELLIRK	RN.SS
							RAIRRYQKSTELLIRK	RN.SS
							RNIRRYQKSTELLIRK	RN.SS
							REIKRYQKSTELLIRK	RN.SS
							REIRTYQKSTELLIRK	RN.SS
							REIARYQKSTELLIRK	RN.SS
							REIRGYQKSTELLIRK	RN.SS
							REDRRYQKSTELLIRK	RN.SS
							REKRRYQKSTELLIRK	RN.SS
							REYRRYQKSTELLIRK	RN.SS
							GEIRRYQKSTELLIRK	RN.SS
							RE_RRYQKSTELLIRK	RN.SS
							REIIRYQKSTELLIRK	RN.SS
							VEIRRYQKSTELLIRK	RN.SS
							RQIRRYQKSTELLIRK	RN.SS
							REIRKYQKSTELLIRK	RN.SS
							DEIRRYQKSTELLIRK	RN.SS
							REIRRYQKSTELLIRK	RN.SS
							RERRRYQKSTELLIRK	RN.SS
							EEIRRYQKSTELLIRK	RN.SS
							R_IRRYQKSTELLIRK	RN.SS
							FEIRRYQKSTELLIRK	RN.SS
							REERRYQKSTELLIRK	RN.SS
							REIERYQKSTELLIRK	RN.SS
							RFIRRYQKSTELLIRK	RN.SS
							AEIRRYQKSTELLIRK	RN.SS
							YEIRRYQKSTELLIRK	RN.SS
							TEIRRYQKSTELLIRK	RN.SS
							REQRRYQKSTELLIRK	RN.SS
							REIQRYQKSTELLIRK	RN.SS
							REIWRYQKSTELLIRK	RN.SS
							RHIRRYQKSTELLIRK	RN.SS
							REIRPYQKSTELLIRK	RN.SS
							REHRRYQKSTELLIRK	RN.SS
							REIREYQKSTELLIRK	RN.SS
							REIRVYQKSTELLIRK	RN.SS

## Sheet: Acetylated Peptides
Acetylated peptides
Column2	Column3	Column4	Column5	Column6		Labelling guide
SEQUENCE	Label	SCR_60416	SCR_61075	SCR_61098		HEL.IL = helical (HEL) 15aa
__	Label	Mab-3D9-1 @ 0.5 ug/ml	Mab-3D9-1 @ 0.02 ug/ml	\IgG,k @ 0.02 ug/ml\""		HEL.IL9 = helical 9aa
__	dilution	\0,5ug/ml\""	\0,02ug/ml\""	\0,02ug/ml \""		LIN8 = Linear 8aa
__	preconditioning	10%SQ	10%SQ	10%SQ		LIN15 = linear 15aa
__	samplebuffer	10%SQ	10%SQ	10%SQ		RN.SS = replacement analysis - linear
__	conjugate	a-mouse 1000x	rab-a-mouse 1000x	Rab-a-mouse 1000x		RN.HEL = replacement analysis - helical
GTVALIEILRYQISL	HEL.IL	696	62	33
GVKKPIRYLPGTIAL	HEL.IL	399	62	35
QKSTEILILKLPIQL	HEL.IL	344	56	38
VALREIRRLQKSIEL	HEL.IL	2982	1750	34
EIRRYIKSLELLIRL	HEL.IL	1316	74	37
LREIRIYQLSTEILL	HEL.IL	160	48	23
PGTVAIRELRRYIKL	HEL.IL	725	66	23
REIRRIQKLTELIIL	HEL.IL	2978	1936	23
KPHRYIPGLVALIEL	HEL.IL	292	48	6
KSTELIIRLLPFIRL	HEL.IL	107	37	12
TVALRIIRLYQKITL	HEL.IL	283	49	33
RRYQKITELLIRILL	HEL.IL	113	47	31
ALREIIRYLKSTILL	HEL.IL	2539	159	36
IRRYQISTLLLIIKL	HEL.IL	295	51	30
PATGGIKKLHRYIPL	HEL.IL	1253	98	33
RPGTVILRLIRRIQL	HEL.IL	1328	105	37
GGVKKIHRLRPGIVL	HEL.IL	701	64	31
HRYRPITVLLREIRL	HEL.IL	2980	1219	44
TGGVKIPHLYRPITL	HEL.IL	153	56	22
YRPGTIALLEIRIYL	HEL.IL	130	79	30
PHRYRIGTLALRIIL	HEL.IL	134	60	22
YQKSTILLLRKLIFL	HEL.IL	136	54	5
ATGGVIKPLRYRIGL	HEL.IL	1777	133	5
VKKPHIYRLGTVILL	HEL.IL	277	49	32
RYQKSIELLIRKIPL	HEL.IL	2289	166	26
KKPHRIRPLTVAIRL	HEL.IL	147	51	24
RYRPGIVALREIIRL	HEL.IL	2856	481	18
PATGGIKKL	HEL.IL9	540	76	40
YQKSTILLL	HEL.IL9	125	45	34
TVALRIIRL	HEL.IL9	409	56	31
KKPHRIRPL	HEL.IL9	1756	124	36
RPGTVILRL	HEL.IL9	192	68	35
VKKPHIYRL	HEL.IL9	580	80	42
RRYQKITEL	HEL.IL9	367	62	17
LLIRKIPFL	HEL.IL9	396	71	29
ATGGVIKPL	HEL.IL9	309	61	29
GVKKPIRYL	HEL.IL9	646	113	25
GTVALIEIL	HEL.IL9	139	60	30
GGVKKIHRL	HEL.IL9	1777	135	37
ELLIRILPL	HEL.IL9	142	60	35
RYRPGIVAL	HEL.IL9	156	53	28
KPHRYIPGL	HEL.IL9	179	60	22
PGTVAIREL	HEL.IL9	113	45	27
REIRRIQKL	HEL.IL9	2976	2187	17
TGGVKIPHL	HEL.IL9	1930	894	41
STELLIRKL	HEL.IL9	1243	80	37
HRYRPITVL	HEL.IL9	182	66	44
PHRYRIGTL	HEL.IL9	2406	209	37
QKSTEILIL	HEL.IL9	579	117	30
IRKLPIQRL	HEL.IL9	1656	154	33
LREIRIYQL	HEL.IL9	686	84	35
TELLIIKLL	HEL.IL9	234	92	36
YRPGTIALL	HEL.IL9	399	97	50
VALREIRRL	HEL.IL9	3005	2340	43
EIRRYIKSL	HEL.IL9	2992	1539	40
LIRKLIFQL	HEL.IL9	293	72	26
RYQKSIELL	HEL.IL9	433	73	28
ALREIIRYL	HEL.IL9	2679	245	47
KSTELIIRL	HEL.IL9	299	68	50
IRRYQISTL	HEL.IL9	700	76	23
TEIRRIQKLTELIIL	RN.HEL	2943	776	19
REIPRIQKLTELIIL	RN.HEL	2976	2064	49
REIRTIQKLTELIIL	RN.HEL	2476	184	58
REIRDIQKLTELIIL	RN.HEL	1205	93	52
REDRRIQKLTELIIL	RN.HEL	356	85	54
REIRRIQKLTELIIL	RN.HEL	3010	2709	59
REYRRIQKLTELIIL	RN.HEL	296	82	52
REIHRIQKLTELIIL	RN.HEL	3005	2202	59
SEIRRIQKLTELIIL	RN.HEL	2996	1004	52
REIGRIQKLTELIIL	RN.HEL	3016	2296	44
REVRRIQKLTELIIL	RN.HEL	2980	880	41
REIRHIQKLTELIIL	RN.HEL	2527	431	30
RSIRRIQKLTELIIL	RN.HEL	1763	175	36
GEIRRIQKLTELIIL	RN.HEL	2994	1475	42
RNIRRIQKLTELIIL	RN.HEL	1169	200	18
QEIRRIQKLTELIIL	RN.HEL	2932	942	47
RFIRRIQKLTELIIL	RN.HEL	746	177	25
REIRWIQKLTELIIL	RN.HEL	923	94	23
REIRRIQKLTELIIL	RN.HEL	2973	2492	48
RGIRRIQKLTELIIL	RN.HEL	1466	226	51
RIIRRIQKLTELIIL	RN.HEL	1676	325	52
REIRSIQKLTELIIL	RN.HEL	2914	595	57
RENRRIQKLTELIIL	RN.HEL	2610	1656	56
REPRRIQKLTELIIL	RN.HEL	2005	754	64
REIRIIQKLTELIIL	RN.HEL	1910	151	68
RHIRRIQKLTELIIL	RN.HEL	1563	217	57
RESRRIQKLTELIIL	RN.HEL	2169	515	41
RRIRRIQKLTELIIL	RN.HEL	2540	770	37
WEIRRIQKLTELIIL	RN.HEL	2747	776	43
RQIRRIQKLTELIIL	RN.HEL	3000	1485	40
RWIRRIQKLTELIIL	RN.HEL	1787	418	41
REIRPIQKLTELIIL	RN.HEL	1554	154	30
REARRIQKLTELIIL	RN.HEL	513	78	27
REGRRIQKLTELIIL	RN.HEL	327	89	35
REIKRIQKLTELIIL	RN.HEL	3027	2467	28
REIARIQKLTELIIL	RN.HEL	2976	2756	49
RYIRRIQKLTELIIL	RN.HEL	2452	1025	61
PEIRRIQKLTELIIL	RN.HEL	2999	2147	65
RERRRIQKLTELIIL	RN.HEL	1597	605	59
REERRIQKLTELIIL	RN.HEL	247	85	51
REIRYIQKLTELIIL	RN.HEL	2445	374	60
REI_RIQKLTELIIL	RN.HEL	2163	84	48
REIREIQKLTELIIL	RN.HEL	2137	215	34
VEIRRIQKLTELIIL	RN.HEL	3004	1709	38
HEIRRIQKLTELIIL	RN.HEL	3022	2184	43
IEIRRIQKLTELIIL	RN.HEL	2984	917	37
REIDRIQKLTELIIL	RN.HEL	3019	2371	34
REIIRIQKLTELIIL	RN.HEL	3001	1475	43
REIRVIQKLTELIIL	RN.HEL	2644	585	33
REIRRIQKLTELIIL	RN.HEL	3009	2537	34
_EIRRIQKLTELIIL	RN.HEL	2867	609	32
RKIRRIQKLTELIIL	RN.HEL	1616	368	21
RTIRRIQKLTELIIL	RN.HEL	1831	489	34
YEIRRIQKLTELIIL	RN.HEL	2944	1677	64
REIRQIQKLTELIIL	RN.HEL	2989	1629	64
RAIRRIQKLTELIIL	RN.HEL	1390	151	54
REKRRIQKLTELIIL	RN.HEL	1781	327	50
REISRIQKLTELIIL	RN.HEL	3022	2808	48
REIRRIQKLTELIIL	RN.HEL	3024	2696	47
REIRRIQKLTELIIL	RN.HEL	3024	2734	44
REIRAIQKLTELIIL	RN.HEL	2827	977	36
REIRNIQKLTELIIL	RN.HEL	1730	176	40
REIERIQKLTELIIL	RN.HEL	3019	2421	37
REIQRIQKLTELIIL	RN.HEL	3021	2661	39
RPIRRIQKLTELIIL	RN.HEL	2527	963	38
REIYRIQKLTELIIL	RN.HEL	2894	522	37
NEIRRIQKLTELIIL	RN.HEL	3006	716	37
REITRIQKLTELIIL	RN.HEL	3012	2270	39
R_IRRIQKLTELIIL	RN.HEL	2111	446	27
KEIRRIQKLTELIIL	RN.HEL	2958	2902	63
AEIRRIQKLTELIIL	RN.HEL	2993	2071	59
REIFRIQKLTELIIL	RN.HEL	2997	1415	70
REINRIQKLTELIIL	RN.HEL	3011	2822	51
EEIRRIQKLTELIIL	RN.HEL	2699	709	42
RVIRRIQKLTELIIL	RN.HEL	2812	1674	37
RE_RRIQKLTELIIL	RN.HEL	341	63	42
FEIRRIQKLTELIIL	RN.HEL	2971	1299	42
REHRRIQKLTELIIL	RN.HEL	470	111	33
REFRRIQKLTELIIL	RN.HEL	772	109	41
REIRGIQKLTELIIL	RN.HEL	1640	164	38
REIRKIQKLTELIIL	RN.HEL	3024	2374	39
REQRRIQKLTELIIL	RN.HEL	695	174	37
REIR_IQKLTELIIL	RN.HEL	2008	148	39
REIVRIQKLTELIIL	RN.HEL	3016	2093	37
DEIRRIQKLTELIIL	RN.HEL	2652	189	33
RETRRIQKLTELIIL	RN.HEL	2493	799	33
REIWRIQKLTELIIL	RN.HEL	2960	945	59
REIRFIQKLTELIIL	RN.HEL	1256	113	60
RDIRRIQKLTELIIL	RN.HEL	912	151	58
REWRRIQKLTELIIL	RN.HEL	2524	1174	50
PATGGVKKPHRYRPG	LIN15	1393	126	56
LREIRRYQKSTELLI	LIN15	2820	485	56
RYRPGTVALREIRRY	LIN15	3011	1871	50
RYQKSTELLIRKLPF	LIN15	1716	357	43
YQKSTELLIRKLPFQ	LIN15	1234	123	35
RPGTVALREIRRYQK	LIN15	2996	2062	37
RRYQKSTELLIRKLP	LIN15	2691	1241	44
VALREIRRYQKSTEL	LIN15	3016	2128	46
QKSTELLIRKLPFQR	LIN15	951	120	39
ALREIRRYQKSTELL	LIN15	3007	1659	39
TVALREIRRYQKSTE	LIN15	2989	1801	13
REIRRYQKSTELLIR	LIN15	3020	2715	40
KSTELLIRKLPFQRL	LIN15	691	94	14
KKPHRYRPGTVALRE	LIN15	180	71	57
IRRYQKSTELLIRKL	LIN15	1064	114	53
YRPGTVALREIRRYQ	LIN15	2959	1955	63
GGVKKPHRYRPGTVA	LIN15	2869	311	34
EIRRYQKSTELLIRK	LIN15	2909	625	49
PGTVALREIRRYQKS	LIN15	3001	2145	54
VKKPHRYRPGTVALR	LIN15	906	119	37
GTVALREIRRYQKST	LIN15	2984	1367	45
KPHRYRPGTVALREI	LIN15	470	110	41
ATGGVKKPHRYRPGT	LIN15	1240	122	43
PHRYRPGTVALREIR	LIN15	2706	313	52
HRYRPGTVALREIRR	LIN15	3009	2730	42
TGGVKKPHRYRPGTV	LIN15	433	100	31
GVKKPHRYRPGTVAL	LIN15	1646	260	32
GGVKKPHR	LIN8	943	121	29
PATGGVKK	LIN8	2450	1223	33
VKKPHRYR	LIN8	344	78	24
PHRYRPGT	LIN8	110	90	58
IRRYQKST	LIN8	1423	133	57
ELLIRKLP	LIN8	1513	135	63
ALREIRRY	LIN8	2966	1485	67
TGGVKKPH	LIN8	1287	149	45
STELLIRK	LIN8	2725	270	34
RPGTVALR	LIN8	482	111	36
RRYQKSTE	LIN8	2935	2469	54
KSTELLIR	LIN8	253	111	39
GVKKPHRY	LIN8	2092	237	42
KKPHRYRP	LIN8	1914	200	39
YQKSTELL	LIN8	176	95	27
RYQKSTEL	LIN8	287	90	37
ATGGVKKP	LIN8	240	104	33
RKLPFQRL	LIN8	477	97	23
YRPGTVAL	LIN8	490	99	38
PGTVALRE	LIN8	207	75	32
TVALREIR	LIN8	2346	169	46
IRKLPFQR	LIN8	1502	137	46
HRYRPGTV	LIN8	303	99	68
VALREIRR	LIN8	3008	2872	71
TELLIRKL	LIN8	2600	862	54
LIRKLPFQ	LIN8	2396	273	47
LLIRKLPF	LIN8	2971	2405	56
RYRPGTVA	LIN8	2747	996	44
REIRRYQK	LIN8	3006	2566	52
EIRRYQKS	LIN8	3002	2438	51
GTVALREI	LIN8	627	124	36
QKSTELLI	LIN8	450	98	30
KPHRYRPG	LIN8	475	103	40
LREIRRYQ	LIN8	2997	1714	30
QEIRRYQKSTELLIRK	RN.SS	2996	882	31
REIRAYQKSTELLIRK	RN.SS	3011	1879	33
NEIRRYQKSTELLIRK	RN.SS	2996	1505	31
REIRQYQKSTELLIRK	RN.SS	2987	2748	63
REVRRYQKSTELLIRK	RN.SS	2973	1771	72
HEIRRYQKSTELLIRK	RN.SS	2990	2325	69
REIRRYQKSTELLIRK	RN.SS	2991	2866	66
REIR_YQKSTELLIRK	RN.SS	2993	1991	61
REIRFYQKSTELLIRK	RN.SS	2987	1328	32
REIGRYQKSTELLIRK	RN.SS	3015	2759	45
REIFRYQKSTELLIRK	RN.SS	3005	2509	40
REIRRYQKSTELLIRK	RN.SS	3012	2795	44
RRIRRYQKSTELLIRK	RN.SS	3005	2539	40
_EIRRYQKSTELLIRK	RN.SS	2882	439	35
REFRRYQKSTELLIRK	RN.SS	2229	168	33
RVIRRYQKSTELLIRK	RN.SS	2262	270	31
REIYRYQKSTELLIRK	RN.SS	3003	1243	41
RESRRYQKSTELLIRK	RN.SS	3008	2471	32
RGIRRYQKSTELLIRK	RN.SS	3010	2255	28
REIDRYQKSTELLIRK	RN.SS	3007	2356	38
REIRIYQKSTELLIRK	RN.SS	2946	1835	53
PEIRRYQKSTELLIRK	RN.SS	2996	2514	67
REIRHYQKSTELLIRK	RN.SS	2984	1555	71
SEIRRYQKSTELLIRK	RN.SS	3005	2741	68
REIRSYQKSTELLIRK	RN.SS	2999	2030	61
RYIRRYQKSTELLIRK	RN.SS	3002	2876	56
REWRRYQKSTELLIRK	RN.SS	3017	2844	47
REISRYQKSTELLIRK	RN.SS	3017	2829	48
REIRNYQKSTELLIRK	RN.SS	2939	744	34
REIRRYQKSTELLIRK	RN.SS	3020	2746	37
REIRWYQKSTELLIRK	RN.SS	3008	2453	42
RETRRYQKSTELLIRK	RN.SS	3007	2167	32
RIIRRYQKSTELLIRK	RN.SS	3010	2587	34
WEIRRYQKSTELLIRK	RN.SS	2893	481	39
REIRDYQKSTELLIRK	RN.SS	2971	758	24
REPRRYQKSTELLIRK	RN.SS	3012	2273	27
RTIRRYQKSTELLIRK	RN.SS	3003	2336	34
REIRRYQKSTELLIRK	RN.SS	2979	2929	47
KEIRRYQKSTELLIRK	RN.SS	2991	2918	66
REGRRYQKSTELLIRK	RN.SS	2616	300	58
RPIRRYQKSTELLIRK	RN.SS	3004	2843	65
REIRYYQKSTELLIRK	RN.SS	2997	1440	64
REIVRYQKSTELLIRK	RN.SS	3013	2890	48
REIHRYQKSTELLIRK	RN.SS	3011	2646	47
RKIRRYQKSTELLIRK	RN.SS	3011	2854	29
REI_RYQKSTELLIRK	RN.SS	2842	296	33
RWIRRYQKSTELLIRK	RN.SS	3014	2781	44
RENRRYQKSTELLIRK	RN.SS	3013	2663	41
IEIRRYQKSTELLIRK	RN.SS	2999	1636	26
REITRYQKSTELLIRK	RN.SS	3015	2551	32
RDIRRYQKSTELLIRK	RN.SS	1834	144	22
RSIRRYQKSTELLIRK	RN.SS	1591	133	26
REARRYQKSTELLIRK	RN.SS	1783	174	33
REINRYQKSTELLIRK	RN.SS	3014	2571	23
REIPRYQKSTELLIRK	RN.SS	2965	2916	66
RAIRRYQKSTELLIRK	RN.SS	2502	224	59
RNIRRYQKSTELLIRK	RN.SS	2401	197	52
REIKRYQKSTELLIRK	RN.SS	3002	2929	61
REIRTYQKSTELLIRK	RN.SS	2988	1768	63
REIARYQKSTELLIRK	RN.SS	3005	2939	58
REIRGYQKSTELLIRK	RN.SS	2963	739	38
REDRRYQKSTELLIRK	RN.SS	2727	351	33
REKRRYQKSTELLIRK	RN.SS	2987	2313	31
REYRRYQKSTELLIRK	RN.SS	3007	2751	35
GEIRRYQKSTELLIRK	RN.SS	3011	2022	31
RE_RRYQKSTELLIRK	RN.SS	2297	160	34
REIIRYQKSTELLIRK	RN.SS	3012	2349	36
VEIRRYQKSTELLIRK	RN.SS	2999	1927	29
RQIRRYQKSTELLIRK	RN.SS	2992	1692	31
REIRKYQKSTELLIRK	RN.SS	3011	2433	21
DEIRRYQKSTELLIRK	RN.SS	2949	626	20
REIRRYQKSTELLIRK	RN.SS	2941	2920	68
RERRRYQKSTELLIRK	RN.SS	2532	235	60
EEIRRYQKSTELLIRK	RN.SS	2968	1639	75
R_IRRYQKSTELLIRK	RN.SS	2728	326	58
FEIRRYQKSTELLIRK	RN.SS	2992	2514	57
REERRYQKSTELLIRK	RN.SS	2673	317	54
REIERYQKSTELLIRK	RN.SS	3010	2892	43
RFIRRYQKSTELLIRK	RN.SS	3001	2645	56
AEIRRYQKSTELLIRK	RN.SS	3002	2657	47
YEIRRYQKSTELLIRK	RN.SS	2978	2042	39
TEIRRYQKSTELLIRK	RN.SS	2995	2108	38
REQRRYQKSTELLIRK	RN.SS	2261	165	31
REIQRYQKSTELLIRK	RN.SS	3006	2541	41
REIWRYQKSTELLIRK	RN.SS	2996	2067	32
RHIRRYQKSTELLIRK	RN.SS	1321	125	23
REIRPYQKSTELLIRK	RN.SS	2975	1336	35
REHRRYQKSTELLIRK	RN.SS	2606	303	17
REIREYQKSTELLIRK	RN.SS	2915	1627	66
REIRVYQKSTELLIRK	RN.SS	2965	1892	57

## Sheet: non-acetylated peptides
Non-acetylated peptides
Column2	Column3	Column4	Column5	Column6
SEQUENCE	Label	SCR_60416	SCR_61075	SCR_61098		Labelling guide
__	Label	Mab-3D9-1 @ 0.5 ug/ml	Mab-3D9-1 @ 0.02 ug/ml	\IgG,k @ 0.02 ug/ml\""		HEL.IL = helical (HEL) 15aa
__	dilution	\0,5ug/ml\""	\0,02ug/ml\""	\0,02ug/ml \""		HEL.IL9 = helical 9aa
__	preconditioning	10%SQ	10%SQ	10%SQ		LIN8 = Linear 8aa
__	samplebuffer	10%SQ	10%SQ	10%SQ		LIN15 = linear 15aa
__	conjugate	a-mouse 1000x	rab-a-mouse 1000x	Rab-a-mouse 1000x		RN.SS = replacement analysis - linear
GTVALIEILRYQISL	HEL.IL	841	82	50		RN.HEL = replacement analysis - helical
GVKKPIRYLPGTIAL	HEL.IL	487	105	63
QKSTEILILKLPIQL	HEL.IL	520	77	64
VALREIRRLQKSIEL	HEL.IL	3012	2113	71
EIRRYIKSLELLIRL	HEL.IL	2468	107	62
LREIRIYQLSTEILL	HEL.IL	211	54	49
PGTVAIRELRRYIKL	HEL.IL	723	94	52
REIRRIQKLTELIIL	HEL.IL	3015	2675	61
KPHRYIPGLVALIEL	HEL.IL	102	61	35
KSTELIIRLLPFIRL	HEL.IL	131	63	43
TVALRIIRLYQKITL	HEL.IL	177	55	46
RRYQKITELLIRILL	HEL.IL	139	41	44
ALREIIRYLKSTILL	HEL.IL	2764	216	50
IRRYQISTLLLIIKL	HEL.IL	355	62	47
PATGGIKKLHRYIPL	HEL.IL	1117	114	52
RPGTVILRLIRRIQL	HEL.IL	611	90	54
GGVKKIHRLRPGIVL	HEL.IL	811	83	65
HRYRPITVLLREIRL	HEL.IL	2996	784	74
TGGVKIPHLYRPITL	HEL.IL	227	87	70
YRPGTIALLEIRIYL	HEL.IL	213	91	55
PHRYRIGTLALRIIL	HEL.IL	225	89	62
YQKSTILLLRKLIFL	HEL.IL	403	70	61
ATGGVIKPLRYRIGL	HEL.IL	1092	115	52
VKKPHIYRLGTVILL	HEL.IL	154	80	60
RYQKSIELLIRKIPL	HEL.IL	2576	215	60
KKPHRIRPLTVAIRL	HEL.IL	161	80	48
RYRPGIVALREIIRL	HEL.IL	2900	365	59
PATGGIKKL	HEL.IL9	712	81	44
YQKSTILLL	HEL.IL9	139	67	70
TVALRIIRL	HEL.IL9	235	76	58
KKPHRIRPL	HEL.IL9	1443	161	60
RPGTVILRL	HEL.IL9	462	97	50
VKKPHIYRL	HEL.IL9	580	102	70
RRYQKITEL	HEL.IL9	469	84	75
LLIRKIPFL	HEL.IL9	468	95	67
ATGGVIKPL	HEL.IL9	348	115	60
GVKKPIRYL	HEL.IL9	2063	449	63
GTVALIEIL	HEL.IL9	220	91	69
GGVKKIHRL	HEL.IL9	659	107	61
ELLIRILPL	HEL.IL9	199	92	81
RYRPGIVAL	HEL.IL9	244	82	66
KPHRYIPGL	HEL.IL9	208	92	61
PGTVAIREL	HEL.IL9	138	81	57
REIRRIQKL	HEL.IL9	3022	2206	53
TGGVKIPHL	HEL.IL9	759	159	48
STELLIRKL	HEL.IL9	942	105	74
HRYRPITVL	HEL.IL9	305	91	79
PHRYRIGTL	HEL.IL9	2792	440	71
QKSTEILIL	HEL.IL9	2620	1668	68
IRKLPIQRL	HEL.IL9	2918	1062	82
LREIRIYQL	HEL.IL9	2237	523	77
TELLIIKLL	HEL.IL9	939	206	72
YRPGTIALL	HEL.IL9	2836	1765	85
VALREIRRL	HEL.IL9	3022	2805	83
EIRRYIKSL	HEL.IL9	2991	1572	92
LIRKLIFQL	HEL.IL9	2308	211	73
RYQKSIELL	HEL.IL9	889	198	67
ALREIIRYL	HEL.IL9	2297	177	84
KSTELIIRL	HEL.IL9	273	96	75
IRRYQISTL	HEL.IL9	1057	123	56
TEIRRIQKLTELIIL	RN.HEL	2991	1262	60
REIPRIQKLTELIIL	RN.HEL	3004	2814	50
REIRTIQKLTELIIL	RN.HEL	2976	482	61
REIRDIQKLTELIIL	RN.HEL	2633	218	66
REDRRIQKLTELIIL	RN.HEL	713	89	88
REIRRIQKLTELIIL	RN.HEL	3015	2923	87
REYRRIQKLTELIIL	RN.HEL	594	127	83
REIHRIQKLTELIIL	RN.HEL	3022	2876	81
SEIRRIQKLTELIIL	RN.HEL	3031	2613	78
REIGRIQKLTELIIL	RN.HEL	3033	2751	75
REVRRIQKLTELIIL	RN.HEL	3030	2698	84
REIRHIQKLTELIIL	RN.HEL	2899	424	76
RSIRRIQKLTELIIL	RN.HEL	1606	157	66
GEIRRIQKLTELIIL	RN.HEL	3025	2414	85
RNIRRIQKLTELIIL	RN.HEL	1084	102	53
QEIRRIQKLTELIIL	RN.HEL	2955	276	79
RFIRRIQKLTELIIL	RN.HEL	318	106	75
REIRWIQKLTELIIL	RN.HEL	2437	336	69
REIRRIQKLTELIIL	RN.HEL	3002	2868	63
RGIRRIQKLTELIIL	RN.HEL	2154	152	62
RIIRRIQKLTELIIL	RN.HEL	2930	1566	88
REIRSIQKLTELIIL	RN.HEL	3004	2344	91
RENRRIQKLTELIIL	RN.HEL	392	86	79
REPRRIQKLTELIIL	RN.HEL	2885	1400	92
REIRIIQKLTELIIL	RN.HEL	2937	448	77
RHIRRIQKLTELIIL	RN.HEL	2925	1986	71
RESRRIQKLTELIIL	RN.HEL	3033	2664	77
RRIRRIQKLTELIIL	RN.HEL	3013	2163	69
WEIRRIQKLTELIIL	RN.HEL	3025	2348	77
RQIRRIQKLTELIIL	RN.HEL	3023	2201	75
RWIRRIQKLTELIIL	RN.HEL	2757	1549	85
REIRPIQKLTELIIL	RN.HEL	2427	313	91
REARRIQKLTELIIL	RN.HEL	1039	107	73
REGRRIQKLTELIIL	RN.HEL	635	119	64
REIKRIQKLTELIIL	RN.HEL	2992	2682	67
REIARIQKLTELIIL	RN.HEL	3008	2858	64
RYIRRIQKLTELIIL	RN.HEL	1299	183	89
PEIRRIQKLTELIIL	RN.HEL	3017	2683	87
RERRRIQKLTELIIL	RN.HEL	3009	2780	96
REERRIQKLTELIIL	RN.HEL	320	69	79
REIRYIQKLTELIIL	RN.HEL	3013	2531	90
REI_RIQKLTELIIL	RN.HEL	2959	506	83
REIREIQKLTELIIL	RN.HEL	2313	379	66
VEIRRIQKLTELIIL	RN.HEL	3029	2681	77
HEIRRIQKLTELIIL	RN.HEL	3022	1730	78
IEIRRIQKLTELIIL	RN.HEL	3004	1442	67
REIDRIQKLTELIIL	RN.HEL	3035	2784	77
REIIRIQKLTELIIL	RN.HEL	3008	2112	86
REIRVIQKLTELIIL	RN.HEL	2997	1305	92
REIRRIQKLTELIIL	RN.HEL	3034	2609	90
_EIRRIQKLTELIIL	RN.HEL	2756	926	46
RKIRRIQKLTELIIL	RN.HEL	2844	1636	61
RTIRRIQKLTELIIL	RN.HEL	2797	1618	51
YEIRRIQKLTELIIL	RN.HEL	3004	2644	72
REIRQIQKLTELIIL	RN.HEL	3014	2300	77
RAIRRIQKLTELIIL	RN.HEL	1787	159	75
REKRRIQKLTELIIL	RN.HEL	2500	908	63
REISRIQKLTELIIL	RN.HEL	3017	2908	73
REIRRIQKLTELIIL	RN.HEL	3022	2838	73
REIRRIQKLTELIIL	RN.HEL	3022	2800	84
REIRAIQKLTELIIL	RN.HEL	2547	445	69
REIRNIQKLTELIIL	RN.HEL	2222	308	69
REIERIQKLTELIIL	RN.HEL	3020	2398	70
REIQRIQKLTELIIL	RN.HEL	3032	2811	77
RPIRRIQKLTELIIL	RN.HEL	3002	2234	81
REIYRIQKLTELIIL	RN.HEL	2959	1186	60
NEIRRIQKLTELIIL	RN.HEL	3024	1806	77
REITRIQKLTELIIL	RN.HEL	3039	2690	74
R_IRRIQKLTELIIL	RN.HEL	1486	367	66
KEIRRIQKLTELIIL	RN.HEL	2995	2913	73
AEIRRIQKLTELIIL	RN.HEL	2990	2697	60
REIFRIQKLTELIIL	RN.HEL	3018	2348	69
REINRIQKLTELIIL	RN.HEL	3009	2844	76
EEIRRIQKLTELIIL	RN.HEL	2988	1009	88
RVIRRIQKLTELIIL	RN.HEL	2992	2606	70
RE_RRIQKLTELIIL	RN.HEL	558	147	67
FEIRRIQKLTELIIL	RN.HEL	3001	1749	81
REHRRIQKLTELIIL	RN.HEL	530	126	77
REFRRIQKLTELIIL	RN.HEL	903	143	76
REIRGIQKLTELIIL	RN.HEL	2460	411	70
REIRKIQKLTELIIL	RN.HEL	3030	2703	79
REQRRIQKLTELIIL	RN.HEL	2782	1408	82
REIR_IQKLTELIIL	RN.HEL	2754	584	80
REIVRIQKLTELIIL	RN.HEL	3024	2611	82
DEIRRIQKLTELIIL	RN.HEL	2993	651	69
RETRRIQKLTELIIL	RN.HEL	2763	853	67
REIWRIQKLTELIIL	RN.HEL	2991	1775	64
REIRFIQKLTELIIL	RN.HEL	2779	798	58
RDIRRIQKLTELIIL	RN.HEL	1479	174	66
REWRRIQKLTELIIL	RN.HEL	2862	1840	65
PATGGVKKPHRYRPG	LIN15	853	143	58
LREIRRYQKSTELLI	LIN15	2959	664	81
RYRPGTVALREIRRY	LIN15	3000	1031	75
RYQKSTELLIRKLPF	LIN15	2693	1853	77
YQKSTELLIRKLPFQ	LIN15	709	131	88
RPGTVALREIRRYQK	LIN15	1047	226	60
RRYQKSTELLIRKLP	LIN15	2481	710	85
VALREIRRYQKSTEL	LIN15	2902	1165	87
QKSTELLIRKLPFQR	LIN15	1031	147	75
ALREIRRYQKSTELL	LIN15	3003	1329	78
TVALREIRRYQKSTE	LIN15	3003	1640	90
REIRRYQKSTELLIR	LIN15	3030	2634	74
KSTELLIRKLPFQRL	LIN15	933	136	60
KKPHRYRPGTVALRE	LIN15	160	72	59
IRRYQKSTELLIRKL	LIN15	2030	375	80
YRPGTVALREIRRYQ	LIN15	2923	734	75
GGVKKPHRYRPGTVA	LIN15	2554	256	75
EIRRYQKSTELLIRK	LIN15	2883	619	81
PGTVALREIRRYQKS	LIN15	3000	1346	80
VKKPHRYRPGTVALR	LIN15	1276	147	68
GTVALREIRRYQKST	LIN15	2710	454	65
KPHRYRPGTVALREI	LIN15	367	124	74
ATGGVKKPHRYRPGT	LIN15	2973	1603	89
PHRYRPGTVALREIR	LIN15	240	188	60
HRYRPGTVALREIRR	LIN15	3009	2445	93
TGGVKKPHRYRPGTV	LIN15	589	124	82
GVKKPHRYRPGTVAL	LIN15	2584	833	80
GGVKKPHR	LIN8	713	140	72
PATGGVKK	LIN8	2291	1064	62
VKKPHRYR	LIN8	884	145	53
PHRYRPGT	LIN8	223	83	71
IRRYQKST	LIN8	1359	156	77
ELLIRKLP	LIN8	3009	2593	70
ALREIRRY	LIN8	2935	790	71
TGGVKKPH	LIN8	1457	157	59
STELLIRK	LIN8	2407	260	75
RPGTVALR	LIN8	454	126	69
RRYQKSTE	LIN8	2334	336	70
KSTELLIR	LIN8	334	168	82
GVKKPHRY	LIN8	2858	748	90
KKPHRYRP	LIN8	576	123	77
YQKSTELL	LIN8	318	111	73
RYQKSTEL	LIN8	397	119	74
ATGGVKKP	LIN8	392	124	62
RKLPFQRL	LIN8	1249	166	65
YRPGTVAL	LIN8	2783	602	73
PGTVALRE	LIN8	1841	636	65
TVALREIR	LIN8	866	110	54
IRKLPFQR	LIN8	839	132	72
HRYRPGTV	LIN8	1111	148	61
VALREIRR	LIN8	2979	2648	66
TELLIRKL	LIN8	2681	1392	66
LIRKLPFQ	LIN8	2755	554	66
LLIRKLPF	LIN8	3009	2690	78
RYRPGTVA	LIN8	886	159	76
REIRRYQK	LIN8	3023	2705	82
EIRRYQKS	LIN8	3019	2476	77
GTVALREI	LIN8	2415	266	77
QKSTELLI	LIN8	752	144	71
KPHRYRPG	LIN8	992	137	72
LREIRRYQ	LIN8	2924	730	77
QEIRRYQKSTELLIRK	RN.SS	3025	1323	73
REIRAYQKSTELLIRK	RN.SS	3035	2633	74
NEIRRYQKSTELLIRK	RN.SS	3031	2450	60
REIRQYQKSTELLIRK	RN.SS	2960	1655	40
REVRRYQKSTELLIRK	RN.SS	2950	2394	100
HEIRRYQKSTELLIRK	RN.SS	3022	2072	69
REIRRYQKSTELLIRK	RN.SS	2998	2576	74
REIR_YQKSTELLIRK	RN.SS	3025	2617	79
REIRFYQKSTELLIRK	RN.SS	3028	2683	77
REIGRYQKSTELLIRK	RN.SS	2968	1826	79
REIFRYQKSTELLIRK	RN.SS	3030	2865	71
REIRRYQKSTELLIRK	RN.SS	3025	2835	75
RRIRRYQKSTELLIRK	RN.SS	3031	2861	72
_EIRRYQKSTELLIRK	RN.SS	3005	2226	78
REFRRYQKSTELLIRK	RN.SS	2561	280	60
RVIRRYQKSTELLIRK	RN.SS	2781	468	66
REIYRYQKSTELLIRK	RN.SS	3025	2437	88
RESRRYQKSTELLIRK	RN.SS	3026	2802	73
RGIRRYQKSTELLIRK	RN.SS	3033	2786	67
REIDRYQKSTELLIRK	RN.SS	3036	2725	69
REIRIYQKSTELLIRK	RN.SS	2994	2787	64
PEIRRYQKSTELLIRK	RN.SS	3022	2928	90
REIRHYQKSTELLIRK	RN.SS	2997	2589	94
SEIRRYQKSTELLIRK	RN.SS	2959	2882	74
REIRSYQKSTELLIRK	RN.SS	3017	2722	77
RYIRRYQKSTELLIRK	RN.SS	3014	2929	74
REWRRYQKSTELLIRK	RN.SS	3037	2943	73
REISRYQKSTELLIRK	RN.SS	3038	2939	75
REIRNYQKSTELLIRK	RN.SS	3034	2325	61
REIRRYQKSTELLIRK	RN.SS	2871	702	39
REIRWYQKSTELLIRK	RN.SS	3035	2842	72
RETRRYQKSTELLIRK	RN.SS	3024	2666	72
RIIRRYQKSTELLIRK	RN.SS	3020	2663	72
WEIRRYQKSTELLIRK	RN.SS	3026	2799	91
REIRDYQKSTELLIRK	RN.SS	3020	2331	69
REPRRYQKSTELLIRK	RN.SS	3031	2770	62
RTIRRYQKSTELLIRK	RN.SS	2974	2173	58
REIRRYQKSTELLIRK	RN.SS	3004	2908	66
KEIRRYQKSTELLIRK	RN.SS	3021	2961	89
REGRRYQKSTELLIRK	RN.SS	2573	386	57
RPIRRYQKSTELLIRK	RN.SS	3001	2879	67
REIRYYQKSTELLIRK	RN.SS	3018	2241	76
REIVRYQKSTELLIRK	RN.SS	3012	2903	74
REIHRYQKSTELLIRK	RN.SS	3034	2873	94
RKIRRYQKSTELLIRK	RN.SS	3037	2881	68
REI_RYQKSTELLIRK	RN.SS	3001	776	68
RWIRRYQKSTELLIRK	RN.SS	3035	2844	72
RENRRYQKSTELLIRK	RN.SS	3032	2859	64
IEIRRYQKSTELLIRK	RN.SS	3027	2763	62
REITRYQKSTELLIRK	RN.SS	3030	2867	66
RDIRRYQKSTELLIRK	RN.SS	2506	320	76
RSIRRYQKSTELLIRK	RN.SS	3026	2760	65
REARRYQKSTELLIRK	RN.SS	2511	287	69
REINRYQKSTELLIRK	RN.SS	3028	2777	69
REIPRYQKSTELLIRK	RN.SS	3018	2890	63
RAIRRYQKSTELLIRK	RN.SS	2569	312	73
RNIRRYQKSTELLIRK	RN.SS	2122	217	67
REIKRYQKSTELLIRK	RN.SS	3019	2924	82
REIRTYQKSTELLIRK	RN.SS	3011	2527	78
REIARYQKSTELLIRK	RN.SS	3022	2938	88
REIRGYQKSTELLIRK	RN.SS	3022	2138	97
REDRRYQKSTELLIRK	RN.SS	2993	806	65
REKRRYQKSTELLIRK	RN.SS	2968	1948	68
REYRRYQKSTELLIRK	RN.SS	3033	2863	71
GEIRRYQKSTELLIRK	RN.SS	3035	2762	73
RE_RRYQKSTELLIRK	RN.SS	2664	303	64
REIIRYQKSTELLIRK	RN.SS	3029	2782	78
VEIRRYQKSTELLIRK	RN.SS	3026	2746	81
RQIRRYQKSTELLIRK	RN.SS	3022	2511	69
REIRKYQKSTELLIRK	RN.SS	3024	2802	74
DEIRRYQKSTELLIRK	RN.SS	3016	2092	71
REIRRYQKSTELLIRK	RN.SS	3017	2936	51
RERRRYQKSTELLIRK	RN.SS	2774	373	73
EEIRRYQKSTELLIRK	RN.SS	3012	2770	103
R_IRRYQKSTELLIRK	RN.SS	2460	283	72
FEIRRYQKSTELLIRK	RN.SS	3020	2857	77
REERRYQKSTELLIRK	RN.SS	2918	557	76
REIERYQKSTELLIRK	RN.SS	3028	2914	111
RFIRRYQKSTELLIRK	RN.SS	3025	2793	83
AEIRRYQKSTELLIRK	RN.SS	3028	2856	82
YEIRRYQKSTELLIRK	RN.SS	3023	1569	86
TEIRRYQKSTELLIRK	RN.SS	3024	2741	104
REQRRYQKSTELLIRK	RN.SS	2918	604	84
REIQRYQKSTELLIRK	RN.SS	3027	2847	83
REIWRYQKSTELLIRK	RN.SS	3021	2758	98
RHIRRYQKSTELLIRK	RN.SS	1933	226	68
REIRPYQKSTELLIRK	RN.SS	3006	2319	85
REHRRYQKSTELLIRK	RN.SS	2358	295	57
REIREYQKSTELLIRK	RN.SS	3009	2672	70
REIRVYQKSTELLIRK	RN.SS	3011	2886	72
