# Supplementary material for: Histone H3 clipping is a novel signature of human neutrophil extracellular traps
Source: eLife. 2022 Oct 25;11:e68283. doi: 10.7554/eLife.68283 (PMC9665850; doi:10.7554/eLife.68283)
Supplement: Figure 4—figure supplement 3—source data 1. [file elife-68283-fig4-figsupp3-data1.xlsx]

## Sheet: naming guide
	Labelling guide
	HEL.IL = helical (HEL) 15aa
	HEL.IL9 = helical 9aa
	LIN8 = Linear 8aa
	LIN15 = linear 15aa
	RN.SS = replacement analysis - linear
	RN.HEL = replacement analysis - helical

## Sheet: replacement analysis
For the the replacement analysis a summary table is provided for Figure 4-Figure supplement 4 for which the non-acetylated group is graphed.
Column2	Column3	Column4	Column5	Column6		Column2	Column3	Column4	Column5	Column6
SEQUENCE	Label	SCR_60416	SCR_61075	SCR_61098		SEQUENCE	Label	SCR_60416	SCR_61075	SCR_61098
__	Label	Mab-3D9-1 @ 0.5 ug/ml	Mab-3D9-1 @ 0.02 ug/ml	\IgG,k @ 0.02 ug/ml\""		__	Label	Mab-3D9-1 @ 0.5 ug/ml	Mab-3D9-1 @ 0.02 ug/ml	\IgG,k @ 0.02 ug/ml\""
__	dilution	\0,5ug/ml\""	\0,02ug/ml\""	\0,02ug/ml \""		__	dilution	\0,5ug/ml\""	\0,02ug/ml\""	\0,02ug/ml \""
__	preconditioning	10%SQ	10%SQ	10%SQ		__	preconditioning	10%SQ	10%SQ	10%SQ
__	samplebuffer	10%SQ	10%SQ	10%SQ		__	samplebuffer	10%SQ	10%SQ	10%SQ
__	conjugate	a-mouse 1000x	rab-a-mouse 1000x	Rab-a-mouse 1000x		__	conjugate	a-mouse 1000x	rab-a-mouse 1000x	Rab-a-mouse 1000x
Acetylated peptides						Non acetylated peptides
TEIRRIQKLTELIIL	RN.HEL	2943	776	19		TEIRRIQKLTELIIL	RN.HEL	2991	1262	60
REIPRIQKLTELIIL	RN.HEL	2976	2064	49		REIPRIQKLTELIIL	RN.HEL	3004	2814	50
REIRTIQKLTELIIL	RN.HEL	2476	184	58		REIRTIQKLTELIIL	RN.HEL	2976	482	61
REIRDIQKLTELIIL	RN.HEL	1205	93	52		REIRDIQKLTELIIL	RN.HEL	2633	218	66
REDRRIQKLTELIIL	RN.HEL	356	85	54		REDRRIQKLTELIIL	RN.HEL	713	89	88
REIRRIQKLTELIIL	RN.HEL	3010	2709	59		REIRRIQKLTELIIL	RN.HEL	3015	2923	87
REYRRIQKLTELIIL	RN.HEL	296	82	52		REYRRIQKLTELIIL	RN.HEL	594	127	83
REIHRIQKLTELIIL	RN.HEL	3005	2202	59		REIHRIQKLTELIIL	RN.HEL	3022	2876	81
SEIRRIQKLTELIIL	RN.HEL	2996	1004	52		SEIRRIQKLTELIIL	RN.HEL	3031	2613	78
REIGRIQKLTELIIL	RN.HEL	3016	2296	44		REIGRIQKLTELIIL	RN.HEL	3033	2751	75
REVRRIQKLTELIIL	RN.HEL	2980	880	41		REVRRIQKLTELIIL	RN.HEL	3030	2698	84
REIRHIQKLTELIIL	RN.HEL	2527	431	30		REIRHIQKLTELIIL	RN.HEL	2899	424	76
RSIRRIQKLTELIIL	RN.HEL	1763	175	36		RSIRRIQKLTELIIL	RN.HEL	1606	157	66
GEIRRIQKLTELIIL	RN.HEL	2994	1475	42		GEIRRIQKLTELIIL	RN.HEL	3025	2414	85
RNIRRIQKLTELIIL	RN.HEL	1169	200	18		RNIRRIQKLTELIIL	RN.HEL	1084	102	53
QEIRRIQKLTELIIL	RN.HEL	2932	942	47		QEIRRIQKLTELIIL	RN.HEL	2955	276	79
RFIRRIQKLTELIIL	RN.HEL	746	177	25		RFIRRIQKLTELIIL	RN.HEL	318	106	75
REIRWIQKLTELIIL	RN.HEL	923	94	23		REIRWIQKLTELIIL	RN.HEL	2437	336	69
REIRRIQKLTELIIL	RN.HEL	2973	2492	48		REIRRIQKLTELIIL	RN.HEL	3002	2868	63
RGIRRIQKLTELIIL	RN.HEL	1466	226	51		RGIRRIQKLTELIIL	RN.HEL	2154	152	62
RIIRRIQKLTELIIL	RN.HEL	1676	325	52		RIIRRIQKLTELIIL	RN.HEL	2930	1566	88
REIRSIQKLTELIIL	RN.HEL	2914	595	57		REIRSIQKLTELIIL	RN.HEL	3004	2344	91
RENRRIQKLTELIIL	RN.HEL	2610	1656	56		RENRRIQKLTELIIL	RN.HEL	392	86	79
REPRRIQKLTELIIL	RN.HEL	2005	754	64		REPRRIQKLTELIIL	RN.HEL	2885	1400	92
REIRIIQKLTELIIL	RN.HEL	1910	151	68		REIRIIQKLTELIIL	RN.HEL	2937	448	77
RHIRRIQKLTELIIL	RN.HEL	1563	217	57		RHIRRIQKLTELIIL	RN.HEL	2925	1986	71
RESRRIQKLTELIIL	RN.HEL	2169	515	41		RESRRIQKLTELIIL	RN.HEL	3033	2664	77
RRIRRIQKLTELIIL	RN.HEL	2540	770	37		RRIRRIQKLTELIIL	RN.HEL	3013	2163	69
WEIRRIQKLTELIIL	RN.HEL	2747	776	43		WEIRRIQKLTELIIL	RN.HEL	3025	2348	77
RQIRRIQKLTELIIL	RN.HEL	3000	1485	40		RQIRRIQKLTELIIL	RN.HEL	3023	2201	75
RWIRRIQKLTELIIL	RN.HEL	1787	418	41		RWIRRIQKLTELIIL	RN.HEL	2757	1549	85
REIRPIQKLTELIIL	RN.HEL	1554	154	30		REIRPIQKLTELIIL	RN.HEL	2427	313	91
REARRIQKLTELIIL	RN.HEL	513	78	27		REARRIQKLTELIIL	RN.HEL	1039	107	73
REGRRIQKLTELIIL	RN.HEL	327	89	35		REGRRIQKLTELIIL	RN.HEL	635	119	64
REIKRIQKLTELIIL	RN.HEL	3027	2467	28		REIKRIQKLTELIIL	RN.HEL	2992	2682	67
REIARIQKLTELIIL	RN.HEL	2976	2756	49		REIARIQKLTELIIL	RN.HEL	3008	2858	64
RYIRRIQKLTELIIL	RN.HEL	2452	1025	61		RYIRRIQKLTELIIL	RN.HEL	1299	183	89
PEIRRIQKLTELIIL	RN.HEL	2999	2147	65		PEIRRIQKLTELIIL	RN.HEL	3017	2683	87
RERRRIQKLTELIIL	RN.HEL	1597	605	59		RERRRIQKLTELIIL	RN.HEL	3009	2780	96
REERRIQKLTELIIL	RN.HEL	247	85	51		REERRIQKLTELIIL	RN.HEL	320	69	79
REIRYIQKLTELIIL	RN.HEL	2445	374	60		REIRYIQKLTELIIL	RN.HEL	3013	2531	90
REI_RIQKLTELIIL	RN.HEL	2163	84	48		REI_RIQKLTELIIL	RN.HEL	2959	506	83
REIREIQKLTELIIL	RN.HEL	2137	215	34		REIREIQKLTELIIL	RN.HEL	2313	379	66
VEIRRIQKLTELIIL	RN.HEL	3004	1709	38		VEIRRIQKLTELIIL	RN.HEL	3029	2681	77
HEIRRIQKLTELIIL	RN.HEL	3022	2184	43		HEIRRIQKLTELIIL	RN.HEL	3022	1730	78
IEIRRIQKLTELIIL	RN.HEL	2984	917	37		IEIRRIQKLTELIIL	RN.HEL	3004	1442	67
REIDRIQKLTELIIL	RN.HEL	3019	2371	34		REIDRIQKLTELIIL	RN.HEL	3035	2784	77
REIIRIQKLTELIIL	RN.HEL	3001	1475	43		REIIRIQKLTELIIL	RN.HEL	3008	2112	86
REIRVIQKLTELIIL	RN.HEL	2644	585	33		REIRVIQKLTELIIL	RN.HEL	2997	1305	92
REIRRIQKLTELIIL	RN.HEL	3009	2537	34		REIRRIQKLTELIIL	RN.HEL	3034	2609	90
_EIRRIQKLTELIIL	RN.HEL	2867	609	32		_EIRRIQKLTELIIL	RN.HEL	2756	926	46
RKIRRIQKLTELIIL	RN.HEL	1616	368	21		RKIRRIQKLTELIIL	RN.HEL	2844	1636	61
RTIRRIQKLTELIIL	RN.HEL	1831	489	34		RTIRRIQKLTELIIL	RN.HEL	2797	1618	51
YEIRRIQKLTELIIL	RN.HEL	2944	1677	64		YEIRRIQKLTELIIL	RN.HEL	3004	2644	72
REIRQIQKLTELIIL	RN.HEL	2989	1629	64		REIRQIQKLTELIIL	RN.HEL	3014	2300	77
RAIRRIQKLTELIIL	RN.HEL	1390	151	54		RAIRRIQKLTELIIL	RN.HEL	1787	159	75
REKRRIQKLTELIIL	RN.HEL	1781	327	50		REKRRIQKLTELIIL	RN.HEL	2500	908	63
REISRIQKLTELIIL	RN.HEL	3022	2808	48		REISRIQKLTELIIL	RN.HEL	3017	2908	73
REIRRIQKLTELIIL	RN.HEL	3024	2696	47		REIRRIQKLTELIIL	RN.HEL	3022	2838	73
REIRRIQKLTELIIL	RN.HEL	3024	2734	44		REIRRIQKLTELIIL	RN.HEL	3022	2800	84
REIRAIQKLTELIIL	RN.HEL	2827	977	36		REIRAIQKLTELIIL	RN.HEL	2547	445	69
REIRNIQKLTELIIL	RN.HEL	1730	176	40		REIRNIQKLTELIIL	RN.HEL	2222	308	69
REIERIQKLTELIIL	RN.HEL	3019	2421	37		REIERIQKLTELIIL	RN.HEL	3020	2398	70
REIQRIQKLTELIIL	RN.HEL	3021	2661	39		REIQRIQKLTELIIL	RN.HEL	3032	2811	77
RPIRRIQKLTELIIL	RN.HEL	2527	963	38		RPIRRIQKLTELIIL	RN.HEL	3002	2234	81
REIYRIQKLTELIIL	RN.HEL	2894	522	37		REIYRIQKLTELIIL	RN.HEL	2959	1186	60
NEIRRIQKLTELIIL	RN.HEL	3006	716	37		NEIRRIQKLTELIIL	RN.HEL	3024	1806	77
REITRIQKLTELIIL	RN.HEL	3012	2270	39		REITRIQKLTELIIL	RN.HEL	3039	2690	74
R_IRRIQKLTELIIL	RN.HEL	2111	446	27		R_IRRIQKLTELIIL	RN.HEL	1486	367	66
KEIRRIQKLTELIIL	RN.HEL	2958	2902	63		KEIRRIQKLTELIIL	RN.HEL	2995	2913	73
AEIRRIQKLTELIIL	RN.HEL	2993	2071	59		AEIRRIQKLTELIIL	RN.HEL	2990	2697	60
REIFRIQKLTELIIL	RN.HEL	2997	1415	70		REIFRIQKLTELIIL	RN.HEL	3018	2348	69
REINRIQKLTELIIL	RN.HEL	3011	2822	51		REINRIQKLTELIIL	RN.HEL	3009	2844	76
EEIRRIQKLTELIIL	RN.HEL	2699	709	42		EEIRRIQKLTELIIL	RN.HEL	2988	1009	88
RVIRRIQKLTELIIL	RN.HEL	2812	1674	37		RVIRRIQKLTELIIL	RN.HEL	2992	2606	70
RE_RRIQKLTELIIL	RN.HEL	341	63	42		RE_RRIQKLTELIIL	RN.HEL	558	147	67
FEIRRIQKLTELIIL	RN.HEL	2971	1299	42		FEIRRIQKLTELIIL	RN.HEL	3001	1749	81
REHRRIQKLTELIIL	RN.HEL	470	111	33		REHRRIQKLTELIIL	RN.HEL	530	126	77
REFRRIQKLTELIIL	RN.HEL	772	109	41		REFRRIQKLTELIIL	RN.HEL	903	143	76
REIRGIQKLTELIIL	RN.HEL	1640	164	38		REIRGIQKLTELIIL	RN.HEL	2460	411	70
REIRKIQKLTELIIL	RN.HEL	3024	2374	39		REIRKIQKLTELIIL	RN.HEL	3030	2703	79
REQRRIQKLTELIIL	RN.HEL	695	174	37		REQRRIQKLTELIIL	RN.HEL	2782	1408	82
REIR_IQKLTELIIL	RN.HEL	2008	148	39		REIR_IQKLTELIIL	RN.HEL	2754	584	80
REIVRIQKLTELIIL	RN.HEL	3016	2093	37		REIVRIQKLTELIIL	RN.HEL	3024	2611	82
DEIRRIQKLTELIIL	RN.HEL	2652	189	33		DEIRRIQKLTELIIL	RN.HEL	2993	651	69
RETRRIQKLTELIIL	RN.HEL	2493	799	33		RETRRIQKLTELIIL	RN.HEL	2763	853	67
REIWRIQKLTELIIL	RN.HEL	2960	945	59		REIWRIQKLTELIIL	RN.HEL	2991	1775	64
REIRFIQKLTELIIL	RN.HEL	1256	113	60		REIRFIQKLTELIIL	RN.HEL	2779	798	58
RDIRRIQKLTELIIL	RN.HEL	912	151	58		RDIRRIQKLTELIIL	RN.HEL	1479	174	66
REWRRIQKLTELIIL	RN.HEL	2524	1174	50		REWRRIQKLTELIIL	RN.HEL	2862	1840	65
QEIRRYQKSTELLIRK	RN.SS	2996	882	31		QEIRRYQKSTELLIRK	RN.SS	3025	1323	73
REIRAYQKSTELLIRK	RN.SS	3011	1879	33		REIRAYQKSTELLIRK	RN.SS	3035	2633	74
NEIRRYQKSTELLIRK	RN.SS	2996	1505	31		NEIRRYQKSTELLIRK	RN.SS	3031	2450	60
REIRQYQKSTELLIRK	RN.SS	2987	2748	63		REIRQYQKSTELLIRK	RN.SS	2960	1655	40
REVRRYQKSTELLIRK	RN.SS	2973	1771	72		REVRRYQKSTELLIRK	RN.SS	2950	2394	100
HEIRRYQKSTELLIRK	RN.SS	2990	2325	69		HEIRRYQKSTELLIRK	RN.SS	3022	2072	69
REIRRYQKSTELLIRK	RN.SS	2991	2866	66		REIRRYQKSTELLIRK	RN.SS	2998	2576	74
REIR_YQKSTELLIRK	RN.SS	2993	1991	61		REIR_YQKSTELLIRK	RN.SS	3025	2617	79
REIRFYQKSTELLIRK	RN.SS	2987	1328	32		REIRFYQKSTELLIRK	RN.SS	3028	2683	77
REIGRYQKSTELLIRK	RN.SS	3015	2759	45		REIGRYQKSTELLIRK	RN.SS	2968	1826	79
REIFRYQKSTELLIRK	RN.SS	3005	2509	40		REIFRYQKSTELLIRK	RN.SS	3030	2865	71
REIRRYQKSTELLIRK	RN.SS	3012	2795	44		REIRRYQKSTELLIRK	RN.SS	3025	2835	75
RRIRRYQKSTELLIRK	RN.SS	3005	2539	40		RRIRRYQKSTELLIRK	RN.SS	3031	2861	72
_EIRRYQKSTELLIRK	RN.SS	2882	439	35		_EIRRYQKSTELLIRK	RN.SS	3005	2226	78
REFRRYQKSTELLIRK	RN.SS	2229	168	33		REFRRYQKSTELLIRK	RN.SS	2561	280	60
RVIRRYQKSTELLIRK	RN.SS	2262	270	31		RVIRRYQKSTELLIRK	RN.SS	2781	468	66
REIYRYQKSTELLIRK	RN.SS	3003	1243	41		REIYRYQKSTELLIRK	RN.SS	3025	2437	88
RESRRYQKSTELLIRK	RN.SS	3008	2471	32		RESRRYQKSTELLIRK	RN.SS	3026	2802	73
RGIRRYQKSTELLIRK	RN.SS	3010	2255	28		RGIRRYQKSTELLIRK	RN.SS	3033	2786	67
REIDRYQKSTELLIRK	RN.SS	3007	2356	38		REIDRYQKSTELLIRK	RN.SS	3036	2725	69
REIRIYQKSTELLIRK	RN.SS	2946	1835	53		REIRIYQKSTELLIRK	RN.SS	2994	2787	64
PEIRRYQKSTELLIRK	RN.SS	2996	2514	67		PEIRRYQKSTELLIRK	RN.SS	3022	2928	90
REIRHYQKSTELLIRK	RN.SS	2984	1555	71		REIRHYQKSTELLIRK	RN.SS	2997	2589	94
SEIRRYQKSTELLIRK	RN.SS	3005	2741	68		SEIRRYQKSTELLIRK	RN.SS	2959	2882	74
REIRSYQKSTELLIRK	RN.SS	2999	2030	61		REIRSYQKSTELLIRK	RN.SS	3017	2722	77
RYIRRYQKSTELLIRK	RN.SS	3002	2876	56		RYIRRYQKSTELLIRK	RN.SS	3014	2929	74
REWRRYQKSTELLIRK	RN.SS	3017	2844	47		REWRRYQKSTELLIRK	RN.SS	3037	2943	73
REISRYQKSTELLIRK	RN.SS	3017	2829	48		REISRYQKSTELLIRK	RN.SS	3038	2939	75
REIRNYQKSTELLIRK	RN.SS	2939	744	34		REIRNYQKSTELLIRK	RN.SS	3034	2325	61
REIRRYQKSTELLIRK	RN.SS	3020	2746	37		REIRRYQKSTELLIRK	RN.SS	2871	702	39
REIRWYQKSTELLIRK	RN.SS	3008	2453	42		REIRWYQKSTELLIRK	RN.SS	3035	2842	72
RETRRYQKSTELLIRK	RN.SS	3007	2167	32		RETRRYQKSTELLIRK	RN.SS	3024	2666	72
RIIRRYQKSTELLIRK	RN.SS	3010	2587	34		RIIRRYQKSTELLIRK	RN.SS	3020	2663	72
WEIRRYQKSTELLIRK	RN.SS	2893	481	39		WEIRRYQKSTELLIRK	RN.SS	3026	2799	91
REIRDYQKSTELLIRK	RN.SS	2971	758	24		REIRDYQKSTELLIRK	RN.SS	3020	2331	69
REPRRYQKSTELLIRK	RN.SS	3012	2273	27		REPRRYQKSTELLIRK	RN.SS	3031	2770	62
RTIRRYQKSTELLIRK	RN.SS	3003	2336	34		RTIRRYQKSTELLIRK	RN.SS	2974	2173	58
REIRRYQKSTELLIRK	RN.SS	2979	2929	47		REIRRYQKSTELLIRK	RN.SS	3004	2908	66
KEIRRYQKSTELLIRK	RN.SS	2991	2918	66		KEIRRYQKSTELLIRK	RN.SS	3021	2961	89
REGRRYQKSTELLIRK	RN.SS	2616	300	58		REGRRYQKSTELLIRK	RN.SS	2573	386	57
RPIRRYQKSTELLIRK	RN.SS	3004	2843	65		RPIRRYQKSTELLIRK	RN.SS	3001	2879	67
REIRYYQKSTELLIRK	RN.SS	2997	1440	64		REIRYYQKSTELLIRK	RN.SS	3018	2241	76
REIVRYQKSTELLIRK	RN.SS	3013	2890	48		REIVRYQKSTELLIRK	RN.SS	3012	2903	74
REIHRYQKSTELLIRK	RN.SS	3011	2646	47		REIHRYQKSTELLIRK	RN.SS	3034	2873	94
RKIRRYQKSTELLIRK	RN.SS	3011	2854	29		RKIRRYQKSTELLIRK	RN.SS	3037	2881	68
REI_RYQKSTELLIRK	RN.SS	2842	296	33		REI_RYQKSTELLIRK	RN.SS	3001	776	68
RWIRRYQKSTELLIRK	RN.SS	3014	2781	44		RWIRRYQKSTELLIRK	RN.SS	3035	2844	72
RENRRYQKSTELLIRK	RN.SS	3013	2663	41		RENRRYQKSTELLIRK	RN.SS	3032	2859	64
IEIRRYQKSTELLIRK	RN.SS	2999	1636	26		IEIRRYQKSTELLIRK	RN.SS	3027	2763	62
REITRYQKSTELLIRK	RN.SS	3015	2551	32		REITRYQKSTELLIRK	RN.SS	3030	2867	66
RDIRRYQKSTELLIRK	RN.SS	1834	144	22		RDIRRYQKSTELLIRK	RN.SS	2506	320	76
RSIRRYQKSTELLIRK	RN.SS	1591	133	26		RSIRRYQKSTELLIRK	RN.SS	3026	2760	65
REARRYQKSTELLIRK	RN.SS	1783	174	33		REARRYQKSTELLIRK	RN.SS	2511	287	69
REINRYQKSTELLIRK	RN.SS	3014	2571	23		REINRYQKSTELLIRK	RN.SS	3028	2777	69
REIPRYQKSTELLIRK	RN.SS	2965	2916	66		REIPRYQKSTELLIRK	RN.SS	3018	2890	63
RAIRRYQKSTELLIRK	RN.SS	2502	224	59		RAIRRYQKSTELLIRK	RN.SS	2569	312	73
RNIRRYQKSTELLIRK	RN.SS	2401	197	52		RNIRRYQKSTELLIRK	RN.SS	2122	217	67
REIKRYQKSTELLIRK	RN.SS	3002	2929	61		REIKRYQKSTELLIRK	RN.SS	3019	2924	82
REIRTYQKSTELLIRK	RN.SS	2988	1768	63		REIRTYQKSTELLIRK	RN.SS	3011	2527	78
REIARYQKSTELLIRK	RN.SS	3005	2939	58		REIARYQKSTELLIRK	RN.SS	3022	2938	88
REIRGYQKSTELLIRK	RN.SS	2963	739	38		REIRGYQKSTELLIRK	RN.SS	3022	2138	97
REDRRYQKSTELLIRK	RN.SS	2727	351	33		REDRRYQKSTELLIRK	RN.SS	2993	806	65
REKRRYQKSTELLIRK	RN.SS	2987	2313	31		REKRRYQKSTELLIRK	RN.SS	2968	1948	68
REYRRYQKSTELLIRK	RN.SS	3007	2751	35		REYRRYQKSTELLIRK	RN.SS	3033	2863	71
GEIRRYQKSTELLIRK	RN.SS	3011	2022	31		GEIRRYQKSTELLIRK	RN.SS	3035	2762	73
RE_RRYQKSTELLIRK	RN.SS	2297	160	34		RE_RRYQKSTELLIRK	RN.SS	2664	303	64
REIIRYQKSTELLIRK	RN.SS	3012	2349	36		REIIRYQKSTELLIRK	RN.SS	3029	2782	78
VEIRRYQKSTELLIRK	RN.SS	2999	1927	29		VEIRRYQKSTELLIRK	RN.SS	3026	2746	81
RQIRRYQKSTELLIRK	RN.SS	2992	1692	31		RQIRRYQKSTELLIRK	RN.SS	3022	2511	69
REIRKYQKSTELLIRK	RN.SS	3011	2433	21		REIRKYQKSTELLIRK	RN.SS	3024	2802	74
DEIRRYQKSTELLIRK	RN.SS	2949	626	20		DEIRRYQKSTELLIRK	RN.SS	3016	2092	71
REIRRYQKSTELLIRK	RN.SS	2941	2920	68		REIRRYQKSTELLIRK	RN.SS	3017	2936	51
RERRRYQKSTELLIRK	RN.SS	2532	235	60		RERRRYQKSTELLIRK	RN.SS	2774	373	73
EEIRRYQKSTELLIRK	RN.SS	2968	1639	75		EEIRRYQKSTELLIRK	RN.SS	3012	2770	103
R_IRRYQKSTELLIRK	RN.SS	2728	326	58		R_IRRYQKSTELLIRK	RN.SS	2460	283	72
FEIRRYQKSTELLIRK	RN.SS	2992	2514	57		FEIRRYQKSTELLIRK	RN.SS	3020	2857	77
REERRYQKSTELLIRK	RN.SS	2673	317	54		REERRYQKSTELLIRK	RN.SS	2918	557	76
REIERYQKSTELLIRK	RN.SS	3010	2892	43		REIERYQKSTELLIRK	RN.SS	3028	2914	111
RFIRRYQKSTELLIRK	RN.SS	3001	2645	56		RFIRRYQKSTELLIRK	RN.SS	3025	2793	83
AEIRRYQKSTELLIRK	RN.SS	3002	2657	47		AEIRRYQKSTELLIRK	RN.SS	3028	2856	82
YEIRRYQKSTELLIRK	RN.SS	2978	2042	39		YEIRRYQKSTELLIRK	RN.SS	3023	1569	86
TEIRRYQKSTELLIRK	RN.SS	2995	2108	38		TEIRRYQKSTELLIRK	RN.SS	3024	2741	104
REQRRYQKSTELLIRK	RN.SS	2261	165	31		REQRRYQKSTELLIRK	RN.SS	2918	604	84
REIQRYQKSTELLIRK	RN.SS	3006	2541	41		REIQRYQKSTELLIRK	RN.SS	3027	2847	83
REIWRYQKSTELLIRK	RN.SS	2996	2067	32		REIWRYQKSTELLIRK	RN.SS	3021	2758	98
RHIRRYQKSTELLIRK	RN.SS	1321	125	23		RHIRRYQKSTELLIRK	RN.SS	1933	226	68
REIRPYQKSTELLIRK	RN.SS	2975	1336	35		REIRPYQKSTELLIRK	RN.SS	3006	2319	85
REHRRYQKSTELLIRK	RN.SS	2606	303	17		REHRRYQKSTELLIRK	RN.SS	2358	295	57
REIREYQKSTELLIRK	RN.SS	2915	1627	66		REIREYQKSTELLIRK	RN.SS	3009	2672	70
REIRVYQKSTELLIRK	RN.SS	2965	1892	57		REIRVYQKSTELLIRK	RN.SS	3011	2886	72
