# Supplementary material for: Histone H3 clipping is a novel signature of human neutrophil extracellular traps
Source: eLife. 2022 Oct 25;11:e68283. doi: 10.7554/eLife.68283 (PMC9665850; doi:10.7554/eLife.68283)
Supplement: Figure 5—source data 2. [file elife-68283-fig5-data2.csv]

	Area	Int	ID1	ID2	x.cord	y.cord	file	max.size	Int.norm	class	version	method	mark	label	experiment	dir
1	191	17,162	360	NS	786,788,788,790,790,791,791,792,792,791,791,790,790,789,789,787,787,780,780,779,779,778,778,777,777,778,778,779,779,780,780,783,783,786,	2,2,3,3,4,4,6,6,11,11,13,13,15,15,16,16,17,17,16,16,15,15,12,12,6,6,4,4,3,3,2,2,1,1,	/Volumes/Promise RAID 2/Alf/for_Thea/experiments/quantification_test 5_3D9/str_data/NS/360/3D9_PMA_360NSimage_hoescht051.TIF 3D9_PMA_360NSimage_568050.tif	1750	17,162	0	preAnalysis	none	none	360 NS	qt_5_3D9_man03	/Volumes/Promise RAID/Alf/for_Thea/experiments/quantification_test 5_3D9/3D9_5
2	379	17,137	360	NS	1293,1297,1297,1298,1298,1299,1299,1300,1300,1301,1301,1302,1302,1301,1301,1300,1300,1299,1299,1292,1292,1288,1288,1285,1285,1284,1284,1283,1283,1282,1282,1279,1279,1278,1278,1277,1277,1275,1275,1274,1274,1273,1273,1274,1274,1275,1275,1277,1277,1278,1278,1283,1283,1286,1286,1287,1287,1288,1288,1290,1290,1293,	49,49,50,50,51,51,52,52,53,53,56,56,57,57,62,62,63,63,64,64,65,65,66,66,67,67,66,66,67,67,66,66,65,65,64,64,63,63,62,62,59,59,55,55,53,53,52,52,51,51,52,52,53,53,51,51,50,50,49,49,48,48,	/Volumes/Promise RAID 2/Alf/for_Thea/experiments/quantification_test 5_3D9/str_data/NS/360/3D9_PMA_360NSimage_hoescht051.TIF 3D9_PMA_360NSimage_568050.tif	1750	17,137	0	preAnalysis	none	none	360 NS	qt_5_3D9_man03	/Volumes/Promise RAID/Alf/for_Thea/experiments/quantification_test 5_3D9/3D9_5
3	194	17,923	360	NS	1261,1264,1264,1266,1266,1267,1267,1268,1268,1267,1267,1266,1266,1265,1265,1263,1263,1262,1262,1256,1256,1254,1254,1253,1253,1252,1252,1253,1253,1254,1254,1256,1256,1257,1257,1260,1260,1261,	102,102,103,103,105,105,106,106,112,112,113,113,114,114,115,115,116,116,117,117,116,116,115,115,113,113,107,107,105,105,104,104,103,103,102,102,101,101,	/Volumes/Promise RAID 2/Alf/for_Thea/experiments/quantification_test 5_3D9/str_data/NS/360/3D9_PMA_360NSimage_hoescht051.TIF 3D9_PMA_360NSimage_568050.tif	1750	17,923	0	preAnalysis	none	none	360 NS	qt_5_3D9_man03	/Volumes/Promise RAID/Alf/for_Thea/experiments/quantification_test 5_3D9/3D9_5
4	210	16,21	360	NS	1326,1327,1327,1328,1328,1327,1327,1326,1326,1325,1325,1323,1323,1318,1318,1315,1315,1314,1314,1313,1313,1312,1312,1313,1313,1314,1314,1315,1315,1316,1316,1318,1318,1319,1319,1326,	118,118,119,119,128,128,130,130,131,131,132,132,133,133,134,134,133,133,132,132,129,129,126,126,124,124,122,122,120,120,119,119,118,118,117,117,	/Volumes/Promise RAID 2/Alf/for_Thea/experiments/quantification_test 5_3D9/str_data/NS/360/3D9_PMA_360NSimage_hoescht051.TIF 3D9_PMA_360NSimage_568050.tif	1750	16,21	0	preAnalysis	none	none	360 NS	qt_5_3D9_man03	/Volumes/Promise RAID/Alf/for_Thea/experiments/quantification_test 5_3D9/3D9_5
5	194	17,665	360	NS	1048,1050,1050,1051,1051,1052,1052,1053,1053,1054,1054,1053,1053,1052,1052,1051,1051,1049,1049,1047,1047,1044,1044,1042,1042,1040,1040,1039,1039,1038,1038,1037,1037,1038,1038,1039,1039,1040,1040,1041,1041,1044,1044,1048,	134,134,135,135,136,136,137,137,139,139,142,142,145,145,146,146,147,147,148,148,149,149,148,148,147,147,146,146,144,144,142,142,140,140,138,138,136,136,135,135,134,134,133,133,	/Volumes/Promise RAID 2/Alf/for_Thea/experiments/quantification_test 5_3D9/str_data/NS/360/3D9_PMA_360NSimage_hoescht051.TIF 3D9_PMA_360NSimage_568050.tif	1750	17,665	0	preAnalysis	none	none	360 NS	qt_5_3D9_man03	/Volumes/Promise RAID/Alf/for_Thea/experiments/quantification_test 5_3D9/3D9_5
6	197	18,447	360	NS	728,730,730,732,732,733,733,734,734,735,735,734,734,733,733,732,732,730,730,723,723,721,721,720,720,719,719,718,718,719,719,720,720,721,721,724,724,728,	165,165,166,166,168,168,169,169,171,171,174,174,176,176,177,177,178,178,179,179,178,178,177,177,176,176,174,174,168,168,167,167,166,166,165,165,164,164,	/Volumes/Promise RAID 2/Alf/for_Thea/experiments/quantification_test 5_3D9/str_data/NS/360/3D9_PMA_360NSimage_hoescht051.TIF 3D9_PMA_360NSimage_568050.tif	1750	18,447	0	preAnalysis	none	none	360 NS	qt_5_3D9_man03	/Volumes/Promise RAID/Alf/for_Thea/experiments/quantification_test 5_3D9/3D9_5
7	169	16,243	360	NS	297,301,301,303,303,304,304,305,305,306,306,305,305,304,304,303,303,302,302,300,300,297,297,296,296,295,295,294,294,293,293,292,292,291,291,290,290,291,291,292,292,293,293,296,296,297,	171,171,172,172,174,174,176,176,178,178,179,179,181,181,183,183,184,184,185,185,186,186,185,185,184,184,183,183,182,182,181,181,180,180,178,178,175,175,173,173,172,172,171,171,170,170,	/Volumes/Promise RAID 2/Alf/for_Thea/experiments/quantification_test 5_3D9/str_data/NS/360/3D9_PMA_360NSimage_hoescht051.TIF 3D9_PMA_360NSimage_568050.tif	1750	16,243	0	preAnalysis	none	none	360 NS	qt_5_3D9_man03	/Volumes/Promise RAID/Alf/for_Thea/experiments/quantification_test 5_3D9/3D9_5
8	144	12,444	360	NS	67,69,69,70,70,71,71,70,70,69,69,68,68,67,67,65,65,63,63,62,62,61,61,59,59,58,58,59,59,60,60,62,62,63,63,67,	205,205,206,206,208,208,214,214,215,215,216,216,217,217,218,218,219,219,218,218,217,217,216,216,215,215,209,209,208,208,206,206,205,205,204,204,	/Volumes/Promise RAID 2/Alf/for_Thea/experiments/quantification_test 5_3D9/str_data/NS/360/3D9_PMA_360NSimage_hoescht051.TIF 3D9_PMA_360NSimage_568050.tif	1750	12,444	0	preAnalysis	none	none	360 NS	qt_5_3D9_man03	/Volumes/Promise RAID/Alf/for_Thea/experiments/quantification_test 5_3D9/3D9_5
9	138	13,681	360	NS	63,65,65,67,67,68,68,67,67,66,66,65,65,60,60,57,57,56,56,55,55,56,56,57,57,63,	247,247,248,248,250,250,255,255,257,257,258,258,259,259,258,258,256,256,255,255,249,249,247,247,246,246,	/Volumes/Promise RAID 2/Alf/for_Thea/experiments/quantification_test 5_3D9/str_data/NS/360/3D9_PMA_360NSimage_hoescht051.TIF 3D9_PMA_360NSimage_568050.tif	1750	13,681	0	preAnalysis	none	none	360 NS	qt_5_3D9_man03	/Volumes/Promise RAID/Alf/for_Thea/experiments/quantification_test 5_3D9/3D9_5
10	241	17,56	360	NS	712,715,715,716,716,717,717,718,718,719,719,718,718,717,717,716,716,715,715,713,713,705,705,704,704,703,703,702,702,701,701,702,702,703,703,704,704,706,706,712,	249,249,250,250,251,251,252,252,254,254,257,257,260,260,262,262,263,263,264,264,265,265,264,264,262,262,261,261,258,258,253,253,251,251,250,250,249,249,248,248,	/Volumes/Promise RAID 2/Alf/for_Thea/experiments/quantification_test 5_3D9/str_data/NS/360/3D9_PMA_360NSimage_hoescht051.TIF 3D9_PMA_360NSimage_568050.tif	1750	17,56	0	preAnalysis	none	none	360 NS	qt_5_3D9_man03	/Volumes/Promise RAID/Alf/for_Thea/experiments/quantification_test 5_3D9/3D9_5
11	175	15,314	360	NS	358,360,360,361,361,362,362,363,363,362,362,361,361,360,360,359,359,358,358,352,352,351,351,350,350,349,349,348,348,349,349,350,350,351,351,353,353,358,	281,281,282,282,283,283,284,284,289,289,291,291,292,292,293,293,294,294,295,295,294,294,293,293,292,292,290,290,285,285,283,283,282,282,281,281,280,280,	/Volumes/Promise RAID 2/Alf/for_Thea/experiments/quantification_test 5_3D9/str_data/NS/360/3D9_PMA_360NSimage_hoescht051.TIF 3D9_PMA_360NSimage_568050.tif	1750	15,314	0	preAnalysis	none	none	360 NS	qt_5_3D9_man03	/Volumes/Promise RAID/Alf/for_Thea/experiments/quantification_test 5_3D9/3D9_5
12	178	18,815	360	NS	1032,1035,1035,1037,1037,1038,1038,1037,1037,1036,1036,1034,1034,1028,1028,1026,1026,1025,1025,1024,1024,1023,1023,1024,1024,1025,1025,1026,1026,1029,1029,1032,	291,291,293,293,295,295,301,301,303,303,304,304,305,305,304,304,303,303,302,302,300,300,295,295,293,293,292,292,291,291,290,290,	/Volumes/Promise RAID 2/Alf/for_Thea/experiments/quantification_test 5_3D9/str_data/NS/360/3D9_PMA_360NSimage_hoescht051.TIF 3D9_PMA_360NSimage_568050.tif	1750	18,815	0	preAnalysis	none	none	360 NS	qt_5_3D9_man03	/Volumes/Promise RAID/Alf/for_Thea/experiments/quantification_test 5_3D9/3D9_5
13	175	16,617	360	NS	513,515,515,516,516,517,517,516,516,515,515,514,514,511,511,508,508,506,506,505,505,504,504,503,503,502,502,503,503,504,504,505,505,508,508,513,	322,322,324,324,325,325,332,332,333,333,334,334,335,335,336,336,335,335,334,334,333,333,332,332,331,331,326,326,324,324,323,323,322,322,321,321,	/Volumes/Promise RAID 2/Alf/for_Thea/experiments/quantification_test 5_3D9/str_data/NS/360/3D9_PMA_360NSimage_hoescht051.TIF 3D9_PMA_360NSimage_568050.tif	1750	16,617	0	preAnalysis	none	none	360 NS	qt_5_3D9_man03	/Volumes/Promise RAID/Alf/for_Thea/experiments/quantification_test 5_3D9/3D9_5
14	237	14,848	360	NS	678,679,679,678,678,677,677,676,676,675,675,674,674,672,672,669,669,668,668,667,667,666,666,665,665,666,666,667,667,668,668,669,669,670,670,671,671,672,672,673,673,678,	326,326,338,338,341,341,344,344,346,346,347,347,348,348,349,349,348,348,349,349,348,348,345,345,340,340,337,337,334,334,333,333,332,332,331,331,328,328,326,326,325,325,	/Volumes/Promise RAID 2/Alf/for_Thea/experiments/quantification_test 5_3D9/str_data/NS/360/3D9_PMA_360NSimage_hoescht051.TIF 3D9_PMA_360NSimage_568050.tif	1750	14,848	0	preAnalysis	none	none	360 NS	qt_5_3D9_man03	/Volumes/Promise RAID/Alf/for_Thea/experiments/quantification_test 5_3D9/3D9_5
15	127	5,417	360	NS	20,21,21,22,22,21,21,20,20,19,19,16,16,13,13,11,11,10,10,11,11,12,12,14,14,20,	349,349,350,350,356,356,357,357,358,358,359,359,360,360,359,359,358,358,351,351,349,349,348,348,347,347,	/Volumes/Promise RAID 2/Alf/for_Thea/experiments/quantification_test 5_3D9/str_data/NS/360/3D9_PMA_360NSimage_hoescht051.TIF 3D9_PMA_360NSimage_568050.tif	1750	5,417	0	preAnalysis	none	none	360 NS	qt_5_3D9_man03	/Volumes/Promise RAID/Alf/for_Thea/experiments/quantification_test 5_3D9/3D9_5
16	154	15,786	360	NS	391,393,393,394,394,395,395,396,396,395,395,394,394,392,392,386,386,385,385,384,384,383,383,384,384,386,386,389,389,391,	377,377,378,378,380,380,383,383,387,387,389,389,390,390,391,391,390,390,389,389,387,387,380,380,378,378,377,377,376,376,	/Volumes/Promise RAID 2/Alf/for_Thea/experiments/quantification_test 5_3D9/str_data/NS/360/3D9_PMA_360NSimage_hoescht051.TIF 3D9_PMA_360NSimage_568050.tif	1750	15,786	0	preAnalysis	none	none	360 NS	qt_5_3D9_man03	/Volumes/Promise RAID/Alf/for_Thea/experiments/quantification_test 5_3D9/3D9_5
17	559	24,56	360	NS	778,782,782,783,783,784,784,783,783,786,786,787,787,788,788,791,791,792,792,794,794,795,795,796,796,797,797,798,798,801,801,802,802,803,803,804,804,803,803,800,800,796,796,793,793,792,792,790,790,789,789,788,788,787,787,789,789,787,787,786,786,785,785,784,784,783,783,781,781,780,780,779,779,777,777,775,775,774,774,773,773,772,772,771,771,770,770,771,771,770,770,771,771,772,772,773,773,774,774,776…	379,379,380,380,381,381,384,384,385,385,384,384,383,383,389,389,388,388,389,389,387,387,386,386,384,384,383,383,384,384,386,386,387,387,388,388,389,389,390,390,391,391,392,392,393,393,394,394,395,395,396,396,398,398,401,401,402,402,403,403,407,407,409,409,411,411,413,413,414,414,415,415,416,416,417,417,418,418,415,415,414,414,412,412,408,408,406,406,405,405,402,402,397,397,396,396,392,392,389,389…	/Volumes/Promise RAID 2/Alf/for_Thea/experiments/quantification_test 5_3D9/str_data/NS/360/3D9_PMA_360NSimage_hoescht051.TIF 3D9_PMA_360NSimage_568050.tif	1750	24,56	0	preAnalysis	none	none	360 NS	qt_5_3D9_man03	/Volumes/Promise RAID/Alf/for_Thea/experiments/quantification_test 5_3D9/3D9_5
18	174	15,764	360	NS	444,446,446,447,447,448,448,449,449,448,448,447,447,446,446,438,438,436,436,435,435,434,434,433,433,434,434,435,435,437,437,439,439,444,	402,402,403,403,405,405,406,406,412,412,413,413,414,414,415,415,414,414,412,412,411,411,409,409,407,407,405,405,403,403,402,402,401,401,	/Volumes/Promise RAID 2/Alf/for_Thea/experiments/quantification_test 5_3D9/str_data/NS/360/3D9_PMA_360NSimage_hoescht051.TIF 3D9_PMA_360NSimage_568050.tif	1750	15,764	0	preAnalysis	none	none	360 NS	qt_5_3D9_man03	/Volumes/Promise RAID/Alf/for_Thea/experiments/quantification_test 5_3D9/3D9_5
19	202	19,649	360	NS	938,940,940,941,941,942,942,943,943,944,944,943,943,942,942,941,941,940,940,934,934,933,933,931,931,930,930,929,929,930,930,931,931,932,932,934,934,938,	447,447,448,448,449,449,450,450,451,451,458,458,460,460,461,461,462,462,463,463,462,462,461,461,459,459,458,458,451,451,449,449,448,448,447,447,446,446,	/Volumes/Promise RAID 2/Alf/for_Thea/experiments/quantification_test 5_3D9/str_data/NS/360/3D9_PMA_360NSimage_hoescht051.TIF 3D9_PMA_360NSimage_568050.tif	1750	19,649	0	preAnalysis	none	none	360 NS	qt_5_3D9_man03	/Volumes/Promise RAID/Alf/for_Thea/experiments/quantification_test 5_3D9/3D9_5
20	185	18,232	360	NS	567,571,571,572,572,573,573,574,574,575,575,576,576,575,575,574,574,567,567,566,566,565,565,564,564,563,563,562,562,564,564,565,565,566,566,567,	468,468,469,469,470,470,471,471,472,472,473,473,482,482,483,483,484,484,483,483,482,482,481,481,480,480,477,477,470,470,469,469,468,468,467,467,	/Volumes/Promise RAID 2/Alf/for_Thea/experiments/quantification_test 5_3D9/str_data/NS/360/3D9_PMA_360NSimage_hoescht051.TIF 3D9_PMA_360NSimage_568050.tif	1750	18,232	0	preAnalysis	none	none	360 NS	qt_5_3D9_man03	/Volumes/Promise RAID/Alf/for_Thea/experiments/quantification_test 5_3D9/3D9_5
21	156	15,859	360	NS	162,164,164,165,165,166,166,167,167,166,166,165,165,164,164,158,158,156,156,154,154,153,153,152,152,153,153,154,154,162,	478,478,479,479,480,480,483,483,485,485,487,487,489,489,490,490,489,489,488,488,487,487,485,485,479,479,478,478,477,477,	/Volumes/Promise RAID 2/Alf/for_Thea/experiments/quantification_test 5_3D9/str_data/NS/360/3D9_PMA_360NSimage_hoescht051.TIF 3D9_PMA_360NSimage_568050.tif	1750	15,859	0	preAnalysis	none	none	360 NS	qt_5_3D9_man03	/Volumes/Promise RAID/Alf/for_Thea/experiments/quantification_test 5_3D9/3D9_5
22	182	26,302	360	NS	733,735,735,737,737,738,738,739,739,740,740,739,739,738,738,737,737,736,736,733,733,731,731,726,726,725,725,726,726,727,727,728,728,729,729,733,	501,501,502,502,503,503,504,504,506,506,509,509,512,512,513,513,514,514,515,515,516,516,515,515,511,511,504,504,503,503,502,502,501,501,500,500,	/Volumes/Promise RAID 2/Alf/for_Thea/experiments/quantification_test 5_3D9/str_data/NS/360/3D9_PMA_360NSimage_hoescht051.TIF 3D9_PMA_360NSimage_568050.tif	1750	26,302	0	preAnalysis	none	none	360 NS	qt_5_3D9_man03	/Volumes/Promise RAID/Alf/for_Thea/experiments/quantification_test 5_3D9/3D9_5
23	195	20,595	360	NS	520,522,522,523,523,524,524,523,523,522,522,521,521,518,518,513,513,511,511,510,510,509,509,508,508,509,509,511,511,512,512,514,514,516,516,520,	515,515,516,516,518,518,523,523,527,527,528,528,529,529,530,530,529,529,528,528,526,526,524,524,521,521,518,518,517,517,516,516,515,515,514,514,	/Volumes/Promise RAID 2/Alf/for_Thea/experiments/quantification_test 5_3D9/str_data/NS/360/3D9_PMA_360NSimage_hoescht051.TIF 3D9_PMA_360NSimage_568050.tif	1750	20,595	0	preAnalysis	none	none	360 NS	qt_5_3D9_man03	/Volumes/Promise RAID/Alf/for_Thea/experiments/quantification_test 5_3D9/3D9_5
24	172	15,988	360	NS	649,650,650,651,651,652,652,653,653,652,652,651,651,650,650,648,648,641,641,640,640,639,639,638,638,639,639,640,640,642,642,649,	521,521,522,522,523,523,526,526,529,529,531,531,532,532,533,533,534,534,533,533,532,532,531,531,524,524,522,522,521,521,520,520,	/Volumes/Promise RAID 2/Alf/for_Thea/experiments/quantification_test 5_3D9/str_data/NS/360/3D9_PMA_360NSimage_hoescht051.TIF 3D9_PMA_360NSimage_568050.tif	1750	15,988	0	preAnalysis	none	none	360 NS	qt_5_3D9_man03	/Volumes/Promise RAID/Alf/for_Thea/experiments/quantification_test 5_3D9/3D9_5
25	226	39,283	360	NS	727,728,728,731,731,732,732,733,733,734,734,733,733,732,732,731,731,730,730,728,728,720,720,719,719,718,718,717,717,718,718,719,719,720,720,721,721,723,723,725,725,726,726,727,	524,524,525,525,526,526,527,527,529,529,534,534,536,536,538,538,539,539,540,540,541,541,540,540,539,539,537,537,531,531,529,529,528,528,527,527,526,526,525,525,524,524,523,523,	/Volumes/Promise RAID 2/Alf/for_Thea/experiments/quantification_test 5_3D9/str_data/NS/360/3D9_PMA_360NSimage_hoescht051.TIF 3D9_PMA_360NSimage_568050.tif	1750	39,283	0	preAnalysis	none	none	360 NS	qt_5_3D9_man03	/Volumes/Promise RAID/Alf/for_Thea/experiments/quantification_test 5_3D9/3D9_5
26	204	18,426	360	NS	933,935,935,936,936,937,937,938,938,937,937,936,936,935,935,934,934,928,928,927,927,926,926,925,925,924,924,923,923,924,924,925,925,926,926,928,928,933,	527,527,528,528,529,529,531,531,538,538,540,540,541,541,542,542,543,543,542,542,541,541,540,540,539,539,537,537,531,531,529,529,528,528,527,527,526,526,	/Volumes/Promise RAID 2/Alf/for_Thea/experiments/quantification_test 5_3D9/str_data/NS/360/3D9_PMA_360NSimage_hoescht051.TIF 3D9_PMA_360NSimage_568050.tif	1750	18,426	0	preAnalysis	none	none	360 NS	qt_5_3D9_man03	/Volumes/Promise RAID/Alf/for_Thea/experiments/quantification_test 5_3D9/3D9_5
27	197	16,477	360	NS	697,698,698,699,699,700,700,701,701,702,702,701,701,702,702,701,701,700,700,699,699,697,697,695,695,692,692,688,688,686,686,685,685,686,686,687,687,690,690,697,	529,529,530,530,531,531,533,533,534,534,535,535,536,536,537,537,539,539,540,540,541,541,542,542,543,543,542,542,541,541,538,538,531,531,530,530,529,529,528,528,	/Volumes/Promise RAID 2/Alf/for_Thea/experiments/quantification_test 5_3D9/str_data/NS/360/3D9_PMA_360NSimage_hoescht051.TIF 3D9_PMA_360NSimage_568050.tif	1750	16,477	0	preAnalysis	none	none	360 NS	qt_5_3D9_man03	/Volumes/Promise RAID/Alf/for_Thea/experiments/quantification_test 5_3D9/3D9_5
28	179	20,827	360	NS	864,867,867,869,869,870,870,871,871,870,870,869,869,868,868,867,867,861,861,860,860,858,858,857,857,856,856,857,857,858,858,859,859,860,860,863,863,864,	529,529,530,530,531,531,533,533,539,539,541,541,542,542,543,543,544,544,543,543,542,542,540,540,536,536,534,534,532,532,531,531,530,530,529,529,528,528,	/Volumes/Promise RAID 2/Alf/for_Thea/experiments/quantification_test 5_3D9/str_data/NS/360/3D9_PMA_360NSimage_hoescht051.TIF 3D9_PMA_360NSimage_568050.tif	1750	20,827	0	preAnalysis	none	none	360 NS	qt_5_3D9_man03	/Volumes/Promise RAID/Alf/for_Thea/experiments/quantification_test 5_3D9/3D9_5
29	122	6,426	360	NS	27,29,29,30,30,31,31,32,32,33,33,32,32,30,30,28,28,26,26,21,21,20,20,19,19,20,20,21,21,22,22,27,	549,549,550,550,552,552,553,553,555,555,556,556,558,558,559,559,560,560,559,559,558,558,557,557,551,551,550,550,549,549,548,548,	/Volumes/Promise RAID 2/Alf/for_Thea/experiments/quantification_test 5_3D9/str_data/NS/360/3D9_PMA_360NSimage_hoescht051.TIF 3D9_PMA_360NSimage_568050.tif	1750	6,426	0	preAnalysis	none	none	360 NS	qt_5_3D9_man03	/Volumes/Promise RAID/Alf/for_Thea/experiments/quantification_test 5_3D9/3D9_5
30	258	15,942	360	NS	860,861,861,863,863,865,865,866,866,867,867,868,868,869,869,870,870,869,869,867,867,864,864,862,862,859,859,858,858,857,857,855,855,854,854,853,853,852,852,853,853,852,852,855,855,860,	563,563,564,564,565,565,566,566,567,567,568,568,570,570,572,572,580,580,581,581,582,582,581,581,580,580,579,579,578,578,577,577,576,576,574,574,571,571,570,570,569,569,563,563,562,562,	/Volumes/Promise RAID 2/Alf/for_Thea/experiments/quantification_test 5_3D9/str_data/NS/360/3D9_PMA_360NSimage_hoescht051.TIF 3D9_PMA_360NSimage_568050.tif	1750	15,942	0	preAnalysis	none	none	360 NS	qt_5_3D9_man03	/Volumes/Promise RAID/Alf/for_Thea/experiments/quantification_test 5_3D9/3D9_5
31	194	20,588	360	NS	956,957,957,958,958,959,959,958,958,957,957,955,955,954,954,947,947,945,945,944,944,943,943,944,944,945,945,947,947,948,948,956,	566,566,568,568,571,571,574,574,576,576,578,578,579,579,580,580,579,579,578,578,576,576,570,570,568,568,567,567,566,566,565,565,	/Volumes/Promise RAID 2/Alf/for_Thea/experiments/quantification_test 5_3D9/str_data/NS/360/3D9_PMA_360NSimage_hoescht051.TIF 3D9_PMA_360NSimage_568050.tif	1750	20,588	0	preAnalysis	none	none	360 NS	qt_5_3D9_man03	/Volumes/Promise RAID/Alf/for_Thea/experiments/quantification_test 5_3D9/3D9_5
32	295	15,451	360	NS	1224,1226,1226,1227,1227,1228,1228,1229,1229,1228,1228,1227,1227,1226,1226,1217,1217,1214,1214,1213,1213,1211,1211,1210,1210,1211,1211,1212,1212,1213,1213,1214,1214,1216,1216,1218,1218,1224,	582,582,584,584,586,586,589,589,595,595,598,598,599,599,600,600,599,599,598,598,597,597,595,595,587,587,586,586,585,585,584,584,583,583,582,582,581,581,	/Volumes/Promise RAID 2/Alf/for_Thea/experiments/quantification_test 5_3D9/str_data/NS/360/3D9_PMA_360NSimage_hoescht051.TIF 3D9_PMA_360NSimage_568050.tif	1750	15,451	0	preAnalysis	none	none	360 NS	qt_5_3D9_man03	/Volumes/Promise RAID/Alf/for_Thea/experiments/quantification_test 5_3D9/3D9_5
33	278	14,094	360	NS	1028,1030,1030,1031,1031,1032,1032,1031,1031,1030,1030,1029,1029,1028,1028,1027,1027,1026,1026,1025,1025,1023,1023,1022,1022,1021,1021,1016,1016,1015,1015,1013,1013,1012,1012,1011,1011,1010,1010,1009,1009,1010,1010,1011,1011,1012,1012,1014,1014,1015,1015,1016,1016,1018,1018,1019,1019,1023,1023,1026,1026,1028,	584,584,585,585,587,587,589,589,592,592,593,593,594,594,596,596,597,597,598,598,599,599,600,600,601,601,602,602,603,603,602,602,601,601,600,600,599,599,596,596,595,595,592,592,591,591,590,590,589,589,588,588,587,587,586,586,585,585,584,584,583,583,	/Volumes/Promise RAID 2/Alf/for_Thea/experiments/quantification_test 5_3D9/str_data/NS/360/3D9_PMA_360NSimage_hoescht051.TIF 3D9_PMA_360NSimage_568050.tif	1750	14,094	0	preAnalysis	none	none	360 NS	qt_5_3D9_man03	/Volumes/Promise RAID/Alf/for_Thea/experiments/quantification_test 5_3D9/3D9_5
34	191	22,419	360	NS	749,750,750,752,752,753,753,754,754,755,755,754,754,753,753,752,752,750,750,744,744,742,742,741,741,740,740,739,739,740,740,741,741,743,743,746,746,749,	596,596,597,597,598,598,599,599,600,600,602,602,607,607,609,609,610,610,611,611,610,610,608,608,607,607,605,605,600,600,599,599,597,597,596,596,595,595,	/Volumes/Promise RAID 2/Alf/for_Thea/experiments/quantification_test 5_3D9/str_data/NS/360/3D9_PMA_360NSimage_hoescht051.TIF 3D9_PMA_360NSimage_568050.tif	1750	22,419	0	preAnalysis	none	none	360 NS	qt_5_3D9_man03	/Volumes/Promise RAID/Alf/for_Thea/experiments/quantification_test 5_3D9/3D9_5
35	747	37,114	360	NS	823,828,828,830,830,831,831,833,833,834,834,835,835,837,837,838,838,840,840,841,841,842,842,841,841,840,840,839,839,837,837,836,836,835,835,833,833,832,832,831,831,830,830,829,829,828,828,826,826,825,825,824,824,823,823,822,822,821,821,819,819,818,818,817,817,816,816,815,815,814,814,813,813,812,812,811,811,810,810,809,809,808,808,807,807,806,806,805,805,804,804,803,803,802,802,801,801,800,800,799…	610,610,611,611,612,612,613,613,611,611,612,612,613,613,615,615,617,617,618,618,619,619,621,621,626,626,627,627,628,628,629,629,631,631,632,632,633,633,634,634,635,635,636,636,637,637,638,638,639,639,640,640,641,641,643,643,644,644,645,645,646,646,647,647,648,648,649,649,650,650,651,651,652,652,653,653,655,655,656,656,657,657,658,658,660,660,661,661,663,663,664,664,665,665,667,667,668,668,670,670…	/Volumes/Promise RAID 2/Alf/for_Thea/experiments/quantification_test 5_3D9/str_data/NS/360/3D9_PMA_360NSimage_hoescht051.TIF 3D9_PMA_360NSimage_568050.tif	1750	37,114	0	preAnalysis	none	none	360 NS	qt_5_3D9_man03	/Volumes/Promise RAID/Alf/for_Thea/experiments/quantification_test 5_3D9/3D9_5
36	151	14,245	360	NS	271,272,272,273,273,274,274,273,273,274,274,273,273,272,272,271,271,269,269,268,268,262,262,261,261,262,262,263,263,264,264,267,267,271,	667,667,668,668,669,669,672,672,673,673,675,675,676,676,679,679,680,680,681,681,680,680,678,678,671,671,669,669,668,668,667,667,666,666,	/Volumes/Promise RAID 2/Alf/for_Thea/experiments/quantification_test 5_3D9/str_data/NS/360/3D9_PMA_360NSimage_hoescht051.TIF 3D9_PMA_360NSimage_568050.tif	1750	14,245	0	preAnalysis	none	none	360 NS	qt_5_3D9_man03	/Volumes/Promise RAID/Alf/for_Thea/experiments/quantification_test 5_3D9/3D9_5
37	214	18,332	360	NS	1140,1142,1142,1143,1143,1144,1144,1145,1145,1146,1146,1147,1147,1146,1146,1145,1145,1143,1143,1140,1140,1138,1138,1136,1136,1134,1134,1133,1133,1132,1132,1131,1131,1130,1130,1131,1131,1132,1132,1133,1133,1135,1135,1140,	705,705,706,706,707,707,708,708,709,709,711,711,715,715,717,717,719,719,720,720,721,721,720,720,719,719,718,718,717,717,716,716,715,715,708,708,707,707,706,706,705,705,704,704,	/Volumes/Promise RAID 2/Alf/for_Thea/experiments/quantification_test 5_3D9/str_data/NS/360/3D9_PMA_360NSimage_hoescht051.TIF 3D9_PMA_360NSimage_568050.tif	1750	18,332	0	preAnalysis	none	none	360 NS	qt_5_3D9_man03	/Volumes/Promise RAID/Alf/for_Thea/experiments/quantification_test 5_3D9/3D9_5
38	298	35,742	360	NS	270,271,271,272,272,273,273,274,274,275,275,277,277,278,278,279,279,280,280,283,283,285,285,287,287,289,289,286,286,285,285,284,284,283,283,279,279,278,278,277,277,276,276,275,275,274,274,271,271,270,270,267,267,265,265,264,264,263,263,262,262,261,261,262,262,263,263,264,264,265,265,270,	753,753,754,754,755,755,757,757,758,758,759,759,758,758,757,757,758,758,757,757,758,758,759,759,760,760,762,762,763,763,764,764,765,765,766,766,767,767,768,768,770,770,771,771,772,772,774,774,770,770,768,768,766,766,765,765,764,764,762,762,760,760,756,756,755,755,754,754,753,753,752,752,	/Volumes/Promise RAID 2/Alf/for_Thea/experiments/quantification_test 5_3D9/str_data/NS/360/3D9_PMA_360NSimage_hoescht051.TIF 3D9_PMA_360NSimage_568050.tif	1750	35,742	0	preAnalysis	none	none	360 NS	qt_5_3D9_man03	/Volumes/Promise RAID/Alf/for_Thea/experiments/quantification_test 5_3D9/3D9_5
39	226	18,482	360	NS	1081,1082,1082,1084,1084,1085,1085,1086,1086,1087,1087,1086,1086,1085,1085,1084,1084,1082,1082,1076,1076,1074,1074,1073,1073,1072,1072,1071,1071,1070,1070,1069,1069,1070,1070,1071,1071,1072,1072,1073,1073,1075,1075,1078,1078,1081,	779,779,780,780,781,781,783,783,784,784,790,790,792,792,793,793,794,794,795,795,794,794,793,793,792,792,791,791,790,790,789,789,786,786,783,783,782,782,781,781,780,780,779,779,778,778,	/Volumes/Promise RAID 2/Alf/for_Thea/experiments/quantification_test 5_3D9/str_data/NS/360/3D9_PMA_360NSimage_hoescht051.TIF 3D9_PMA_360NSimage_568050.tif	1750	18,482	0	preAnalysis	none	none	360 NS	qt_5_3D9_man03	/Volumes/Promise RAID/Alf/for_Thea/experiments/quantification_test 5_3D9/3D9_5
40	155	24,587	360	NS	271,272,272,276,276,277,277,276,276,275,275,273,273,270,270,268,268,265,265,263,263,262,262,261,261,260,260,261,261,262,262,263,263,264,264,267,267,271,	784,784,783,783,785,785,790,790,791,791,792,792,793,793,794,794,795,795,796,796,795,795,794,794,792,792,791,791,788,788,786,786,785,785,784,784,783,783,	/Volumes/Promise RAID 2/Alf/for_Thea/experiments/quantification_test 5_3D9/str_data/NS/360/3D9_PMA_360NSimage_hoescht051.TIF 3D9_PMA_360NSimage_568050.tif	1750	24,587	0	preAnalysis	none	none	360 NS	qt_5_3D9_man03	/Volumes/Promise RAID/Alf/for_Thea/experiments/quantification_test 5_3D9/3D9_5
41	184	20,658	360	NS	785,786,786,787,787,788,788,789,789,790,790,789,789,788,788,786,786,784,784,781,781,779,779,777,777,776,776,775,775,776,776,777,777,779,779,785,	809,809,810,810,811,811,813,813,815,815,818,818,820,820,822,822,823,823,824,824,823,823,822,822,820,820,819,819,811,811,810,810,809,809,808,808,	/Volumes/Promise RAID 2/Alf/for_Thea/experiments/quantification_test 5_3D9/str_data/NS/360/3D9_PMA_360NSimage_hoescht051.TIF 3D9_PMA_360NSimage_568050.tif	1750	20,658	0	preAnalysis	none	none	360 NS	qt_5_3D9_man03	/Volumes/Promise RAID/Alf/for_Thea/experiments/quantification_test 5_3D9/3D9_5
42	327	14,242	360	NS	1265,1267,1267,1269,1269,1270,1270,1271,1271,1272,1272,1273,1273,1274,1274,1275,1275,1276,1276,1275,1275,1274,1274,1272,1272,1269,1269,1268,1268,1264,1264,1262,1262,1261,1261,1259,1259,1258,1258,1257,1257,1256,1256,1255,1255,1254,1254,1255,1255,1257,1257,1259,1259,1265,	838,838,839,839,840,840,841,841,842,842,843,843,845,845,846,846,849,849,852,852,854,854,856,856,857,857,858,858,857,857,856,856,855,855,854,854,853,853,852,852,851,851,850,850,848,848,841,841,839,839,838,838,837,837,	/Volumes/Promise RAID 2/Alf/for_Thea/experiments/quantification_test 5_3D9/str_data/NS/360/3D9_PMA_360NSimage_hoescht051.TIF 3D9_PMA_360NSimage_568050.tif	1750	14,242	0	preAnalysis	none	none	360 NS	qt_5_3D9_man03	/Volumes/Promise RAID/Alf/for_Thea/experiments/quantification_test 5_3D9/3D9_5
43	126	15,937	360	NS	194,195,195,196,196,197,197,198,198,197,197,196,196,193,193,188,188,186,186,185,185,186,186,188,188,194,	857,857,858,858,859,859,861,861,865,865,866,866,867,867,868,868,867,867,865,865,860,860,857,857,856,856,	/Volumes/Promise RAID 2/Alf/for_Thea/experiments/quantification_test 5_3D9/str_data/NS/360/3D9_PMA_360NSimage_hoescht051.TIF 3D9_PMA_360NSimage_568050.tif	1750	15,937	0	preAnalysis	none	none	360 NS	qt_5_3D9_man03	/Volumes/Promise RAID/Alf/for_Thea/experiments/quantification_test 5_3D9/3D9_5
44	130	15,508	360	NS	131,136,136,137,137,138,138,139,139,138,138,136,136,135,135,128,128,127,127,126,126,125,125,126,126,128,128,130,130,131,	892,892,893,893,894,894,895,895,899,899,901,901,902,902,903,903,902,902,901,901,900,900,894,894,893,893,892,892,891,891,	/Volumes/Promise RAID 2/Alf/for_Thea/experiments/quantification_test 5_3D9/str_data/NS/360/3D9_PMA_360NSimage_hoescht051.TIF 3D9_PMA_360NSimage_568050.tif	1750	15,508	0	preAnalysis	none	none	360 NS	qt_5_3D9_man03	/Volumes/Promise RAID/Alf/for_Thea/experiments/quantification_test 5_3D9/3D9_5
45	171	15,48	360	NS	472,473,473,474,474,475,475,476,476,477,477,478,478,477,477,476,476,475,475,473,473,468,468,466,466,465,465,464,464,463,463,464,464,465,465,466,466,472,	904,904,905,905,906,906,907,907,908,908,911,911,912,912,915,915,916,916,917,917,918,918,917,917,916,916,915,915,913,913,906,906,905,905,904,904,903,903,	/Volumes/Promise RAID 2/Alf/for_Thea/experiments/quantification_test 5_3D9/str_data/NS/360/3D9_PMA_360NSimage_hoescht051.TIF 3D9_PMA_360NSimage_568050.tif	1750	15,48	0	preAnalysis	none	none	360 NS	qt_5_3D9_man03	/Volumes/Promise RAID/Alf/for_Thea/experiments/quantification_test 5_3D9/3D9_5
46	166	17,398	360	NS	635,637,637,638,638,640,640,641,641,640,640,639,639,638,638,637,637,636,636,633,633,631,631,628,628,627,627,626,626,625,625,626,626,627,627,628,628,630,630,632,632,635,	915,915,916,916,917,917,919,919,922,922,924,924,925,925,926,926,927,927,928,928,929,929,928,928,927,927,926,926,924,924,922,922,919,919,917,917,916,916,915,915,914,914,	/Volumes/Promise RAID 2/Alf/for_Thea/experiments/quantification_test 5_3D9/str_data/NS/360/3D9_PMA_360NSimage_hoescht051.TIF 3D9_PMA_360NSimage_568050.tif	1750	17,398	0	preAnalysis	none	none	360 NS	qt_5_3D9_man03	/Volumes/Promise RAID/Alf/for_Thea/experiments/quantification_test 5_3D9/3D9_5
47	208	19,005	360	NS	678,679,679,680,680,681,681,682,682,681,681,680,680,679,679,678,678,676,676,672,672,670,670,669,669,668,668,667,667,666,666,667,667,668,668,670,670,672,672,678,	967,967,968,968,970,970,972,972,977,977,979,979,980,980,981,981,982,982,983,983,982,982,981,981,980,980,979,979,976,976,972,972,970,970,968,968,967,967,966,966,	/Volumes/Promise RAID 2/Alf/for_Thea/experiments/quantification_test 5_3D9/str_data/NS/360/3D9_PMA_360NSimage_hoescht051.TIF 3D9_PMA_360NSimage_568050.tif	1750	19,005	0	preAnalysis	none	none	360 NS	qt_5_3D9_man03	/Volumes/Promise RAID/Alf/for_Thea/experiments/quantification_test 5_3D9/3D9_5
48	189	15,899	360	NS	700,703,703,705,705,706,706,707,707,708,708,709,709,708,708,707,707,706,706,703,703,701,701,699,699,697,697,696,696,695,695,694,694,693,693,694,694,695,695,697,697,698,698,700,	992,992,993,993,994,994,995,995,996,996,997,997,1003,1003,1005,1005,1006,1006,1007,1007,1008,1008,1007,1007,1006,1006,1005,1005,1003,1003,1001,1001,999,999,998,998,994,994,993,993,992,992,991,991,	/Volumes/Promise RAID 2/Alf/for_Thea/experiments/quantification_test 5_3D9/str_data/NS/360/3D9_PMA_360NSimage_hoescht051.TIF 3D9_PMA_360NSimage_568050.tif	1750	15,899	0	preAnalysis	none	none	360 NS	qt_5_3D9_man03	/Volumes/Promise RAID/Alf/for_Thea/experiments/quantification_test 5_3D9/3D9_5
49	154	15,753	360	NS	412,413,413,414,414,415,415,414,414,413,413,412,412,410,410,405,405,403,403,402,402,403,403,405,405,407,407,410,410,412,	1003,1003,1004,1004,1005,1005,1012,1012,1014,1014,1015,1015,1016,1016,1017,1017,1016,1016,1014,1014,1007,1007,1005,1005,1004,1004,1003,1003,1002,1002,	/Volumes/Promise RAID 2/Alf/for_Thea/experiments/quantification_test 5_3D9/str_data/NS/360/3D9_PMA_360NSimage_hoescht051.TIF 3D9_PMA_360NSimage_568050.tif	1750	15,753	0	preAnalysis	none	none	360 NS	qt_5_3D9_man03	/Volumes/Promise RAID/Alf/for_Thea/experiments/quantification_test 5_3D9/3D9_5
50	227	13,656	360	NS	1225,1227,1227,1228,1228,1229,1229,1230,1230,1231,1231,1230,1230,1229,1229,1228,1228,1227,1227,1226,1226,1224,1224,1216,1216,1215,1215,1214,1214,1213,1213,1214,1214,1215,1215,1216,1216,1218,1218,1219,1219,1222,1222,1225,	3,3,4,4,5,5,6,6,9,9,11,11,14,14,15,15,16,16,17,17,18,18,19,19,18,18,16,16,15,15,10,10,8,8,6,6,5,5,4,4,3,3,2,2,	/Volumes/Promise RAID 2/Alf/for_Thea/experiments/quantification_test 5_3D9/str_data/NS/360/3D9_PMA_360NSimage_hoescht055.TIF 3D9_PMA_360NSimage_568054.tif	1750	13,656	0	preAnalysis	none	none	360 NS	qt_5_3D9_man03	/Volumes/Promise RAID/Alf/for_Thea/experiments/quantification_test 5_3D9/3D9_5
51	153	10,98	360	NS	102,108,108,110,110,111,111,112,112,111,111,109,109,104,104,102,102,100,100,98,98,96,96,95,95,96,96,97,97,98,98,101,101,102,	13,13,14,14,15,15,16,16,19,19,21,21,22,22,23,23,24,24,25,25,24,24,23,23,16,16,15,15,14,14,13,13,12,12,	/Volumes/Promise RAID 2/Alf/for_Thea/experiments/quantification_test 5_3D9/str_data/NS/360/3D9_PMA_360NSimage_hoescht055.TIF 3D9_PMA_360NSimage_568054.tif	1750	10,98	0	preAnalysis	none	none	360 NS	qt_5_3D9_man03	/Volumes/Promise RAID/Alf/for_Thea/experiments/quantification_test 5_3D9/3D9_5
52	209	16,12	360	NS	1169,1170,1170,1171,1171,1172,1172,1173,1173,1172,1172,1171,1171,1170,1170,1167,1167,1165,1165,1161,1161,1160,1160,1159,1159,1158,1158,1157,1157,1158,1158,1159,1159,1160,1160,1161,1161,1162,1162,1169,	40,40,41,41,42,42,44,44,52,52,53,53,54,54,55,55,56,56,55,55,54,54,53,53,52,52,48,48,47,47,44,44,42,42,41,41,40,40,39,39,	/Volumes/Promise RAID 2/Alf/for_Thea/experiments/quantification_test 5_3D9/str_data/NS/360/3D9_PMA_360NSimage_hoescht055.TIF 3D9_PMA_360NSimage_568054.tif	1750	16,12	0	preAnalysis	none	none	360 NS	qt_5_3D9_man03	/Volumes/Promise RAID/Alf/for_Thea/experiments/quantification_test 5_3D9/3D9_5
53	207	14,411	360	NS	1333,1334,1334,1335,1335,1336,1336,1335,1335,1334,1334,1333,1333,1331,1331,1329,1329,1322,1322,1320,1320,1319,1319,1320,1320,1321,1321,1322,1322,1323,1323,1325,1325,1333,	42,42,43,43,44,44,50,50,51,51,53,53,54,54,55,55,56,56,55,55,53,53,47,47,45,45,44,44,43,43,42,42,41,41,	/Volumes/Promise RAID 2/Alf/for_Thea/experiments/quantification_test 5_3D9/str_data/NS/360/3D9_PMA_360NSimage_hoescht055.TIF 3D9_PMA_360NSimage_568054.tif	1750	14,411	0	preAnalysis	none	none	360 NS	qt_5_3D9_man03	/Volumes/Promise RAID/Alf/for_Thea/experiments/quantification_test 5_3D9/3D9_5
54	148	13,236	360	NS	114,115,115,116,116,117,117,116,116,114,114,110,110,107,107,106,106,105,105,106,106,107,107,108,108,109,109,114,	45,45,46,46,48,48,57,57,58,58,59,59,58,58,57,57,54,54,49,49,47,47,46,46,45,45,44,44,	/Volumes/Promise RAID 2/Alf/for_Thea/experiments/quantification_test 5_3D9/str_data/NS/360/3D9_PMA_360NSimage_hoescht055.TIF 3D9_PMA_360NSimage_568054.tif	1750	13,236	0	preAnalysis	none	none	360 NS	qt_5_3D9_man03	/Volumes/Promise RAID/Alf/for_Thea/experiments/quantification_test 5_3D9/3D9_5
55	453	21,587	360	NS	544,547,547,548,548,549,549,550,550,549,549,548,548,549,549,548,548,547,547,545,545,544,544,542,542,537,537,534,534,533,533,532,532,531,531,532,532,533,533,532,532,533,533,534,534,536,536,544,	47,47,48,48,49,49,51,51,57,57,59,59,64,64,68,68,71,71,72,72,73,73,74,74,75,75,74,74,73,73,72,72,71,71,63,63,61,61,57,57,50,50,48,48,47,47,46,46,	/Volumes/Promise RAID 2/Alf/for_Thea/experiments/quantification_test 5_3D9/str_data/NS/360/3D9_PMA_360NSimage_hoescht055.TIF 3D9_PMA_360NSimage_568054.tif	1750	21,587	0	preAnalysis	none	none	360 NS	qt_5_3D9_man03	/Volumes/Promise RAID/Alf/for_Thea/experiments/quantification_test 5_3D9/3D9_5
56	249	15,964	360	NS	1103,1105,1105,1106,1106,1107,1107,1106,1106,1105,1105,1104,1104,1103,1103,1095,1095,1093,1093,1092,1092,1091,1091,1090,1090,1089,1089,1090,1090,1091,1091,1093,1093,1094,1094,1096,1096,1103,	62,62,63,63,65,65,73,73,75,75,76,76,77,77,78,78,77,77,76,76,75,75,74,74,73,73,68,68,66,66,64,64,63,63,62,62,61,61,	/Volumes/Promise RAID 2/Alf/for_Thea/experiments/quantification_test 5_3D9/str_data/NS/360/3D9_PMA_360NSimage_hoescht055.TIF 3D9_PMA_360NSimage_568054.tif	1750	15,964	0	preAnalysis	none	none	360 NS	qt_5_3D9_man03	/Volumes/Promise RAID/Alf/for_Thea/experiments/quantification_test 5_3D9/3D9_5
57	252	13,968	360	NS	1159,1160,1160,1161,1161,1162,1162,1163,1163,1164,1164,1163,1163,1162,1162,1161,1161,1159,1159,1157,1157,1153,1153,1150,1150,1149,1149,1148,1148,1147,1147,1146,1146,1147,1147,1148,1148,1149,1149,1150,1150,1151,1151,1153,1153,1159,	90,90,91,91,93,93,94,94,95,95,101,101,102,102,104,104,105,105,106,106,107,107,106,106,105,105,104,104,103,103,99,99,98,98,94,94,92,92,91,91,90,90,89,89,88,88,	/Volumes/Promise RAID 2/Alf/for_Thea/experiments/quantification_test 5_3D9/str_data/NS/360/3D9_PMA_360NSimage_hoescht055.TIF 3D9_PMA_360NSimage_568054.tif	1750	13,968	0	preAnalysis	none	none	360 NS	qt_5_3D9_man03	/Volumes/Promise RAID/Alf/for_Thea/experiments/quantification_test 5_3D9/3D9_5
58	217	14,023	360	NS	1179,1181,1181,1182,1182,1183,1183,1184,1184,1183,1183,1182,1182,1180,1180,1179,1179,1177,1177,1173,1173,1171,1171,1170,1170,1169,1169,1168,1168,1167,1167,1168,1168,1169,1169,1170,1170,1171,1171,1173,1173,1179,	95,95,96,96,98,98,99,99,103,103,106,106,107,107,108,108,109,109,110,110,111,111,110,110,109,109,108,108,107,107,100,100,98,98,97,97,96,96,95,95,94,94,	/Volumes/Promise RAID 2/Alf/for_Thea/experiments/quantification_test 5_3D9/str_data/NS/360/3D9_PMA_360NSimage_hoescht055.TIF 3D9_PMA_360NSimage_568054.tif	1750	14,023	0	preAnalysis	none	none	360 NS	qt_5_3D9_man03	/Volumes/Promise RAID/Alf/for_Thea/experiments/quantification_test 5_3D9/3D9_5
59	216	13,778	360	NS	379,381,381,382,382,384,384,385,385,386,386,387,387,386,386,385,385,383,383,381,381,377,377,374,374,372,372,371,371,370,370,371,371,372,372,373,373,375,375,379,	100,100,101,101,102,102,103,103,104,104,106,106,110,110,111,111,113,113,114,114,115,115,116,116,115,115,114,114,113,113,106,106,103,103,101,101,100,100,99,99,	/Volumes/Promise RAID 2/Alf/for_Thea/experiments/quantification_test 5_3D9/str_data/NS/360/3D9_PMA_360NSimage_hoescht055.TIF 3D9_PMA_360NSimage_568054.tif	1750	13,778	0	preAnalysis	none	none	360 NS	qt_5_3D9_man03	/Volumes/Promise RAID/Alf/for_Thea/experiments/quantification_test 5_3D9/3D9_5
60	162	6,222	360	NS	62,65,65,66,66,67,67,66,66,65,65,64,64,63,63,62,62,61,61,54,54,52,52,51,51,50,50,51,51,52,52,53,53,55,55,61,61,62,	117,117,118,118,120,120,123,123,124,124,125,125,126,126,127,127,128,128,129,129,128,128,127,127,126,126,121,121,120,120,119,119,118,118,117,117,116,116,	/Volumes/Promise RAID 2/Alf/for_Thea/experiments/quantification_test 5_3D9/str_data/NS/360/3D9_PMA_360NSimage_hoescht055.TIF 3D9_PMA_360NSimage_568054.tif	1750	6,222	0	preAnalysis	none	none	360 NS	qt_5_3D9_man03	/Volumes/Promise RAID/Alf/for_Thea/experiments/quantification_test 5_3D9/3D9_5
61	185	12,281	360	NS	193,201,201,203,203,204,204,205,205,204,204,203,203,202,202,200,200,198,198,192,192,191,191,190,190,189,189,190,190,191,191,192,192,193,	129,129,130,130,131,131,133,133,137,137,139,139,140,140,141,141,142,142,143,143,142,142,140,140,137,137,131,131,130,130,129,129,128,128,	/Volumes/Promise RAID 2/Alf/for_Thea/experiments/quantification_test 5_3D9/str_data/NS/360/3D9_PMA_360NSimage_hoescht055.TIF 3D9_PMA_360NSimage_568054.tif	1750	12,281	0	preAnalysis	none	none	360 NS	qt_5_3D9_man03	/Volumes/Promise RAID/Alf/for_Thea/experiments/quantification_test 5_3D9/3D9_5
62	217	14,548	360	NS	402,404,404,405,405,404,404,403,403,402,402,400,400,394,394,393,393,391,391,390,390,391,391,392,392,393,393,394,394,396,396,402,	144,144,146,146,150,150,157,157,158,158,160,160,161,161,160,160,159,159,157,157,150,150,148,148,146,146,145,145,144,144,143,143,	/Volumes/Promise RAID 2/Alf/for_Thea/experiments/quantification_test 5_3D9/str_data/NS/360/3D9_PMA_360NSimage_hoescht055.TIF 3D9_PMA_360NSimage_568054.tif	1750	14,548	0	preAnalysis	none	none	360 NS	qt_5_3D9_man03	/Volumes/Promise RAID/Alf/for_Thea/experiments/quantification_test 5_3D9/3D9_5
63	297	13,306	360	NS	871,874,874,877,877,878,878,880,880,881,881,882,882,883,883,882,882,881,881,880,880,878,878,877,877,876,876,874,874,867,867,866,866,865,865,864,864,863,863,862,862,861,861,862,862,861,861,862,862,864,864,866,866,871,	154,154,155,155,156,156,157,157,158,158,159,159,161,161,162,162,164,164,167,167,168,168,169,169,170,170,171,171,172,172,170,170,169,169,168,168,166,166,164,164,162,162,159,159,158,158,157,157,155,155,154,154,153,153,	/Volumes/Promise RAID 2/Alf/for_Thea/experiments/quantification_test 5_3D9/str_data/NS/360/3D9_PMA_360NSimage_hoescht055.TIF 3D9_PMA_360NSimage_568054.tif	1750	13,306	0	preAnalysis	none	none	360 NS	qt_5_3D9_man03	/Volumes/Promise RAID/Alf/for_Thea/experiments/quantification_test 5_3D9/3D9_5
64	294	14,898	360	NS	1158,1160,1160,1161,1161,1162,1162,1163,1163,1164,1164,1165,1165,1164,1164,1163,1163,1162,1162,1160,1160,1157,1157,1151,1151,1148,1148,1147,1147,1146,1146,1147,1147,1149,1149,1150,1150,1151,1151,1153,1153,1155,1155,1158,	187,187,188,188,189,189,190,190,192,192,194,194,199,199,201,201,203,203,204,204,205,205,206,206,205,205,204,204,202,202,193,193,191,191,190,190,189,189,188,188,187,187,186,186,	/Volumes/Promise RAID 2/Alf/for_Thea/experiments/quantification_test 5_3D9/str_data/NS/360/3D9_PMA_360NSimage_hoescht055.TIF 3D9_PMA_360NSimage_568054.tif	1750	14,898	0	preAnalysis	none	none	360 NS	qt_5_3D9_man03	/Volumes/Promise RAID/Alf/for_Thea/experiments/quantification_test 5_3D9/3D9_5
65	225	13,013	360	NS	385,386,386,387,387,386,386,385,385,384,384,382,382,375,375,372,372,371,371,370,370,369,369,370,370,371,371,372,372,374,374,385,	232,232,233,233,240,240,243,243,244,244,245,245,246,246,245,245,244,244,243,243,241,241,238,238,235,235,234,234,232,232,231,231,	/Volumes/Promise RAID 2/Alf/for_Thea/experiments/quantification_test 5_3D9/str_data/NS/360/3D9_PMA_360NSimage_hoescht055.TIF 3D9_PMA_360NSimage_568054.tif	1750	13,013	0	preAnalysis	none	none	360 NS	qt_5_3D9_man03	/Volumes/Promise RAID/Alf/for_Thea/experiments/quantification_test 5_3D9/3D9_5
66	399	15,308	360	NS	233,234,234,235,235,236,236,238,238,239,239,238,238,237,237,236,236,235,235,233,233,230,230,229,229,228,228,227,227,226,226,225,225,224,224,218,218,217,217,216,216,215,215,214,214,215,215,216,216,218,218,219,219,220,220,221,221,223,223,225,225,226,226,233,	245,245,246,246,247,247,248,248,249,249,253,253,255,255,257,257,260,260,261,261,262,262,263,263,264,264,265,265,266,266,267,267,268,268,269,269,268,268,267,267,266,266,262,262,260,260,257,257,255,255,254,254,253,253,248,248,247,247,246,246,245,245,244,244,	/Volumes/Promise RAID 2/Alf/for_Thea/experiments/quantification_test 5_3D9/str_data/NS/360/3D9_PMA_360NSimage_hoescht055.TIF 3D9_PMA_360NSimage_568054.tif	1750	15,308	0	preAnalysis	none	none	360 NS	qt_5_3D9_man03	/Volumes/Promise RAID/Alf/for_Thea/experiments/quantification_test 5_3D9/3D9_5
67	199	13,095	360	NS	286,287,287,288,288,289,289,290,290,291,291,290,290,289,289,288,288,284,284,278,278,277,277,276,276,275,275,274,274,275,275,276,276,277,277,279,279,286,	256,256,258,258,259,259,260,260,261,261,266,266,267,267,268,268,269,269,270,270,269,269,268,268,267,267,265,265,261,261,258,258,257,257,256,256,255,255,	/Volumes/Promise RAID 2/Alf/for_Thea/experiments/quantification_test 5_3D9/str_data/NS/360/3D9_PMA_360NSimage_hoescht055.TIF 3D9_PMA_360NSimage_568054.tif	1750	13,095	0	preAnalysis	none	none	360 NS	qt_5_3D9_man03	/Volumes/Promise RAID/Alf/for_Thea/experiments/quantification_test 5_3D9/3D9_5
68	295	15,132	360	NS	1284,1287,1287,1289,1289,1290,1290,1291,1291,1292,1292,1293,1293,1294,1294,1293,1293,1292,1292,1291,1291,1289,1289,1282,1282,1280,1280,1279,1279,1278,1278,1277,1277,1276,1276,1275,1275,1274,1274,1275,1275,1276,1276,1278,1278,1283,1283,1284,	259,259,260,260,262,262,263,263,264,264,266,266,268,268,273,273,275,275,276,276,277,277,278,278,277,277,276,276,275,275,274,274,272,272,270,270,268,268,263,263,262,262,260,260,259,259,258,258,	/Volumes/Promise RAID 2/Alf/for_Thea/experiments/quantification_test 5_3D9/str_data/NS/360/3D9_PMA_360NSimage_hoescht055.TIF 3D9_PMA_360NSimage_568054.tif	1750	15,132	0	preAnalysis	none	none	360 NS	qt_5_3D9_man03	/Volumes/Promise RAID/Alf/for_Thea/experiments/quantification_test 5_3D9/3D9_5
69	382	16,118	360	NS	369,371,371,372,372,376,376,377,377,381,381,382,382,383,383,384,384,383,383,382,382,381,381,379,379,377,377,375,375,370,370,368,368,361,361,360,360,359,359,358,358,357,357,356,356,357,357,358,358,359,359,360,360,362,362,363,363,369,	282,282,283,283,284,284,283,283,284,284,285,285,286,286,288,288,294,294,295,295,296,296,298,298,299,299,300,300,299,299,298,298,297,297,296,296,295,295,294,294,293,293,292,292,287,287,286,286,285,285,284,284,283,283,282,282,281,281,	/Volumes/Promise RAID 2/Alf/for_Thea/experiments/quantification_test 5_3D9/str_data/NS/360/3D9_PMA_360NSimage_hoescht055.TIF 3D9_PMA_360NSimage_568054.tif	1750	16,118	0	preAnalysis	none	none	360 NS	qt_5_3D9_man03	/Volumes/Promise RAID/Alf/for_Thea/experiments/quantification_test 5_3D9/3D9_5
70	253	17,292	360	NS	939,940,940,941,941,942,942,943,943,942,942,941,941,940,940,938,938,936,936,933,933,929,929,927,927,926,926,925,925,924,924,925,925,926,926,927,927,929,929,931,931,939,	298,298,299,299,300,300,303,303,307,307,310,310,311,311,312,312,313,313,314,314,313,313,312,312,311,311,310,310,309,309,302,302,301,301,300,300,299,299,298,298,297,297,	/Volumes/Promise RAID 2/Alf/for_Thea/experiments/quantification_test 5_3D9/str_data/NS/360/3D9_PMA_360NSimage_hoescht055.TIF 3D9_PMA_360NSimage_568054.tif	1750	17,292	0	preAnalysis	none	none	360 NS	qt_5_3D9_man03	/Volumes/Promise RAID/Alf/for_Thea/experiments/quantification_test 5_3D9/3D9_5
71	281	16,416	360	NS	1137,1139,1139,1141,1141,1142,1142,1143,1143,1144,1144,1143,1143,1142,1142,1141,1141,1139,1139,1133,1133,1131,1131,1129,1129,1128,1128,1127,1127,1126,1126,1125,1125,1124,1124,1125,1125,1126,1126,1128,1128,1129,1129,1132,1132,1137,	303,303,304,304,306,306,307,307,312,312,313,313,317,317,319,319,320,320,321,321,320,320,319,319,318,318,317,317,316,316,314,314,311,311,309,309,307,307,305,305,304,304,303,303,302,302,	/Volumes/Promise RAID 2/Alf/for_Thea/experiments/quantification_test 5_3D9/str_data/NS/360/3D9_PMA_360NSimage_hoescht055.TIF 3D9_PMA_360NSimage_568054.tif	1750	16,416	0	preAnalysis	none	none	360 NS	qt_5_3D9_man03	/Volumes/Promise RAID/Alf/for_Thea/experiments/quantification_test 5_3D9/3D9_5
72	204	17,093	360	NS	508,510,510,512,512,513,513,514,514,513,513,512,512,511,511,506,506,503,503,501,501,500,500,499,499,498,498,499,499,500,500,501,501,502,502,508,	309,309,310,310,312,312,314,314,321,321,322,322,323,323,324,324,323,323,322,322,321,321,320,320,318,318,312,312,311,311,310,310,309,309,308,308,	/Volumes/Promise RAID 2/Alf/for_Thea/experiments/quantification_test 5_3D9/str_data/NS/360/3D9_PMA_360NSimage_hoescht055.TIF 3D9_PMA_360NSimage_568054.tif	1750	17,093	0	preAnalysis	none	none	360 NS	qt_5_3D9_man03	/Volumes/Promise RAID/Alf/for_Thea/experiments/quantification_test 5_3D9/3D9_5
73	176	12,636	360	NS	197,200,200,201,201,202,202,203,203,202,202,201,201,200,200,192,192,191,191,190,190,189,189,190,190,191,191,192,192,193,193,196,196,197,	323,323,324,324,325,325,326,326,331,331,336,336,337,337,338,338,337,337,336,336,335,335,329,329,327,327,325,325,324,324,323,323,322,322,	/Volumes/Promise RAID 2/Alf/for_Thea/experiments/quantification_test 5_3D9/str_data/NS/360/3D9_PMA_360NSimage_hoescht055.TIF 3D9_PMA_360NSimage_568054.tif	1750	12,636	0	preAnalysis	none	none	360 NS	qt_5_3D9_man03	/Volumes/Promise RAID/Alf/for_Thea/experiments/quantification_test 5_3D9/3D9_5
74	233	16,871	360	NS	722,724,724,725,725,726,726,725,725,724,724,723,723,716,716,714,714,713,713,712,712,711,711,710,710,711,711,712,712,713,713,715,715,717,717,722,	343,343,344,344,346,346,356,356,358,358,359,359,360,360,359,359,358,358,357,357,356,356,355,355,350,350,348,348,346,346,344,344,343,343,342,342,	/Volumes/Promise RAID 2/Alf/for_Thea/experiments/quantification_test 5_3D9/str_data/NS/360/3D9_PMA_360NSimage_hoescht055.TIF 3D9_PMA_360NSimage_568054.tif	1750	16,871	0	preAnalysis	none	none	360 NS	qt_5_3D9_man03	/Volumes/Promise RAID/Alf/for_Thea/experiments/quantification_test 5_3D9/3D9_5
75	241	37,593	360	NS	555,557,557,558,558,559,559,560,560,559,559,558,558,557,557,556,556,555,555,551,551,550,550,546,546,545,545,544,544,543,543,544,544,545,545,546,546,547,547,549,549,550,550,555,	350,350,351,351,352,352,354,354,360,360,362,362,364,364,365,365,366,366,367,367,368,368,367,367,365,365,363,363,361,361,356,356,354,354,353,353,352,352,351,351,350,350,349,349,	/Volumes/Promise RAID 2/Alf/for_Thea/experiments/quantification_test 5_3D9/str_data/NS/360/3D9_PMA_360NSimage_hoescht055.TIF 3D9_PMA_360NSimage_568054.tif	1750	37,593	0	preAnalysis	none	none	360 NS	qt_5_3D9_man03	/Volumes/Promise RAID/Alf/for_Thea/experiments/quantification_test 5_3D9/3D9_5
76	205	14,429	360	NS	379,383,383,385,385,386,386,387,387,386,386,385,385,383,383,376,376,374,374,372,372,371,371,370,370,371,371,372,372,374,374,377,377,379,	357,357,358,358,359,359,360,360,368,368,369,369,370,370,371,371,370,370,369,369,368,368,367,367,361,361,359,359,358,358,357,357,356,356,	/Volumes/Promise RAID 2/Alf/for_Thea/experiments/quantification_test 5_3D9/str_data/NS/360/3D9_PMA_360NSimage_hoescht055.TIF 3D9_PMA_360NSimage_568054.tif	1750	14,429	0	preAnalysis	none	none	360 NS	qt_5_3D9_man03	/Volumes/Promise RAID/Alf/for_Thea/experiments/quantification_test 5_3D9/3D9_5
77	205	97,785	360	NS	596,598,598,600,600,601,601,602,602,603,603,604,604,603,603,602,602,600,600,598,598,595,595,592,592,590,590,589,589,588,588,587,587,588,588,589,589,590,590,596,	357,357,358,358,359,359,360,360,361,361,363,363,365,365,368,368,370,370,371,371,372,372,371,371,370,370,369,369,368,368,367,367,359,359,358,358,357,357,356,356,	/Volumes/Promise RAID 2/Alf/for_Thea/experiments/quantification_test 5_3D9/str_data/NS/360/3D9_PMA_360NSimage_hoescht055.TIF 3D9_PMA_360NSimage_568054.tif	1750	97,785	0	preAnalysis	none	none	360 NS	qt_5_3D9_man03	/Volumes/Promise RAID/Alf/for_Thea/experiments/quantification_test 5_3D9/3D9_5
78	300	15,86	360	NS	680,682,682,683,683,684,684,685,685,686,686,687,687,686,686,685,685,684,684,682,682,679,679,676,676,674,674,668,668,667,667,666,666,667,667,668,668,669,669,670,670,671,671,672,672,673,673,675,675,679,679,680,	359,359,360,360,361,361,364,364,366,366,369,369,370,370,373,373,374,374,375,375,376,376,377,377,378,378,379,379,378,378,376,376,373,373,368,368,366,366,365,365,363,363,362,362,361,361,360,360,359,359,358,358,	/Volumes/Promise RAID 2/Alf/for_Thea/experiments/quantification_test 5_3D9/str_data/NS/360/3D9_PMA_360NSimage_hoescht055.TIF 3D9_PMA_360NSimage_568054.tif	1750	15,86	0	preAnalysis	none	none	360 NS	qt_5_3D9_man03	/Volumes/Promise RAID/Alf/for_Thea/experiments/quantification_test 5_3D9/3D9_5
79	189	15,275	360	NS	406,408,408,409,409,410,410,409,409,408,408,407,407,405,405,403,403,399,399,397,397,396,396,395,395,396,396,397,397,398,398,399,399,400,400,406,	372,372,373,373,375,375,381,381,383,383,384,384,385,385,386,386,387,387,386,386,385,385,383,383,377,377,375,375,374,374,373,373,372,372,371,371,	/Volumes/Promise RAID 2/Alf/for_Thea/experiments/quantification_test 5_3D9/str_data/NS/360/3D9_PMA_360NSimage_hoescht055.TIF 3D9_PMA_360NSimage_568054.tif	1750	15,275	0	preAnalysis	none	none	360 NS	qt_5_3D9_man03	/Volumes/Promise RAID/Alf/for_Thea/experiments/quantification_test 5_3D9/3D9_5
80	232	14,987	360	NS	330,332,332,333,333,335,335,336,336,337,337,338,338,339,339,340,340,339,339,338,338,337,337,331,331,326,326,325,325,324,324,323,323,322,322,323,323,324,324,325,325,330,	385,385,386,386,387,387,388,388,390,390,392,392,394,394,395,395,398,398,400,400,401,401,402,402,401,401,400,400,398,398,396,396,391,391,389,389,386,386,385,385,384,384,	/Volumes/Promise RAID 2/Alf/for_Thea/experiments/quantification_test 5_3D9/str_data/NS/360/3D9_PMA_360NSimage_hoescht055.TIF 3D9_PMA_360NSimage_568054.tif	1750	14,987	0	preAnalysis	none	none	360 NS	qt_5_3D9_man03	/Volumes/Promise RAID/Alf/for_Thea/experiments/quantification_test 5_3D9/3D9_5
81	268	16,351	360	NS	907,908,908,909,909,910,910,911,911,912,912,913,913,912,912,911,911,910,910,908,908,907,907,901,901,899,899,897,897,896,896,895,895,896,896,897,897,898,898,899,899,907,	414,414,415,415,416,416,417,417,418,418,421,421,425,425,427,427,429,429,430,430,431,431,432,432,431,431,430,430,428,428,426,426,421,421,417,417,415,415,414,414,413,413,	/Volumes/Promise RAID 2/Alf/for_Thea/experiments/quantification_test 5_3D9/str_data/NS/360/3D9_PMA_360NSimage_hoescht055.TIF 3D9_PMA_360NSimage_568054.tif	1750	16,351	0	preAnalysis	none	none	360 NS	qt_5_3D9_man03	/Volumes/Promise RAID/Alf/for_Thea/experiments/quantification_test 5_3D9/3D9_5
82	222	5,55	360	NS	89,90,90,91,91,92,92,91,91,90,90,85,85,84,84,85,85,87,87,90,90,94,94,95,95,96,96,95,95,94,94,93,93,91,91,89,89,83,83,80,80,79,79,78,78,76,76,77,77,78,78,79,79,80,80,82,82,89,	423,423,424,424,425,425,427,427,428,428,429,429,430,430,431,431,432,432,433,433,432,432,433,433,434,434,436,436,437,437,438,438,439,439,440,440,439,439,438,438,437,437,436,436,435,435,429,429,428,428,426,426,424,424,423,423,422,422,	/Volumes/Promise RAID 2/Alf/for_Thea/experiments/quantification_test 5_3D9/str_data/NS/360/3D9_PMA_360NSimage_hoescht055.TIF 3D9_PMA_360NSimage_568054.tif	1750	5,55	0	preAnalysis	none	none	360 NS	qt_5_3D9_man03	/Volumes/Promise RAID/Alf/for_Thea/experiments/quantification_test 5_3D9/3D9_5
83	307	15,831	360	NS	1302,1305,1305,1306,1306,1307,1307,1308,1308,1307,1307,1306,1306,1305,1305,1304,1304,1303,1303,1302,1302,1301,1301,1298,1298,1296,1296,1291,1291,1290,1290,1289,1289,1288,1288,1289,1289,1290,1290,1291,1291,1292,1292,1293,1293,1295,1295,1296,1296,1300,1300,1302,	463,463,464,464,465,465,467,467,473,473,475,475,476,476,478,478,479,479,480,480,481,481,482,482,483,483,482,482,481,481,480,480,478,478,471,471,469,469,468,468,467,467,466,466,465,465,464,464,463,463,462,462,	/Volumes/Promise RAID 2/Alf/for_Thea/experiments/quantification_test 5_3D9/str_data/NS/360/3D9_PMA_360NSimage_hoescht055.TIF 3D9_PMA_360NSimage_568054.tif	1750	15,831	0	preAnalysis	none	none	360 NS	qt_5_3D9_man03	/Volumes/Promise RAID/Alf/for_Thea/experiments/quantification_test 5_3D9/3D9_5
84	296	15,784	360	NS	881,883,883,884,884,885,885,886,886,887,887,888,888,887,887,886,886,885,885,884,884,879,879,877,877,876,876,875,875,874,874,873,873,872,872,870,870,869,869,870,870,871,871,874,874,881,	479,479,480,480,481,481,482,482,483,483,485,485,494,494,496,496,497,497,498,498,499,499,498,498,497,497,495,495,494,494,492,492,491,491,489,489,486,486,481,481,480,480,479,479,478,478,	/Volumes/Promise RAID 2/Alf/for_Thea/experiments/quantification_test 5_3D9/str_data/NS/360/3D9_PMA_360NSimage_hoescht055.TIF 3D9_PMA_360NSimage_568054.tif	1750	15,784	0	preAnalysis	none	none	360 NS	qt_5_3D9_man03	/Volumes/Promise RAID/Alf/for_Thea/experiments/quantification_test 5_3D9/3D9_5
85	340	16,247	360	NS	378,380,380,381,381,383,383,384,384,385,385,386,386,385,385,384,384,383,383,384,384,383,383,378,378,377,377,375,375,377,377,379,379,380,380,383,383,381,381,380,380,378,378,375,375,373,373,372,372,371,371,370,370,372,372,370,370,371,371,370,370,369,369,368,368,369,369,370,370,371,371,372,372,373,373,371,371,370,370,369,369,370,370,371,371,373,373,378,	497,497,498,498,499,499,500,500,501,501,504,504,508,508,510,510,511,511,512,512,514,514,513,513,517,517,516,516,518,518,519,519,518,518,519,519,521,521,522,522,525,525,526,526,525,525,524,524,525,525,524,524,522,522,519,519,520,520,521,521,520,520,518,518,517,517,515,515,514,514,513,513,511,511,510,510,507,507,505,505,499,499,498,498,497,497,496,496,	/Volumes/Promise RAID 2/Alf/for_Thea/experiments/quantification_test 5_3D9/str_data/NS/360/3D9_PMA_360NSimage_hoescht055.TIF 3D9_PMA_360NSimage_568054.tif	1750	16,247	0	preAnalysis	none	none	360 NS	qt_5_3D9_man03	/Volumes/Promise RAID/Alf/for_Thea/experiments/quantification_test 5_3D9/3D9_5
86	150	15,5	360	NS	101,104,104,105,105,106,106,105,105,104,104,103,103,98,98,96,96,95,95,94,94,93,93,94,94,96,96,101,	498,498,499,499,500,500,508,508,509,509,510,510,511,511,510,510,509,509,507,507,506,506,500,500,498,498,497,497,	/Volumes/Promise RAID 2/Alf/for_Thea/experiments/quantification_test 5_3D9/str_data/NS/360/3D9_PMA_360NSimage_hoescht055.TIF 3D9_PMA_360NSimage_568054.tif	1750	15,5	0	preAnalysis	none	none	360 NS	qt_5_3D9_man03	/Volumes/Promise RAID/Alf/for_Thea/experiments/quantification_test 5_3D9/3D9_5
87	251	25,458	360	NS	534,535,535,538,538,539,539,540,540,541,541,542,542,543,543,544,544,543,543,542,542,541,541,539,539,537,537,535,535,534,534,529,529,528,528,527,527,528,528,529,529,530,530,531,531,533,533,534,	500,500,499,499,500,500,501,501,502,502,503,503,505,505,508,508,511,511,513,513,514,514,515,515,516,516,517,517,518,518,519,519,518,518,517,517,509,509,504,504,502,502,501,501,500,500,499,499,	/Volumes/Promise RAID 2/Alf/for_Thea/experiments/quantification_test 5_3D9/str_data/NS/360/3D9_PMA_360NSimage_hoescht055.TIF 3D9_PMA_360NSimage_568054.tif	1750	25,458	0	preAnalysis	none	none	360 NS	qt_5_3D9_man03	/Volumes/Promise RAID/Alf/for_Thea/experiments/quantification_test 5_3D9/3D9_5
88	341	15,358	360	NS	626,629,629,630,630,631,631,632,632,633,633,634,634,635,635,636,636,635,635,634,634,633,633,630,630,627,627,626,626,625,625,624,624,623,623,622,622,621,621,619,619,618,618,616,616,615,615,614,614,613,613,612,612,613,613,614,614,615,615,616,616,618,618,620,620,626,	502,502,503,503,504,504,505,505,507,507,509,509,511,511,515,515,516,516,521,521,522,522,523,523,522,522,521,521,517,517,518,518,517,517,518,518,516,516,517,517,518,518,517,517,516,516,515,515,514,514,510,510,509,509,507,507,505,505,504,504,503,503,502,502,501,501,	/Volumes/Promise RAID 2/Alf/for_Thea/experiments/quantification_test 5_3D9/str_data/NS/360/3D9_PMA_360NSimage_hoescht055.TIF 3D9_PMA_360NSimage_568054.tif	1750	15,358	0	preAnalysis	none	none	360 NS	qt_5_3D9_man03	/Volumes/Promise RAID/Alf/for_Thea/experiments/quantification_test 5_3D9/3D9_5
89	185	19,086	360	NS	408,409,409,410,410,411,411,410,410,409,409,407,407,402,402,400,400,399,399,398,398,397,397,396,396,397,397,398,398,399,399,400,400,401,401,404,404,408,	519,519,520,520,521,521,531,531,532,532,533,533,534,534,533,533,532,532,531,531,529,529,527,527,524,524,523,523,522,522,521,521,520,520,519,519,518,518,	/Volumes/Promise RAID 2/Alf/for_Thea/experiments/quantification_test 5_3D9/str_data/NS/360/3D9_PMA_360NSimage_hoescht055.TIF 3D9_PMA_360NSimage_568054.tif	1750	19,086	0	preAnalysis	none	none	360 NS	qt_5_3D9_man03	/Volumes/Promise RAID/Alf/for_Thea/experiments/quantification_test 5_3D9/3D9_5
90	229	17,223	360	NS	622,624,624,626,626,627,627,628,628,627,627,626,626,625,625,624,624,622,622,614,614,612,612,611,611,610,610,611,611,612,612,613,613,615,615,617,617,622,	534,534,535,535,536,536,537,537,543,543,545,545,546,546,547,547,548,548,549,549,548,548,547,547,545,545,540,540,538,538,536,536,535,535,534,534,533,533,	/Volumes/Promise RAID 2/Alf/for_Thea/experiments/quantification_test 5_3D9/str_data/NS/360/3D9_PMA_360NSimage_hoescht055.TIF 3D9_PMA_360NSimage_568054.tif	1750	17,223	0	preAnalysis	none	none	360 NS	qt_5_3D9_man03	/Volumes/Promise RAID/Alf/for_Thea/experiments/quantification_test 5_3D9/3D9_5
91	210	14,538	360	NS	241,242,242,243,243,245,245,246,246,248,248,252,252,255,255,256,256,257,257,258,258,257,257,256,256,255,255,243,243,241,241,239,239,238,238,237,237,236,236,237,237,238,238,240,240,241,	542,542,541,541,542,542,543,543,544,544,543,543,544,544,545,545,546,546,547,547,550,550,552,552,553,553,554,554,553,553,552,552,551,551,550,550,549,549,545,545,543,543,542,542,541,541,	/Volumes/Promise RAID 2/Alf/for_Thea/experiments/quantification_test 5_3D9/str_data/NS/360/3D9_PMA_360NSimage_hoescht055.TIF 3D9_PMA_360NSimage_568054.tif	1750	14,538	0	preAnalysis	none	none	360 NS	qt_5_3D9_man03	/Volumes/Promise RAID/Alf/for_Thea/experiments/quantification_test 5_3D9/3D9_5
92	265	15,642	360	NS	1337,1338,1338,1339,1339,1340,1340,1341,1341,1342,1342,1341,1341,1340,1340,1338,1338,1337,1337,1335,1335,1332,1332,1329,1329,1327,1327,1326,1326,1325,1325,1324,1324,1323,1323,1324,1324,1325,1325,1326,1326,1328,1328,1337,	544,544,545,545,546,546,548,548,549,549,553,553,556,556,558,558,559,559,560,560,561,561,560,560,559,559,558,558,557,557,556,556,554,554,547,547,546,546,545,545,544,544,543,543,	/Volumes/Promise RAID 2/Alf/for_Thea/experiments/quantification_test 5_3D9/str_data/NS/360/3D9_PMA_360NSimage_hoescht055.TIF 3D9_PMA_360NSimage_568054.tif	1750	15,642	0	preAnalysis	none	none	360 NS	qt_5_3D9_man03	/Volumes/Promise RAID/Alf/for_Thea/experiments/quantification_test 5_3D9/3D9_5
93	316	14,782	360	NS	1135,1138,1138,1139,1139,1141,1141,1142,1142,1141,1141,1140,1140,1139,1139,1138,1138,1137,1137,1135,1135,1131,1131,1130,1130,1127,1127,1125,1125,1124,1124,1123,1123,1122,1122,1121,1121,1122,1122,1123,1123,1124,1124,1125,1125,1127,1127,1135,	547,547,548,548,549,549,552,552,558,558,560,560,561,561,562,562,563,563,564,564,565,565,566,566,565,565,564,564,563,563,561,561,558,558,554,554,553,553,550,550,549,549,548,548,547,547,546,546,	/Volumes/Promise RAID 2/Alf/for_Thea/experiments/quantification_test 5_3D9/str_data/NS/360/3D9_PMA_360NSimage_hoescht055.TIF 3D9_PMA_360NSimage_568054.tif	1750	14,782	0	preAnalysis	none	none	360 NS	qt_5_3D9_man03	/Volumes/Promise RAID/Alf/for_Thea/experiments/quantification_test 5_3D9/3D9_5
94	409	12,244	360	NS	1328,1329,1329,1330,1330,1332,1332,1333,1333,1334,1334,1335,1335,1336,1336,1335,1335,1334,1334,1333,1333,1331,1331,1327,1327,1326,1326,1321,1321,1318,1318,1317,1317,1316,1316,1315,1315,1314,1314,1315,1315,1316,1316,1317,1317,1318,1318,1319,1319,1321,1321,1328,	566,566,567,567,568,568,569,569,570,570,571,571,574,574,583,583,585,585,586,586,587,587,588,588,589,589,588,588,587,587,586,586,585,585,584,584,582,582,578,578,576,576,569,569,568,568,567,567,566,566,565,565,	/Volumes/Promise RAID 2/Alf/for_Thea/experiments/quantification_test 5_3D9/str_data/NS/360/3D9_PMA_360NSimage_hoescht055.TIF 3D9_PMA_360NSimage_568054.tif	1750	12,244	0	preAnalysis	none	none	360 NS	qt_5_3D9_man03	/Volumes/Promise RAID/Alf/for_Thea/experiments/quantification_test 5_3D9/3D9_5
95	300	82,1	360	NS	313,315,315,317,317,319,319,320,320,321,321,322,322,323,323,322,322,320,320,310,310,309,309,307,307,306,306,305,305,304,304,303,303,302,302,301,301,302,302,310,310,313,	573,573,574,574,575,575,576,576,577,577,579,579,580,580,587,587,589,589,590,590,589,589,588,588,587,587,586,586,585,585,584,584,582,582,580,580,578,578,573,573,572,572,	/Volumes/Promise RAID 2/Alf/for_Thea/experiments/quantification_test 5_3D9/str_data/NS/360/3D9_PMA_360NSimage_hoescht055.TIF 3D9_PMA_360NSimage_568054.tif	1750	82,1	0	preAnalysis	none	none	360 NS	qt_5_3D9_man03	/Volumes/Promise RAID/Alf/for_Thea/experiments/quantification_test 5_3D9/3D9_5
96	216	14,296	360	NS	404,406,406,407,407,408,408,409,409,410,410,409,409,408,408,407,407,406,406,405,405,400,400,397,397,396,396,395,395,394,394,393,393,394,394,395,395,396,396,397,397,398,398,404,	574,574,575,575,576,576,577,577,579,579,584,584,585,585,586,586,588,588,589,589,590,590,589,589,588,588,587,587,585,585,583,583,580,580,578,578,576,576,575,575,574,574,573,573,	/Volumes/Promise RAID 2/Alf/for_Thea/experiments/quantification_test 5_3D9/str_data/NS/360/3D9_PMA_360NSimage_hoescht055.TIF 3D9_PMA_360NSimage_568054.tif	1750	14,296	0	preAnalysis	none	none	360 NS	qt_5_3D9_man03	/Volumes/Promise RAID/Alf/for_Thea/experiments/quantification_test 5_3D9/3D9_5
97	206	12,194	360	NS	137,138,138,139,139,138,138,137,137,136,136,135,135,134,134,132,132,129,129,127,127,126,126,123,123,122,122,120,120,119,119,118,118,119,119,120,120,121,121,122,122,129,129,131,131,132,132,134,134,137,	581,581,582,582,586,586,587,587,588,588,589,589,590,590,591,591,592,592,595,595,596,596,598,598,597,597,596,596,595,595,594,594,590,590,588,588,586,586,585,585,584,584,583,583,582,582,581,581,580,580,	/Volumes/Promise RAID 2/Alf/for_Thea/experiments/quantification_test 5_3D9/str_data/NS/360/3D9_PMA_360NSimage_hoescht055.TIF 3D9_PMA_360NSimage_568054.tif	1750	12,194	0	preAnalysis	none	none	360 NS	qt_5_3D9_man03	/Volumes/Promise RAID/Alf/for_Thea/experiments/quantification_test 5_3D9/3D9_5
98	333	14,703	360	NS	1093,1095,1095,1096,1096,1097,1097,1096,1096,1095,1095,1094,1094,1093,1093,1092,1092,1090,1090,1084,1084,1082,1082,1081,1081,1080,1080,1079,1079,1078,1078,1077,1077,1078,1078,1079,1079,1080,1080,1082,1082,1084,1084,1090,1090,1093,	606,606,607,607,609,609,618,618,621,621,622,622,623,623,624,624,625,625,626,626,625,625,624,624,623,623,622,622,621,621,620,620,612,612,611,611,609,609,608,608,607,607,606,606,605,605,	/Volumes/Promise RAID 2/Alf/for_Thea/experiments/quantification_test 5_3D9/str_data/NS/360/3D9_PMA_360NSimage_hoescht055.TIF 3D9_PMA_360NSimage_568054.tif	1750	14,703	0	preAnalysis	none	none	360 NS	qt_5_3D9_man03	/Volumes/Promise RAID/Alf/for_Thea/experiments/quantification_test 5_3D9/3D9_5
99	255	16,71	360	NS	770,771,771,772,772,773,773,774,774,773,773,772,772,771,771,770,770,766,766,756,756,755,755,754,754,753,753,754,754,755,755,757,757,758,758,759,759,770,	607,607,608,608,609,609,611,611,614,614,617,617,618,618,619,619,620,620,621,621,620,620,619,619,617,617,614,614,611,611,609,609,608,608,607,607,606,606,	/Volumes/Promise RAID 2/Alf/for_Thea/experiments/quantification_test 5_3D9/str_data/NS/360/3D9_PMA_360NSimage_hoescht055.TIF 3D9_PMA_360NSimage_568054.tif	1750	16,71	0	preAnalysis	none	none	360 NS	qt_5_3D9_man03	/Volumes/Promise RAID/Alf/for_Thea/experiments/quantification_test 5_3D9/3D9_5
100	185	14,697	360	NS	294,297,297,298,298,299,299,300,300,301,301,302,302,301,301,300,300,298,298,297,297,291,291,290,290,289,289,288,288,287,287,288,288,289,289,290,290,292,292,294,	627,627,628,628,629,629,631,631,632,632,634,634,638,638,640,640,641,641,642,642,643,643,642,642,641,641,639,639,636,636,634,634,630,630,628,628,627,627,626,626,	/Volumes/Promise RAID 2/Alf/for_Thea/experiments/quantification_test 5_3D9/str_data/NS/360/3D9_PMA_360NSimage_hoescht055.TIF 3D9_PMA_360NSimage_568054.tif	1750	14,697	0	preAnalysis	none	none	360 NS	qt_5_3D9_man03	/Volumes/Promise RAID/Alf/for_Thea/experiments/quantification_test 5_3D9/3D9_5
101	323	14,864	360	NS	1296,1298,1298,1299,1299,1300,1300,1301,1301,1302,1302,1303,1303,1302,1302,1301,1301,1300,1300,1299,1299,1298,1298,1295,1295,1289,1289,1287,1287,1285,1285,1284,1284,1283,1283,1282,1282,1281,1281,1283,1283,1284,1284,1287,1287,1290,1290,1296,	652,652,653,653,654,654,655,655,656,656,659,659,661,661,665,665,666,666,667,667,668,668,669,669,670,670,669,669,668,668,667,667,666,666,665,665,663,663,655,655,654,654,653,653,652,652,651,651,	/Volumes/Promise RAID 2/Alf/for_Thea/experiments/quantification_test 5_3D9/str_data/NS/360/3D9_PMA_360NSimage_hoescht055.TIF 3D9_PMA_360NSimage_568054.tif	1750	14,864	0	preAnalysis	none	none	360 NS	qt_5_3D9_man03	/Volumes/Promise RAID/Alf/for_Thea/experiments/quantification_test 5_3D9/3D9_5
102	948	19,402	360	NS	78,80,80,82,82,84,84,89,89,90,90,91,91,90,90,89,89,88,88,87,87,86,86,85,85,87,87,88,88,91,91,93,93,95,95,96,96,97,97,96,96,97,97,96,96,95,95,94,94,89,89,88,88,87,87,86,86,85,85,84,84,83,83,84,84,82,82,78,78,77,77,75,75,73,73,71,71,70,70,63,63,62,62,61,61,59,59,56,56,54,54,53,53,54,54,55,55,57,57,61,61,62,62,63,63,64,64,65,65,66,66,69,69,71,71,72,72,75,75,76,76,74,74,75,75,74,74,73,73,71,71,70,70,…	663,663,664,664,663,663,662,662,663,663,665,665,668,668,671,671,672,672,673,673,674,674,675,675,677,677,678,678,679,679,678,678,679,679,680,680,681,681,683,683,686,686,690,690,692,692,693,693,694,694,693,693,692,692,693,693,694,694,699,699,701,701,702,702,703,703,702,702,701,701,700,700,699,699,698,698,697,697,696,696,695,695,694,694,693,693,692,692,691,691,689,689,685,685,684,684,682,682,681,681…	/Volumes/Promise RAID 2/Alf/for_Thea/experiments/quantification_test 5_3D9/str_data/NS/360/3D9_PMA_360NSimage_hoescht055.TIF 3D9_PMA_360NSimage_568054.tif	1750	19,402	0	preAnalysis	none	none	360 NS	qt_5_3D9_man03	/Volumes/Promise RAID/Alf/for_Thea/experiments/quantification_test 5_3D9/3D9_5
103	304	17,079	360	NS	947,950,950,952,952,954,954,955,955,956,956,955,955,954,954,953,953,951,951,949,949,942,942,939,939,937,937,936,936,934,934,933,933,934,934,935,935,936,936,937,937,938,938,940,940,947,	688,688,689,689,690,690,691,691,692,692,699,699,700,700,701,701,702,702,703,703,704,704,703,703,702,702,701,701,700,700,698,698,694,694,692,692,691,691,690,690,689,689,688,688,687,687,	/Volumes/Promise RAID 2/Alf/for_Thea/experiments/quantification_test 5_3D9/str_data/NS/360/3D9_PMA_360NSimage_hoescht055.TIF 3D9_PMA_360NSimage_568054.tif	1750	17,079	0	preAnalysis	none	none	360 NS	qt_5_3D9_man03	/Volumes/Promise RAID/Alf/for_Thea/experiments/quantification_test 5_3D9/3D9_5
104	203	16,768	360	NS	564,565,565,567,567,568,568,567,567,566,566,565,565,564,564,561,561,558,558,555,555,554,554,553,553,552,552,553,553,554,554,556,556,564,	704,704,705,705,707,707,713,713,715,715,716,716,717,717,718,718,719,719,718,718,717,717,715,715,712,712,708,708,706,706,704,704,703,703,	/Volumes/Promise RAID 2/Alf/for_Thea/experiments/quantification_test 5_3D9/str_data/NS/360/3D9_PMA_360NSimage_hoescht055.TIF 3D9_PMA_360NSimage_568054.tif	1750	16,768	0	preAnalysis	none	none	360 NS	qt_5_3D9_man03	/Volumes/Promise RAID/Alf/for_Thea/experiments/quantification_test 5_3D9/3D9_5
105	162	16,525	360	NS	198,199,199,202,202,204,204,205,205,204,204,203,203,202,202,197,197,194,194,191,191,190,190,189,189,190,190,191,191,192,192,198,	728,728,729,729,730,730,731,731,736,736,737,737,738,738,739,739,740,740,739,739,738,738,736,736,730,730,729,729,728,728,727,727,	/Volumes/Promise RAID 2/Alf/for_Thea/experiments/quantification_test 5_3D9/str_data/NS/360/3D9_PMA_360NSimage_hoescht055.TIF 3D9_PMA_360NSimage_568054.tif	1750	16,525	0	preAnalysis	none	none	360 NS	qt_5_3D9_man03	/Volumes/Promise RAID/Alf/for_Thea/experiments/quantification_test 5_3D9/3D9_5
106	427	41,838	360	NS	142,143,143,144,144,145,145,146,146,147,147,148,148,149,149,151,151,153,153,155,155,156,156,158,158,159,159,160,160,158,158,157,157,156,156,153,153,152,152,150,150,147,147,146,146,145,145,144,144,145,145,141,141,140,140,139,139,138,138,137,137,135,135,131,131,130,130,128,128,127,127,128,128,129,129,128,128,129,129,133,133,134,134,136,136,142,	736,736,737,737,740,740,741,741,740,740,738,738,736,736,737,737,738,738,739,739,740,740,741,741,742,742,743,743,749,749,752,752,753,753,754,754,755,755,754,754,753,753,752,752,751,751,749,749,748,748,747,747,749,749,748,748,749,749,750,750,751,751,752,752,751,751,750,750,749,749,744,744,741,741,740,740,739,739,738,738,737,737,736,736,735,735,	/Volumes/Promise RAID 2/Alf/for_Thea/experiments/quantification_test 5_3D9/str_data/NS/360/3D9_PMA_360NSimage_hoescht055.TIF 3D9_PMA_360NSimage_568054.tif	1750	41,838	0	preAnalysis	none	none	360 NS	qt_5_3D9_man03	/Volumes/Promise RAID/Alf/for_Thea/experiments/quantification_test 5_3D9/3D9_5
107	359	16,593	360	NS	946,950,950,951,951,953,953,955,955,956,956,958,958,959,959,960,960,961,961,962,962,963,963,962,962,961,961,960,960,958,958,954,954,951,951,950,950,947,947,943,943,941,941,940,940,939,939,938,938,937,937,938,938,939,939,940,940,942,942,946,	737,737,738,738,739,739,740,740,741,741,742,742,743,743,744,744,745,745,746,746,748,748,750,750,754,754,755,755,756,756,757,757,756,756,755,755,754,754,753,753,752,752,751,751,750,750,748,748,745,745,744,744,740,740,738,738,737,737,736,736,	/Volumes/Promise RAID 2/Alf/for_Thea/experiments/quantification_test 5_3D9/str_data/NS/360/3D9_PMA_360NSimage_hoescht055.TIF 3D9_PMA_360NSimage_568054.tif	1750	16,593	0	preAnalysis	none	none	360 NS	qt_5_3D9_man03	/Volumes/Promise RAID/Alf/for_Thea/experiments/quantification_test 5_3D9/3D9_5
108	213	17,878	360	NS	744,747,747,749,749,750,750,751,751,752,752,751,751,750,750,749,749,748,748,747,747,746,746,741,741,739,739,738,738,737,737,736,736,735,735,736,736,737,737,738,738,740,740,744,	754,754,755,755,756,756,757,757,759,759,762,762,765,765,766,766,767,767,768,768,769,769,770,770,769,769,768,768,767,767,765,765,762,762,759,759,756,756,755,755,754,754,753,753,	/Volumes/Promise RAID 2/Alf/for_Thea/experiments/quantification_test 5_3D9/str_data/NS/360/3D9_PMA_360NSimage_hoescht055.TIF 3D9_PMA_360NSimage_568054.tif	1750	17,878	0	preAnalysis	none	none	360 NS	qt_5_3D9_man03	/Volumes/Promise RAID/Alf/for_Thea/experiments/quantification_test 5_3D9/3D9_5
109	726	51,508	360	NS	166,173,173,175,175,177,177,178,178,184,184,186,186,188,188,189,189,193,193,199,199,200,200,201,201,202,202,203,203,204,204,205,205,206,206,207,207,208,208,209,209,210,210,211,211,212,212,213,213,214,214,215,215,216,216,217,217,218,218,219,219,220,220,221,221,222,222,223,223,224,224,226,226,227,227,228,228,229,229,231,231,232,232,233,233,234,234,236,236,234,234,233,233,231,231,230,230,229,229,228…	758,758,759,759,762,762,764,764,766,766,767,767,768,768,769,769,770,770,769,769,770,770,771,771,772,772,773,773,774,774,775,775,776,776,778,778,779,779,780,780,781,781,782,782,783,783,784,784,785,785,786,786,787,787,788,788,789,789,790,790,791,791,792,792,793,793,794,794,795,795,796,796,797,797,798,798,799,799,800,800,801,801,802,802,803,803,804,804,805,805,804,804,803,803,802,802,801,801,800,800…	/Volumes/Promise RAID 2/Alf/for_Thea/experiments/quantification_test 5_3D9/str_data/NS/360/3D9_PMA_360NSimage_hoescht055.TIF 3D9_PMA_360NSimage_568054.tif	1750	51,508	0	preAnalysis	none	none	360 NS	qt_5_3D9_man03	/Volumes/Promise RAID/Alf/for_Thea/experiments/quantification_test 5_3D9/3D9_5
110	220	31,059	360	NS	94,95,95,96,96,99,99,100,100,101,101,102,102,100,100,99,99,98,98,92,92,90,90,88,88,87,87,86,86,85,85,86,86,87,87,86,86,87,87,88,88,93,93,94,	763,763,764,764,765,765,766,766,767,767,770,770,775,775,776,776,777,777,778,778,777,777,776,776,775,775,774,774,773,773,771,771,768,768,767,767,762,762,761,761,760,760,759,759,	/Volumes/Promise RAID 2/Alf/for_Thea/experiments/quantification_test 5_3D9/str_data/NS/360/3D9_PMA_360NSimage_hoescht055.TIF 3D9_PMA_360NSimage_568054.tif	1750	31,059	0	preAnalysis	none	none	360 NS	qt_5_3D9_man03	/Volumes/Promise RAID/Alf/for_Thea/experiments/quantification_test 5_3D9/3D9_5
111	265	20,125	360	NS	991,993,993,994,994,996,996,997,997,998,998,997,997,996,996,995,995,994,994,992,992,986,986,983,983,982,982,980,980,979,979,980,980,981,981,982,982,983,983,986,986,991,	766,766,767,767,768,768,770,770,772,772,775,775,779,779,780,780,781,781,782,782,783,783,782,782,781,781,780,780,777,777,771,771,770,770,768,768,767,767,766,766,765,765,	/Volumes/Promise RAID 2/Alf/for_Thea/experiments/quantification_test 5_3D9/str_data/NS/360/3D9_PMA_360NSimage_hoescht055.TIF 3D9_PMA_360NSimage_568054.tif	1750	20,125	0	preAnalysis	none	none	360 NS	qt_5_3D9_man03	/Volumes/Promise RAID/Alf/for_Thea/experiments/quantification_test 5_3D9/3D9_5
112	324	16,364	360	NS	1136,1137,1137,1138,1138,1139,1139,1140,1140,1141,1141,1142,1142,1143,1143,1142,1142,1143,1143,1142,1142,1141,1141,1140,1140,1138,1138,1135,1135,1134,1134,1133,1133,1132,1132,1129,1129,1127,1127,1125,1125,1124,1124,1123,1123,1122,1122,1123,1123,1124,1124,1125,1125,1126,1126,1127,1127,1128,1128,1130,1130,1131,1131,1136,	768,768,769,769,770,770,772,772,773,773,774,774,778,778,780,780,781,781,782,782,784,784,786,786,787,787,788,788,789,789,788,788,789,789,788,788,787,787,786,786,784,784,783,783,780,780,778,778,775,775,774,774,773,773,772,772,771,771,769,769,768,768,767,767,	/Volumes/Promise RAID 2/Alf/for_Thea/experiments/quantification_test 5_3D9/str_data/NS/360/3D9_PMA_360NSimage_hoescht055.TIF 3D9_PMA_360NSimage_568054.tif	1750	16,364	0	preAnalysis	none	none	360 NS	qt_5_3D9_man03	/Volumes/Promise RAID/Alf/for_Thea/experiments/quantification_test 5_3D9/3D9_5
113	209	15,593	360	NS	420,422,422,423,423,424,424,425,425,424,424,423,423,422,422,420,420,417,417,415,415,414,414,413,413,412,412,411,411,412,412,413,413,414,414,415,415,420,	774,774,776,776,777,777,779,779,788,788,789,789,790,790,791,791,792,792,791,791,790,790,789,789,787,787,783,783,777,777,776,776,775,775,774,774,773,773,	/Volumes/Promise RAID 2/Alf/for_Thea/experiments/quantification_test 5_3D9/str_data/NS/360/3D9_PMA_360NSimage_hoescht055.TIF 3D9_PMA_360NSimage_568054.tif	1750	15,593	0	preAnalysis	none	none	360 NS	qt_5_3D9_man03	/Volumes/Promise RAID/Alf/for_Thea/experiments/quantification_test 5_3D9/3D9_5
114	213	38,207	360	NS	253,254,254,257,257,259,259,264,264,267,267,268,268,267,267,266,266,265,265,261,261,259,259,253,253,252,252,251,251,250,250,251,251,252,252,253,253,252,252,253,	807,807,808,808,809,809,810,810,811,811,813,813,818,818,819,819,820,820,821,821,822,822,823,823,822,822,821,821,819,819,811,811,809,809,808,808,807,807,806,806,	/Volumes/Promise RAID 2/Alf/for_Thea/experiments/quantification_test 5_3D9/str_data/NS/360/3D9_PMA_360NSimage_hoescht055.TIF 3D9_PMA_360NSimage_568054.tif	1750	38,207	0	preAnalysis	none	none	360 NS	qt_5_3D9_man03	/Volumes/Promise RAID/Alf/for_Thea/experiments/quantification_test 5_3D9/3D9_5
115	476	16,935	360	NS	711,712,712,713,713,714,714,715,715,716,716,720,720,722,722,723,723,724,724,725,725,724,724,723,723,721,721,719,719,717,717,716,716,713,713,711,711,710,710,709,709,708,708,707,707,704,704,701,701,700,700,699,699,698,698,697,697,696,696,697,697,698,698,699,699,700,700,702,702,704,704,711,	808,808,809,809,810,810,811,811,812,812,813,813,814,814,815,815,816,816,818,818,827,827,829,829,830,830,831,831,832,832,831,831,832,832,831,831,830,830,829,829,828,828,826,826,824,824,823,823,822,822,821,821,820,820,819,819,818,818,814,814,812,812,811,811,810,810,809,809,808,808,807,807,	/Volumes/Promise RAID 2/Alf/for_Thea/experiments/quantification_test 5_3D9/str_data/NS/360/3D9_PMA_360NSimage_hoescht055.TIF 3D9_PMA_360NSimage_568054.tif	1750	16,935	0	preAnalysis	none	none	360 NS	qt_5_3D9_man03	/Volumes/Promise RAID/Alf/for_Thea/experiments/quantification_test 5_3D9/3D9_5
116	190	11,705	360	NS	234,235,235,236,236,237,237,238,238,239,239,240,240,241,241,242,242,241,241,236,236,234,234,232,232,229,229,228,228,226,226,225,225,224,224,225,225,227,227,229,229,234,	820,820,821,821,823,823,826,826,829,829,831,831,832,832,833,833,835,835,836,836,835,835,834,834,833,833,832,832,831,831,830,830,828,828,822,822,821,821,820,820,819,819,	/Volumes/Promise RAID 2/Alf/for_Thea/experiments/quantification_test 5_3D9/str_data/NS/360/3D9_PMA_360NSimage_hoescht055.TIF 3D9_PMA_360NSimage_568054.tif	1750	11,705	0	preAnalysis	none	none	360 NS	qt_5_3D9_man03	/Volumes/Promise RAID/Alf/for_Thea/experiments/quantification_test 5_3D9/3D9_5
117	175	15,897	360	NS	342,344,344,346,346,347,347,346,346,344,344,342,342,340,340,337,337,335,335,334,334,333,333,334,334,335,335,336,336,338,338,342,	826,826,827,827,829,829,836,836,839,839,840,840,841,841,840,840,839,839,838,838,836,836,830,830,829,829,827,827,826,826,825,825,	/Volumes/Promise RAID 2/Alf/for_Thea/experiments/quantification_test 5_3D9/str_data/NS/360/3D9_PMA_360NSimage_hoescht055.TIF 3D9_PMA_360NSimage_568054.tif	1750	15,897	0	preAnalysis	none	none	360 NS	qt_5_3D9_man03	/Volumes/Promise RAID/Alf/for_Thea/experiments/quantification_test 5_3D9/3D9_5
118	250	18,916	360	NS	1018,1019,1019,1020,1020,1021,1021,1022,1022,1023,1023,1022,1022,1021,1021,1020,1020,1018,1018,1017,1017,1010,1010,1008,1008,1007,1007,1006,1006,1005,1005,1004,1004,1005,1005,1006,1006,1007,1007,1008,1008,1010,1010,1018,	847,847,848,848,849,849,851,851,854,854,855,855,858,858,860,860,861,861,862,862,863,863,862,862,861,861,860,860,859,859,857,857,851,851,850,850,849,849,848,848,847,847,846,846,	/Volumes/Promise RAID 2/Alf/for_Thea/experiments/quantification_test 5_3D9/str_data/NS/360/3D9_PMA_360NSimage_hoescht055.TIF 3D9_PMA_360NSimage_568054.tif	1750	18,916	0	preAnalysis	none	none	360 NS	qt_5_3D9_man03	/Volumes/Promise RAID/Alf/for_Thea/experiments/quantification_test 5_3D9/3D9_5
119	192	13,083	360	NS	275,276,276,279,279,280,280,281,281,282,282,281,281,280,280,279,279,273,273,272,272,270,270,269,269,268,268,267,267,268,268,269,269,271,271,272,272,275,	850,850,851,851,852,852,855,855,856,856,862,862,864,864,865,865,866,866,865,865,864,864,863,863,861,861,859,859,854,854,852,852,851,851,850,850,849,849,	/Volumes/Promise RAID 2/Alf/for_Thea/experiments/quantification_test 5_3D9/str_data/NS/360/3D9_PMA_360NSimage_hoescht055.TIF 3D9_PMA_360NSimage_568054.tif	1750	13,083	0	preAnalysis	none	none	360 NS	qt_5_3D9_man03	/Volumes/Promise RAID/Alf/for_Thea/experiments/quantification_test 5_3D9/3D9_5
120	174	13,977	360	NS	234,235,235,236,236,237,237,236,236,235,235,234,234,233,233,231,231,226,226,225,225,224,224,223,223,222,222,223,223,224,224,226,226,234,	894,894,895,895,897,897,900,900,903,903,904,904,906,906,907,907,908,908,907,907,906,906,905,905,902,902,899,899,896,896,894,894,893,893,	/Volumes/Promise RAID 2/Alf/for_Thea/experiments/quantification_test 5_3D9/str_data/NS/360/3D9_PMA_360NSimage_hoescht055.TIF 3D9_PMA_360NSimage_568054.tif	1750	13,977	0	preAnalysis	none	none	360 NS	qt_5_3D9_man03	/Volumes/Promise RAID/Alf/for_Thea/experiments/quantification_test 5_3D9/3D9_5
121	178	14,292	360	NS	304,305,305,306,306,305,305,304,304,303,303,301,301,299,299,294,294,293,293,292,292,291,291,290,290,291,291,292,292,293,293,294,294,304,	904,904,905,905,911,911,913,913,914,914,915,915,916,916,917,917,916,916,915,915,913,913,911,911,908,908,906,906,905,905,904,904,903,903,	/Volumes/Promise RAID 2/Alf/for_Thea/experiments/quantification_test 5_3D9/str_data/NS/360/3D9_PMA_360NSimage_hoescht055.TIF 3D9_PMA_360NSimage_568054.tif	1750	14,292	0	preAnalysis	none	none	360 NS	qt_5_3D9_man03	/Volumes/Promise RAID/Alf/for_Thea/experiments/quantification_test 5_3D9/3D9_5
122	370	13,827	360	NS	1153,1154,1154,1155,1155,1156,1156,1157,1157,1156,1156,1155,1155,1154,1154,1152,1152,1148,1148,1147,1147,1143,1143,1142,1142,1141,1141,1140,1140,1139,1139,1138,1138,1139,1139,1140,1140,1141,1141,1142,1142,1143,1143,1145,1145,1153,	921,921,922,922,923,923,926,926,934,934,937,937,939,939,942,942,944,944,945,945,944,944,943,943,942,942,941,941,939,939,936,936,933,933,926,926,924,924,923,923,922,922,921,921,920,920,	/Volumes/Promise RAID 2/Alf/for_Thea/experiments/quantification_test 5_3D9/str_data/NS/360/3D9_PMA_360NSimage_hoescht055.TIF 3D9_PMA_360NSimage_568054.tif	1750	13,827	0	preAnalysis	none	none	360 NS	qt_5_3D9_man03	/Volumes/Promise RAID/Alf/for_Thea/experiments/quantification_test 5_3D9/3D9_5
123	310	14,677	360	NS	838,840,840,842,842,843,843,844,844,845,845,846,846,845,845,844,844,843,843,842,842,840,840,837,837,833,833,831,831,829,829,828,828,827,827,826,826,827,827,828,828,829,829,830,830,831,831,833,833,835,835,838,	973,973,974,974,975,975,976,976,977,977,980,980,983,983,987,987,988,988,990,990,991,991,992,992,993,993,992,992,991,991,990,990,989,989,986,986,981,981,978,978,977,977,976,976,975,975,974,974,973,973,972,972,	/Volumes/Promise RAID 2/Alf/for_Thea/experiments/quantification_test 5_3D9/str_data/NS/360/3D9_PMA_360NSimage_hoescht055.TIF 3D9_PMA_360NSimage_568054.tif	1750	14,677	0	preAnalysis	none	none	360 NS	qt_5_3D9_man03	/Volumes/Promise RAID/Alf/for_Thea/experiments/quantification_test 5_3D9/3D9_5
124	284	17,338	360	NS	1050,1053,1053,1055,1055,1057,1057,1058,1058,1059,1059,1060,1060,1061,1061,1060,1060,1059,1059,1056,1056,1054,1054,1050,1050,1047,1047,1046,1046,1045,1045,1044,1044,1043,1043,1042,1042,1041,1041,1042,1042,1043,1043,1045,1045,1050,	986,986,987,987,988,988,989,989,991,991,992,992,996,996,999,999,1001,1001,1002,1002,1003,1003,1004,1004,1003,1003,1002,1002,1001,1001,1000,1000,999,999,998,998,996,996,989,989,987,987,986,986,985,985,	/Volumes/Promise RAID 2/Alf/for_Thea/experiments/quantification_test 5_3D9/str_data/NS/360/3D9_PMA_360NSimage_hoescht055.TIF 3D9_PMA_360NSimage_568054.tif	1750	17,338	0	preAnalysis	none	none	360 NS	qt_5_3D9_man03	/Volumes/Promise RAID/Alf/for_Thea/experiments/quantification_test 5_3D9/3D9_5
125	269	13,078	360	NS	1301,1303,1303,1304,1304,1305,1305,1306,1306,1307,1307,1306,1306,1305,1305,1304,1304,1302,1302,1300,1300,1295,1295,1294,1294,1291,1291,1290,1290,1289,1289,1288,1288,1287,1287,1288,1288,1289,1289,1290,1290,1291,1291,1292,1292,1294,1294,1301,	3,3,4,4,5,5,7,7,9,9,14,14,16,16,17,17,18,18,19,19,20,20,19,19,18,18,17,17,16,16,15,15,12,12,11,11,8,8,6,6,5,5,4,4,3,3,2,2,	/Volumes/Promise RAID 2/Alf/for_Thea/experiments/quantification_test 5_3D9/str_data/NS/360/3D9_PMA_360NSimage_hoescht059.TIF 3D9_PMA_360NSimage_568058.tif	1750	13,078	0	preAnalysis	none	none	360 NS	qt_5_3D9_man03	/Volumes/Promise RAID/Alf/for_Thea/experiments/quantification_test 5_3D9/3D9_5
126	215	16,651	360	NS	1049,1051,1051,1052,1052,1053,1053,1054,1054,1055,1055,1054,1054,1053,1053,1052,1052,1050,1050,1042,1042,1041,1041,1040,1040,1039,1039,1038,1038,1039,1039,1040,1040,1041,1041,1042,1042,1045,1045,1049,	44,44,45,45,46,46,47,47,49,49,54,54,56,56,57,57,58,58,59,59,58,58,57,57,56,56,55,55,49,49,47,47,46,46,45,45,44,44,43,43,	/Volumes/Promise RAID 2/Alf/for_Thea/experiments/quantification_test 5_3D9/str_data/NS/360/3D9_PMA_360NSimage_hoescht059.TIF 3D9_PMA_360NSimage_568058.tif	1750	16,651	0	preAnalysis	none	none	360 NS	qt_5_3D9_man03	/Volumes/Promise RAID/Alf/for_Thea/experiments/quantification_test 5_3D9/3D9_5
127	142	13,521	360	NS	80,81,81,82,82,83,83,82,82,81,81,79,79,76,76,73,73,71,71,70,70,69,69,70,70,71,71,72,72,80,	47,47,49,49,51,51,54,54,56,56,57,57,58,58,59,59,58,58,56,56,54,54,49,49,48,48,47,47,46,46,	/Volumes/Promise RAID 2/Alf/for_Thea/experiments/quantification_test 5_3D9/str_data/NS/360/3D9_PMA_360NSimage_hoescht059.TIF 3D9_PMA_360NSimage_568058.tif	1750	13,521	0	preAnalysis	none	none	360 NS	qt_5_3D9_man03	/Volumes/Promise RAID/Alf/for_Thea/experiments/quantification_test 5_3D9/3D9_5
128	248	13,927	360	NS	784,786,786,787,787,788,788,789,789,788,788,787,787,785,785,782,782,779,779,776,776,774,774,773,773,772,772,771,771,772,772,773,773,774,774,775,775,784,	47,47,49,49,50,50,51,51,59,59,60,60,61,61,62,62,63,63,62,62,61,61,60,60,59,59,57,57,50,50,49,49,48,48,47,47,46,46,	/Volumes/Promise RAID 2/Alf/for_Thea/experiments/quantification_test 5_3D9/str_data/NS/360/3D9_PMA_360NSimage_hoescht059.TIF 3D9_PMA_360NSimage_568058.tif	1750	13,927	0	preAnalysis	none	none	360 NS	qt_5_3D9_man03	/Volumes/Promise RAID/Alf/for_Thea/experiments/quantification_test 5_3D9/3D9_5
129	217	12,608	360	NS	1202,1204,1204,1205,1205,1206,1206,1207,1207,1208,1208,1207,1207,1205,1205,1203,1203,1198,1198,1196,1196,1194,1194,1193,1193,1192,1192,1191,1191,1192,1192,1193,1193,1195,1195,1202,	51,51,52,52,53,53,55,55,57,57,63,63,64,64,65,65,66,66,65,65,64,64,63,63,62,62,60,60,54,54,52,52,51,51,50,50,	/Volumes/Promise RAID 2/Alf/for_Thea/experiments/quantification_test 5_3D9/str_data/NS/360/3D9_PMA_360NSimage_hoescht059.TIF 3D9_PMA_360NSimage_568058.tif	1750	12,608	0	preAnalysis	none	none	360 NS	qt_5_3D9_man03	/Volumes/Promise RAID/Alf/for_Thea/experiments/quantification_test 5_3D9/3D9_5
130	242	13,971	360	NS	1058,1060,1060,1061,1061,1063,1063,1064,1064,1065,1065,1064,1064,1065,1065,1064,1064,1063,1063,1062,1062,1060,1060,1058,1058,1054,1054,1052,1052,1051,1051,1050,1050,1049,1049,1048,1048,1047,1047,1048,1048,1049,1049,1050,1050,1051,1051,1058,	79,79,80,80,81,81,83,83,86,86,87,87,88,88,90,90,93,93,94,94,95,95,96,96,95,95,94,94,93,93,92,92,91,91,90,90,88,88,83,83,81,81,80,80,79,79,78,78,	/Volumes/Promise RAID 2/Alf/for_Thea/experiments/quantification_test 5_3D9/str_data/NS/360/3D9_PMA_360NSimage_hoescht059.TIF 3D9_PMA_360NSimage_568058.tif	1750	13,971	0	preAnalysis	none	none	360 NS	qt_5_3D9_man03	/Volumes/Promise RAID/Alf/for_Thea/experiments/quantification_test 5_3D9/3D9_5
131	242	14,764	360	NS	396,400,400,401,401,402,402,403,403,402,402,401,401,400,400,399,399,396,396,392,392,389,389,387,387,386,386,385,385,384,384,383,383,384,384,385,385,386,386,387,387,390,390,396,	99,99,100,100,101,101,103,103,108,108,109,109,111,111,112,112,113,113,114,114,113,113,112,112,111,111,110,110,109,109,107,107,105,105,102,102,101,101,100,100,99,99,98,98,	/Volumes/Promise RAID 2/Alf/for_Thea/experiments/quantification_test 5_3D9/str_data/NS/360/3D9_PMA_360NSimage_hoescht059.TIF 3D9_PMA_360NSimage_568058.tif	1750	14,764	0	preAnalysis	none	none	360 NS	qt_5_3D9_man03	/Volumes/Promise RAID/Alf/for_Thea/experiments/quantification_test 5_3D9/3D9_5
132	181	14,851	360	NS	105,107,107,108,108,107,107,106,106,105,105,104,104,103,103,101,101,96,96,94,94,93,93,92,92,91,91,92,92,93,93,94,94,95,95,98,98,105,	109,109,110,110,115,115,116,116,117,117,119,119,120,120,121,121,122,122,121,121,120,120,119,119,118,118,113,113,112,112,111,111,110,110,109,109,108,108,	/Volumes/Promise RAID 2/Alf/for_Thea/experiments/quantification_test 5_3D9/str_data/NS/360/3D9_PMA_360NSimage_hoescht059.TIF 3D9_PMA_360NSimage_568058.tif	1750	14,851	0	preAnalysis	none	none	360 NS	qt_5_3D9_man03	/Volumes/Promise RAID/Alf/for_Thea/experiments/quantification_test 5_3D9/3D9_5
133	421	15,036	360	NS	1068,1071,1071,1073,1073,1074,1074,1073,1073,1072,1072,1071,1071,1070,1070,1062,1062,1060,1060,1058,1058,1055,1055,1051,1051,1049,1049,1048,1048,1047,1047,1046,1046,1045,1045,1046,1046,1047,1047,1048,1048,1050,1050,1056,1056,1057,1057,1058,1058,1061,1061,1065,1065,1068,	110,110,111,111,112,112,120,120,122,122,123,123,124,124,125,125,126,126,127,127,128,128,127,127,126,126,125,125,124,124,123,123,120,120,116,116,114,114,113,113,111,111,110,110,111,111,110,110,111,111,110,110,109,109,	/Volumes/Promise RAID 2/Alf/for_Thea/experiments/quantification_test 5_3D9/str_data/NS/360/3D9_PMA_360NSimage_hoescht059.TIF 3D9_PMA_360NSimage_568058.tif	1750	15,036	0	preAnalysis	none	none	360 NS	qt_5_3D9_man03	/Volumes/Promise RAID/Alf/for_Thea/experiments/quantification_test 5_3D9/3D9_5
134	883	21,225	360	NS	579,580,580,581,581,582,582,583,583,582,582,581,581,580,580,579,579,578,578,579,579,580,580,579,579,577,577,575,575,573,573,572,572,562,562,560,560,559,559,558,558,557,557,556,556,555,555,554,554,553,553,552,552,551,551,550,550,549,549,550,550,551,551,552,552,553,553,555,555,558,558,560,560,562,562,564,564,567,567,569,569,570,570,578,578,579,	120,120,121,121,122,122,123,123,130,130,131,131,133,133,137,137,139,139,140,140,141,141,144,144,151,151,152,152,153,153,154,154,155,155,154,154,153,153,152,152,151,151,149,149,147,147,145,145,144,144,143,143,142,142,141,141,139,139,132,132,130,130,129,129,128,128,127,127,126,126,125,125,123,123,122,122,121,121,120,120,121,121,120,120,119,119,	/Volumes/Promise RAID 2/Alf/for_Thea/experiments/quantification_test 5_3D9/str_data/NS/360/3D9_PMA_360NSimage_hoescht059.TIF 3D9_PMA_360NSimage_568058.tif	1750	21,225	0	preAnalysis	none	none	360 NS	qt_5_3D9_man03	/Volumes/Promise RAID/Alf/for_Thea/experiments/quantification_test 5_3D9/3D9_5
135	215	17,405	360	NS	744,746,746,747,747,748,748,749,749,748,748,747,747,746,746,745,745,737,737,735,735,734,734,733,733,732,732,733,733,734,734,735,735,736,736,737,737,738,738,741,741,744,	133,133,134,134,135,135,137,137,142,142,145,145,147,147,148,148,149,149,148,148,147,147,146,146,144,144,143,143,139,139,138,138,136,136,135,135,134,134,133,133,132,132,	/Volumes/Promise RAID 2/Alf/for_Thea/experiments/quantification_test 5_3D9/str_data/NS/360/3D9_PMA_360NSimage_hoescht059.TIF 3D9_PMA_360NSimage_568058.tif	1750	17,405	0	preAnalysis	none	none	360 NS	qt_5_3D9_man03	/Volumes/Promise RAID/Alf/for_Thea/experiments/quantification_test 5_3D9/3D9_5
136	170	4,329	360	NS	38,39,39,40,40,39,39,38,38,37,37,36,36,35,35,34,34,31,31,29,29,28,28,27,27,28,28,29,29,30,30,31,31,33,33,38,	141,141,143,143,151,151,152,152,153,153,154,154,155,155,156,156,157,157,156,156,155,155,154,154,147,147,145,145,143,143,142,142,141,141,140,140,	/Volumes/Promise RAID 2/Alf/for_Thea/experiments/quantification_test 5_3D9/str_data/NS/360/3D9_PMA_360NSimage_hoescht059.TIF 3D9_PMA_360NSimage_568058.tif	1750	4,329	0	preAnalysis	none	none	360 NS	qt_5_3D9_man03	/Volumes/Promise RAID/Alf/for_Thea/experiments/quantification_test 5_3D9/3D9_5
137	248	15,613	360	NS	1079,1080,1080,1082,1082,1083,1083,1084,1084,1085,1085,1084,1084,1083,1083,1082,1082,1081,1081,1079,1079,1075,1075,1072,1072,1071,1071,1070,1070,1069,1069,1068,1068,1067,1067,1068,1068,1069,1069,1071,1071,1073,1073,1079,	149,149,150,150,151,151,153,153,155,155,160,160,162,162,163,163,164,164,165,165,166,166,165,165,164,164,163,163,162,162,161,161,159,159,153,153,152,152,150,150,149,149,148,148,	/Volumes/Promise RAID 2/Alf/for_Thea/experiments/quantification_test 5_3D9/str_data/NS/360/3D9_PMA_360NSimage_hoescht059.TIF 3D9_PMA_360NSimage_568058.tif	1750	15,613	0	preAnalysis	none	none	360 NS	qt_5_3D9_man03	/Volumes/Promise RAID/Alf/for_Thea/experiments/quantification_test 5_3D9/3D9_5
138	243	20,025	360	NS	868,870,870,871,871,872,872,873,873,872,872,871,871,870,870,868,868,866,866,865,865,860,860,859,859,858,858,857,857,856,856,855,855,854,854,855,855,856,856,857,857,859,859,868,	152,152,153,153,154,154,155,155,161,161,163,163,165,165,166,166,167,167,168,168,167,167,166,166,165,165,164,164,163,163,162,162,159,159,158,158,154,154,153,153,152,152,151,151,	/Volumes/Promise RAID 2/Alf/for_Thea/experiments/quantification_test 5_3D9/str_data/NS/360/3D9_PMA_360NSimage_hoescht059.TIF 3D9_PMA_360NSimage_568058.tif	1750	20,025	0	preAnalysis	none	none	360 NS	qt_5_3D9_man03	/Volumes/Promise RAID/Alf/for_Thea/experiments/quantification_test 5_3D9/3D9_5
139	168	15,488	360	NS	137,139,139,140,140,141,141,140,140,139,139,138,138,137,137,135,135,132,132,130,130,129,129,128,128,127,127,126,126,127,127,128,128,129,129,131,131,137,	155,155,156,156,159,159,162,162,164,164,166,166,167,167,168,168,169,169,168,168,167,167,166,166,165,165,162,162,158,158,157,157,156,156,155,155,154,154,	/Volumes/Promise RAID 2/Alf/for_Thea/experiments/quantification_test 5_3D9/str_data/NS/360/3D9_PMA_360NSimage_hoescht059.TIF 3D9_PMA_360NSimage_568058.tif	1750	15,488	0	preAnalysis	none	none	360 NS	qt_5_3D9_man03	/Volumes/Promise RAID/Alf/for_Thea/experiments/quantification_test 5_3D9/3D9_5
140	217	100,871	360	NS	309,311,311,312,312,314,314,315,315,316,316,315,315,314,314,313,313,312,312,309,309,306,306,304,304,301,301,300,300,299,299,298,298,299,299,300,300,301,301,302,302,304,304,307,307,309,	193,193,194,194,195,195,196,196,198,198,202,202,204,204,205,205,206,206,207,207,208,208,209,209,208,208,206,206,205,205,204,204,199,199,197,197,196,196,195,195,194,194,193,193,192,192,	/Volumes/Promise RAID 2/Alf/for_Thea/experiments/quantification_test 5_3D9/str_data/NS/360/3D9_PMA_360NSimage_hoescht059.TIF 3D9_PMA_360NSimage_568058.tif	1750	100,871	0	preAnalysis	none	none	360 NS	qt_5_3D9_man03	/Volumes/Promise RAID/Alf/for_Thea/experiments/quantification_test 5_3D9/3D9_5
141	239	14,063	360	NS	1018,1021,1021,1022,1022,1023,1023,1024,1024,1025,1025,1026,1026,1025,1025,1024,1024,1023,1023,1022,1022,1021,1021,1019,1019,1016,1016,1014,1014,1012,1012,1011,1011,1010,1010,1009,1009,1008,1008,1009,1009,1010,1010,1011,1011,1013,1013,1015,1015,1018,	210,210,211,211,212,212,213,213,214,214,217,217,218,218,222,222,224,224,225,225,226,226,227,227,228,228,227,227,226,226,225,225,224,224,222,222,219,219,217,217,214,214,213,213,211,211,210,210,209,209,	/Volumes/Promise RAID 2/Alf/for_Thea/experiments/quantification_test 5_3D9/str_data/NS/360/3D9_PMA_360NSimage_hoescht059.TIF 3D9_PMA_360NSimage_568058.tif	1750	14,063	0	preAnalysis	none	none	360 NS	qt_5_3D9_man03	/Volumes/Promise RAID/Alf/for_Thea/experiments/quantification_test 5_3D9/3D9_5
142	221	13,851	360	NS	383,384,384,385,385,386,386,387,387,386,386,385,385,384,384,382,382,376,376,374,374,372,372,371,371,372,372,373,373,374,374,375,375,376,376,383,	230,230,231,231,232,232,235,235,240,240,243,243,244,244,245,245,246,246,245,245,244,244,242,242,235,235,233,233,232,232,231,231,230,230,229,229,	/Volumes/Promise RAID 2/Alf/for_Thea/experiments/quantification_test 5_3D9/str_data/NS/360/3D9_PMA_360NSimage_hoescht059.TIF 3D9_PMA_360NSimage_568058.tif	1750	13,851	0	preAnalysis	none	none	360 NS	qt_5_3D9_man03	/Volumes/Promise RAID/Alf/for_Thea/experiments/quantification_test 5_3D9/3D9_5
143	326	16,736	360	NS	617,620,620,622,622,623,623,624,624,625,625,629,629,633,633,634,634,638,638,640,640,639,639,637,637,634,634,631,631,629,629,627,627,626,626,625,625,624,624,622,622,617,617,613,613,610,610,609,609,608,608,609,609,610,610,611,611,612,612,613,613,617,	250,250,251,251,252,252,257,257,258,258,257,257,258,258,257,257,256,256,257,257,263,263,264,264,265,265,264,264,263,263,261,261,262,262,263,263,266,266,267,267,266,266,265,265,264,264,263,263,261,261,255,255,253,253,252,252,251,251,250,250,249,249,	/Volumes/Promise RAID 2/Alf/for_Thea/experiments/quantification_test 5_3D9/str_data/NS/360/3D9_PMA_360NSimage_hoescht059.TIF 3D9_PMA_360NSimage_568058.tif	1750	16,736	0	preAnalysis	none	none	360 NS	qt_5_3D9_man03	/Volumes/Promise RAID/Alf/for_Thea/experiments/quantification_test 5_3D9/3D9_5
144	266	16,466	360	NS	919,922,922,924,924,925,925,926,926,927,927,928,928,927,927,926,926,925,925,923,923,920,920,919,919,916,916,914,914,913,913,912,912,911,911,910,910,911,911,912,912,913,913,914,914,919,	253,253,254,254,255,255,256,256,258,258,259,259,265,265,268,268,269,269,270,270,271,271,272,272,271,271,270,270,269,269,267,267,265,265,261,261,259,259,255,255,254,254,253,253,252,252,	/Volumes/Promise RAID 2/Alf/for_Thea/experiments/quantification_test 5_3D9/str_data/NS/360/3D9_PMA_360NSimage_hoescht059.TIF 3D9_PMA_360NSimage_568058.tif	1750	16,466	0	preAnalysis	none	none	360 NS	qt_5_3D9_man03	/Volumes/Promise RAID/Alf/for_Thea/experiments/quantification_test 5_3D9/3D9_5
145	234	21,547	360	NS	1066,1068,1068,1069,1069,1070,1070,1071,1071,1070,1070,1069,1069,1068,1068,1066,1066,1064,1064,1060,1060,1059,1059,1057,1057,1056,1056,1055,1055,1054,1054,1053,1053,1054,1054,1055,1055,1056,1056,1057,1057,1060,1060,1066,	256,256,257,257,258,258,259,259,266,266,267,267,269,269,270,270,271,271,272,272,271,271,270,270,269,269,268,268,267,267,266,266,261,261,259,259,258,258,257,257,256,256,255,255,	/Volumes/Promise RAID 2/Alf/for_Thea/experiments/quantification_test 5_3D9/str_data/NS/360/3D9_PMA_360NSimage_hoescht059.TIF 3D9_PMA_360NSimage_568058.tif	1750	21,547	0	preAnalysis	none	none	360 NS	qt_5_3D9_man03	/Volumes/Promise RAID/Alf/for_Thea/experiments/quantification_test 5_3D9/3D9_5
146	199	15,573	360	NS	683,685,685,686,686,687,687,686,686,687,687,686,686,685,685,684,684,680,680,679,679,674,674,673,673,672,672,671,671,672,672,673,673,675,675,677,677,683,	263,263,265,265,267,267,268,268,270,270,271,271,274,274,276,276,277,277,278,278,277,277,276,276,275,275,274,274,267,267,265,265,264,264,263,263,262,262,	/Volumes/Promise RAID 2/Alf/for_Thea/experiments/quantification_test 5_3D9/str_data/NS/360/3D9_PMA_360NSimage_hoescht059.TIF 3D9_PMA_360NSimage_568058.tif	1750	15,573	0	preAnalysis	none	none	360 NS	qt_5_3D9_man03	/Volumes/Promise RAID/Alf/for_Thea/experiments/quantification_test 5_3D9/3D9_5
147	200	16,68	360	NS	230,231,231,232,232,233,233,232,232,231,231,230,230,228,228,225,225,222,222,220,220,219,219,218,218,217,217,218,218,219,219,220,220,221,221,223,223,230,	289,289,290,290,291,291,298,298,301,301,302,302,303,303,304,304,303,303,302,302,301,301,300,300,299,299,294,294,293,293,291,291,290,290,289,289,288,288,	/Volumes/Promise RAID 2/Alf/for_Thea/experiments/quantification_test 5_3D9/str_data/NS/360/3D9_PMA_360NSimage_hoescht059.TIF 3D9_PMA_360NSimage_568058.tif	1750	16,68	0	preAnalysis	none	none	360 NS	qt_5_3D9_man03	/Volumes/Promise RAID/Alf/for_Thea/experiments/quantification_test 5_3D9/3D9_5
148	247	17,567	360	NS	1312,1315,1315,1317,1317,1319,1319,1320,1320,1321,1321,1320,1320,1319,1319,1318,1318,1317,1317,1316,1316,1313,1313,1312,1312,1308,1308,1307,1307,1306,1306,1305,1305,1304,1304,1303,1303,1304,1304,1305,1305,1307,1307,1309,1309,1312,	300,300,301,301,302,302,303,303,308,308,311,311,313,313,314,314,315,315,316,316,317,317,318,318,317,317,316,316,315,315,312,312,310,310,309,309,303,303,302,302,301,301,300,300,299,299,	/Volumes/Promise RAID 2/Alf/for_Thea/experiments/quantification_test 5_3D9/str_data/NS/360/3D9_PMA_360NSimage_hoescht059.TIF 3D9_PMA_360NSimage_568058.tif	1750	17,567	0	preAnalysis	none	none	360 NS	qt_5_3D9_man03	/Volumes/Promise RAID/Alf/for_Thea/experiments/quantification_test 5_3D9/3D9_5
149	212	19,033	360	NS	1072,1073,1073,1074,1074,1075,1075,1076,1076,1075,1075,1074,1074,1073,1073,1072,1072,1070,1070,1067,1067,1065,1065,1063,1063,1062,1062,1061,1061,1060,1060,1061,1061,1062,1062,1063,1063,1065,1065,1072,	334,334,335,335,336,336,339,339,344,344,346,346,347,347,348,348,349,349,350,350,349,349,348,348,347,347,346,346,345,345,339,339,336,336,335,335,334,334,333,333,	/Volumes/Promise RAID 2/Alf/for_Thea/experiments/quantification_test 5_3D9/str_data/NS/360/3D9_PMA_360NSimage_hoescht059.TIF 3D9_PMA_360NSimage_568058.tif	1750	19,033	0	preAnalysis	none	none	360 NS	qt_5_3D9_man03	/Volumes/Promise RAID/Alf/for_Thea/experiments/quantification_test 5_3D9/3D9_5
150	218	17,239	360	NS	1328,1330,1330,1331,1331,1332,1332,1333,1333,1334,1334,1333,1333,1332,1332,1331,1331,1330,1330,1328,1328,1321,1321,1319,1319,1317,1317,1316,1316,1317,1317,1318,1318,1319,1319,1320,1320,1321,1321,1323,1323,1328,	345,345,346,346,347,347,348,348,353,353,354,354,356,356,357,357,358,358,359,359,360,360,359,359,358,358,356,356,351,351,349,349,348,348,347,347,346,346,345,345,344,344,	/Volumes/Promise RAID 2/Alf/for_Thea/experiments/quantification_test 5_3D9/str_data/NS/360/3D9_PMA_360NSimage_hoescht059.TIF 3D9_PMA_360NSimage_568058.tif	1750	17,239	0	preAnalysis	none	none	360 NS	qt_5_3D9_man03	/Volumes/Promise RAID/Alf/for_Thea/experiments/quantification_test 5_3D9/3D9_5
151	242	16,521	360	NS	948,950,950,952,952,953,953,954,954,955,955,956,956,955,955,953,953,949,949,948,948,944,944,942,942,940,940,939,939,938,938,937,937,938,938,939,939,941,941,943,943,948,	370,370,371,371,372,372,373,373,374,374,376,376,383,383,384,384,385,385,386,386,385,385,384,384,383,383,382,382,380,380,378,378,373,373,372,372,371,371,370,370,369,369,	/Volumes/Promise RAID 2/Alf/for_Thea/experiments/quantification_test 5_3D9/str_data/NS/360/3D9_PMA_360NSimage_hoescht059.TIF 3D9_PMA_360NSimage_568058.tif	1750	16,521	0	preAnalysis	none	none	360 NS	qt_5_3D9_man03	/Volumes/Promise RAID/Alf/for_Thea/experiments/quantification_test 5_3D9/3D9_5
152	211	20,246	360	NS	789,791,791,792,792,793,793,792,792,791,791,790,790,789,789,788,788,784,784,783,783,782,782,780,780,779,779,778,778,777,777,778,778,779,779,780,780,782,782,789,	400,400,401,401,403,403,411,411,412,412,413,413,414,414,415,415,416,416,415,415,414,414,413,413,412,412,410,410,409,409,404,404,402,402,401,401,400,400,399,399,	/Volumes/Promise RAID 2/Alf/for_Thea/experiments/quantification_test 5_3D9/str_data/NS/360/3D9_PMA_360NSimage_hoescht059.TIF 3D9_PMA_360NSimage_568058.tif	1750	20,246	0	preAnalysis	none	none	360 NS	qt_5_3D9_man03	/Volumes/Promise RAID/Alf/for_Thea/experiments/quantification_test 5_3D9/3D9_5
153	203	20,128	360	NS	694,697,697,698,698,699,699,700,700,699,699,698,698,697,697,695,695,691,691,688,688,687,687,686,686,685,685,686,686,687,687,689,689,692,692,694,	412,412,413,413,414,414,416,416,424,424,425,425,426,426,427,427,428,428,427,427,426,426,425,425,423,423,416,416,414,414,413,413,412,412,411,411,	/Volumes/Promise RAID 2/Alf/for_Thea/experiments/quantification_test 5_3D9/str_data/NS/360/3D9_PMA_360NSimage_hoescht059.TIF 3D9_PMA_360NSimage_568058.tif	1750	20,128	0	preAnalysis	none	none	360 NS	qt_5_3D9_man03	/Volumes/Promise RAID/Alf/for_Thea/experiments/quantification_test 5_3D9/3D9_5
154	213	20,93	360	NS	836,838,838,839,839,840,840,841,841,842,842,841,841,840,840,839,839,838,838,831,831,829,829,828,828,827,827,826,826,827,827,828,828,829,829,831,831,834,834,836,	460,460,461,461,462,462,463,463,464,464,472,472,473,473,474,474,475,475,476,476,475,475,474,474,472,472,471,471,465,465,463,463,462,462,461,461,460,460,459,459,	/Volumes/Promise RAID 2/Alf/for_Thea/experiments/quantification_test 5_3D9/str_data/NS/360/3D9_PMA_360NSimage_hoescht059.TIF 3D9_PMA_360NSimage_568058.tif	1750	20,93	0	preAnalysis	none	none	360 NS	qt_5_3D9_man03	/Volumes/Promise RAID/Alf/for_Thea/experiments/quantification_test 5_3D9/3D9_5
155	202	19,46	360	NS	532,534,534,535,535,536,536,537,537,536,536,534,534,532,532,526,526,524,524,523,523,522,522,521,521,522,522,523,523,524,524,526,526,528,528,532,	490,490,491,491,492,492,493,493,500,500,502,502,504,504,505,505,504,504,503,503,502,502,500,500,494,494,493,493,492,492,491,491,490,490,489,489,	/Volumes/Promise RAID 2/Alf/for_Thea/experiments/quantification_test 5_3D9/str_data/NS/360/3D9_PMA_360NSimage_hoescht059.TIF 3D9_PMA_360NSimage_568058.tif	1750	19,46	0	preAnalysis	none	none	360 NS	qt_5_3D9_man03	/Volumes/Promise RAID/Alf/for_Thea/experiments/quantification_test 5_3D9/3D9_5
156	193	14,793	360	NS	151,153,153,154,154,155,155,156,156,157,157,156,156,155,155,154,154,149,149,147,147,145,145,144,144,143,143,142,142,143,143,144,144,145,145,146,146,147,147,151,	503,503,504,504,505,505,506,506,508,508,515,515,517,517,518,518,519,519,518,518,517,517,516,516,514,514,512,512,509,509,506,506,505,505,504,504,503,503,502,502,	/Volumes/Promise RAID 2/Alf/for_Thea/experiments/quantification_test 5_3D9/str_data/NS/360/3D9_PMA_360NSimage_hoescht059.TIF 3D9_PMA_360NSimage_568058.tif	1750	14,793	0	preAnalysis	none	none	360 NS	qt_5_3D9_man03	/Volumes/Promise RAID/Alf/for_Thea/experiments/quantification_test 5_3D9/3D9_5
157	182	16,791	360	NS	231,234,234,235,235,236,236,237,237,236,236,235,235,234,234,233,233,231,231,230,230,228,228,225,225,223,223,222,222,223,223,224,224,228,228,231,	544,544,545,545,546,546,547,547,552,552,553,553,554,554,555,555,556,556,557,557,558,558,559,559,558,558,557,557,547,547,545,545,544,544,543,543,	/Volumes/Promise RAID 2/Alf/for_Thea/experiments/quantification_test 5_3D9/str_data/NS/360/3D9_PMA_360NSimage_hoescht059.TIF 3D9_PMA_360NSimage_568058.tif	1750	16,791	0	preAnalysis	none	none	360 NS	qt_5_3D9_man03	/Volumes/Promise RAID/Alf/for_Thea/experiments/quantification_test 5_3D9/3D9_5
158	252	18,484	360	NS	674,679,679,680,680,681,681,682,682,681,681,680,680,679,679,678,678,677,677,675,675,674,674,671,671,669,669,668,668,667,667,666,666,667,667,669,669,670,670,671,671,673,673,674,	599,599,600,600,601,601,603,603,610,610,612,612,614,614,615,615,616,616,617,617,618,618,619,619,618,618,617,617,616,616,614,614,607,607,602,602,601,601,600,600,599,599,598,598,	/Volumes/Promise RAID 2/Alf/for_Thea/experiments/quantification_test 5_3D9/str_data/NS/360/3D9_PMA_360NSimage_hoescht059.TIF 3D9_PMA_360NSimage_568058.tif	1750	18,484	0	preAnalysis	none	none	360 NS	qt_5_3D9_man03	/Volumes/Promise RAID/Alf/for_Thea/experiments/quantification_test 5_3D9/3D9_5
159	282	17,911	360	NS	909,912,912,913,913,914,914,915,915,918,918,920,920,921,921,922,922,923,923,924,924,923,923,922,922,920,920,918,918,914,914,909,909,908,908,907,907,905,905,904,904,903,903,904,904,906,906,907,907,908,908,909,	652,652,651,651,652,652,651,651,652,652,653,653,655,655,656,656,657,657,660,660,663,663,665,665,667,667,668,668,669,669,668,668,667,667,666,666,665,665,663,663,661,661,655,655,654,654,653,653,652,652,651,651,	/Volumes/Promise RAID 2/Alf/for_Thea/experiments/quantification_test 5_3D9/str_data/NS/360/3D9_PMA_360NSimage_hoescht059.TIF 3D9_PMA_360NSimage_568058.tif	1750	17,911	0	preAnalysis	none	none	360 NS	qt_5_3D9_man03	/Volumes/Promise RAID/Alf/for_Thea/experiments/quantification_test 5_3D9/3D9_5
160	216	19	360	NS	808,809,809,810,810,811,811,810,810,809,809,808,808,807,807,805,805,802,802,801,801,799,799,798,798,796,796,795,795,796,796,797,797,798,798,799,799,800,800,802,802,808,	670,670,671,671,672,672,679,679,682,682,683,683,685,685,686,686,687,687,686,686,685,685,684,684,683,683,681,681,676,676,674,674,673,673,672,672,671,671,670,670,669,669,	/Volumes/Promise RAID 2/Alf/for_Thea/experiments/quantification_test 5_3D9/str_data/NS/360/3D9_PMA_360NSimage_hoescht059.TIF 3D9_PMA_360NSimage_568058.tif	1750	19	0	preAnalysis	none	none	360 NS	qt_5_3D9_man03	/Volumes/Promise RAID/Alf/for_Thea/experiments/quantification_test 5_3D9/3D9_5
161	1114	47,753	360	NS	902,903,903,904,904,905,905,906,906,907,907,908,908,909,909,911,911,913,913,914,914,912,912,911,911,909,909,904,904,903,903,902,902,901,901,900,900,899,899,898,898,897,897,896,896,895,895,894,894,893,893,892,892,891,891,890,890,889,889,888,888,889,889,890,890,891,891,892,892,893,893,894,894,895,895,896,896,897,897,898,898,899,899,900,900,901,901,902,902,903,903,904,904,907,907,909,909,910,910,911…	687,687,688,688,689,689,690,690,691,691,693,693,696,696,697,697,698,698,699,699,701,701,702,702,703,703,702,702,703,703,704,704,705,705,706,706,707,707,708,708,709,709,711,711,713,713,715,715,717,717,719,719,722,722,726,726,730,730,736,736,753,753,759,759,763,763,767,767,770,770,772,772,775,775,777,777,779,779,782,782,784,784,786,786,788,788,791,791,793,793,795,795,796,796,797,797,798,798,799,799…	/Volumes/Promise RAID 2/Alf/for_Thea/experiments/quantification_test 5_3D9/str_data/NS/360/3D9_PMA_360NSimage_hoescht059.TIF 3D9_PMA_360NSimage_568058.tif	1750	47,753	0	preAnalysis	none	none	360 NS	qt_5_3D9_man03	/Volumes/Promise RAID/Alf/for_Thea/experiments/quantification_test 5_3D9/3D9_5
162	235	19,562	360	NS	1217,1220,1220,1221,1221,1222,1222,1223,1223,1224,1224,1223,1223,1222,1222,1221,1221,1220,1220,1213,1213,1210,1210,1209,1209,1208,1208,1207,1207,1208,1208,1209,1209,1210,1210,1212,1212,1217,	689,689,690,690,691,691,692,692,693,693,700,700,702,702,703,703,704,704,705,705,704,704,703,703,702,702,700,700,694,694,691,691,690,690,689,689,688,688,	/Volumes/Promise RAID 2/Alf/for_Thea/experiments/quantification_test 5_3D9/str_data/NS/360/3D9_PMA_360NSimage_hoescht059.TIF 3D9_PMA_360NSimage_568058.tif	1750	19,562	0	preAnalysis	none	none	360 NS	qt_5_3D9_man03	/Volumes/Promise RAID/Alf/for_Thea/experiments/quantification_test 5_3D9/3D9_5
163	330	16,33	360	NS	291,294,294,295,295,296,296,297,297,296,296,295,295,294,294,292,292,291,291,289,289,288,288,287,287,285,285,284,284,277,277,275,275,274,274,273,273,274,274,276,276,277,277,279,279,280,280,281,281,282,282,283,283,284,284,285,285,288,288,291,	718,718,719,719,720,720,722,722,727,727,728,728,729,729,730,730,731,731,732,732,735,735,737,737,739,739,740,740,741,741,740,740,738,738,736,736,733,733,731,731,730,730,729,729,728,728,727,727,722,722,721,721,720,720,719,719,718,718,717,717,	/Volumes/Promise RAID 2/Alf/for_Thea/experiments/quantification_test 5_3D9/str_data/NS/360/3D9_PMA_360NSimage_hoescht059.TIF 3D9_PMA_360NSimage_568058.tif	1750	16,33	0	preAnalysis	none	none	360 NS	qt_5_3D9_man03	/Volumes/Promise RAID/Alf/for_Thea/experiments/quantification_test 5_3D9/3D9_5
164	230	19,226	360	NS	993,996,996,997,997,998,998,999,999,1000,1000,1001,1001,1000,1000,999,999,996,996,995,995,993,993,991,991,989,989,988,988,987,987,986,986,985,985,984,984,985,985,986,986,988,988,993,	726,726,727,727,728,728,729,729,731,731,733,733,740,740,742,742,743,743,744,744,743,743,742,742,741,741,739,739,738,738,737,737,735,735,733,733,729,729,727,727,726,726,725,725,	/Volumes/Promise RAID 2/Alf/for_Thea/experiments/quantification_test 5_3D9/str_data/NS/360/3D9_PMA_360NSimage_hoescht059.TIF 3D9_PMA_360NSimage_568058.tif	1750	19,226	0	preAnalysis	none	none	360 NS	qt_5_3D9_man03	/Volumes/Promise RAID/Alf/for_Thea/experiments/quantification_test 5_3D9/3D9_5
165	271	17,332	360	NS	1111,1112,1112,1114,1114,1115,1115,1114,1114,1113,1113,1112,1112,1111,1111,1109,1109,1100,1100,1097,1097,1095,1095,1094,1094,1093,1093,1094,1094,1093,1093,1094,1094,1095,1095,1096,1096,1097,1097,1098,1098,1100,1100,1105,1105,1111,	752,752,753,753,755,755,758,758,762,762,764,764,765,765,766,766,767,767,766,766,765,765,764,764,762,762,761,761,760,760,759,759,757,757,756,756,755,755,754,754,753,753,752,752,751,751,	/Volumes/Promise RAID 2/Alf/for_Thea/experiments/quantification_test 5_3D9/str_data/NS/360/3D9_PMA_360NSimage_hoescht059.TIF 3D9_PMA_360NSimage_568058.tif	1750	17,332	0	preAnalysis	none	none	360 NS	qt_5_3D9_man03	/Volumes/Promise RAID/Alf/for_Thea/experiments/quantification_test 5_3D9/3D9_5
166	152	16,664	360	NS	111,113,113,114,114,115,115,116,116,115,115,114,114,112,112,111,111,109,109,108,108,106,106,104,104,103,103,104,104,105,105,107,107,111,	756,756,757,757,759,759,761,761,766,766,768,768,769,769,770,770,769,769,770,770,769,769,768,768,766,766,759,759,758,758,756,756,755,755,	/Volumes/Promise RAID 2/Alf/for_Thea/experiments/quantification_test 5_3D9/str_data/NS/360/3D9_PMA_360NSimage_hoescht059.TIF 3D9_PMA_360NSimage_568058.tif	1750	16,664	0	preAnalysis	none	none	360 NS	qt_5_3D9_man03	/Volumes/Promise RAID/Alf/for_Thea/experiments/quantification_test 5_3D9/3D9_5
167	171	17,48	360	NS	482,483,483,484,484,485,485,486,486,485,485,484,484,483,483,482,482,475,475,474,474,473,473,472,472,471,471,472,472,473,473,474,474,475,475,477,477,482,	827,827,828,828,829,829,834,834,835,835,838,838,839,839,840,840,841,841,840,840,839,839,838,838,836,836,832,832,830,830,829,829,828,828,827,827,826,826,	/Volumes/Promise RAID 2/Alf/for_Thea/experiments/quantification_test 5_3D9/str_data/NS/360/3D9_PMA_360NSimage_hoescht059.TIF 3D9_PMA_360NSimage_568058.tif	1750	17,48	0	preAnalysis	none	none	360 NS	qt_5_3D9_man03	/Volumes/Promise RAID/Alf/for_Thea/experiments/quantification_test 5_3D9/3D9_5
168	216	17,699	360	NS	575,578,578,579,579,580,580,581,581,582,582,583,583,582,582,581,581,580,580,579,579,578,578,576,576,572,572,570,570,569,569,568,568,567,567,566,566,567,567,568,568,569,569,570,570,573,573,575,	829,829,830,830,831,831,833,833,834,834,838,838,839,839,841,841,842,842,843,843,844,844,845,845,846,846,845,845,844,844,843,843,842,842,840,840,836,836,833,833,831,831,830,830,829,829,828,828,	/Volumes/Promise RAID 2/Alf/for_Thea/experiments/quantification_test 5_3D9/str_data/NS/360/3D9_PMA_360NSimage_hoescht059.TIF 3D9_PMA_360NSimage_568058.tif	1750	17,699	0	preAnalysis	none	none	360 NS	qt_5_3D9_man03	/Volumes/Promise RAID/Alf/for_Thea/experiments/quantification_test 5_3D9/3D9_5
169	190	17,116	360	NS	1282,1284,1284,1285,1285,1286,1286,1287,1287,1286,1286,1285,1285,1284,1284,1282,1282,1278,1278,1276,1276,1274,1274,1273,1273,1272,1272,1271,1271,1272,1272,1273,1273,1274,1274,1275,1275,1276,1276,1279,1279,1282,	833,833,834,834,835,835,836,836,844,844,845,845,846,846,847,847,848,848,847,847,846,846,845,845,844,844,842,842,840,840,837,837,836,836,835,835,834,834,833,833,832,832,	/Volumes/Promise RAID 2/Alf/for_Thea/experiments/quantification_test 5_3D9/str_data/NS/360/3D9_PMA_360NSimage_hoescht059.TIF 3D9_PMA_360NSimage_568058.tif	1750	17,116	0	preAnalysis	none	none	360 NS	qt_5_3D9_man03	/Volumes/Promise RAID/Alf/for_Thea/experiments/quantification_test 5_3D9/3D9_5
170	188	19,309	360	NS	521,523,523,524,524,525,525,524,524,523,523,522,522,521,521,519,519,514,514,513,513,511,511,510,510,511,511,512,512,513,513,514,514,521,	859,859,861,861,863,863,868,868,870,870,871,871,872,872,873,873,874,874,873,873,872,872,868,868,866,866,861,861,860,860,859,859,858,858,	/Volumes/Promise RAID 2/Alf/for_Thea/experiments/quantification_test 5_3D9/str_data/NS/360/3D9_PMA_360NSimage_hoescht059.TIF 3D9_PMA_360NSimage_568058.tif	1750	19,309	0	preAnalysis	none	none	360 NS	qt_5_3D9_man03	/Volumes/Promise RAID/Alf/for_Thea/experiments/quantification_test 5_3D9/3D9_5
171	248	14,028	360	NS	431,433,433,434,434,435,435,436,436,435,435,434,434,432,432,431,431,427,427,421,421,420,420,418,418,417,417,416,416,415,415,416,416,417,417,418,418,421,421,423,423,424,424,426,426,431,	893,893,894,894,895,895,897,897,902,902,904,904,905,905,906,906,907,907,908,908,907,907,906,906,905,905,904,904,903,903,899,899,897,897,896,896,895,895,896,896,894,894,893,893,892,892,	/Volumes/Promise RAID 2/Alf/for_Thea/experiments/quantification_test 5_3D9/str_data/NS/360/3D9_PMA_360NSimage_hoescht059.TIF 3D9_PMA_360NSimage_568058.tif	1750	14,028	0	preAnalysis	none	none	360 NS	qt_5_3D9_man03	/Volumes/Promise RAID/Alf/for_Thea/experiments/quantification_test 5_3D9/3D9_5
172	157	14,968	360	NS	108,110,110,111,111,112,112,113,113,112,112,111,111,109,109,108,108,104,104,102,102,101,101,100,100,99,99,100,100,101,101,103,103,105,105,108,	895,895,896,896,897,897,898,898,903,903,905,905,907,907,908,908,909,909,908,908,907,907,906,906,905,905,900,900,898,898,896,896,895,895,894,894,	/Volumes/Promise RAID 2/Alf/for_Thea/experiments/quantification_test 5_3D9/str_data/NS/360/3D9_PMA_360NSimage_hoescht059.TIF 3D9_PMA_360NSimage_568058.tif	1750	14,968	0	preAnalysis	none	none	360 NS	qt_5_3D9_man03	/Volumes/Promise RAID/Alf/for_Thea/experiments/quantification_test 5_3D9/3D9_5
173	249	18,92	360	NS	1338,1342,1342,1343,1343,1345,1345,1346,1346,1347,1347,1348,1348,1347,1347,1346,1346,1345,1345,1342,1342,1339,1339,1336,1336,1335,1335,1334,1334,1333,1333,1332,1332,1331,1331,1330,1330,1331,1331,1332,1332,1333,1333,1334,1334,1336,1336,1338,	902,902,903,903,904,904,905,905,907,907,910,910,915,915,917,917,918,918,919,919,920,920,919,919,918,918,917,917,916,916,915,915,914,914,912,912,907,907,906,906,904,904,903,903,902,902,901,901,	/Volumes/Promise RAID 2/Alf/for_Thea/experiments/quantification_test 5_3D9/str_data/NS/360/3D9_PMA_360NSimage_hoescht059.TIF 3D9_PMA_360NSimage_568058.tif	1750	18,92	0	preAnalysis	none	none	360 NS	qt_5_3D9_man03	/Volumes/Promise RAID/Alf/for_Thea/experiments/quantification_test 5_3D9/3D9_5
174	1214	24,456	360	NS	893,894,894,895,895,896,896,897,897,898,898,899,899,900,900,901,901,902,902,903,903,904,904,906,906,907,907,908,908,909,909,910,910,911,911,912,912,913,913,915,915,916,916,917,917,918,918,919,919,920,920,921,921,923,923,924,924,925,925,926,926,927,927,930,930,933,933,940,940,944,944,946,946,947,947,948,948,949,949,948,948,947,947,946,946,945,945,944,944,941,941,938,938,937,937,936,936,935,935,933…	917,917,921,921,924,924,926,926,929,929,931,931,932,932,934,934,935,935,937,937,938,938,940,940,941,941,942,942,943,943,944,944,945,945,946,946,947,947,948,948,949,949,950,950,951,951,952,952,953,953,954,954,955,955,956,956,957,957,958,958,959,959,960,960,961,961,962,962,963,963,964,964,965,965,966,966,968,968,973,973,975,975,976,976,977,977,978,978,979,979,980,980,985,985,988,988,990,990,992,992…	/Volumes/Promise RAID 2/Alf/for_Thea/experiments/quantification_test 5_3D9/str_data/NS/360/3D9_PMA_360NSimage_hoescht059.TIF 3D9_PMA_360NSimage_568058.tif	1750	24,456	0	preAnalysis	none	none	360 NS	qt_5_3D9_man03	/Volumes/Promise RAID/Alf/for_Thea/experiments/quantification_test 5_3D9/3D9_5
175	221	19,643	360	NS	983,985,985,986,986,987,987,986,986,985,985,984,984,982,982,980,980,979,979,976,976,975,975,972,972,971,971,970,970,969,969,970,970,971,971,973,973,983,	913,913,914,914,915,915,920,920,922,922,923,923,924,924,925,925,926,926,927,927,928,928,927,927,926,926,924,924,922,922,915,915,914,914,913,913,912,912,	/Volumes/Promise RAID 2/Alf/for_Thea/experiments/quantification_test 5_3D9/str_data/NS/360/3D9_PMA_360NSimage_hoescht059.TIF 3D9_PMA_360NSimage_568058.tif	1750	19,643	0	preAnalysis	none	none	360 NS	qt_5_3D9_man03	/Volumes/Promise RAID/Alf/for_Thea/experiments/quantification_test 5_3D9/3D9_5
176	202	19,153	360	NS	713,716,716,718,718,720,720,721,721,720,720,719,719,717,717,711,711,709,709,708,708,707,707,706,706,705,705,706,706,708,708,710,710,713,	925,925,926,926,927,927,929,929,936,936,938,938,939,939,940,940,939,939,938,938,937,937,935,935,934,934,928,928,926,926,925,925,924,924,	/Volumes/Promise RAID 2/Alf/for_Thea/experiments/quantification_test 5_3D9/str_data/NS/360/3D9_PMA_360NSimage_hoescht059.TIF 3D9_PMA_360NSimage_568058.tif	1750	19,153	0	preAnalysis	none	none	360 NS	qt_5_3D9_man03	/Volumes/Promise RAID/Alf/for_Thea/experiments/quantification_test 5_3D9/3D9_5
177	196	18,719	360	NS	699,701,701,702,702,703,703,702,702,701,701,700,700,699,699,698,698,692,692,690,690,689,689,688,688,689,689,690,690,691,691,693,693,698,698,699,	953,953,954,954,955,955,961,961,963,963,965,965,967,967,968,968,969,969,968,968,967,967,965,965,958,958,957,957,955,955,954,954,953,953,952,952,	/Volumes/Promise RAID 2/Alf/for_Thea/experiments/quantification_test 5_3D9/str_data/NS/360/3D9_PMA_360NSimage_hoescht059.TIF 3D9_PMA_360NSimage_568058.tif	1750	18,719	0	preAnalysis	none	none	360 NS	qt_5_3D9_man03	/Volumes/Promise RAID/Alf/for_Thea/experiments/quantification_test 5_3D9/3D9_5
178	263	26,049	360	NS	900,902,902,903,903,904,904,905,905,906,906,907,907,906,906,905,905,902,902,901,901,899,899,897,897,896,896,895,895,893,893,892,892,891,891,890,890,889,889,888,888,889,889,891,891,900,	980,980,981,981,982,982,983,983,984,984,985,985,995,995,996,996,997,997,998,998,997,997,996,996,995,995,994,994,993,993,992,992,991,991,990,990,989,989,987,987,981,981,980,980,979,979,	/Volumes/Promise RAID 2/Alf/for_Thea/experiments/quantification_test 5_3D9/str_data/NS/360/3D9_PMA_360NSimage_hoescht059.TIF 3D9_PMA_360NSimage_568058.tif	1750	26,049	0	preAnalysis	none	none	360 NS	qt_5_3D9_man03	/Volumes/Promise RAID/Alf/for_Thea/experiments/quantification_test 5_3D9/3D9_5
179	227	9,586	360	NS	199,202,202,204,204,206,206,207,207,208,208,207,207,206,206,205,205,204,204,203,203,202,202,200,200,198,198,195,195,193,193,192,192,191,191,190,190,189,189,190,190,191,191,192,192,193,193,194,194,199,	985,985,984,984,985,985,986,986,988,988,989,989,992,992,994,994,996,996,997,997,998,998,999,999,1000,1000,1001,1001,1000,1000,999,999,998,998,994,994,992,992,990,990,988,988,987,987,986,986,985,985,984,984,	/Volumes/Promise RAID 2/Alf/for_Thea/experiments/quantification_test 5_3D9/str_data/NS/360/3D9_PMA_360NSimage_hoescht059.TIF 3D9_PMA_360NSimage_568058.tif	1750	9,586	0	preAnalysis	none	none	360 NS	qt_5_3D9_man03	/Volumes/Promise RAID/Alf/for_Thea/experiments/quantification_test 5_3D9/3D9_5
180	167	14,084	360	NS	309,311,311,312,312,313,313,312,312,311,311,310,310,308,308,302,302,300,300,299,299,298,298,297,297,298,298,299,299,300,300,301,301,302,302,304,304,309,	16,16,17,17,19,19,24,24,25,25,26,26,28,28,29,29,28,28,27,27,26,26,24,24,22,22,20,20,19,19,18,18,17,17,16,16,15,15,	/Volumes/Promise RAID 2/Alf/for_Thea/experiments/quantification_test 5_3D9/str_data/NS/360/3D9_PMA_360NSimage_hoescht063.TIF 3D9_PMA_360NSimage_568062.tif	1750	14,084	0	preAnalysis	none	none	360 NS	qt_5_3D9_man03	/Volumes/Promise RAID/Alf/for_Thea/experiments/quantification_test 5_3D9/3D9_5
181	174	15,241	360	NS	374,377,377,378,378,379,379,378,378,377,377,375,375,367,367,366,366,365,365,364,364,365,365,366,366,368,368,370,370,374,	102,102,103,103,105,105,112,112,113,113,114,114,115,115,114,114,113,113,112,112,106,106,104,104,103,103,102,102,101,101,	/Volumes/Promise RAID 2/Alf/for_Thea/experiments/quantification_test 5_3D9/str_data/NS/360/3D9_PMA_360NSimage_hoescht063.TIF 3D9_PMA_360NSimage_568062.tif	1750	15,241	0	preAnalysis	none	none	360 NS	qt_5_3D9_man03	/Volumes/Promise RAID/Alf/for_Thea/experiments/quantification_test 5_3D9/3D9_5
182	262	21,992	360	NS	477,482,482,484,484,485,485,486,486,487,487,486,486,487,487,488,488,487,487,486,486,481,481,480,480,479,479,477,477,473,473,471,471,469,469,468,468,466,466,465,465,466,466,467,467,468,468,469,469,470,470,477,	129,129,128,128,129,129,128,128,129,129,133,133,134,134,136,136,137,137,138,138,139,139,140,140,142,142,143,143,144,144,143,143,142,142,141,141,140,140,139,139,138,138,134,134,131,131,130,130,129,129,128,128,	/Volumes/Promise RAID 2/Alf/for_Thea/experiments/quantification_test 5_3D9/str_data/NS/360/3D9_PMA_360NSimage_hoescht063.TIF 3D9_PMA_360NSimage_568062.tif	1750	21,992	0	preAnalysis	none	none	360 NS	qt_5_3D9_man03	/Volumes/Promise RAID/Alf/for_Thea/experiments/quantification_test 5_3D9/3D9_5
183	204	16,069	360	NS	1252,1254,1254,1255,1255,1256,1256,1257,1257,1256,1256,1255,1255,1254,1254,1253,1253,1251,1251,1242,1242,1241,1241,1240,1240,1241,1241,1242,1242,1243,1243,1244,1244,1247,1247,1252,	146,146,147,147,149,149,150,150,154,154,156,156,157,157,158,158,159,159,160,160,159,159,157,157,150,150,149,149,148,148,147,147,146,146,145,145,	/Volumes/Promise RAID 2/Alf/for_Thea/experiments/quantification_test 5_3D9/str_data/NS/360/3D9_PMA_360NSimage_hoescht063.TIF 3D9_PMA_360NSimage_568062.tif	1750	16,069	0	preAnalysis	none	none	360 NS	qt_5_3D9_man03	/Volumes/Promise RAID/Alf/for_Thea/experiments/quantification_test 5_3D9/3D9_5
184	201	16,313	360	NS	383,385,385,386,386,387,387,386,386,385,385,384,384,382,382,379,379,375,375,373,373,372,372,371,371,370,370,371,371,372,372,374,374,376,376,383,	158,158,159,159,161,161,167,167,168,168,169,169,170,170,171,171,172,172,171,171,170,170,169,169,167,167,162,162,161,161,159,159,158,158,157,157,	/Volumes/Promise RAID 2/Alf/for_Thea/experiments/quantification_test 5_3D9/str_data/NS/360/3D9_PMA_360NSimage_hoescht063.TIF 3D9_PMA_360NSimage_568062.tif	1750	16,313	0	preAnalysis	none	none	360 NS	qt_5_3D9_man03	/Volumes/Promise RAID/Alf/for_Thea/experiments/quantification_test 5_3D9/3D9_5
185	171	15,865	360	NS	112,113,113,115,115,116,116,115,115,113,113,112,112,106,106,105,105,103,103,102,102,103,103,104,104,105,105,107,107,112,	174,174,175,175,176,176,184,184,186,186,187,187,188,188,187,187,186,186,184,184,179,179,176,176,175,175,174,174,173,173,	/Volumes/Promise RAID 2/Alf/for_Thea/experiments/quantification_test 5_3D9/str_data/NS/360/3D9_PMA_360NSimage_hoescht063.TIF 3D9_PMA_360NSimage_568062.tif	1750	15,865	0	preAnalysis	none	none	360 NS	qt_5_3D9_man03	/Volumes/Promise RAID/Alf/for_Thea/experiments/quantification_test 5_3D9/3D9_5
186	209	22,373	360	NS	382,381,381,380,380,379,379,378,378,377,377,376,376,375,375,374,374,373,373,372,372,371,371,370,370,368,368,363,363,362,362,361,361,360,360,359,359,360,360,361,361,362,362,363,363,368,368,370,370,372,372,374,374,375,375,376,376,377,377,378,378,379,379,380,380,382,	242,242,244,244,245,245,247,247,248,248,249,249,250,250,251,251,257,257,259,259,260,260,261,261,262,262,263,263,262,262,261,261,260,260,258,258,252,252,250,250,249,249,248,248,247,247,248,248,249,249,250,250,249,249,247,247,246,246,245,245,244,244,243,243,241,241,	/Volumes/Promise RAID 2/Alf/for_Thea/experiments/quantification_test 5_3D9/str_data/NS/360/3D9_PMA_360NSimage_hoescht063.TIF 3D9_PMA_360NSimage_568062.tif	1750	22,373	0	preAnalysis	none	none	360 NS	qt_5_3D9_man03	/Volumes/Promise RAID/Alf/for_Thea/experiments/quantification_test 5_3D9/3D9_5
187	257	17,918	360	NS	939,941,941,944,944,946,946,948,948,949,949,950,950,951,951,952,952,951,951,950,950,949,949,944,944,941,941,940,940,938,938,936,936,935,935,934,934,933,933,932,932,931,931,932,932,934,934,939,	260,260,261,261,262,262,263,263,264,264,265,265,266,266,268,268,274,274,275,275,276,276,277,277,276,276,275,275,274,274,273,273,272,272,270,270,269,269,267,267,265,265,262,262,260,260,259,259,	/Volumes/Promise RAID 2/Alf/for_Thea/experiments/quantification_test 5_3D9/str_data/NS/360/3D9_PMA_360NSimage_hoescht063.TIF 3D9_PMA_360NSimage_568062.tif	1750	17,918	0	preAnalysis	none	none	360 NS	qt_5_3D9_man03	/Volumes/Promise RAID/Alf/for_Thea/experiments/quantification_test 5_3D9/3D9_5
188	189	16,64	360	NS	223,225,225,226,226,227,227,226,226,225,225,224,224,221,221,216,216,214,214,213,213,212,212,211,211,212,212,213,213,214,214,215,215,218,218,223,	278,278,279,279,280,280,288,288,289,289,290,290,291,291,292,292,291,291,289,289,288,288,287,287,283,283,281,281,280,280,279,279,278,278,277,277,	/Volumes/Promise RAID 2/Alf/for_Thea/experiments/quantification_test 5_3D9/str_data/NS/360/3D9_PMA_360NSimage_hoescht063.TIF 3D9_PMA_360NSimage_568062.tif	1750	16,64	0	preAnalysis	none	none	360 NS	qt_5_3D9_man03	/Volumes/Promise RAID/Alf/for_Thea/experiments/quantification_test 5_3D9/3D9_5
189	177	16,672	360	NS	338,341,341,342,342,343,343,342,342,341,341,340,340,339,339,338,338,333,333,331,331,330,330,329,329,328,328,327,327,328,328,329,329,331,331,338,	311,311,312,312,313,313,319,319,320,320,321,321,322,322,323,323,324,324,323,323,322,322,321,321,320,320,319,319,314,314,312,312,311,311,310,310,	/Volumes/Promise RAID 2/Alf/for_Thea/experiments/quantification_test 5_3D9/str_data/NS/360/3D9_PMA_360NSimage_hoescht063.TIF 3D9_PMA_360NSimage_568062.tif	1750	16,672	0	preAnalysis	none	none	360 NS	qt_5_3D9_man03	/Volumes/Promise RAID/Alf/for_Thea/experiments/quantification_test 5_3D9/3D9_5
190	228	20,82	360	NS	851,853,853,854,854,855,855,856,856,857,857,856,856,855,855,853,853,850,850,846,846,844,844,843,843,842,842,841,841,840,840,841,841,842,842,844,844,851,	311,311,312,312,313,313,315,315,318,318,321,321,324,324,325,325,326,326,327,327,326,326,325,325,324,324,323,323,320,320,313,313,312,312,311,311,310,310,	/Volumes/Promise RAID 2/Alf/for_Thea/experiments/quantification_test 5_3D9/str_data/NS/360/3D9_PMA_360NSimage_hoescht063.TIF 3D9_PMA_360NSimage_568062.tif	1750	20,82	0	preAnalysis	none	none	360 NS	qt_5_3D9_man03	/Volumes/Promise RAID/Alf/for_Thea/experiments/quantification_test 5_3D9/3D9_5
191	217	19,562	360	NS	478,480,480,481,481,482,482,483,483,484,484,483,483,482,482,481,481,480,480,478,478,471,471,469,469,468,468,467,467,466,466,467,467,468,468,469,469,470,470,472,472,478,	333,333,334,334,335,335,336,336,340,340,341,341,344,344,345,345,346,346,347,347,348,348,347,347,346,346,344,344,340,340,339,339,336,336,335,335,334,334,333,333,332,332,	/Volumes/Promise RAID 2/Alf/for_Thea/experiments/quantification_test 5_3D9/str_data/NS/360/3D9_PMA_360NSimage_hoescht063.TIF 3D9_PMA_360NSimage_568062.tif	1750	19,562	0	preAnalysis	none	none	360 NS	qt_5_3D9_man03	/Volumes/Promise RAID/Alf/for_Thea/experiments/quantification_test 5_3D9/3D9_5
192	192	18,042	360	NS	359,361,361,362,362,363,363,362,362,360,360,359,359,353,353,351,351,349,349,348,348,347,347,348,348,349,349,350,350,352,352,354,354,359,	405,405,406,406,408,408,415,415,417,417,418,418,419,419,418,418,417,417,416,416,415,415,409,409,408,408,407,407,406,406,405,405,404,404,	/Volumes/Promise RAID 2/Alf/for_Thea/experiments/quantification_test 5_3D9/str_data/NS/360/3D9_PMA_360NSimage_hoescht063.TIF 3D9_PMA_360NSimage_568062.tif	1750	18,042	0	preAnalysis	none	none	360 NS	qt_5_3D9_man03	/Volumes/Promise RAID/Alf/for_Thea/experiments/quantification_test 5_3D9/3D9_5
193	188	19,505	360	NS	1275,1277,1277,1278,1278,1279,1279,1280,1280,1279,1279,1278,1278,1277,1277,1276,1276,1274,1274,1270,1270,1268,1268,1266,1266,1265,1265,1264,1264,1265,1265,1266,1266,1268,1268,1269,1269,1271,1271,1275,	417,417,418,418,420,420,422,422,426,426,428,428,429,429,430,430,431,431,432,432,431,431,430,430,428,428,427,427,423,423,421,421,419,419,418,418,417,417,416,416,	/Volumes/Promise RAID 2/Alf/for_Thea/experiments/quantification_test 5_3D9/str_data/NS/360/3D9_PMA_360NSimage_hoescht063.TIF 3D9_PMA_360NSimage_568062.tif	1750	19,505	0	preAnalysis	none	none	360 NS	qt_5_3D9_man03	/Volumes/Promise RAID/Alf/for_Thea/experiments/quantification_test 5_3D9/3D9_5
194	191	17,723	360	NS	330,332,332,333,333,334,334,333,333,332,332,331,331,330,330,328,328,323,323,320,320,319,319,318,318,319,319,320,320,322,322,324,324,330,	464,464,465,465,467,467,472,472,473,473,475,475,476,476,477,477,478,478,477,477,476,476,474,474,468,468,466,466,465,465,464,464,463,463,	/Volumes/Promise RAID 2/Alf/for_Thea/experiments/quantification_test 5_3D9/str_data/NS/360/3D9_PMA_360NSimage_hoescht063.TIF 3D9_PMA_360NSimage_568062.tif	1750	17,723	0	preAnalysis	none	none	360 NS	qt_5_3D9_man03	/Volumes/Promise RAID/Alf/for_Thea/experiments/quantification_test 5_3D9/3D9_5
195	222	20,356	360	NS	1126,1129,1129,1130,1130,1131,1131,1132,1132,1133,1133,1132,1132,1131,1131,1130,1130,1129,1129,1128,1128,1122,1122,1120,1120,1118,1118,1117,1117,1116,1116,1117,1117,1118,1118,1120,1120,1122,1122,1126,	470,470,471,471,472,472,473,473,477,477,479,479,482,482,483,483,484,484,485,485,486,486,485,485,484,484,483,483,481,481,475,475,473,473,471,471,470,470,469,469,	/Volumes/Promise RAID 2/Alf/for_Thea/experiments/quantification_test 5_3D9/str_data/NS/360/3D9_PMA_360NSimage_hoescht063.TIF 3D9_PMA_360NSimage_568062.tif	1750	20,356	0	preAnalysis	none	none	360 NS	qt_5_3D9_man03	/Volumes/Promise RAID/Alf/for_Thea/experiments/quantification_test 5_3D9/3D9_5
196	141	7,83	360	NS	14,17,17,18,18,19,19,20,20,19,19,13,13,10,10,9,9,8,8,7,7,6,6,7,7,8,8,12,12,14,	479,479,480,480,481,481,482,482,489,489,490,490,491,491,490,490,489,489,488,488,486,486,482,482,480,480,479,479,478,478,	/Volumes/Promise RAID 2/Alf/for_Thea/experiments/quantification_test 5_3D9/str_data/NS/360/3D9_PMA_360NSimage_hoescht063.TIF 3D9_PMA_360NSimage_568062.tif	1750	7,83	0	preAnalysis	none	none	360 NS	qt_5_3D9_man03	/Volumes/Promise RAID/Alf/for_Thea/experiments/quantification_test 5_3D9/3D9_5
197	198	18,258	360	NS	690,692,692,693,693,694,694,695,695,694,694,693,693,691,691,690,690,686,686,683,683,681,681,680,680,679,679,678,678,679,679,680,680,682,682,690,	495,495,496,496,497,497,498,498,502,502,504,504,506,506,507,507,508,508,509,509,508,508,507,507,506,506,504,504,499,499,497,497,495,495,494,494,	/Volumes/Promise RAID 2/Alf/for_Thea/experiments/quantification_test 5_3D9/str_data/NS/360/3D9_PMA_360NSimage_hoescht063.TIF 3D9_PMA_360NSimage_568062.tif	1750	18,258	0	preAnalysis	none	none	360 NS	qt_5_3D9_man03	/Volumes/Promise RAID/Alf/for_Thea/experiments/quantification_test 5_3D9/3D9_5
198	192	20,13	360	NS	866,868,868,869,869,870,870,871,871,870,870,869,869,868,868,866,866,861,861,859,859,858,858,857,857,856,856,857,857,858,858,859,859,861,861,866,	499,499,500,500,501,501,503,503,509,509,510,510,512,512,513,513,514,514,513,513,512,512,511,511,509,509,502,502,501,501,500,500,499,499,498,498,	/Volumes/Promise RAID 2/Alf/for_Thea/experiments/quantification_test 5_3D9/str_data/NS/360/3D9_PMA_360NSimage_hoescht063.TIF 3D9_PMA_360NSimage_568062.tif	1750	20,13	0	preAnalysis	none	none	360 NS	qt_5_3D9_man03	/Volumes/Promise RAID/Alf/for_Thea/experiments/quantification_test 5_3D9/3D9_5
199	218	23,257	360	NS	1014,1016,1016,1017,1017,1018,1018,1017,1017,1016,1016,1015,1015,1013,1013,1007,1007,1005,1005,1003,1003,1002,1002,1001,1001,1002,1002,1003,1003,1004,1004,1005,1005,1008,1008,1014,	514,514,516,516,518,518,523,523,526,526,527,527,528,528,529,529,528,528,527,527,526,526,524,524,518,518,517,517,516,516,515,515,514,514,513,513,	/Volumes/Promise RAID 2/Alf/for_Thea/experiments/quantification_test 5_3D9/str_data/NS/360/3D9_PMA_360NSimage_hoescht063.TIF 3D9_PMA_360NSimage_568062.tif	1750	23,257	0	preAnalysis	none	none	360 NS	qt_5_3D9_man03	/Volumes/Promise RAID/Alf/for_Thea/experiments/quantification_test 5_3D9/3D9_5
200	188	19,973	360	NS	482,484,484,485,485,486,486,485,485,484,484,482,482,480,480,476,476,475,475,473,473,472,472,471,471,470,470,471,471,473,473,475,475,482,	516,516,517,517,519,519,524,524,526,526,528,528,529,529,530,530,529,529,528,528,527,527,526,526,524,524,519,519,517,517,516,516,515,515,	/Volumes/Promise RAID 2/Alf/for_Thea/experiments/quantification_test 5_3D9/str_data/NS/360/3D9_PMA_360NSimage_hoescht063.TIF 3D9_PMA_360NSimage_568062.tif	1750	19,973	0	preAnalysis	none	none	360 NS	qt_5_3D9_man03	/Volumes/Promise RAID/Alf/for_Thea/experiments/quantification_test 5_3D9/3D9_5
201	157	12,478	360	NS	22,24,24,25,25,26,26,27,27,26,26,25,25,24,24,18,18,16,16,15,15,14,14,13,13,12,12,13,13,14,14,15,15,16,16,22,	548,548,549,549,550,550,552,552,555,555,558,558,560,560,561,561,560,560,559,559,558,558,556,556,553,553,552,552,550,550,549,549,548,548,547,547,	/Volumes/Promise RAID 2/Alf/for_Thea/experiments/quantification_test 5_3D9/str_data/NS/360/3D9_PMA_360NSimage_hoescht063.TIF 3D9_PMA_360NSimage_568062.tif	1750	12,478	0	preAnalysis	none	none	360 NS	qt_5_3D9_man03	/Volumes/Promise RAID/Alf/for_Thea/experiments/quantification_test 5_3D9/3D9_5
202	191	17,508	360	NS	325,328,328,329,329,331,331,332,332,333,333,332,332,331,331,330,330,329,329,328,328,322,322,320,320,319,319,318,318,317,317,318,318,319,319,320,320,321,321,323,323,325,	553,553,554,554,555,555,556,556,557,557,562,562,564,564,565,565,566,566,567,567,568,568,567,567,566,566,565,565,563,563,558,558,556,556,555,555,554,554,553,553,552,552,	/Volumes/Promise RAID 2/Alf/for_Thea/experiments/quantification_test 5_3D9/str_data/NS/360/3D9_PMA_360NSimage_hoescht063.TIF 3D9_PMA_360NSimage_568062.tif	1750	17,508	0	preAnalysis	none	none	360 NS	qt_5_3D9_man03	/Volumes/Promise RAID/Alf/for_Thea/experiments/quantification_test 5_3D9/3D9_5
203	209	22,024	360	NS	766,767,767,768,768,769,769,770,770,769,769,768,768,767,767,765,765,758,758,756,756,755,755,754,754,753,753,754,754,755,755,756,756,757,757,758,758,760,760,766,	559,559,560,560,561,561,563,563,567,567,570,570,572,572,573,573,574,574,573,573,572,572,571,571,568,568,566,566,563,563,562,562,561,561,560,560,559,559,558,558,	/Volumes/Promise RAID 2/Alf/for_Thea/experiments/quantification_test 5_3D9/str_data/NS/360/3D9_PMA_360NSimage_hoescht063.TIF 3D9_PMA_360NSimage_568062.tif	1750	22,024	0	preAnalysis	none	none	360 NS	qt_5_3D9_man03	/Volumes/Promise RAID/Alf/for_Thea/experiments/quantification_test 5_3D9/3D9_5
204	142	14,444	360	NS	143,144,144,145,145,146,146,145,145,144,144,143,143,142,142,138,138,137,137,136,136,135,135,134,134,135,135,136,136,137,137,139,139,143,	584,584,585,585,586,586,591,591,594,594,596,596,598,598,599,599,598,598,596,596,595,595,592,592,588,588,586,586,585,585,584,584,583,583,	/Volumes/Promise RAID 2/Alf/for_Thea/experiments/quantification_test 5_3D9/str_data/NS/360/3D9_PMA_360NSimage_hoescht063.TIF 3D9_PMA_360NSimage_568062.tif	1750	14,444	0	preAnalysis	none	none	360 NS	qt_5_3D9_man03	/Volumes/Promise RAID/Alf/for_Thea/experiments/quantification_test 5_3D9/3D9_5
205	211	21,194	360	NS	761,763,763,764,764,765,765,766,766,765,765,764,764,763,763,762,762,761,761,759,759,755,755,753,753,752,752,751,751,750,750,749,749,750,750,751,751,753,753,761,	641,641,642,642,643,643,644,644,648,648,650,650,652,652,653,653,654,654,655,655,656,656,655,655,654,654,653,653,652,652,650,650,644,644,642,642,641,641,640,640,	/Volumes/Promise RAID 2/Alf/for_Thea/experiments/quantification_test 5_3D9/str_data/NS/360/3D9_PMA_360NSimage_hoescht063.TIF 3D9_PMA_360NSimage_568062.tif	1750	21,194	0	preAnalysis	none	none	360 NS	qt_5_3D9_man03	/Volumes/Promise RAID/Alf/for_Thea/experiments/quantification_test 5_3D9/3D9_5
206	200	22,695	360	NS	747,748,748,749,749,750,750,749,749,748,748,747,747,746,746,744,744,739,739,737,737,735,735,734,734,733,733,734,734,735,735,737,737,738,738,747,	679,679,680,680,683,683,686,686,689,689,690,690,691,691,692,692,693,693,692,692,691,691,689,689,687,687,683,683,681,681,680,680,679,679,678,678,	/Volumes/Promise RAID 2/Alf/for_Thea/experiments/quantification_test 5_3D9/str_data/NS/360/3D9_PMA_360NSimage_hoescht063.TIF 3D9_PMA_360NSimage_568062.tif	1750	22,695	0	preAnalysis	none	none	360 NS	qt_5_3D9_man03	/Volumes/Promise RAID/Alf/for_Thea/experiments/quantification_test 5_3D9/3D9_5
207	230	21,07	360	NS	725,726,726,727,727,728,728,729,729,728,728,727,727,725,725,719,719,717,717,716,716,715,715,714,714,713,713,712,712,713,713,714,714,715,715,717,717,725,	726,726,727,727,728,728,730,730,738,738,740,740,741,741,742,742,741,741,740,740,739,739,738,738,737,737,733,733,732,732,729,729,727,727,726,726,725,725,	/Volumes/Promise RAID 2/Alf/for_Thea/experiments/quantification_test 5_3D9/str_data/NS/360/3D9_PMA_360NSimage_hoescht063.TIF 3D9_PMA_360NSimage_568062.tif	1750	21,07	0	preAnalysis	none	none	360 NS	qt_5_3D9_man03	/Volumes/Promise RAID/Alf/for_Thea/experiments/quantification_test 5_3D9/3D9_5
208	268	16,571	360	NS	1209,1212,1212,1213,1213,1215,1215,1216,1216,1217,1217,1218,1218,1217,1217,1215,1215,1214,1214,1211,1211,1207,1207,1203,1203,1202,1202,1201,1201,1200,1200,1199,1199,1200,1200,1201,1201,1203,1203,1209,	748,748,749,749,750,750,752,752,753,753,755,755,760,760,762,762,763,763,764,764,765,765,764,764,763,763,762,762,761,761,759,759,752,752,749,749,748,748,747,747,	/Volumes/Promise RAID 2/Alf/for_Thea/experiments/quantification_test 5_3D9/str_data/NS/360/3D9_PMA_360NSimage_hoescht063.TIF 3D9_PMA_360NSimage_568062.tif	1750	16,571	0	preAnalysis	none	none	360 NS	qt_5_3D9_man03	/Volumes/Promise RAID/Alf/for_Thea/experiments/quantification_test 5_3D9/3D9_5
209	188	18,218	360	NS	513,514,514,515,515,516,516,517,517,518,518,519,519,518,518,517,517,515,515,514,514,508,508,505,505,504,504,503,503,504,504,505,505,507,507,513,	750,750,751,751,752,752,753,753,754,754,755,755,759,759,761,761,762,762,763,763,764,764,763,763,761,761,760,760,753,753,751,751,750,750,749,749,	/Volumes/Promise RAID 2/Alf/for_Thea/experiments/quantification_test 5_3D9/str_data/NS/360/3D9_PMA_360NSimage_hoescht063.TIF 3D9_PMA_360NSimage_568062.tif	1750	18,218	0	preAnalysis	none	none	360 NS	qt_5_3D9_man03	/Volumes/Promise RAID/Alf/for_Thea/experiments/quantification_test 5_3D9/3D9_5
210	181	21,923	360	NS	519,521,521,522,522,523,523,522,522,521,521,520,520,518,518,511,511,510,510,509,509,508,508,509,509,510,510,512,512,515,515,519,	796,796,797,797,799,799,804,804,806,806,808,808,809,809,810,810,809,809,808,808,806,806,800,800,798,798,797,797,796,796,795,795,	/Volumes/Promise RAID 2/Alf/for_Thea/experiments/quantification_test 5_3D9/str_data/NS/360/3D9_PMA_360NSimage_hoescht063.TIF 3D9_PMA_360NSimage_568062.tif	1750	21,923	0	preAnalysis	none	none	360 NS	qt_5_3D9_man03	/Volumes/Promise RAID/Alf/for_Thea/experiments/quantification_test 5_3D9/3D9_5
211	198	18,212	360	NS	614,615,615,616,616,617,617,618,618,617,617,616,616,615,615,614,614,613,613,611,611,606,606,605,605,604,604,603,603,602,602,603,603,604,604,605,605,606,606,607,607,609,609,614,	803,803,804,804,806,806,808,808,812,812,814,814,815,815,816,816,817,817,818,818,819,819,818,818,817,817,816,816,812,812,811,811,807,807,806,806,805,805,804,804,803,803,802,802,	/Volumes/Promise RAID 2/Alf/for_Thea/experiments/quantification_test 5_3D9/str_data/NS/360/3D9_PMA_360NSimage_hoescht063.TIF 3D9_PMA_360NSimage_568062.tif	1750	18,212	0	preAnalysis	none	none	360 NS	qt_5_3D9_man03	/Volumes/Promise RAID/Alf/for_Thea/experiments/quantification_test 5_3D9/3D9_5
212	139	16,54	360	NS	88,89,89,91,91,92,92,91,91,90,90,89,89,88,88,82,82,80,80,79,79,80,80,82,82,88,	808,808,810,810,811,811,816,816,817,817,818,818,819,819,820,820,819,819,817,817,809,809,808,808,807,807,	/Volumes/Promise RAID 2/Alf/for_Thea/experiments/quantification_test 5_3D9/str_data/NS/360/3D9_PMA_360NSimage_hoescht063.TIF 3D9_PMA_360NSimage_568062.tif	1750	16,54	0	preAnalysis	none	none	360 NS	qt_5_3D9_man03	/Volumes/Promise RAID/Alf/for_Thea/experiments/quantification_test 5_3D9/3D9_5
213	218	22,771	360	NS	798,799,799,800,800,801,801,802,802,801,801,800,800,798,798,797,797,790,790,789,789,788,788,787,787,786,786,785,785,786,786,787,787,788,788,790,790,798,	834,834,835,835,837,837,840,840,843,843,846,846,847,847,848,848,849,849,848,848,847,847,846,846,845,845,844,844,837,837,836,836,835,835,834,834,833,833,	/Volumes/Promise RAID 2/Alf/for_Thea/experiments/quantification_test 5_3D9/str_data/NS/360/3D9_PMA_360NSimage_hoescht063.TIF 3D9_PMA_360NSimage_568062.tif	1750	22,771	0	preAnalysis	none	none	360 NS	qt_5_3D9_man03	/Volumes/Promise RAID/Alf/for_Thea/experiments/quantification_test 5_3D9/3D9_5
214	130	11,077	360	NS	219,223,223,225,225,226,226,225,225,224,224,220,220,218,218,214,214,213,213,212,212,211,211,212,212,213,213,214,214,215,215,219,	846,846,847,847,849,849,854,854,855,855,856,856,855,855,856,856,855,855,854,854,852,852,850,850,848,848,847,847,846,846,845,845,	/Volumes/Promise RAID 2/Alf/for_Thea/experiments/quantification_test 5_3D9/str_data/NS/360/3D9_PMA_360NSimage_hoescht063.TIF 3D9_PMA_360NSimage_568062.tif	1750	11,077	0	preAnalysis	none	none	360 NS	qt_5_3D9_man03	/Volumes/Promise RAID/Alf/for_Thea/experiments/quantification_test 5_3D9/3D9_5
215	158	17,899	360	NS	253,259,259,260,260,261,261,260,260,259,259,258,258,254,254,253,253,250,250,249,249,248,248,247,247,248,248,249,249,248,248,249,249,251,251,252,252,253,	865,865,868,868,871,871,874,874,875,875,878,878,879,879,880,880,879,879,878,878,877,877,874,874,872,872,870,870,868,868,867,867,866,866,865,865,864,864,	/Volumes/Promise RAID 2/Alf/for_Thea/experiments/quantification_test 5_3D9/str_data/NS/360/3D9_PMA_360NSimage_hoescht063.TIF 3D9_PMA_360NSimage_568062.tif	1750	17,899	0	preAnalysis	none	none	360 NS	qt_5_3D9_man03	/Volumes/Promise RAID/Alf/for_Thea/experiments/quantification_test 5_3D9/3D9_5
216	196	15,102	360	NS	233,234,234,238,238,239,239,240,240,241,241,240,240,241,241,242,242,241,241,240,240,239,239,235,235,232,232,230,230,229,229,228,228,227,227,226,226,227,227,228,228,229,229,233,	879,879,881,881,882,882,883,883,885,885,886,886,890,890,892,892,893,893,894,894,895,895,896,896,895,895,894,894,893,893,892,892,891,891,888,888,887,887,880,880,879,879,878,878,	/Volumes/Promise RAID 2/Alf/for_Thea/experiments/quantification_test 5_3D9/str_data/NS/360/3D9_PMA_360NSimage_hoescht063.TIF 3D9_PMA_360NSimage_568062.tif	1750	15,102	0	preAnalysis	none	none	360 NS	qt_5_3D9_man03	/Volumes/Promise RAID/Alf/for_Thea/experiments/quantification_test 5_3D9/3D9_5
217	202	18,02	360	NS	530,532,532,533,533,534,534,535,535,536,536,535,535,534,534,532,532,522,522,521,521,520,520,519,519,520,520,521,521,523,523,525,525,527,527,530,	897,897,898,898,899,899,900,900,901,901,907,907,909,909,910,910,911,911,910,910,909,909,907,907,902,902,900,900,899,899,898,898,897,897,896,896,	/Volumes/Promise RAID 2/Alf/for_Thea/experiments/quantification_test 5_3D9/str_data/NS/360/3D9_PMA_360NSimage_hoescht063.TIF 3D9_PMA_360NSimage_568062.tif	1750	18,02	0	preAnalysis	none	none	360 NS	qt_5_3D9_man03	/Volumes/Promise RAID/Alf/for_Thea/experiments/quantification_test 5_3D9/3D9_5
218	223	21,812	360	NS	1070,1072,1072,1073,1073,1074,1074,1075,1075,1076,1076,1075,1075,1074,1074,1073,1073,1072,1072,1064,1064,1063,1063,1062,1062,1061,1061,1060,1060,1061,1061,1062,1062,1063,1063,1065,1065,1070,	938,938,939,939,940,940,941,941,942,942,950,950,951,951,952,952,953,953,954,954,953,953,952,952,951,951,949,949,942,942,940,940,939,939,938,938,937,937,	/Volumes/Promise RAID 2/Alf/for_Thea/experiments/quantification_test 5_3D9/str_data/NS/360/3D9_PMA_360NSimage_hoescht063.TIF 3D9_PMA_360NSimage_568062.tif	1750	21,812	0	preAnalysis	none	none	360 NS	qt_5_3D9_man03	/Volumes/Promise RAID/Alf/for_Thea/experiments/quantification_test 5_3D9/3D9_5
219	171	12,257	120	PMA	143,144,144,145,145,146,146,147,147,148,148,147,147,146,146,144,144,140,140,138,138,136,136,135,135,134,134,133,133,134,134,135,135,137,137,143,	6,6,7,7,8,8,9,9,11,11,17,17,18,18,19,19,20,20,19,19,18,18,17,17,15,15,13,13,10,10,8,8,6,6,5,5,	/Volumes/Promise RAID 2/Alf/for_Thea/experiments/quantification_test 5_3D9/str_data/PMA/120/3D9_PMA_120image_hoescht179.TIF 3D9_PMA_120image_568178.tif	1750	12,257	0	preAnalysis	none	none	120 PMA	qt_5_3D9_man03	/Volumes/Promise RAID/Alf/for_Thea/experiments/quantification_test 5_3D9/3D9_5
220	228	14,588	120	PMA	1192,1194,1194,1195,1195,1196,1196,1195,1195,1194,1194,1193,1193,1192,1192,1191,1191,1189,1189,1186,1186,1185,1185,1181,1181,1180,1180,1179,1179,1180,1180,1181,1181,1182,1182,1183,1183,1185,1185,1187,1187,1192,	11,11,13,13,14,14,19,19,22,22,23,23,24,24,25,25,26,26,27,27,28,28,27,27,26,26,25,25,18,18,15,15,14,14,13,13,12,12,11,11,10,10,	/Volumes/Promise RAID 2/Alf/for_Thea/experiments/quantification_test 5_3D9/str_data/PMA/120/3D9_PMA_120image_hoescht179.TIF 3D9_PMA_120image_568178.tif	1750	14,588	0	preAnalysis	none	none	120 PMA	qt_5_3D9_man03	/Volumes/Promise RAID/Alf/for_Thea/experiments/quantification_test 5_3D9/3D9_5
221	291	12,151	120	PMA	1001,1003,1003,1004,1004,1005,1005,1006,1006,1007,1007,1006,1006,1005,1005,1004,1004,1002,1002,1000,1000,998,998,995,995,992,992,990,990,989,989,988,988,989,989,991,991,993,993,995,995,1001,	63,63,64,64,66,66,67,67,69,69,74,74,77,77,79,79,80,80,81,81,82,82,81,81,80,80,79,79,77,77,76,76,69,69,66,66,64,64,63,63,62,62,	/Volumes/Promise RAID 2/Alf/for_Thea/experiments/quantification_test 5_3D9/str_data/PMA/120/3D9_PMA_120image_hoescht179.TIF 3D9_PMA_120image_568178.tif	1750	12,151	0	preAnalysis	none	none	120 PMA	qt_5_3D9_man03	/Volumes/Promise RAID/Alf/for_Thea/experiments/quantification_test 5_3D9/3D9_5
222	358	19,651	120	PMA	686,689,689,691,691,692,692,693,693,694,694,695,695,694,694,693,693,692,692,691,691,689,689,679,679,678,678,676,676,675,675,674,674,673,673,672,672,673,673,674,674,676,676,677,677,678,678,680,680,684,684,686,	125,125,126,126,127,127,128,128,130,130,132,132,136,136,139,139,141,141,142,142,143,143,144,144,145,145,144,144,143,143,142,142,141,141,138,138,135,135,131,131,129,129,128,128,127,127,126,126,125,125,124,124,	/Volumes/Promise RAID 2/Alf/for_Thea/experiments/quantification_test 5_3D9/str_data/PMA/120/3D9_PMA_120image_hoescht179.TIF 3D9_PMA_120image_568178.tif	1750	19,651	0	preAnalysis	none	none	120 PMA	qt_5_3D9_man03	/Volumes/Promise RAID/Alf/for_Thea/experiments/quantification_test 5_3D9/3D9_5
223	289	11,958	120	PMA	1131,1133,1133,1134,1134,1135,1135,1136,1136,1137,1137,1136,1136,1135,1135,1133,1133,1132,1132,1124,1124,1122,1122,1121,1121,1120,1120,1119,1119,1118,1118,1119,1119,1120,1120,1121,1121,1122,1122,1124,1124,1131,	177,177,178,178,179,179,182,182,184,184,189,189,191,191,193,193,194,194,195,195,194,194,193,193,192,192,191,191,190,190,183,183,181,181,180,180,178,178,177,177,176,176,	/Volumes/Promise RAID 2/Alf/for_Thea/experiments/quantification_test 5_3D9/str_data/PMA/120/3D9_PMA_120image_hoescht179.TIF 3D9_PMA_120image_568178.tif	1750	11,958	0	preAnalysis	none	none	120 PMA	qt_5_3D9_man03	/Volumes/Promise RAID/Alf/for_Thea/experiments/quantification_test 5_3D9/3D9_5
224	316	13,367	120	PMA	1063,1064,1064,1065,1065,1066,1066,1067,1067,1066,1066,1065,1065,1064,1064,1062,1062,1060,1060,1052,1052,1050,1050,1049,1049,1048,1048,1047,1047,1046,1046,1045,1045,1046,1046,1047,1047,1049,1049,1051,1051,1056,1056,1063,	180,180,181,181,182,182,184,184,190,190,192,192,193,193,195,195,196,196,197,197,196,196,195,195,194,194,193,193,192,192,191,191,185,185,183,183,182,182,181,181,180,180,179,179,	/Volumes/Promise RAID 2/Alf/for_Thea/experiments/quantification_test 5_3D9/str_data/PMA/120/3D9_PMA_120image_hoescht179.TIF 3D9_PMA_120image_568178.tif	1750	13,367	0	preAnalysis	none	none	120 PMA	qt_5_3D9_man03	/Volumes/Promise RAID/Alf/for_Thea/experiments/quantification_test 5_3D9/3D9_5
225	194	9,485	120	PMA	216,218,218,219,219,220,220,221,221,222,222,221,221,220,220,219,219,214,214,212,212,209,209,207,207,206,206,205,205,204,204,205,205,206,206,207,207,208,208,210,210,216,	184,184,185,185,186,186,187,187,193,193,194,194,196,196,197,197,198,198,197,197,196,196,195,195,194,194,193,193,191,191,190,190,187,187,186,186,185,185,184,184,183,183,	/Volumes/Promise RAID 2/Alf/for_Thea/experiments/quantification_test 5_3D9/str_data/PMA/120/3D9_PMA_120image_hoescht179.TIF 3D9_PMA_120image_568178.tif	1750	9,485	0	preAnalysis	none	none	120 PMA	qt_5_3D9_man03	/Volumes/Promise RAID/Alf/for_Thea/experiments/quantification_test 5_3D9/3D9_5
226	222	14,486	120	PMA	796,798,798,799,799,800,800,801,801,800,800,799,799,798,798,797,797,796,796,794,794,789,789,787,787,786,786,785,785,784,784,785,785,786,786,787,787,788,788,789,789,796,	184,184,185,185,186,186,188,188,192,192,195,195,196,196,197,197,198,198,199,199,200,200,199,199,198,198,196,196,195,195,189,189,188,188,187,187,185,185,184,184,183,183,	/Volumes/Promise RAID 2/Alf/for_Thea/experiments/quantification_test 5_3D9/str_data/PMA/120/3D9_PMA_120image_hoescht179.TIF 3D9_PMA_120image_568178.tif	1750	14,486	0	preAnalysis	none	none	120 PMA	qt_5_3D9_man03	/Volumes/Promise RAID/Alf/for_Thea/experiments/quantification_test 5_3D9/3D9_5
227	166	8,771	120	PMA	91,92,92,95,95,96,96,97,97,98,98,97,97,95,95,89,89,87,87,86,86,84,84,83,83,84,84,85,85,91,	210,210,211,211,212,212,213,213,215,215,220,220,222,222,223,223,222,222,221,221,220,220,217,217,211,211,210,210,209,209,	/Volumes/Promise RAID 2/Alf/for_Thea/experiments/quantification_test 5_3D9/str_data/PMA/120/3D9_PMA_120image_hoescht179.TIF 3D9_PMA_120image_568178.tif	1750	8,771	0	preAnalysis	none	none	120 PMA	qt_5_3D9_man03	/Volumes/Promise RAID/Alf/for_Thea/experiments/quantification_test 5_3D9/3D9_5
228	250	12,864	120	PMA	513,516,516,519,519,520,520,521,521,520,520,519,519,518,518,517,517,512,512,510,510,509,509,508,508,507,507,506,506,505,505,504,504,503,503,504,504,505,505,506,506,507,507,512,512,513,	240,240,241,241,243,243,246,246,253,253,254,254,256,256,257,257,258,258,257,257,256,256,255,255,254,254,253,253,252,252,251,251,248,248,245,245,244,244,242,242,241,241,240,240,239,239,	/Volumes/Promise RAID 2/Alf/for_Thea/experiments/quantification_test 5_3D9/str_data/PMA/120/3D9_PMA_120image_hoescht179.TIF 3D9_PMA_120image_568178.tif	1750	12,864	0	preAnalysis	none	none	120 PMA	qt_5_3D9_man03	/Volumes/Promise RAID/Alf/for_Thea/experiments/quantification_test 5_3D9/3D9_5
229	296	15,26	120	PMA	978,981,981,983,983,984,984,985,985,986,986,987,987,986,986,987,987,986,986,985,985,984,984,983,983,976,976,975,975,974,974,972,972,971,971,970,970,969,969,968,968,969,969,970,970,971,971,973,973,976,976,978,	254,254,255,255,257,257,258,258,260,260,265,265,267,267,268,268,269,269,270,270,271,271,272,272,273,273,272,272,273,273,272,272,271,271,270,270,269,269,267,267,259,259,257,257,256,256,255,255,254,254,253,253,	/Volumes/Promise RAID 2/Alf/for_Thea/experiments/quantification_test 5_3D9/str_data/PMA/120/3D9_PMA_120image_hoescht179.TIF 3D9_PMA_120image_568178.tif	1750	15,26	0	preAnalysis	none	none	120 PMA	qt_5_3D9_man03	/Volumes/Promise RAID/Alf/for_Thea/experiments/quantification_test 5_3D9/3D9_5
230	309	13,049	120	PMA	687,688,688,689,689,697,697,699,699,700,700,701,701,702,702,701,701,700,700,699,699,696,696,694,694,693,693,687,687,685,685,682,682,681,681,680,680,679,679,678,678,679,679,680,680,682,682,687,	273,273,272,272,273,273,274,274,275,275,276,276,278,278,282,282,284,284,286,286,287,287,288,288,289,289,288,288,287,287,286,286,285,285,284,284,283,283,281,281,276,276,274,274,273,273,272,272,	/Volumes/Promise RAID 2/Alf/for_Thea/experiments/quantification_test 5_3D9/str_data/PMA/120/3D9_PMA_120image_hoescht179.TIF 3D9_PMA_120image_568178.tif	1750	13,049	0	preAnalysis	none	none	120 PMA	qt_5_3D9_man03	/Volumes/Promise RAID/Alf/for_Thea/experiments/quantification_test 5_3D9/3D9_5
231	202	10,455	120	PMA	320,324,324,325,325,326,326,327,327,328,328,329,329,328,328,327,327,326,326,324,324,317,317,316,316,315,315,314,314,313,313,314,314,315,315,316,316,317,317,319,319,320,	279,279,280,280,281,281,282,282,284,284,286,286,290,290,292,292,293,293,294,294,295,295,294,294,293,293,292,292,290,290,286,286,283,283,281,281,280,280,279,279,278,278,	/Volumes/Promise RAID 2/Alf/for_Thea/experiments/quantification_test 5_3D9/str_data/PMA/120/3D9_PMA_120image_hoescht179.TIF 3D9_PMA_120image_568178.tif	1750	10,455	0	preAnalysis	none	none	120 PMA	qt_5_3D9_man03	/Volumes/Promise RAID/Alf/for_Thea/experiments/quantification_test 5_3D9/3D9_5
232	246	15,508	120	PMA	516,520,520,523,523,524,524,525,525,526,526,525,525,524,524,523,523,521,521,514,514,512,512,510,510,509,509,508,508,507,507,508,508,509,509,511,511,513,513,516,	279,279,280,280,281,281,282,282,285,285,289,289,291,291,293,293,294,294,295,295,294,294,293,293,291,291,290,290,287,287,284,284,282,282,280,280,279,279,278,278,	/Volumes/Promise RAID 2/Alf/for_Thea/experiments/quantification_test 5_3D9/str_data/PMA/120/3D9_PMA_120image_hoescht179.TIF 3D9_PMA_120image_568178.tif	1750	15,508	0	preAnalysis	none	none	120 PMA	qt_5_3D9_man03	/Volumes/Promise RAID/Alf/for_Thea/experiments/quantification_test 5_3D9/3D9_5
233	203	15,01	120	PMA	589,593,593,595,595,596,596,597,597,598,598,597,597,595,595,594,594,587,587,585,585,584,584,583,583,582,582,583,583,584,584,587,587,589,	283,283,284,284,285,285,286,286,288,288,294,294,296,296,297,297,298,298,297,297,296,296,294,294,292,292,286,286,284,284,283,283,282,282,	/Volumes/Promise RAID 2/Alf/for_Thea/experiments/quantification_test 5_3D9/str_data/PMA/120/3D9_PMA_120image_hoescht179.TIF 3D9_PMA_120image_568178.tif	1750	15,01	0	preAnalysis	none	none	120 PMA	qt_5_3D9_man03	/Volumes/Promise RAID/Alf/for_Thea/experiments/quantification_test 5_3D9/3D9_5
234	239	12,452	120	PMA	414,415,415,416,416,417,417,418,418,417,417,415,415,413,413,411,411,410,410,407,407,406,406,403,403,402,402,401,401,400,400,401,401,402,402,403,403,404,404,406,406,408,408,414,	286,286,287,287,288,288,289,289,295,295,297,297,298,298,299,299,302,302,303,303,304,304,303,303,302,302,301,301,300,300,293,293,291,291,290,290,289,289,288,288,286,286,285,285,	/Volumes/Promise RAID 2/Alf/for_Thea/experiments/quantification_test 5_3D9/str_data/PMA/120/3D9_PMA_120image_hoescht179.TIF 3D9_PMA_120image_568178.tif	1750	12,452	0	preAnalysis	none	none	120 PMA	qt_5_3D9_man03	/Volumes/Promise RAID/Alf/for_Thea/experiments/quantification_test 5_3D9/3D9_5
235	180	13,956	120	PMA	261,264,264,265,265,266,266,265,265,264,264,263,263,261,261,259,259,256,256,255,255,254,254,253,253,252,252,253,253,254,254,255,255,256,256,258,258,261,	290,290,291,291,293,293,301,301,303,303,304,304,305,305,306,306,305,305,304,304,303,303,302,302,300,300,296,296,294,294,292,292,291,291,290,290,289,289,	/Volumes/Promise RAID 2/Alf/for_Thea/experiments/quantification_test 5_3D9/str_data/PMA/120/3D9_PMA_120image_hoescht179.TIF 3D9_PMA_120image_568178.tif	1750	13,956	0	preAnalysis	none	none	120 PMA	qt_5_3D9_man03	/Volumes/Promise RAID/Alf/for_Thea/experiments/quantification_test 5_3D9/3D9_5
236	189	11,598	120	PMA	207,210,210,211,211,216,216,217,217,218,218,219,219,218,218,217,217,216,216,209,209,207,207,205,205,204,204,203,203,202,202,203,203,204,204,206,206,207,	298,298,299,299,300,300,301,301,302,302,303,303,309,309,310,310,311,311,312,312,311,311,310,310,309,309,308,308,307,307,300,300,299,299,298,298,297,297,	/Volumes/Promise RAID 2/Alf/for_Thea/experiments/quantification_test 5_3D9/str_data/PMA/120/3D9_PMA_120image_hoescht179.TIF 3D9_PMA_120image_568178.tif	1750	11,598	0	preAnalysis	none	none	120 PMA	qt_5_3D9_man03	/Volumes/Promise RAID/Alf/for_Thea/experiments/quantification_test 5_3D9/3D9_5
237	214	14,131	120	PMA	440,442,442,443,443,444,444,445,445,444,444,443,443,442,442,435,435,434,434,432,432,431,431,430,430,431,431,432,432,433,433,434,434,440,	299,299,300,300,301,301,304,304,310,310,313,313,315,315,316,316,315,315,314,314,312,312,308,308,307,307,302,302,300,300,299,299,298,298,	/Volumes/Promise RAID 2/Alf/for_Thea/experiments/quantification_test 5_3D9/str_data/PMA/120/3D9_PMA_120image_hoescht179.TIF 3D9_PMA_120image_568178.tif	1750	14,131	0	preAnalysis	none	none	120 PMA	qt_5_3D9_man03	/Volumes/Promise RAID/Alf/for_Thea/experiments/quantification_test 5_3D9/3D9_5
238	189	11,429	120	PMA	176,178,178,179,179,180,180,181,181,182,182,183,183,182,182,180,180,175,175,173,173,172,172,171,171,170,170,169,169,168,168,167,167,166,166,167,167,168,168,170,170,176,	315,315,316,316,317,317,318,318,320,320,324,324,327,327,329,329,330,330,329,329,328,328,327,327,326,326,324,324,323,323,322,322,320,320,319,319,316,316,315,315,314,314,	/Volumes/Promise RAID 2/Alf/for_Thea/experiments/quantification_test 5_3D9/str_data/PMA/120/3D9_PMA_120image_hoescht179.TIF 3D9_PMA_120image_568178.tif	1750	11,429	0	preAnalysis	none	none	120 PMA	qt_5_3D9_man03	/Volumes/Promise RAID/Alf/for_Thea/experiments/quantification_test 5_3D9/3D9_5
239	341	11,496	120	PMA	1298,1300,1300,1301,1301,1302,1302,1301,1301,1300,1300,1299,1299,1298,1298,1297,1297,1295,1295,1283,1283,1282,1282,1281,1281,1280,1280,1279,1279,1278,1278,1279,1279,1281,1281,1282,1282,1284,1284,1288,1288,1290,1290,1291,1291,1293,1293,1295,1295,1298,	322,322,324,324,327,327,331,331,335,335,337,337,338,338,339,339,340,340,341,341,340,340,339,339,338,338,337,337,334,334,333,333,329,329,328,328,327,327,326,326,325,325,324,324,323,323,322,322,321,321,	/Volumes/Promise RAID 2/Alf/for_Thea/experiments/quantification_test 5_3D9/str_data/PMA/120/3D9_PMA_120image_hoescht179.TIF 3D9_PMA_120image_568178.tif	1750	11,496	0	preAnalysis	none	none	120 PMA	qt_5_3D9_man03	/Volumes/Promise RAID/Alf/for_Thea/experiments/quantification_test 5_3D9/3D9_5
240	305	13,22	120	PMA	883,887,887,888,888,889,889,890,890,891,891,890,890,889,889,888,888,887,887,885,885,880,880,873,873,872,872,871,871,870,870,869,869,870,870,871,871,872,872,873,873,874,874,876,876,883,	326,326,327,327,328,328,329,329,333,333,334,334,338,338,339,339,340,340,341,341,342,342,343,343,342,342,341,341,340,340,338,338,334,334,332,332,330,330,329,329,327,327,326,326,325,325,	/Volumes/Promise RAID 2/Alf/for_Thea/experiments/quantification_test 5_3D9/str_data/PMA/120/3D9_PMA_120image_hoescht179.TIF 3D9_PMA_120image_568178.tif	1750	13,22	0	preAnalysis	none	none	120 PMA	qt_5_3D9_man03	/Volumes/Promise RAID/Alf/for_Thea/experiments/quantification_test 5_3D9/3D9_5
241	158	15,494	120	PMA	228,232,232,233,233,234,234,235,235,234,234,233,233,231,231,228,228,225,225,222,222,221,221,220,220,221,221,222,222,223,223,224,224,227,227,228,	327,327,328,328,329,329,330,330,336,336,337,337,338,338,339,339,340,340,339,339,338,338,337,337,331,331,330,330,329,329,328,328,327,327,326,326,	/Volumes/Promise RAID 2/Alf/for_Thea/experiments/quantification_test 5_3D9/str_data/PMA/120/3D9_PMA_120image_hoescht179.TIF 3D9_PMA_120image_568178.tif	1750	15,494	0	preAnalysis	none	none	120 PMA	qt_5_3D9_man03	/Volumes/Promise RAID/Alf/for_Thea/experiments/quantification_test 5_3D9/3D9_5
242	264	15,42	120	PMA	684,685,685,687,687,688,688,689,689,688,688,687,687,686,686,684,684,681,681,674,674,673,673,671,671,670,670,671,671,672,672,674,674,675,675,677,677,679,679,684,	332,332,333,333,335,335,337,337,341,341,344,344,346,346,347,347,348,348,349,349,348,348,347,347,345,345,339,339,337,337,335,335,334,334,333,333,332,332,331,331,	/Volumes/Promise RAID 2/Alf/for_Thea/experiments/quantification_test 5_3D9/str_data/PMA/120/3D9_PMA_120image_hoescht179.TIF 3D9_PMA_120image_568178.tif	1750	15,42	0	preAnalysis	none	none	120 PMA	qt_5_3D9_man03	/Volumes/Promise RAID/Alf/for_Thea/experiments/quantification_test 5_3D9/3D9_5
243	270	13,57	120	PMA	720,721,721,722,722,723,723,722,722,721,721,719,719,718,718,716,716,709,709,706,706,705,705,704,704,703,703,704,704,705,705,706,706,708,708,711,711,712,712,720,	339,339,340,340,341,341,348,348,350,350,352,352,353,353,354,354,355,355,354,354,353,353,352,352,349,349,344,344,343,343,342,342,341,341,340,340,339,339,338,338,	/Volumes/Promise RAID 2/Alf/for_Thea/experiments/quantification_test 5_3D9/str_data/PMA/120/3D9_PMA_120image_hoescht179.TIF 3D9_PMA_120image_568178.tif	1750	13,57	0	preAnalysis	none	none	120 PMA	qt_5_3D9_man03	/Volumes/Promise RAID/Alf/for_Thea/experiments/quantification_test 5_3D9/3D9_5
244	271	14,937	120	PMA	977,979,979,980,980,981,981,982,982,983,983,982,982,981,981,980,980,979,979,976,976,971,971,969,969,968,968,967,967,966,966,965,965,966,966,967,967,968,968,970,970,971,971,977,	369,369,371,371,372,372,373,373,378,378,380,380,382,382,384,384,385,385,387,387,388,388,387,387,386,386,384,384,383,383,379,379,374,374,373,373,371,371,370,370,369,369,368,368,	/Volumes/Promise RAID 2/Alf/for_Thea/experiments/quantification_test 5_3D9/str_data/PMA/120/3D9_PMA_120image_hoescht179.TIF 3D9_PMA_120image_568178.tif	1750	14,937	0	preAnalysis	none	none	120 PMA	qt_5_3D9_man03	/Volumes/Promise RAID/Alf/for_Thea/experiments/quantification_test 5_3D9/3D9_5
245	322	14,161	120	PMA	1202,1204,1204,1205,1205,1207,1207,1208,1208,1209,1209,1208,1208,1207,1207,1206,1206,1205,1205,1204,1204,1202,1202,1199,1199,1194,1194,1192,1192,1190,1190,1189,1189,1188,1188,1189,1189,1190,1190,1191,1191,1192,1192,1193,1193,1194,1194,1195,1195,1198,1198,1202,	377,377,378,378,379,379,381,381,385,385,386,386,391,391,392,392,393,393,394,394,395,395,396,396,397,397,396,396,395,395,393,393,392,392,386,386,385,385,383,383,382,382,380,380,379,379,378,378,377,377,376,376,	/Volumes/Promise RAID 2/Alf/for_Thea/experiments/quantification_test 5_3D9/str_data/PMA/120/3D9_PMA_120image_hoescht179.TIF 3D9_PMA_120image_568178.tif	1750	14,161	0	preAnalysis	none	none	120 PMA	qt_5_3D9_man03	/Volumes/Promise RAID/Alf/for_Thea/experiments/quantification_test 5_3D9/3D9_5
246	408	26,098	120	PMA	35,39,39,41,41,43,43,45,45,46,46,45,45,44,44,43,43,42,42,41,41,39,39,38,38,35,35,32,32,31,31,30,30,29,29,28,28,27,27,25,25,24,24,23,23,22,22,23,23,25,25,26,26,29,29,30,30,34,34,35,	378,378,379,379,380,380,383,383,388,388,389,389,390,390,393,393,394,394,395,395,397,397,398,398,399,399,400,400,401,401,400,400,399,399,400,400,399,399,398,398,397,397,396,396,394,394,385,385,383,383,381,381,380,380,379,379,378,378,377,377,	/Volumes/Promise RAID 2/Alf/for_Thea/experiments/quantification_test 5_3D9/str_data/PMA/120/3D9_PMA_120image_hoescht179.TIF 3D9_PMA_120image_568178.tif	1750	26,098	0	preAnalysis	none	none	120 PMA	qt_5_3D9_man03	/Volumes/Promise RAID/Alf/for_Thea/experiments/quantification_test 5_3D9/3D9_5
247	257	13,821	120	PMA	726,727,727,728,728,731,731,733,733,734,734,735,735,734,734,733,733,732,732,729,729,723,723,721,721,720,720,719,719,718,718,717,717,718,718,719,719,720,720,721,721,725,725,726,	378,378,377,377,378,378,379,379,381,381,382,382,389,389,391,391,393,393,394,394,395,395,394,394,393,393,392,392,391,391,389,389,382,382,381,381,380,380,379,379,378,378,377,377,	/Volumes/Promise RAID 2/Alf/for_Thea/experiments/quantification_test 5_3D9/str_data/PMA/120/3D9_PMA_120image_hoescht179.TIF 3D9_PMA_120image_568178.tif	1750	13,821	0	preAnalysis	none	none	120 PMA	qt_5_3D9_man03	/Volumes/Promise RAID/Alf/for_Thea/experiments/quantification_test 5_3D9/3D9_5
248	252	11,302	120	PMA	489,493,493,494,494,495,495,496,496,497,497,496,496,495,495,494,494,493,493,489,489,482,482,480,480,479,479,478,478,477,477,478,478,480,480,482,482,486,486,489,	389,389,390,390,391,391,392,392,393,393,399,399,400,400,401,401,402,402,403,403,404,404,403,403,402,402,400,400,399,399,393,393,391,391,390,390,389,389,388,388,	/Volumes/Promise RAID 2/Alf/for_Thea/experiments/quantification_test 5_3D9/str_data/PMA/120/3D9_PMA_120image_hoescht179.TIF 3D9_PMA_120image_568178.tif	1750	11,302	0	preAnalysis	none	none	120 PMA	qt_5_3D9_man03	/Volumes/Promise RAID/Alf/for_Thea/experiments/quantification_test 5_3D9/3D9_5
249	209	12,172	120	PMA	259,262,262,267,267,268,268,271,271,272,272,273,273,272,272,268,268,267,267,258,258,255,255,253,253,252,252,251,251,252,252,253,253,254,254,256,256,259,	400,400,401,401,400,400,401,401,402,402,404,404,407,407,409,409,410,410,411,411,412,412,411,411,410,410,408,408,405,405,402,402,401,401,400,400,399,399,	/Volumes/Promise RAID 2/Alf/for_Thea/experiments/quantification_test 5_3D9/str_data/PMA/120/3D9_PMA_120image_hoescht179.TIF 3D9_PMA_120image_568178.tif	1750	12,172	0	preAnalysis	none	none	120 PMA	qt_5_3D9_man03	/Volumes/Promise RAID/Alf/for_Thea/experiments/quantification_test 5_3D9/3D9_5
250	308	16,058	120	PMA	1089,1092,1092,1093,1093,1094,1094,1095,1095,1096,1096,1097,1097,1096,1096,1095,1095,1094,1094,1091,1091,1085,1085,1082,1082,1080,1080,1078,1078,1077,1077,1076,1076,1077,1077,1078,1078,1079,1079,1081,1081,1083,1083,1086,1086,1089,	407,407,408,408,409,409,410,410,411,411,414,414,419,419,422,422,423,423,424,424,425,425,424,424,423,423,422,422,421,421,419,419,413,413,411,411,410,410,409,409,408,408,407,407,406,406,	/Volumes/Promise RAID 2/Alf/for_Thea/experiments/quantification_test 5_3D9/str_data/PMA/120/3D9_PMA_120image_hoescht179.TIF 3D9_PMA_120image_568178.tif	1750	16,058	0	preAnalysis	none	none	120 PMA	qt_5_3D9_man03	/Volumes/Promise RAID/Alf/for_Thea/experiments/quantification_test 5_3D9/3D9_5
251	319	13,392	120	PMA	1309,1311,1311,1313,1313,1314,1314,1315,1315,1316,1316,1317,1317,1316,1316,1315,1315,1314,1314,1312,1312,1311,1311,1310,1310,1308,1308,1301,1301,1299,1299,1298,1298,1297,1297,1296,1296,1295,1295,1296,1296,1297,1297,1298,1298,1299,1299,1300,1300,1301,1301,1303,1303,1305,1305,1308,1308,1309,	416,416,417,417,419,419,420,420,422,422,425,425,427,427,429,429,431,431,432,432,433,433,434,434,435,435,436,436,435,435,434,434,433,433,431,431,429,429,427,427,424,424,422,422,421,421,420,420,419,419,418,418,417,417,416,416,415,415,	/Volumes/Promise RAID 2/Alf/for_Thea/experiments/quantification_test 5_3D9/str_data/PMA/120/3D9_PMA_120image_hoescht179.TIF 3D9_PMA_120image_568178.tif	1750	13,392	0	preAnalysis	none	none	120 PMA	qt_5_3D9_man03	/Volumes/Promise RAID/Alf/for_Thea/experiments/quantification_test 5_3D9/3D9_5
252	269	14,989	120	PMA	623,625,625,626,626,627,627,628,628,627,627,626,626,624,624,617,617,615,615,614,614,613,613,612,612,611,611,610,610,611,611,612,612,614,614,616,616,623,	417,417,419,419,421,421,426,426,431,431,433,433,434,434,435,435,434,434,433,433,432,432,431,431,429,429,424,424,423,423,420,420,418,418,417,417,416,416,	/Volumes/Promise RAID 2/Alf/for_Thea/experiments/quantification_test 5_3D9/str_data/PMA/120/3D9_PMA_120image_hoescht179.TIF 3D9_PMA_120image_568178.tif	1750	14,989	0	preAnalysis	none	none	120 PMA	qt_5_3D9_man03	/Volumes/Promise RAID/Alf/for_Thea/experiments/quantification_test 5_3D9/3D9_5
253	261	14,801	120	PMA	1046,1048,1048,1049,1049,1050,1050,1051,1051,1050,1050,1049,1049,1048,1048,1047,1047,1045,1045,1040,1040,1038,1038,1036,1036,1035,1035,1034,1034,1035,1035,1036,1036,1037,1037,1039,1039,1046,	432,432,433,433,434,434,438,438,441,441,445,445,446,446,448,448,449,449,450,450,449,449,448,448,447,447,445,445,436,436,434,434,433,433,432,432,431,431,	/Volumes/Promise RAID 2/Alf/for_Thea/experiments/quantification_test 5_3D9/str_data/PMA/120/3D9_PMA_120image_hoescht179.TIF 3D9_PMA_120image_568178.tif	1750	14,801	0	preAnalysis	none	none	120 PMA	qt_5_3D9_man03	/Volumes/Promise RAID/Alf/for_Thea/experiments/quantification_test 5_3D9/3D9_5
254	210	10,667	120	PMA	278,281,281,283,283,284,284,285,285,284,284,283,283,282,282,281,281,280,280,277,277,274,274,271,271,270,270,269,269,268,268,267,267,268,268,269,269,271,271,277,277,278,	436,436,437,437,439,439,442,442,444,444,446,446,447,447,448,448,449,449,450,450,451,451,450,450,449,449,448,448,447,447,445,445,440,440,438,438,437,437,436,436,435,435,	/Volumes/Promise RAID 2/Alf/for_Thea/experiments/quantification_test 5_3D9/str_data/PMA/120/3D9_PMA_120image_hoescht179.TIF 3D9_PMA_120image_568178.tif	1750	10,667	0	preAnalysis	none	none	120 PMA	qt_5_3D9_man03	/Volumes/Promise RAID/Alf/for_Thea/experiments/quantification_test 5_3D9/3D9_5
255	220	15,491	120	PMA	473,475,475,476,476,477,477,476,476,475,475,474,474,473,473,471,471,466,466,464,464,463,463,462,462,461,461,462,462,463,463,464,464,466,466,473,	437,437,438,438,439,439,447,447,449,449,450,450,451,451,452,452,453,453,452,452,451,451,449,449,445,445,441,441,439,439,438,438,437,437,436,436,	/Volumes/Promise RAID 2/Alf/for_Thea/experiments/quantification_test 5_3D9/str_data/PMA/120/3D9_PMA_120image_hoescht179.TIF 3D9_PMA_120image_568178.tif	1750	15,491	0	preAnalysis	none	none	120 PMA	qt_5_3D9_man03	/Volumes/Promise RAID/Alf/for_Thea/experiments/quantification_test 5_3D9/3D9_5
256	327	14,287	120	PMA	1083,1086,1086,1088,1088,1089,1089,1091,1091,1092,1092,1093,1093,1094,1094,1093,1093,1092,1092,1091,1091,1090,1090,1086,1086,1085,1085,1083,1083,1081,1081,1080,1080,1079,1079,1078,1078,1076,1076,1075,1075,1074,1074,1073,1073,1072,1072,1073,1073,1074,1074,1075,1075,1076,1076,1077,1077,1080,1080,1083,	474,474,475,475,476,476,477,477,479,479,481,481,484,484,486,486,490,490,491,491,493,493,494,494,495,495,494,494,493,493,492,492,491,491,490,490,489,489,488,488,487,487,485,485,484,484,480,480,478,478,477,477,476,476,475,475,474,474,473,473,	/Volumes/Promise RAID 2/Alf/for_Thea/experiments/quantification_test 5_3D9/str_data/PMA/120/3D9_PMA_120image_hoescht179.TIF 3D9_PMA_120image_568178.tif	1750	14,287	0	preAnalysis	none	none	120 PMA	qt_5_3D9_man03	/Volumes/Promise RAID/Alf/for_Thea/experiments/quantification_test 5_3D9/3D9_5
257	309	14,706	120	PMA	829,831,831,833,833,834,834,835,835,836,836,837,837,836,836,837,837,836,836,835,835,834,834,832,832,825,825,823,823,820,820,819,819,818,818,817,817,816,816,817,817,818,818,819,819,821,821,823,823,829,	477,477,478,478,479,479,480,480,481,481,486,486,487,487,488,488,489,489,491,491,493,493,494,494,495,495,494,494,493,493,492,492,491,491,490,490,488,488,483,483,480,480,479,479,478,478,477,477,476,476,	/Volumes/Promise RAID 2/Alf/for_Thea/experiments/quantification_test 5_3D9/str_data/PMA/120/3D9_PMA_120image_hoescht179.TIF 3D9_PMA_120image_568178.tif	1750	14,706	0	preAnalysis	none	none	120 PMA	qt_5_3D9_man03	/Volumes/Promise RAID/Alf/for_Thea/experiments/quantification_test 5_3D9/3D9_5
258	188	14,457	120	PMA	304,307,307,308,308,309,309,311,311,312,312,313,313,312,312,311,311,310,310,308,308,303,303,301,301,300,300,298,298,297,297,298,298,299,299,300,300,303,303,304,	489,489,490,490,491,491,492,492,493,493,496,496,499,499,501,501,502,502,503,503,504,504,503,503,502,502,501,501,499,499,492,492,491,491,490,490,489,489,488,488,	/Volumes/Promise RAID 2/Alf/for_Thea/experiments/quantification_test 5_3D9/str_data/PMA/120/3D9_PMA_120image_hoescht179.TIF 3D9_PMA_120image_568178.tif	1750	14,457	0	preAnalysis	none	none	120 PMA	qt_5_3D9_man03	/Volumes/Promise RAID/Alf/for_Thea/experiments/quantification_test 5_3D9/3D9_5
259	159	12,176	120	PMA	86,88,88,90,90,91,91,90,90,89,89,86,86,85,85,84,84,79,79,78,78,77,77,76,76,77,77,78,78,80,80,86,	491,491,492,492,494,494,497,497,499,499,500,500,502,502,503,503,504,504,503,503,502,502,501,501,494,494,492,492,491,491,490,490,	/Volumes/Promise RAID 2/Alf/for_Thea/experiments/quantification_test 5_3D9/str_data/PMA/120/3D9_PMA_120image_hoescht179.TIF 3D9_PMA_120image_568178.tif	1750	12,176	0	preAnalysis	none	none	120 PMA	qt_5_3D9_man03	/Volumes/Promise RAID/Alf/for_Thea/experiments/quantification_test 5_3D9/3D9_5
260	281	13,893	120	PMA	801,803,803,805,805,806,806,807,807,808,808,809,809,808,808,809,809,808,808,807,807,806,806,804,804,797,797,795,795,794,794,793,793,792,792,791,791,790,790,791,791,792,792,793,793,794,794,796,796,800,800,801,	496,496,497,497,498,498,500,500,501,501,504,504,506,506,507,507,508,508,510,510,512,512,514,514,515,515,514,514,513,513,512,512,511,511,509,509,507,507,502,502,500,500,499,499,498,498,497,497,496,496,495,495,	/Volumes/Promise RAID 2/Alf/for_Thea/experiments/quantification_test 5_3D9/str_data/PMA/120/3D9_PMA_120image_hoescht179.TIF 3D9_PMA_120image_568178.tif	1750	13,893	0	preAnalysis	none	none	120 PMA	qt_5_3D9_man03	/Volumes/Promise RAID/Alf/for_Thea/experiments/quantification_test 5_3D9/3D9_5
261	304	14,579	120	PMA	1203,1206,1206,1207,1207,1208,1208,1209,1209,1208,1208,1207,1207,1205,1205,1204,1204,1194,1194,1192,1192,1191,1191,1190,1190,1189,1189,1188,1188,1189,1189,1190,1190,1191,1191,1192,1192,1193,1193,1194,1194,1196,1196,1199,1199,1203,	501,501,502,502,504,504,508,508,512,512,515,515,517,517,518,518,519,519,518,518,517,517,516,516,514,514,512,512,510,510,508,508,506,506,505,505,504,504,503,503,502,502,501,501,500,500,	/Volumes/Promise RAID 2/Alf/for_Thea/experiments/quantification_test 5_3D9/str_data/PMA/120/3D9_PMA_120image_hoescht179.TIF 3D9_PMA_120image_568178.tif	1750	14,579	0	preAnalysis	none	none	120 PMA	qt_5_3D9_man03	/Volumes/Promise RAID/Alf/for_Thea/experiments/quantification_test 5_3D9/3D9_5
262	254	14,236	120	PMA	549,551,551,557,557,559,559,560,560,561,561,560,560,559,559,558,558,556,556,554,554,551,551,550,550,545,545,544,544,543,543,542,542,541,541,540,540,541,541,542,542,543,543,545,545,549,	576,576,577,577,578,578,579,579,582,582,585,585,587,587,588,588,589,589,590,590,591,591,592,592,591,591,590,590,589,589,587,587,586,586,584,584,582,582,578,578,577,577,576,576,575,575,	/Volumes/Promise RAID 2/Alf/for_Thea/experiments/quantification_test 5_3D9/str_data/PMA/120/3D9_PMA_120image_hoescht179.TIF 3D9_PMA_120image_568178.tif	1750	14,236	0	preAnalysis	none	none	120 PMA	qt_5_3D9_man03	/Volumes/Promise RAID/Alf/for_Thea/experiments/quantification_test 5_3D9/3D9_5
263	219	11,178	120	PMA	287,288,288,289,289,290,290,296,296,297,297,298,298,297,297,296,296,295,295,294,294,292,292,284,284,283,283,282,282,281,281,280,280,279,279,280,280,281,281,282,282,287,	590,590,591,591,592,592,593,593,594,594,595,595,600,600,601,601,602,602,603,603,604,604,605,605,604,604,603,603,602,602,601,601,598,598,596,596,592,592,590,590,589,589,	/Volumes/Promise RAID 2/Alf/for_Thea/experiments/quantification_test 5_3D9/str_data/PMA/120/3D9_PMA_120image_hoescht179.TIF 3D9_PMA_120image_568178.tif	1750	11,178	0	preAnalysis	none	none	120 PMA	qt_5_3D9_man03	/Volumes/Promise RAID/Alf/for_Thea/experiments/quantification_test 5_3D9/3D9_5
264	331	14,211	120	PMA	1220,1223,1223,1224,1224,1225,1225,1226,1226,1227,1227,1228,1228,1227,1227,1226,1226,1225,1225,1224,1224,1223,1223,1222,1222,1214,1214,1213,1213,1212,1212,1211,1211,1210,1210,1209,1209,1210,1210,1211,1211,1212,1212,1213,1213,1214,1214,1216,1216,1219,1219,1220,	590,590,591,591,592,592,593,593,594,594,597,597,604,604,606,606,608,608,609,609,610,610,611,611,612,612,611,611,610,610,609,609,608,608,607,607,601,601,598,598,595,595,594,594,592,592,591,591,590,590,589,589,	/Volumes/Promise RAID 2/Alf/for_Thea/experiments/quantification_test 5_3D9/str_data/PMA/120/3D9_PMA_120image_hoescht179.TIF 3D9_PMA_120image_568178.tif	1750	14,211	0	preAnalysis	none	none	120 PMA	qt_5_3D9_man03	/Volumes/Promise RAID/Alf/for_Thea/experiments/quantification_test 5_3D9/3D9_5
265	180	15,111	120	PMA	489,491,491,492,492,493,493,494,494,495,495,496,496,495,495,494,494,487,487,486,486,485,485,484,484,483,483,482,482,483,483,484,484,486,486,489,	610,610,611,611,612,612,613,613,615,615,617,617,623,623,625,625,626,626,625,625,623,623,622,622,621,621,618,618,613,613,611,611,610,610,609,609,	/Volumes/Promise RAID 2/Alf/for_Thea/experiments/quantification_test 5_3D9/str_data/PMA/120/3D9_PMA_120image_hoescht179.TIF 3D9_PMA_120image_568178.tif	1750	15,111	0	preAnalysis	none	none	120 PMA	qt_5_3D9_man03	/Volumes/Promise RAID/Alf/for_Thea/experiments/quantification_test 5_3D9/3D9_5
266	209	12,708	120	PMA	374,375,375,376,376,377,377,378,378,377,377,376,376,375,375,374,374,372,372,367,367,365,365,364,364,363,363,362,362,363,363,364,364,366,366,374,	624,624,625,625,626,626,627,627,633,633,635,635,636,636,637,637,638,638,639,639,638,638,637,637,636,636,634,634,627,627,625,625,624,624,623,623,	/Volumes/Promise RAID 2/Alf/for_Thea/experiments/quantification_test 5_3D9/str_data/PMA/120/3D9_PMA_120image_hoescht179.TIF 3D9_PMA_120image_568178.tif	1750	12,708	0	preAnalysis	none	none	120 PMA	qt_5_3D9_man03	/Volumes/Promise RAID/Alf/for_Thea/experiments/quantification_test 5_3D9/3D9_5
267	330	12,897	120	PMA	1344,1349,1349,1351,1351,1352,1352,1353,1353,1352,1352,1351,1351,1350,1350,1349,1349,1347,1347,1337,1337,1334,1334,1333,1333,1332,1332,1331,1331,1330,1330,1329,1329,1330,1330,1331,1331,1332,1332,1333,1333,1335,1335,1344,	645,645,646,646,648,648,650,650,653,653,656,656,658,658,659,659,660,660,661,661,660,660,659,659,658,658,657,657,656,656,655,655,649,649,648,648,647,647,646,646,645,645,644,644,	/Volumes/Promise RAID 2/Alf/for_Thea/experiments/quantification_test 5_3D9/str_data/PMA/120/3D9_PMA_120image_hoescht179.TIF 3D9_PMA_120image_568178.tif	1750	12,897	0	preAnalysis	none	none	120 PMA	qt_5_3D9_man03	/Volumes/Promise RAID/Alf/for_Thea/experiments/quantification_test 5_3D9/3D9_5
268	259	14,023	120	PMA	682,685,685,686,686,687,687,688,688,689,689,690,690,691,691,690,690,689,689,688,688,686,686,680,680,677,677,676,676,675,675,674,674,673,673,674,674,675,675,676,676,678,678,681,681,682,	656,656,657,657,658,658,659,659,660,660,662,662,663,663,670,670,671,671,672,672,673,673,674,674,673,673,672,672,671,671,670,670,668,668,662,662,660,660,658,658,657,657,656,656,655,655,	/Volumes/Promise RAID 2/Alf/for_Thea/experiments/quantification_test 5_3D9/str_data/PMA/120/3D9_PMA_120image_hoescht179.TIF 3D9_PMA_120image_568178.tif	1750	14,023	0	preAnalysis	none	none	120 PMA	qt_5_3D9_man03	/Volumes/Promise RAID/Alf/for_Thea/experiments/quantification_test 5_3D9/3D9_5
269	280	14,768	120	PMA	825,826,826,828,828,829,829,830,830,829,829,828,828,827,827,826,826,824,824,822,822,818,818,816,816,814,814,813,813,812,812,811,811,812,812,813,813,814,814,815,815,816,816,818,818,825,	682,682,683,683,684,684,687,687,693,693,695,695,696,696,697,697,698,698,699,699,700,700,699,699,698,698,697,697,696,696,694,694,688,688,686,686,685,685,684,684,683,683,682,682,681,681,	/Volumes/Promise RAID 2/Alf/for_Thea/experiments/quantification_test 5_3D9/str_data/PMA/120/3D9_PMA_120image_hoescht179.TIF 3D9_PMA_120image_568178.tif	1750	14,768	0	preAnalysis	none	none	120 PMA	qt_5_3D9_man03	/Volumes/Promise RAID/Alf/for_Thea/experiments/quantification_test 5_3D9/3D9_5
270	282	13,901	120	PMA	773,774,774,776,776,777,777,778,778,777,777,776,776,774,774,773,773,765,765,763,763,762,762,761,761,760,760,761,761,762,762,763,763,765,765,767,767,773,	697,697,698,698,699,699,702,702,709,709,711,711,713,713,714,714,715,715,714,714,713,713,711,711,710,710,701,701,700,700,699,699,698,698,697,697,696,696,	/Volumes/Promise RAID 2/Alf/for_Thea/experiments/quantification_test 5_3D9/str_data/PMA/120/3D9_PMA_120image_hoescht179.TIF 3D9_PMA_120image_568178.tif	1750	13,901	0	preAnalysis	none	none	120 PMA	qt_5_3D9_man03	/Volumes/Promise RAID/Alf/for_Thea/experiments/quantification_test 5_3D9/3D9_5
271	266	14,436	120	PMA	658,660,660,661,661,662,662,663,663,662,662,661,661,660,660,658,658,654,654,652,652,650,650,649,649,648,648,647,647,648,648,649,649,650,650,651,651,652,652,654,654,658,	706,706,708,708,709,709,710,710,721,721,723,723,724,724,726,726,727,727,726,726,725,725,723,723,721,721,717,717,716,716,712,712,711,711,708,708,707,707,706,706,705,705,	/Volumes/Promise RAID 2/Alf/for_Thea/experiments/quantification_test 5_3D9/str_data/PMA/120/3D9_PMA_120image_hoescht179.TIF 3D9_PMA_120image_568178.tif	1750	14,436	0	preAnalysis	none	none	120 PMA	qt_5_3D9_man03	/Volumes/Promise RAID/Alf/for_Thea/experiments/quantification_test 5_3D9/3D9_5
272	209	13,933	120	PMA	300,302,302,303,303,302,302,304,304,305,305,304,304,303,303,302,302,301,301,297,297,294,294,292,292,291,291,290,290,291,291,292,292,293,293,294,294,298,298,300,	723,723,724,724,729,729,732,732,734,734,736,736,738,738,739,739,740,740,741,741,740,740,739,739,737,737,734,734,727,727,726,726,725,725,724,724,723,723,722,722,	/Volumes/Promise RAID 2/Alf/for_Thea/experiments/quantification_test 5_3D9/str_data/PMA/120/3D9_PMA_120image_hoescht179.TIF 3D9_PMA_120image_568178.tif	1750	13,933	0	preAnalysis	none	none	120 PMA	qt_5_3D9_man03	/Volumes/Promise RAID/Alf/for_Thea/experiments/quantification_test 5_3D9/3D9_5
273	175	6,949	120	PMA	115,117,117,118,118,119,119,120,120,119,119,118,118,117,117,116,116,114,114,112,112,109,109,108,108,107,107,106,106,105,105,106,106,107,107,108,108,110,110,115,	735,735,736,736,737,737,739,739,741,741,746,746,747,747,748,748,749,749,750,750,749,749,748,748,746,746,745,745,743,743,739,739,737,737,736,736,735,735,734,734,	/Volumes/Promise RAID 2/Alf/for_Thea/experiments/quantification_test 5_3D9/str_data/PMA/120/3D9_PMA_120image_hoescht179.TIF 3D9_PMA_120image_568178.tif	1750	6,949	0	preAnalysis	none	none	120 PMA	qt_5_3D9_man03	/Volumes/Promise RAID/Alf/for_Thea/experiments/quantification_test 5_3D9/3D9_5
274	298	14,497	120	PMA	833,834,834,835,835,836,836,837,837,838,838,837,837,836,836,834,834,833,833,825,825,823,823,821,821,820,820,819,819,818,818,819,819,820,820,821,821,822,822,823,823,825,825,833,	749,749,750,750,751,751,753,753,756,756,759,759,763,763,765,765,766,766,767,767,766,766,765,765,764,764,763,763,760,760,757,757,754,754,752,752,751,751,750,750,749,749,748,748,	/Volumes/Promise RAID 2/Alf/for_Thea/experiments/quantification_test 5_3D9/str_data/PMA/120/3D9_PMA_120image_hoescht179.TIF 3D9_PMA_120image_568178.tif	1750	14,497	0	preAnalysis	none	none	120 PMA	qt_5_3D9_man03	/Volumes/Promise RAID/Alf/for_Thea/experiments/quantification_test 5_3D9/3D9_5
275	281	14,463	120	PMA	871,872,872,873,873,874,874,875,875,876,876,877,877,876,876,875,875,874,874,873,873,871,871,864,864,862,862,861,861,860,860,859,859,858,858,859,859,860,860,861,861,862,862,863,863,871,	753,753,754,754,755,755,756,756,759,759,763,763,764,764,767,767,768,768,769,769,770,770,771,771,770,770,769,769,768,768,767,767,765,765,759,759,756,756,755,755,754,754,753,753,752,752,	/Volumes/Promise RAID 2/Alf/for_Thea/experiments/quantification_test 5_3D9/str_data/PMA/120/3D9_PMA_120image_hoescht179.TIF 3D9_PMA_120image_568178.tif	1750	14,463	0	preAnalysis	none	none	120 PMA	qt_5_3D9_man03	/Volumes/Promise RAID/Alf/for_Thea/experiments/quantification_test 5_3D9/3D9_5
276	321	15,452	120	PMA	1034,1037,1037,1041,1041,1043,1043,1044,1044,1045,1045,1046,1046,1045,1045,1044,1044,1043,1043,1042,1042,1041,1041,1040,1040,1030,1030,1028,1028,1026,1026,1025,1025,1024,1024,1023,1023,1024,1024,1025,1025,1026,1026,1027,1027,1034,	766,766,767,767,768,768,769,769,770,770,774,774,776,776,778,778,779,779,780,780,781,781,782,782,783,783,782,782,780,780,779,779,777,777,775,775,769,769,768,768,767,767,766,766,765,765,	/Volumes/Promise RAID 2/Alf/for_Thea/experiments/quantification_test 5_3D9/str_data/PMA/120/3D9_PMA_120image_hoescht179.TIF 3D9_PMA_120image_568178.tif	1750	15,452	0	preAnalysis	none	none	120 PMA	qt_5_3D9_man03	/Volumes/Promise RAID/Alf/for_Thea/experiments/quantification_test 5_3D9/3D9_5
277	276	16,504	120	PMA	712,716,716,717,717,718,718,719,719,720,720,721,721,720,720,719,719,717,717,716,716,715,715,714,714,713,713,707,707,706,706,704,704,703,703,702,702,701,701,702,702,703,703,705,705,706,706,708,708,711,711,712,	810,810,811,811,812,812,813,813,814,814,817,817,819,819,823,823,825,825,826,826,827,827,828,828,827,827,828,828,827,827,826,826,825,825,823,823,821,821,819,819,815,815,813,813,812,812,811,811,810,810,809,809,	/Volumes/Promise RAID 2/Alf/for_Thea/experiments/quantification_test 5_3D9/str_data/PMA/120/3D9_PMA_120image_hoescht179.TIF 3D9_PMA_120image_568178.tif	1750	16,504	0	preAnalysis	none	none	120 PMA	qt_5_3D9_man03	/Volumes/Promise RAID/Alf/for_Thea/experiments/quantification_test 5_3D9/3D9_5
278	833	66,305	120	PMA	982,985,985,987,987,988,988,989,989,990,990,991,991,992,992,993,993,992,992,991,991,990,990,989,989,988,988,987,987,982,982,981,981,977,977,975,975,974,974,973,973,971,971,970,970,969,969,965,965,962,962,961,961,960,960,959,959,958,958,959,959,960,960,961,961,962,962,969,969,970,970,971,971,972,972,974,974,977,977,982,	815,815,816,816,817,817,818,818,819,819,820,820,822,822,825,825,838,838,840,840,842,842,843,843,844,844,845,845,846,846,847,847,846,846,845,845,844,844,843,843,842,842,841,841,840,840,839,839,838,838,837,837,835,835,834,834,832,832,825,825,823,823,822,822,821,821,820,820,819,819,818,818,817,817,816,816,815,815,814,814,	/Volumes/Promise RAID 2/Alf/for_Thea/experiments/quantification_test 5_3D9/str_data/PMA/120/3D9_PMA_120image_hoescht179.TIF 3D9_PMA_120image_568178.tif	1750	66,305	0	preAnalysis	none	none	120 PMA	qt_5_3D9_man03	/Volumes/Promise RAID/Alf/for_Thea/experiments/quantification_test 5_3D9/3D9_5
279	304	14,632	120	PMA	1177,1179,1179,1180,1180,1181,1181,1182,1182,1183,1183,1184,1184,1183,1183,1182,1182,1181,1181,1179,1179,1177,1177,1175,1175,1174,1174,1173,1173,1171,1171,1169,1169,1168,1168,1167,1167,1166,1166,1165,1165,1164,1164,1165,1165,1166,1166,1167,1167,1169,1169,1177,	839,839,840,840,841,841,842,842,843,843,845,845,851,851,854,854,855,855,856,856,857,857,858,858,857,857,858,858,857,857,856,856,855,855,853,853,852,852,850,850,847,847,844,844,841,841,840,840,839,839,838,838,	/Volumes/Promise RAID 2/Alf/for_Thea/experiments/quantification_test 5_3D9/str_data/PMA/120/3D9_PMA_120image_hoescht179.TIF 3D9_PMA_120image_568178.tif	1750	14,632	0	preAnalysis	none	none	120 PMA	qt_5_3D9_man03	/Volumes/Promise RAID/Alf/for_Thea/experiments/quantification_test 5_3D9/3D9_5
280	258	10,605	120	PMA	517,522,522,523,523,524,524,523,523,522,522,521,521,520,520,519,519,518,518,516,516,515,515,512,512,509,509,508,508,507,507,506,506,507,507,508,508,507,507,508,508,509,509,510,510,512,512,514,514,517,	848,848,849,849,850,850,857,857,858,858,860,860,861,861,862,862,863,863,865,865,866,866,867,867,866,866,865,865,864,864,863,863,859,859,856,856,855,855,854,854,852,852,850,850,849,849,848,848,847,847,	/Volumes/Promise RAID 2/Alf/for_Thea/experiments/quantification_test 5_3D9/str_data/PMA/120/3D9_PMA_120image_hoescht179.TIF 3D9_PMA_120image_568178.tif	1750	10,605	0	preAnalysis	none	none	120 PMA	qt_5_3D9_man03	/Volumes/Promise RAID/Alf/for_Thea/experiments/quantification_test 5_3D9/3D9_5
281	162	10,568	120	PMA	246,248,248,249,249,250,250,249,249,248,248,246,246,243,243,241,241,240,240,239,239,238,238,237,237,238,238,239,239,240,240,242,242,246,	851,851,852,852,855,855,862,862,863,863,865,865,866,866,865,865,864,864,863,863,862,862,860,860,854,854,853,853,852,852,851,851,850,850,	/Volumes/Promise RAID 2/Alf/for_Thea/experiments/quantification_test 5_3D9/str_data/PMA/120/3D9_PMA_120image_hoescht179.TIF 3D9_PMA_120image_568178.tif	1750	10,568	0	preAnalysis	none	none	120 PMA	qt_5_3D9_man03	/Volumes/Promise RAID/Alf/for_Thea/experiments/quantification_test 5_3D9/3D9_5
282	277	15,422	120	PMA	1056,1058,1058,1059,1059,1060,1060,1061,1061,1062,1062,1063,1063,1064,1064,1063,1063,1062,1062,1061,1061,1060,1060,1055,1055,1052,1052,1051,1051,1050,1050,1049,1049,1048,1048,1047,1047,1046,1046,1045,1045,1046,1046,1047,1047,1048,1048,1049,1049,1056,	858,858,859,859,861,861,862,862,864,864,865,865,866,866,873,873,874,874,875,875,876,876,877,877,876,876,875,875,874,874,873,873,872,872,871,871,869,869,866,866,864,864,861,861,859,859,858,858,857,857,	/Volumes/Promise RAID 2/Alf/for_Thea/experiments/quantification_test 5_3D9/str_data/PMA/120/3D9_PMA_120image_hoescht179.TIF 3D9_PMA_120image_568178.tif	1750	15,422	0	preAnalysis	none	none	120 PMA	qt_5_3D9_man03	/Volumes/Promise RAID/Alf/for_Thea/experiments/quantification_test 5_3D9/3D9_5
283	202	12,832	120	PMA	330,332,332,333,333,334,334,333,333,332,332,331,331,330,330,329,329,328,328,327,327,325,325,323,323,321,321,320,320,321,321,322,322,323,323,324,324,325,325,326,326,328,328,330,	860,860,861,861,863,863,871,871,873,873,874,874,875,875,876,876,877,877,878,878,879,879,880,880,879,879,878,878,870,870,869,869,866,866,865,865,863,863,861,861,860,860,859,859,	/Volumes/Promise RAID 2/Alf/for_Thea/experiments/quantification_test 5_3D9/str_data/PMA/120/3D9_PMA_120image_hoescht179.TIF 3D9_PMA_120image_568178.tif	1750	12,832	0	preAnalysis	none	none	120 PMA	qt_5_3D9_man03	/Volumes/Promise RAID/Alf/for_Thea/experiments/quantification_test 5_3D9/3D9_5
284	297	13,522	120	PMA	784,787,787,788,788,789,789,790,790,789,789,788,788,787,787,786,786,785,785,784,784,783,783,782,782,781,781,777,777,776,776,775,775,774,774,773,773,772,772,771,771,772,772,773,773,774,774,775,775,778,778,784,	882,882,884,884,885,885,888,888,889,889,891,891,893,893,894,894,896,896,898,898,899,899,900,900,901,901,902,902,903,903,902,902,901,901,900,900,899,899,898,898,887,887,886,886,884,884,883,883,882,882,881,881,	/Volumes/Promise RAID 2/Alf/for_Thea/experiments/quantification_test 5_3D9/str_data/PMA/120/3D9_PMA_120image_hoescht179.TIF 3D9_PMA_120image_568178.tif	1750	13,522	0	preAnalysis	none	none	120 PMA	qt_5_3D9_man03	/Volumes/Promise RAID/Alf/for_Thea/experiments/quantification_test 5_3D9/3D9_5
285	266	17,778	120	PMA	1297,1298,1298,1300,1300,1301,1301,1302,1302,1303,1303,1304,1304,1303,1303,1302,1302,1301,1301,1300,1300,1299,1299,1297,1297,1292,1292,1290,1290,1288,1288,1287,1287,1286,1286,1285,1285,1286,1286,1287,1287,1289,1289,1297,	913,913,914,914,915,915,916,916,917,917,919,919,923,923,925,925,926,926,927,927,928,928,929,929,930,930,929,929,928,928,926,926,925,925,924,924,916,916,914,914,913,913,912,912,	/Volumes/Promise RAID 2/Alf/for_Thea/experiments/quantification_test 5_3D9/str_data/PMA/120/3D9_PMA_120image_hoescht179.TIF 3D9_PMA_120image_568178.tif	1750	17,778	0	preAnalysis	none	none	120 PMA	qt_5_3D9_man03	/Volumes/Promise RAID/Alf/for_Thea/experiments/quantification_test 5_3D9/3D9_5
286	247	11,595	120	PMA	198,199,199,200,200,201,201,200,200,199,199,198,198,197,197,194,194,191,191,190,190,189,189,188,188,187,187,186,186,187,187,188,188,198,	915,915,921,921,924,924,926,926,931,931,932,932,933,933,934,934,935,935,934,934,933,933,930,930,928,928,925,925,917,917,915,915,914,914,	/Volumes/Promise RAID 2/Alf/for_Thea/experiments/quantification_test 5_3D9/str_data/PMA/120/3D9_PMA_120image_hoescht179.TIF 3D9_PMA_120image_568178.tif	1750	11,595	0	preAnalysis	none	none	120 PMA	qt_5_3D9_man03	/Volumes/Promise RAID/Alf/for_Thea/experiments/quantification_test 5_3D9/3D9_5
287	320	15,444	120	PMA	1029,1032,1032,1035,1035,1036,1036,1038,1038,1039,1039,1040,1040,1041,1041,1040,1040,1039,1039,1038,1038,1037,1037,1036,1036,1035,1035,1033,1033,1026,1026,1025,1025,1024,1024,1023,1023,1022,1022,1023,1023,1024,1024,1025,1025,1027,1027,1029,	917,917,918,918,919,919,920,920,922,922,923,923,924,924,930,930,931,931,933,933,934,934,935,935,936,936,937,937,938,938,937,937,936,936,934,934,930,930,920,920,919,919,918,918,917,917,916,916,	/Volumes/Promise RAID 2/Alf/for_Thea/experiments/quantification_test 5_3D9/str_data/PMA/120/3D9_PMA_120image_hoescht179.TIF 3D9_PMA_120image_568178.tif	1750	15,444	0	preAnalysis	none	none	120 PMA	qt_5_3D9_man03	/Volumes/Promise RAID/Alf/for_Thea/experiments/quantification_test 5_3D9/3D9_5
288	275	14,138	120	PMA	762,765,765,766,766,767,767,768,768,767,767,766,766,765,765,764,764,763,763,762,762,757,757,755,755,754,754,753,753,752,752,751,751,752,752,753,753,754,754,755,755,756,756,762,	929,929,930,930,932,932,933,933,942,942,945,945,946,946,947,947,948,948,947,947,948,948,947,947,946,946,945,945,943,943,940,940,935,935,933,933,931,931,930,930,929,929,928,928,	/Volumes/Promise RAID 2/Alf/for_Thea/experiments/quantification_test 5_3D9/str_data/PMA/120/3D9_PMA_120image_hoescht179.TIF 3D9_PMA_120image_568178.tif	1750	14,138	0	preAnalysis	none	none	120 PMA	qt_5_3D9_man03	/Volumes/Promise RAID/Alf/for_Thea/experiments/quantification_test 5_3D9/3D9_5
289	171	42,205	120	PMA	1011,1012,1012,1013,1013,1014,1014,1013,1013,1014,1014,1016,1016,1018,1018,1022,1022,1021,1021,1018,1018,1017,1017,1015,1015,1013,1013,1011,1011,1010,1010,1006,1006,1003,1003,1001,1001,999,999,998,998,1001,1001,1002,1002,1003,1003,1004,1004,1011,	940,940,941,941,943,943,944,944,945,945,947,947,946,946,945,945,947,947,948,948,947,947,948,948,949,949,950,950,949,949,950,950,952,952,951,951,950,950,947,947,944,944,943,943,942,942,941,941,938,938,	/Volumes/Promise RAID 2/Alf/for_Thea/experiments/quantification_test 5_3D9/str_data/PMA/120/3D9_PMA_120image_hoescht179.TIF 3D9_PMA_120image_568178.tif	1750	42,205	0	preAnalysis	none	none	120 PMA	qt_5_3D9_man03	/Volumes/Promise RAID/Alf/for_Thea/experiments/quantification_test 5_3D9/3D9_5
290	289	15,557	120	PMA	925,927,927,928,928,929,929,930,930,931,931,932,932,933,933,931,931,930,930,929,929,920,920,918,918,917,917,916,916,915,915,914,914,915,915,916,916,917,917,918,918,925,	940,940,941,941,942,942,943,943,944,944,945,945,947,947,955,955,956,956,957,957,958,958,957,957,956,956,955,955,953,953,951,951,946,946,943,943,941,941,940,940,939,939,	/Volumes/Promise RAID 2/Alf/for_Thea/experiments/quantification_test 5_3D9/str_data/PMA/120/3D9_PMA_120image_hoescht179.TIF 3D9_PMA_120image_568178.tif	1750	15,557	0	preAnalysis	none	none	120 PMA	qt_5_3D9_man03	/Volumes/Promise RAID/Alf/for_Thea/experiments/quantification_test 5_3D9/3D9_5
291	144	13,556	120	PMA	311,314,314,315,315,316,316,315,315,314,314,313,313,305,305,304,304,303,303,304,304,305,305,307,307,309,309,311,	951,951,952,952,954,954,960,960,961,961,963,963,964,964,963,963,962,962,956,956,954,954,953,953,951,951,950,950,	/Volumes/Promise RAID 2/Alf/for_Thea/experiments/quantification_test 5_3D9/str_data/PMA/120/3D9_PMA_120image_hoescht179.TIF 3D9_PMA_120image_568178.tif	1750	13,556	0	preAnalysis	none	none	120 PMA	qt_5_3D9_man03	/Volumes/Promise RAID/Alf/for_Thea/experiments/quantification_test 5_3D9/3D9_5
292	216	10,963	120	PMA	346,347,347,348,348,350,350,352,352,353,353,354,354,355,355,356,356,355,355,354,354,352,352,350,350,348,348,347,347,346,346,345,345,344,344,342,342,340,340,339,339,338,338,339,339,340,340,341,341,342,342,343,343,346,	953,953,954,954,955,955,956,956,957,957,958,958,959,959,961,961,967,967,969,969,970,970,971,971,970,970,969,969,968,968,967,967,966,966,965,965,964,964,963,963,962,962,957,957,956,956,955,955,954,954,953,953,952,952,	/Volumes/Promise RAID 2/Alf/for_Thea/experiments/quantification_test 5_3D9/str_data/PMA/120/3D9_PMA_120image_hoescht179.TIF 3D9_PMA_120image_568178.tif	1750	10,963	0	preAnalysis	none	none	120 PMA	qt_5_3D9_man03	/Volumes/Promise RAID/Alf/for_Thea/experiments/quantification_test 5_3D9/3D9_5
293	222	14,342	120	PMA	626,628,628,629,629,630,630,631,631,632,632,631,631,630,630,628,628,623,623,622,622,620,620,617,617,616,616,615,615,614,614,615,615,616,616,617,617,619,619,626,	987,987,988,988,989,989,990,990,992,992,998,998,1000,1000,1001,1001,1002,1002,1001,1001,1000,1000,999,999,998,998,997,997,996,996,991,991,989,989,988,988,987,987,986,986,	/Volumes/Promise RAID 2/Alf/for_Thea/experiments/quantification_test 5_3D9/str_data/PMA/120/3D9_PMA_120image_hoescht179.TIF 3D9_PMA_120image_568178.tif	1750	14,342	0	preAnalysis	none	none	120 PMA	qt_5_3D9_man03	/Volumes/Promise RAID/Alf/for_Thea/experiments/quantification_test 5_3D9/3D9_5
294	296	12,973	120	PMA	880,881,881,883,883,884,884,885,885,886,886,885,885,884,884,883,883,882,882,880,880,879,879,877,877,876,876,875,875,872,872,871,871,869,869,868,868,869,869,870,870,871,871,872,872,873,873,875,875,880,	999,999,1000,1000,1002,1002,1003,1003,1005,1005,1011,1011,1013,1013,1015,1015,1016,1016,1017,1017,1018,1018,1019,1019,1020,1020,1019,1019,1020,1020,1019,1019,1018,1018,1016,1016,1008,1008,1006,1006,1005,1005,1003,1003,1000,1000,999,999,998,998,	/Volumes/Promise RAID 2/Alf/for_Thea/experiments/quantification_test 5_3D9/str_data/PMA/120/3D9_PMA_120image_hoescht179.TIF 3D9_PMA_120image_568178.tif	1750	12,973	0	preAnalysis	none	none	120 PMA	qt_5_3D9_man03	/Volumes/Promise RAID/Alf/for_Thea/experiments/quantification_test 5_3D9/3D9_5
295	236	12,61	120	PMA	687,689,689,691,691,692,692,693,693,694,694,693,693,692,692,691,691,690,690,688,688,682,682,681,681,680,680,679,679,678,678,677,677,678,678,679,679,680,680,687,	6,6,7,7,8,8,10,10,11,11,16,16,19,19,20,20,21,21,22,22,23,23,22,22,21,21,20,20,14,14,13,13,9,9,7,7,6,6,5,5,	/Volumes/Promise RAID 2/Alf/for_Thea/experiments/quantification_test 5_3D9/str_data/PMA/120/3D9_PMA_120image_hoescht183.TIF 3D9_PMA_120image_568182.tif	1750	12,61	0	preAnalysis	none	none	120 PMA	qt_5_3D9_man03	/Volumes/Promise RAID/Alf/for_Thea/experiments/quantification_test 5_3D9/3D9_5
296	186	6,194	120	PMA	131,132,132,133,133,134,134,135,135,134,134,133,133,132,132,130,130,123,123,122,122,121,121,120,120,119,119,120,120,121,121,123,123,124,124,131,	16,16,17,17,20,20,21,21,25,25,27,27,28,28,29,29,30,30,29,29,28,28,26,26,23,23,21,21,18,18,17,17,16,16,15,15,	/Volumes/Promise RAID 2/Alf/for_Thea/experiments/quantification_test 5_3D9/str_data/PMA/120/3D9_PMA_120image_hoescht183.TIF 3D9_PMA_120image_568182.tif	1750	6,194	0	preAnalysis	none	none	120 PMA	qt_5_3D9_man03	/Volumes/Promise RAID/Alf/for_Thea/experiments/quantification_test 5_3D9/3D9_5
297	202	11,01	120	PMA	517,521,521,523,523,524,524,525,525,526,526,525,525,524,524,523,523,514,514,512,512,511,511,510,510,509,509,510,510,511,511,512,512,515,515,517,	23,23,24,24,25,25,26,26,28,28,33,33,35,35,36,36,37,37,36,36,35,35,34,34,32,32,27,27,25,25,24,24,23,23,22,22,	/Volumes/Promise RAID 2/Alf/for_Thea/experiments/quantification_test 5_3D9/str_data/PMA/120/3D9_PMA_120image_hoescht183.TIF 3D9_PMA_120image_568182.tif	1750	11,01	0	preAnalysis	none	none	120 PMA	qt_5_3D9_man03	/Volumes/Promise RAID/Alf/for_Thea/experiments/quantification_test 5_3D9/3D9_5
298	222	15,063	120	PMA	822,823,823,825,825,826,826,827,827,828,828,829,829,828,828,827,827,826,826,825,825,823,823,818,818,816,816,815,815,814,814,813,813,812,812,811,811,812,812,813,813,814,814,815,815,817,817,822,	24,24,25,25,26,26,27,27,29,29,32,32,33,33,36,36,37,37,38,38,39,39,40,40,39,39,38,38,37,37,36,36,35,35,33,33,28,28,27,27,26,26,25,25,24,24,23,23,	/Volumes/Promise RAID 2/Alf/for_Thea/experiments/quantification_test 5_3D9/str_data/PMA/120/3D9_PMA_120image_hoescht183.TIF 3D9_PMA_120image_568182.tif	1750	15,063	0	preAnalysis	none	none	120 PMA	qt_5_3D9_man03	/Volumes/Promise RAID/Alf/for_Thea/experiments/quantification_test 5_3D9/3D9_5
299	252	15,111	120	PMA	855,858,858,859,859,860,860,861,861,863,863,864,864,865,865,866,866,865,865,863,863,857,857,856,856,855,855,854,854,852,852,850,850,849,849,848,848,847,847,846,846,847,847,849,849,850,850,852,852,855,	33,33,34,34,35,35,37,37,38,38,39,39,40,40,42,42,48,48,50,50,51,51,50,50,49,49,48,48,47,47,46,46,45,45,44,44,42,42,40,40,38,38,35,35,34,34,33,33,32,32,	/Volumes/Promise RAID 2/Alf/for_Thea/experiments/quantification_test 5_3D9/str_data/PMA/120/3D9_PMA_120image_hoescht183.TIF 3D9_PMA_120image_568182.tif	1750	15,111	0	preAnalysis	none	none	120 PMA	qt_5_3D9_man03	/Volumes/Promise RAID/Alf/for_Thea/experiments/quantification_test 5_3D9/3D9_5
300	211	12,512	120	PMA	1339,1340,1340,1341,1341,1342,1342,1343,1343,1342,1342,1341,1341,1340,1340,1339,1339,1336,1336,1334,1334,1328,1328,1327,1327,1326,1326,1327,1327,1328,1328,1329,1329,1330,1330,1331,1331,1332,1332,1335,1335,1339,	38,38,39,39,40,40,42,42,47,47,49,49,50,50,51,51,52,52,53,53,54,54,53,53,51,51,47,47,44,44,43,43,42,42,40,40,39,39,38,38,37,37,	/Volumes/Promise RAID 2/Alf/for_Thea/experiments/quantification_test 5_3D9/str_data/PMA/120/3D9_PMA_120image_hoescht183.TIF 3D9_PMA_120image_568182.tif	1750	12,512	0	preAnalysis	none	none	120 PMA	qt_5_3D9_man03	/Volumes/Promise RAID/Alf/for_Thea/experiments/quantification_test 5_3D9/3D9_5
301	475	35,198	120	PMA	418,423,423,425,425,426,426,427,427,428,428,427,427,426,426,425,425,423,423,420,420,412,412,408,408,406,406,404,404,402,402,401,401,400,400,401,401,403,403,405,405,406,406,408,408,411,411,412,412,416,416,418,	41,41,42,42,43,43,44,44,50,50,57,57,58,58,59,59,60,60,61,61,62,62,61,61,60,60,59,59,58,58,57,57,55,55,48,48,47,47,46,46,45,45,44,44,43,43,42,42,41,41,40,40,	/Volumes/Promise RAID 2/Alf/for_Thea/experiments/quantification_test 5_3D9/str_data/PMA/120/3D9_PMA_120image_hoescht183.TIF 3D9_PMA_120image_568182.tif	1750	35,198	0	preAnalysis	none	none	120 PMA	qt_5_3D9_man03	/Volumes/Promise RAID/Alf/for_Thea/experiments/quantification_test 5_3D9/3D9_5
302	205	14,517	120	PMA	605,607,607,608,608,609,609,610,610,609,609,608,608,607,607,606,606,605,605,603,603,598,598,596,596,595,595,594,594,593,593,592,592,593,593,594,594,595,595,596,596,605,	42,42,43,43,44,44,46,46,48,48,50,50,51,51,53,53,54,54,55,55,56,56,55,55,54,54,53,53,52,52,50,50,45,45,44,44,43,43,42,42,41,41,	/Volumes/Promise RAID 2/Alf/for_Thea/experiments/quantification_test 5_3D9/str_data/PMA/120/3D9_PMA_120image_hoescht183.TIF 3D9_PMA_120image_568182.tif	1750	14,517	0	preAnalysis	none	none	120 PMA	qt_5_3D9_man03	/Volumes/Promise RAID/Alf/for_Thea/experiments/quantification_test 5_3D9/3D9_5
303	236	14,712	120	PMA	867,868,868,869,869,870,870,871,871,872,872,871,871,869,869,867,867,864,864,861,861,860,860,858,858,857,857,856,856,855,855,856,856,857,857,859,859,867,	80,80,81,81,82,82,84,84,87,87,93,93,95,95,96,96,97,97,96,96,95,95,94,94,92,92,91,91,86,86,83,83,81,81,80,80,79,79,	/Volumes/Promise RAID 2/Alf/for_Thea/experiments/quantification_test 5_3D9/str_data/PMA/120/3D9_PMA_120image_hoescht183.TIF 3D9_PMA_120image_568182.tif	1750	14,712	0	preAnalysis	none	none	120 PMA	qt_5_3D9_man03	/Volumes/Promise RAID/Alf/for_Thea/experiments/quantification_test 5_3D9/3D9_5
304	237	11,342	120	PMA	570,572,572,573,573,574,574,575,575,576,576,575,575,574,574,573,573,572,572,566,566,559,559,558,558,557,557,556,556,557,557,558,558,559,559,560,560,562,562,570,	83,83,84,84,85,85,86,86,90,90,92,92,94,94,95,95,96,96,97,97,96,96,95,95,94,94,93,93,88,88,86,86,85,85,84,84,83,83,82,82,	/Volumes/Promise RAID 2/Alf/for_Thea/experiments/quantification_test 5_3D9/str_data/PMA/120/3D9_PMA_120image_hoescht183.TIF 3D9_PMA_120image_568182.tif	1750	11,342	0	preAnalysis	none	none	120 PMA	qt_5_3D9_man03	/Volumes/Promise RAID/Alf/for_Thea/experiments/quantification_test 5_3D9/3D9_5
305	235	13,685	120	PMA	1204,1209,1209,1210,1210,1211,1211,1210,1210,1208,1208,1206,1206,1198,1198,1196,1196,1195,1195,1194,1194,1193,1193,1192,1192,1193,1193,1194,1194,1195,1195,1197,1197,1204,	100,100,101,101,103,103,110,110,112,112,113,113,114,114,113,113,112,112,111,111,110,110,108,108,104,104,102,102,101,101,100,100,99,99,	/Volumes/Promise RAID 2/Alf/for_Thea/experiments/quantification_test 5_3D9/str_data/PMA/120/3D9_PMA_120image_hoescht183.TIF 3D9_PMA_120image_568182.tif	1750	13,685	0	preAnalysis	none	none	120 PMA	qt_5_3D9_man03	/Volumes/Promise RAID/Alf/for_Thea/experiments/quantification_test 5_3D9/3D9_5
306	236	12,271	120	PMA	1310,1311,1311,1312,1312,1313,1313,1314,1314,1313,1313,1312,1312,1311,1311,1309,1309,1307,1307,1300,1300,1298,1298,1297,1297,1296,1296,1297,1297,1298,1298,1299,1299,1300,1300,1301,1301,1302,1302,1303,1303,1310,	110,110,111,111,112,112,113,113,119,119,122,122,123,123,124,124,125,125,126,126,125,125,123,123,122,122,118,118,116,116,114,114,113,113,112,112,111,111,110,110,109,109,	/Volumes/Promise RAID 2/Alf/for_Thea/experiments/quantification_test 5_3D9/str_data/PMA/120/3D9_PMA_120image_hoescht183.TIF 3D9_PMA_120image_568182.tif	1750	12,271	0	preAnalysis	none	none	120 PMA	qt_5_3D9_man03	/Volumes/Promise RAID/Alf/for_Thea/experiments/quantification_test 5_3D9/3D9_5
307	242	13,223	120	PMA	1282,1284,1284,1285,1285,1286,1286,1287,1287,1286,1286,1287,1287,1286,1286,1285,1285,1283,1283,1282,1282,1273,1273,1271,1271,1270,1270,1269,1269,1268,1268,1269,1269,1270,1270,1271,1271,1272,1272,1275,1275,1282,	149,149,151,151,152,152,153,153,154,154,155,155,158,158,160,160,162,162,163,163,164,164,163,163,162,162,161,161,159,159,156,156,152,152,151,151,150,150,149,149,148,148,	/Volumes/Promise RAID 2/Alf/for_Thea/experiments/quantification_test 5_3D9/str_data/PMA/120/3D9_PMA_120image_hoescht183.TIF 3D9_PMA_120image_568182.tif	1750	13,223	0	preAnalysis	none	none	120 PMA	qt_5_3D9_man03	/Volumes/Promise RAID/Alf/for_Thea/experiments/quantification_test 5_3D9/3D9_5
308	219	15,416	120	PMA	1229,1232,1232,1234,1234,1235,1235,1236,1236,1237,1237,1236,1236,1234,1234,1230,1230,1229,1229,1226,1226,1224,1224,1223,1223,1221,1221,1220,1220,1219,1219,1220,1220,1221,1221,1224,1224,1229,	170,170,171,171,172,172,173,173,174,174,181,181,183,183,184,184,185,185,184,184,183,183,182,182,181,181,180,180,178,178,172,172,171,171,170,170,169,169,	/Volumes/Promise RAID 2/Alf/for_Thea/experiments/quantification_test 5_3D9/str_data/PMA/120/3D9_PMA_120image_hoescht183.TIF 3D9_PMA_120image_568182.tif	1750	15,416	0	preAnalysis	none	none	120 PMA	qt_5_3D9_man03	/Volumes/Promise RAID/Alf/for_Thea/experiments/quantification_test 5_3D9/3D9_5
309	248	14,839	120	PMA	1096,1098,1098,1099,1099,1100,1100,1099,1099,1098,1098,1097,1097,1095,1095,1090,1090,1087,1087,1086,1086,1085,1085,1084,1084,1083,1083,1082,1082,1083,1083,1084,1084,1085,1085,1087,1087,1096,	186,186,188,188,190,190,197,197,199,199,200,200,201,201,202,202,201,201,200,200,199,199,198,198,197,197,194,194,189,189,188,188,187,187,186,186,185,185,	/Volumes/Promise RAID 2/Alf/for_Thea/experiments/quantification_test 5_3D9/str_data/PMA/120/3D9_PMA_120image_hoescht183.TIF 3D9_PMA_120image_568182.tif	1750	14,839	0	preAnalysis	none	none	120 PMA	qt_5_3D9_man03	/Volumes/Promise RAID/Alf/for_Thea/experiments/quantification_test 5_3D9/3D9_5
310	234	14,496	120	PMA	976,978,978,979,979,980,980,979,979,978,978,977,977,976,976,974,974,971,971,970,970,968,968,966,966,964,964,963,963,962,962,963,963,964,964,966,966,967,967,968,968,970,970,976,	198,198,199,199,201,201,207,207,208,208,210,210,211,211,213,213,214,214,215,215,214,214,213,213,212,212,210,210,208,208,204,204,202,202,201,201,200,200,199,199,198,198,197,197,	/Volumes/Promise RAID 2/Alf/for_Thea/experiments/quantification_test 5_3D9/str_data/PMA/120/3D9_PMA_120image_hoescht183.TIF 3D9_PMA_120image_568182.tif	1750	14,496	0	preAnalysis	none	none	120 PMA	qt_5_3D9_man03	/Volumes/Promise RAID/Alf/for_Thea/experiments/quantification_test 5_3D9/3D9_5
311	210	13,79	120	PMA	561,562,562,561,561,560,560,559,559,558,558,557,557,555,555,549,549,547,547,546,546,545,545,544,544,545,545,546,546,547,547,550,550,553,553,561,	205,205,211,211,213,213,214,214,215,215,216,216,217,217,218,218,217,217,216,216,214,214,213,213,209,209,207,207,206,206,205,205,204,204,203,203,	/Volumes/Promise RAID 2/Alf/for_Thea/experiments/quantification_test 5_3D9/str_data/PMA/120/3D9_PMA_120image_hoescht183.TIF 3D9_PMA_120image_568182.tif	1750	13,79	0	preAnalysis	none	none	120 PMA	qt_5_3D9_man03	/Volumes/Promise RAID/Alf/for_Thea/experiments/quantification_test 5_3D9/3D9_5
312	234	15,444	120	PMA	910,915,915,917,917,918,918,919,919,920,920,919,919,918,918,917,917,915,915,912,912,906,906,905,905,904,904,903,903,902,902,903,903,904,904,905,905,906,906,907,907,909,909,910,	214,214,215,215,216,216,217,217,218,218,225,225,226,226,227,227,228,228,229,229,230,230,229,229,228,228,227,227,226,226,219,219,218,218,217,217,216,216,215,215,214,214,213,213,	/Volumes/Promise RAID 2/Alf/for_Thea/experiments/quantification_test 5_3D9/str_data/PMA/120/3D9_PMA_120image_hoescht183.TIF 3D9_PMA_120image_568182.tif	1750	15,444	0	preAnalysis	none	none	120 PMA	qt_5_3D9_man03	/Volumes/Promise RAID/Alf/for_Thea/experiments/quantification_test 5_3D9/3D9_5
313	218	19,872	120	PMA	639,640,640,642,642,643,643,644,644,645,645,644,644,643,643,642,642,641,641,639,639,637,637,634,634,631,631,629,629,628,628,627,627,626,626,627,627,628,628,630,630,632,632,639,	215,215,216,216,217,217,219,219,221,221,223,223,226,226,227,227,228,228,229,229,230,230,229,229,228,228,227,227,225,225,224,224,222,222,219,219,217,217,216,216,215,215,214,214,	/Volumes/Promise RAID 2/Alf/for_Thea/experiments/quantification_test 5_3D9/str_data/PMA/120/3D9_PMA_120image_hoescht183.TIF 3D9_PMA_120image_568182.tif	1750	19,872	0	preAnalysis	none	none	120 PMA	qt_5_3D9_man03	/Volumes/Promise RAID/Alf/for_Thea/experiments/quantification_test 5_3D9/3D9_5
314	273	14,769	120	PMA	1108,1110,1110,1111,1111,1110,1110,1109,1109,1108,1108,1107,1107,1106,1106,1105,1105,1103,1103,1096,1096,1094,1094,1093,1093,1092,1092,1091,1091,1090,1090,1091,1091,1092,1092,1093,1093,1094,1094,1097,1097,1099,1099,1100,1100,1102,1102,1108,	225,225,227,227,233,233,235,235,236,236,237,237,239,239,240,240,241,241,242,242,241,241,240,240,239,239,238,238,236,236,233,233,231,231,230,230,229,229,228,228,227,227,226,226,225,225,224,224,	/Volumes/Promise RAID 2/Alf/for_Thea/experiments/quantification_test 5_3D9/str_data/PMA/120/3D9_PMA_120image_hoescht183.TIF 3D9_PMA_120image_568182.tif	1750	14,769	0	preAnalysis	none	none	120 PMA	qt_5_3D9_man03	/Volumes/Promise RAID/Alf/for_Thea/experiments/quantification_test 5_3D9/3D9_5
315	172	4,93	120	PMA	68,70,70,71,71,72,72,74,74,75,75,76,76,75,75,74,74,73,73,71,71,67,67,65,65,63,63,62,62,61,61,60,60,61,61,62,62,63,63,64,64,68,	233,233,235,235,236,236,237,237,238,238,240,240,242,242,244,244,245,245,246,246,247,247,248,248,247,247,246,246,241,241,240,240,237,237,235,235,234,234,233,233,232,232,	/Volumes/Promise RAID 2/Alf/for_Thea/experiments/quantification_test 5_3D9/str_data/PMA/120/3D9_PMA_120image_hoescht183.TIF 3D9_PMA_120image_568182.tif	1750	4,93	0	preAnalysis	none	none	120 PMA	qt_5_3D9_man03	/Volumes/Promise RAID/Alf/for_Thea/experiments/quantification_test 5_3D9/3D9_5
316	202	9,505	120	PMA	411,413,413,415,415,416,416,417,417,416,416,415,415,414,414,411,411,410,410,405,405,403,403,402,402,401,401,402,402,403,403,405,405,407,407,411,	249,249,250,250,251,251,253,253,259,259,260,260,261,261,262,262,263,263,264,264,263,263,262,262,261,261,253,253,251,251,250,250,249,249,248,248,	/Volumes/Promise RAID 2/Alf/for_Thea/experiments/quantification_test 5_3D9/str_data/PMA/120/3D9_PMA_120image_hoescht183.TIF 3D9_PMA_120image_568182.tif	1750	9,505	0	preAnalysis	none	none	120 PMA	qt_5_3D9_man03	/Volumes/Promise RAID/Alf/for_Thea/experiments/quantification_test 5_3D9/3D9_5
317	255	14,306	120	PMA	929,931,931,932,932,933,933,934,934,933,933,932,932,931,931,930,930,927,927,916,916,915,915,914,914,913,913,914,914,915,915,916,916,918,918,923,923,929,	256,256,257,257,258,258,259,259,264,264,266,266,267,267,268,268,269,269,270,270,269,269,268,268,265,265,261,261,260,260,258,258,257,257,256,256,255,255,	/Volumes/Promise RAID 2/Alf/for_Thea/experiments/quantification_test 5_3D9/str_data/PMA/120/3D9_PMA_120image_hoescht183.TIF 3D9_PMA_120image_568182.tif	1750	14,306	0	preAnalysis	none	none	120 PMA	qt_5_3D9_man03	/Volumes/Promise RAID/Alf/for_Thea/experiments/quantification_test 5_3D9/3D9_5
318	208	12,769	120	PMA	503,506,506,507,507,508,508,509,509,510,510,509,509,508,508,507,507,505,505,501,501,499,499,498,498,496,496,495,495,494,494,493,493,494,494,495,495,496,496,498,498,500,500,503,	271,271,272,272,273,273,274,274,276,276,280,280,283,283,285,285,286,286,287,287,286,286,285,285,284,284,283,283,281,281,279,279,277,277,274,274,273,273,272,272,271,271,270,270,	/Volumes/Promise RAID 2/Alf/for_Thea/experiments/quantification_test 5_3D9/str_data/PMA/120/3D9_PMA_120image_hoescht183.TIF 3D9_PMA_120image_568182.tif	1750	12,769	0	preAnalysis	none	none	120 PMA	qt_5_3D9_man03	/Volumes/Promise RAID/Alf/for_Thea/experiments/quantification_test 5_3D9/3D9_5
319	176	9,727	120	PMA	164,166,166,167,167,168,168,169,169,170,170,169,169,168,168,167,167,166,166,165,165,160,160,158,158,157,157,156,156,155,155,156,156,157,157,159,159,164,	274,274,275,275,276,276,277,277,279,279,283,283,284,284,286,286,287,287,288,288,289,289,288,288,286,286,283,283,280,280,278,278,276,276,274,274,273,273,	/Volumes/Promise RAID 2/Alf/for_Thea/experiments/quantification_test 5_3D9/str_data/PMA/120/3D9_PMA_120image_hoescht183.TIF 3D9_PMA_120image_568182.tif	1750	9,727	0	preAnalysis	none	none	120 PMA	qt_5_3D9_man03	/Volumes/Promise RAID/Alf/for_Thea/experiments/quantification_test 5_3D9/3D9_5
320	146	12,055	120	PMA	296,298,298,299,299,298,298,297,297,296,296,294,294,290,290,288,288,287,287,286,286,287,287,288,288,289,289,290,290,296,	283,283,285,285,291,291,293,293,294,294,295,295,296,296,295,295,294,294,292,292,287,287,285,285,284,284,283,283,282,282,	/Volumes/Promise RAID 2/Alf/for_Thea/experiments/quantification_test 5_3D9/str_data/PMA/120/3D9_PMA_120image_hoescht183.TIF 3D9_PMA_120image_568182.tif	1750	12,055	0	preAnalysis	none	none	120 PMA	qt_5_3D9_man03	/Volumes/Promise RAID/Alf/for_Thea/experiments/quantification_test 5_3D9/3D9_5
321	236	15,119	120	PMA	859,862,862,863,863,864,864,865,865,864,864,863,863,862,862,861,861,857,857,856,856,855,855,854,854,850,850,848,848,847,847,846,846,845,845,846,846,847,847,849,849,850,850,859,	288,288,289,289,290,290,292,292,297,297,298,298,299,299,300,300,301,301,302,302,301,301,302,302,301,301,300,300,299,299,298,298,297,297,291,291,290,290,289,289,288,288,287,287,	/Volumes/Promise RAID 2/Alf/for_Thea/experiments/quantification_test 5_3D9/str_data/PMA/120/3D9_PMA_120image_hoescht183.TIF 3D9_PMA_120image_568182.tif	1750	15,119	0	preAnalysis	none	none	120 PMA	qt_5_3D9_man03	/Volumes/Promise RAID/Alf/for_Thea/experiments/quantification_test 5_3D9/3D9_5
322	193	11,938	120	PMA	353,358,358,360,360,361,361,360,360,359,359,358,358,357,357,348,348,347,347,346,346,345,345,344,344,345,345,346,346,348,348,353,	301,301,302,302,303,303,310,310,311,311,312,312,313,313,314,314,313,313,312,312,310,310,308,308,305,305,303,303,301,301,300,300,	/Volumes/Promise RAID 2/Alf/for_Thea/experiments/quantification_test 5_3D9/str_data/PMA/120/3D9_PMA_120image_hoescht183.TIF 3D9_PMA_120image_568182.tif	1750	11,938	0	preAnalysis	none	none	120 PMA	qt_5_3D9_man03	/Volumes/Promise RAID/Alf/for_Thea/experiments/quantification_test 5_3D9/3D9_5
323	260	15,2	120	PMA	1089,1091,1091,1092,1092,1093,1093,1094,1094,1093,1093,1092,1092,1091,1091,1075,1075,1074,1074,1073,1073,1072,1072,1073,1073,1074,1074,1076,1076,1078,1078,1081,1081,1089,	301,301,302,302,303,303,305,305,311,311,312,312,313,313,314,314,313,313,312,312,310,310,306,306,304,304,303,303,302,302,301,301,300,300,	/Volumes/Promise RAID 2/Alf/for_Thea/experiments/quantification_test 5_3D9/str_data/PMA/120/3D9_PMA_120image_hoescht183.TIF 3D9_PMA_120image_568182.tif	1750	15,2	0	preAnalysis	none	none	120 PMA	qt_5_3D9_man03	/Volumes/Promise RAID/Alf/for_Thea/experiments/quantification_test 5_3D9/3D9_5
324	256	15,062	120	PMA	772,777,777,778,778,779,779,780,780,781,781,780,780,779,779,778,778,776,776,773,773,770,770,766,766,765,765,764,764,763,763,762,762,763,763,764,764,765,765,766,766,768,768,772,	311,311,312,312,313,313,315,315,317,317,318,318,323,323,324,324,326,326,327,327,328,328,327,327,326,326,325,325,324,324,322,322,317,317,315,315,313,313,312,312,311,311,310,310,	/Volumes/Promise RAID 2/Alf/for_Thea/experiments/quantification_test 5_3D9/str_data/PMA/120/3D9_PMA_120image_hoescht183.TIF 3D9_PMA_120image_568182.tif	1750	15,062	0	preAnalysis	none	none	120 PMA	qt_5_3D9_man03	/Volumes/Promise RAID/Alf/for_Thea/experiments/quantification_test 5_3D9/3D9_5
325	253	14,419	120	PMA	1318,1321,1321,1323,1323,1324,1324,1325,1325,1324,1324,1323,1323,1322,1322,1321,1321,1311,1311,1308,1308,1306,1306,1305,1305,1304,1304,1305,1305,1306,1306,1307,1307,1308,1308,1310,1310,1318,	334,334,335,335,337,337,340,340,342,342,345,345,346,346,347,347,348,348,347,347,346,346,345,345,343,343,339,339,337,337,336,336,335,335,334,334,333,333,	/Volumes/Promise RAID 2/Alf/for_Thea/experiments/quantification_test 5_3D9/str_data/PMA/120/3D9_PMA_120image_hoescht183.TIF 3D9_PMA_120image_568182.tif	1750	14,419	0	preAnalysis	none	none	120 PMA	qt_5_3D9_man03	/Volumes/Promise RAID/Alf/for_Thea/experiments/quantification_test 5_3D9/3D9_5
326	204	8	120	PMA	380,383,383,385,385,387,387,388,388,387,387,385,385,381,381,378,378,376,376,372,372,371,371,370,370,369,369,370,370,371,371,372,372,374,374,380,	372,372,373,373,374,374,376,376,382,382,383,383,384,384,385,385,384,384,383,383,382,382,381,381,380,380,375,375,374,374,373,373,372,372,371,371,	/Volumes/Promise RAID 2/Alf/for_Thea/experiments/quantification_test 5_3D9/str_data/PMA/120/3D9_PMA_120image_hoescht183.TIF 3D9_PMA_120image_568182.tif	1750	8	0	preAnalysis	none	none	120 PMA	qt_5_3D9_man03	/Volumes/Promise RAID/Alf/for_Thea/experiments/quantification_test 5_3D9/3D9_5
327	276	14,783	120	PMA	1196,1197,1197,1198,1198,1199,1199,1198,1198,1197,1197,1196,1196,1195,1195,1194,1194,1191,1191,1189,1189,1185,1185,1184,1184,1182,1182,1181,1181,1180,1180,1179,1179,1180,1180,1181,1181,1183,1183,1184,1184,1190,1190,1196,	397,397,398,398,399,399,407,407,409,409,410,410,411,411,412,412,413,413,414,414,413,413,412,412,411,411,410,410,409,409,406,406,402,402,401,401,399,399,398,398,397,397,396,396,	/Volumes/Promise RAID 2/Alf/for_Thea/experiments/quantification_test 5_3D9/str_data/PMA/120/3D9_PMA_120image_hoescht183.TIF 3D9_PMA_120image_568182.tif	1750	14,783	0	preAnalysis	none	none	120 PMA	qt_5_3D9_man03	/Volumes/Promise RAID/Alf/for_Thea/experiments/quantification_test 5_3D9/3D9_5
328	254	15,37	120	PMA	1012,1013,1013,1014,1014,1015,1015,1016,1016,1017,1017,1016,1016,1015,1015,1014,1014,1013,1013,1011,1011,1010,1010,1006,1006,1004,1004,1003,1003,1002,1002,1001,1001,1000,1000,999,999,998,998,999,999,1000,1000,1001,1001,1003,1003,1012,	398,398,399,399,400,400,401,401,403,403,409,409,410,410,411,411,412,412,413,413,414,414,415,415,414,414,413,413,412,412,410,410,408,408,407,407,405,405,402,402,400,400,399,399,398,398,397,397,	/Volumes/Promise RAID 2/Alf/for_Thea/experiments/quantification_test 5_3D9/str_data/PMA/120/3D9_PMA_120image_hoescht183.TIF 3D9_PMA_120image_568182.tif	1750	15,37	0	preAnalysis	none	none	120 PMA	qt_5_3D9_man03	/Volumes/Promise RAID/Alf/for_Thea/experiments/quantification_test 5_3D9/3D9_5
329	290	14,897	120	PMA	1086,1092,1092,1093,1093,1097,1097,1098,1098,1099,1099,1100,1100,1099,1099,1098,1098,1097,1097,1096,1096,1094,1094,1093,1093,1092,1092,1087,1087,1085,1085,1084,1084,1082,1082,1081,1081,1080,1080,1079,1079,1080,1080,1081,1081,1083,1083,1084,1084,1086,	416,416,417,417,418,418,419,419,420,420,422,422,426,426,428,428,429,429,430,430,431,431,432,432,433,433,434,434,433,433,432,432,431,431,429,429,428,428,427,427,420,420,418,418,417,417,416,416,415,415,	/Volumes/Promise RAID 2/Alf/for_Thea/experiments/quantification_test 5_3D9/str_data/PMA/120/3D9_PMA_120image_hoescht183.TIF 3D9_PMA_120image_568182.tif	1750	14,897	0	preAnalysis	none	none	120 PMA	qt_5_3D9_man03	/Volumes/Promise RAID/Alf/for_Thea/experiments/quantification_test 5_3D9/3D9_5
330	198	4,364	120	PMA	260,261,261,262,262,263,263,264,264,263,263,262,262,261,261,260,260,259,259,252,252,250,250,249,249,248,248,247,247,248,248,249,249,250,250,251,251,253,253,254,254,255,255,260,	418,418,419,419,420,420,424,424,425,425,429,429,430,430,431,431,432,432,433,433,432,432,431,431,430,430,428,428,424,424,423,423,422,422,421,421,420,420,419,419,418,418,417,417,	/Volumes/Promise RAID 2/Alf/for_Thea/experiments/quantification_test 5_3D9/str_data/PMA/120/3D9_PMA_120image_hoescht183.TIF 3D9_PMA_120image_568182.tif	1750	4,364	0	preAnalysis	none	none	120 PMA	qt_5_3D9_man03	/Volumes/Promise RAID/Alf/for_Thea/experiments/quantification_test 5_3D9/3D9_5
331	260	14,462	120	PMA	1239,1242,1242,1244,1244,1245,1245,1246,1246,1245,1245,1244,1244,1243,1243,1242,1242,1240,1240,1236,1236,1234,1234,1232,1232,1231,1231,1230,1230,1229,1229,1230,1230,1231,1231,1232,1232,1234,1234,1238,1238,1239,	420,420,421,421,423,423,427,427,432,432,434,434,436,436,437,437,438,438,439,439,438,438,437,437,436,436,434,434,432,432,425,425,423,423,422,422,421,421,420,420,419,419,	/Volumes/Promise RAID 2/Alf/for_Thea/experiments/quantification_test 5_3D9/str_data/PMA/120/3D9_PMA_120image_hoescht183.TIF 3D9_PMA_120image_568182.tif	1750	14,462	0	preAnalysis	none	none	120 PMA	qt_5_3D9_man03	/Volumes/Promise RAID/Alf/for_Thea/experiments/quantification_test 5_3D9/3D9_5
332	179	0,179	120	PMA	27,28,28,29,29,30,30,31,31,30,30,29,29,27,27,24,24,22,22,20,20,19,19,20,20,21,21,23,23,27,	429,429,430,430,435,435,441,441,443,443,445,445,446,446,447,447,446,446,445,445,443,443,432,432,430,430,429,429,428,428,	/Volumes/Promise RAID 2/Alf/for_Thea/experiments/quantification_test 5_3D9/str_data/PMA/120/3D9_PMA_120image_hoescht183.TIF 3D9_PMA_120image_568182.tif	1750	0,179	0	preAnalysis	none	none	120 PMA	qt_5_3D9_man03	/Volumes/Promise RAID/Alf/for_Thea/experiments/quantification_test 5_3D9/3D9_5
333	267	15,727	120	PMA	976,978,978,980,980,981,981,982,982,983,983,982,982,981,981,980,980,979,979,976,976,973,973,971,971,969,969,968,968,967,967,966,966,967,967,968,968,969,969,971,971,976,	443,443,444,444,445,445,446,446,448,448,456,456,458,458,459,459,460,460,461,461,462,462,461,461,460,460,459,459,457,457,452,452,447,447,445,445,444,444,443,443,442,442,	/Volumes/Promise RAID 2/Alf/for_Thea/experiments/quantification_test 5_3D9/str_data/PMA/120/3D9_PMA_120image_hoescht183.TIF 3D9_PMA_120image_568182.tif	1750	15,727	0	preAnalysis	none	none	120 PMA	qt_5_3D9_man03	/Volumes/Promise RAID/Alf/for_Thea/experiments/quantification_test 5_3D9/3D9_5
334	265	15,906	120	PMA	1053,1054,1054,1055,1055,1056,1056,1055,1055,1054,1054,1052,1052,1050,1050,1049,1049,1041,1041,1040,1040,1039,1039,1038,1038,1037,1037,1036,1036,1037,1037,1038,1038,1039,1039,1040,1040,1042,1042,1044,1044,1053,	454,454,455,455,457,457,464,464,465,465,467,467,468,468,469,469,470,470,469,469,468,468,467,467,466,466,462,462,461,461,459,459,458,458,456,456,455,455,454,454,453,453,	/Volumes/Promise RAID 2/Alf/for_Thea/experiments/quantification_test 5_3D9/str_data/PMA/120/3D9_PMA_120image_hoescht183.TIF 3D9_PMA_120image_568182.tif	1750	15,906	0	preAnalysis	none	none	120 PMA	qt_5_3D9_man03	/Volumes/Promise RAID/Alf/for_Thea/experiments/quantification_test 5_3D9/3D9_5
335	314	15,178	120	PMA	1253,1254,1254,1255,1255,1257,1257,1258,1258,1257,1257,1256,1256,1255,1255,1254,1254,1252,1252,1251,1251,1250,1250,1249,1249,1248,1248,1247,1247,1242,1242,1240,1240,1239,1239,1238,1238,1237,1237,1236,1236,1237,1237,1238,1238,1239,1239,1240,1240,1241,1241,1243,1243,1246,1246,1253,	462,462,463,463,464,464,468,468,469,469,471,471,472,472,473,473,474,474,475,475,476,476,478,478,479,479,481,481,482,482,481,481,480,480,479,479,477,477,475,475,469,469,467,467,466,466,465,465,464,464,463,463,462,462,461,461,	/Volumes/Promise RAID 2/Alf/for_Thea/experiments/quantification_test 5_3D9/str_data/PMA/120/3D9_PMA_120image_hoescht183.TIF 3D9_PMA_120image_568182.tif	1750	15,178	0	preAnalysis	none	none	120 PMA	qt_5_3D9_man03	/Volumes/Promise RAID/Alf/for_Thea/experiments/quantification_test 5_3D9/3D9_5
336	197	7,959	120	PMA	294,296,296,298,298,299,299,298,298,297,297,296,296,295,295,293,293,285,285,284,284,283,283,282,282,283,283,284,284,285,285,286,286,287,287,288,288,289,289,294,	467,467,468,468,471,471,476,476,478,478,479,479,480,480,481,481,482,482,481,481,480,480,478,478,475,475,474,474,473,473,472,472,471,471,470,470,467,467,466,466,	/Volumes/Promise RAID 2/Alf/for_Thea/experiments/quantification_test 5_3D9/str_data/PMA/120/3D9_PMA_120image_hoescht183.TIF 3D9_PMA_120image_568182.tif	1750	7,959	0	preAnalysis	none	none	120 PMA	qt_5_3D9_man03	/Volumes/Promise RAID/Alf/for_Thea/experiments/quantification_test 5_3D9/3D9_5
337	257	15,377	120	PMA	804,805,805,806,806,807,807,808,808,809,809,810,810,811,811,810,810,809,809,808,808,807,807,806,806,804,804,803,803,802,802,801,801,798,798,797,797,796,796,795,795,796,796,795,795,794,794,795,795,796,796,797,797,799,799,804,	480,480,481,481,482,482,483,483,484,484,485,485,488,488,492,492,495,495,496,496,497,497,498,498,499,499,500,500,499,499,500,500,499,499,498,498,496,496,494,494,492,492,489,489,487,487,486,486,482,482,481,481,480,480,479,479,	/Volumes/Promise RAID 2/Alf/for_Thea/experiments/quantification_test 5_3D9/str_data/PMA/120/3D9_PMA_120image_hoescht183.TIF 3D9_PMA_120image_568182.tif	1750	15,377	0	preAnalysis	none	none	120 PMA	qt_5_3D9_man03	/Volumes/Promise RAID/Alf/for_Thea/experiments/quantification_test 5_3D9/3D9_5
338	660	22,624	120	PMA	620,622,622,623,623,624,624,625,625,626,626,627,627,628,628,629,629,630,630,629,629,628,628,627,627,626,626,625,625,626,626,627,627,628,628,627,627,626,626,624,624,622,622,617,617,616,616,615,615,614,614,613,613,612,612,611,611,610,610,613,613,612,612,611,611,610,610,608,608,607,607,606,606,605,605,604,604,603,603,604,604,603,603,604,604,605,605,606,606,608,608,613,613,620,	488,488,489,489,490,490,491,491,492,492,493,493,494,494,495,495,497,497,501,501,503,503,504,504,505,505,508,508,512,512,515,515,516,516,520,520,522,522,523,523,524,524,525,525,524,524,522,522,521,521,520,520,519,519,518,518,517,517,516,516,510,510,509,509,507,507,506,506,505,505,504,504,502,502,501,501,499,499,497,497,496,496,494,494,492,492,490,490,489,489,488,488,487,487,	/Volumes/Promise RAID 2/Alf/for_Thea/experiments/quantification_test 5_3D9/str_data/PMA/120/3D9_PMA_120image_hoescht183.TIF 3D9_PMA_120image_568182.tif	1750	22,624	0	preAnalysis	none	none	120 PMA	qt_5_3D9_man03	/Volumes/Promise RAID/Alf/for_Thea/experiments/quantification_test 5_3D9/3D9_5
339	269	15,703	120	PMA	1049,1050,1050,1051,1051,1052,1052,1053,1053,1054,1054,1055,1055,1056,1056,1057,1057,1056,1056,1055,1055,1050,1050,1048,1048,1046,1046,1044,1044,1042,1042,1041,1041,1040,1040,1039,1039,1040,1040,1041,1041,1042,1042,1043,1043,1049,	491,491,492,492,494,494,495,495,497,497,498,498,500,500,501,501,508,508,509,509,511,511,510,510,509,509,508,508,507,507,505,505,504,504,500,500,495,495,494,494,492,492,491,491,490,490,	/Volumes/Promise RAID 2/Alf/for_Thea/experiments/quantification_test 5_3D9/str_data/PMA/120/3D9_PMA_120image_hoescht183.TIF 3D9_PMA_120image_568182.tif	1750	15,703	0	preAnalysis	none	none	120 PMA	qt_5_3D9_man03	/Volumes/Promise RAID/Alf/for_Thea/experiments/quantification_test 5_3D9/3D9_5
340	216	13,333	120	PMA	429,431,431,432,432,433,433,432,432,431,431,430,430,429,429,428,428,427,427,425,425,421,421,419,419,418,418,417,417,418,418,419,419,420,420,421,421,422,422,423,423,424,424,429,	501,501,502,502,503,503,509,509,511,511,513,513,515,515,516,516,517,517,518,518,519,519,518,518,516,516,512,512,511,511,507,507,506,506,504,504,503,503,502,502,501,501,500,500,	/Volumes/Promise RAID 2/Alf/for_Thea/experiments/quantification_test 5_3D9/str_data/PMA/120/3D9_PMA_120image_hoescht183.TIF 3D9_PMA_120image_568182.tif	1750	13,333	0	preAnalysis	none	none	120 PMA	qt_5_3D9_man03	/Volumes/Promise RAID/Alf/for_Thea/experiments/quantification_test 5_3D9/3D9_5
341	243	16,058	120	PMA	661,662,662,664,664,665,665,667,667,669,669,670,670,669,669,668,668,665,665,662,662,656,656,655,655,654,654,653,653,652,652,653,653,654,654,661,	501,501,503,503,504,504,505,505,506,506,508,508,514,514,515,515,516,516,517,517,518,518,517,517,516,516,511,511,508,508,503,503,501,501,500,500,	/Volumes/Promise RAID 2/Alf/for_Thea/experiments/quantification_test 5_3D9/str_data/PMA/120/3D9_PMA_120image_hoescht183.TIF 3D9_PMA_120image_568182.tif	1750	16,058	0	preAnalysis	none	none	120 PMA	qt_5_3D9_man03	/Volumes/Promise RAID/Alf/for_Thea/experiments/quantification_test 5_3D9/3D9_5
342	181	1,768	120	PMA	53,56,56,57,57,58,58,57,57,56,56,55,55,49,49,47,47,46,46,45,45,44,44,45,45,46,46,47,47,48,48,50,50,53,	506,506,507,507,508,508,517,517,519,519,520,520,521,521,520,520,519,519,518,518,516,516,510,510,509,509,508,508,507,507,506,506,505,505,	/Volumes/Promise RAID 2/Alf/for_Thea/experiments/quantification_test 5_3D9/str_data/PMA/120/3D9_PMA_120image_hoescht183.TIF 3D9_PMA_120image_568182.tif	1750	1,768	0	preAnalysis	none	none	120 PMA	qt_5_3D9_man03	/Volumes/Promise RAID/Alf/for_Thea/experiments/quantification_test 5_3D9/3D9_5
343	199	8,523	120	PMA	314,315,315,316,316,317,317,318,318,317,317,316,316,315,315,314,314,313,313,311,311,306,306,304,304,303,303,302,302,303,303,302,302,303,303,304,304,305,305,307,307,314,	513,513,514,514,515,515,517,517,522,522,523,523,524,524,525,525,526,526,527,527,528,528,527,527,525,525,523,523,519,519,518,518,517,517,516,516,514,514,513,513,512,512,	/Volumes/Promise RAID 2/Alf/for_Thea/experiments/quantification_test 5_3D9/str_data/PMA/120/3D9_PMA_120image_hoescht183.TIF 3D9_PMA_120image_568182.tif	1750	8,523	0	preAnalysis	none	none	120 PMA	qt_5_3D9_man03	/Volumes/Promise RAID/Alf/for_Thea/experiments/quantification_test 5_3D9/3D9_5
344	278	14,561	120	PMA	1256,1259,1259,1260,1260,1261,1261,1262,1262,1263,1263,1264,1264,1263,1263,1262,1262,1259,1259,1255,1255,1252,1252,1250,1250,1248,1248,1247,1247,1246,1246,1245,1245,1244,1244,1245,1245,1246,1246,1247,1247,1249,1249,1252,1252,1256,	518,518,519,519,520,520,522,522,523,523,525,525,531,531,534,534,535,535,536,536,535,535,534,534,533,533,531,531,530,530,529,529,525,525,524,524,522,522,521,521,519,519,518,518,517,517,	/Volumes/Promise RAID 2/Alf/for_Thea/experiments/quantification_test 5_3D9/str_data/PMA/120/3D9_PMA_120image_hoescht183.TIF 3D9_PMA_120image_568182.tif	1750	14,561	0	preAnalysis	none	none	120 PMA	qt_5_3D9_man03	/Volumes/Promise RAID/Alf/for_Thea/experiments/quantification_test 5_3D9/3D9_5
345	252	16,103	120	PMA	805,808,808,809,809,810,810,811,811,812,812,811,811,812,812,811,811,810,810,809,809,807,807,804,804,802,802,800,800,799,799,798,798,796,796,795,795,796,796,797,797,799,799,803,803,805,	524,524,526,526,527,527,528,528,531,531,532,532,533,533,537,537,540,540,541,541,542,542,543,543,542,542,541,541,540,540,538,538,536,536,535,535,527,527,526,526,525,525,524,524,523,523,	/Volumes/Promise RAID 2/Alf/for_Thea/experiments/quantification_test 5_3D9/str_data/PMA/120/3D9_PMA_120image_hoescht183.TIF 3D9_PMA_120image_568182.tif	1750	16,103	0	preAnalysis	none	none	120 PMA	qt_5_3D9_man03	/Volumes/Promise RAID/Alf/for_Thea/experiments/quantification_test 5_3D9/3D9_5
346	294	15,449	120	PMA	1199,1201,1201,1202,1202,1203,1203,1202,1202,1201,1201,1200,1200,1195,1195,1193,1193,1192,1192,1191,1191,1190,1190,1189,1189,1187,1187,1185,1185,1183,1183,1181,1181,1180,1180,1181,1181,1182,1182,1184,1184,1186,1186,1188,1188,1194,1194,1199,	559,559,560,560,561,561,567,567,568,568,569,569,570,570,571,571,572,572,574,574,575,575,576,576,577,577,578,578,577,577,576,576,568,568,567,567,565,565,563,563,561,561,560,560,559,559,558,558,	/Volumes/Promise RAID 2/Alf/for_Thea/experiments/quantification_test 5_3D9/str_data/PMA/120/3D9_PMA_120image_hoescht183.TIF 3D9_PMA_120image_568182.tif	1750	15,449	0	preAnalysis	none	none	120 PMA	qt_5_3D9_man03	/Volumes/Promise RAID/Alf/for_Thea/experiments/quantification_test 5_3D9/3D9_5
347	164	56,122	120	PMA	290,291,291,292,292,293,293,294,294,295,295,296,296,297,297,298,298,299,299,300,300,301,301,302,302,303,303,302,302,301,301,300,300,299,299,298,298,297,297,296,296,295,295,294,294,293,293,292,292,291,291,292,292,291,291,290,290,289,289,290,	593,593,598,598,606,606,614,614,618,618,624,624,627,627,631,631,634,634,638,638,643,643,645,645,657,657,660,660,661,661,660,660,653,653,650,650,645,645,638,638,634,634,628,628,624,624,621,621,617,617,614,614,612,612,601,601,593,593,591,591,	/Volumes/Promise RAID 2/Alf/for_Thea/experiments/quantification_test 5_3D9/str_data/PMA/120/3D9_PMA_120image_hoescht183.TIF 3D9_PMA_120image_568182.tif	1750	56,122	0	preAnalysis	none	none	120 PMA	qt_5_3D9_man03	/Volumes/Promise RAID/Alf/for_Thea/experiments/quantification_test 5_3D9/3D9_5
348	278	15,54	120	PMA	1242,1244,1244,1245,1245,1247,1247,1248,1248,1249,1249,1248,1248,1247,1247,1246,1246,1245,1245,1243,1243,1236,1236,1235,1235,1232,1232,1231,1231,1230,1230,1229,1229,1228,1228,1229,1229,1230,1230,1231,1231,1233,1233,1234,1234,1236,1236,1242,	599,599,600,600,601,601,602,602,604,604,609,609,611,611,612,612,613,613,614,614,615,615,616,616,615,615,614,614,613,613,612,612,610,610,609,609,604,604,603,603,601,601,600,600,599,599,598,598,	/Volumes/Promise RAID 2/Alf/for_Thea/experiments/quantification_test 5_3D9/str_data/PMA/120/3D9_PMA_120image_hoescht183.TIF 3D9_PMA_120image_568182.tif	1750	15,54	0	preAnalysis	none	none	120 PMA	qt_5_3D9_man03	/Volumes/Promise RAID/Alf/for_Thea/experiments/quantification_test 5_3D9/3D9_5
349	214	15,252	120	PMA	537,539,539,540,540,541,541,542,542,541,541,540,540,538,538,536,536,531,531,530,530,529,529,528,528,527,527,528,528,529,529,530,530,531,531,532,532,537,	601,601,602,602,603,603,605,605,612,612,615,615,616,616,617,617,618,618,617,617,616,616,615,615,614,614,608,608,605,605,603,603,602,602,601,601,600,600,	/Volumes/Promise RAID 2/Alf/for_Thea/experiments/quantification_test 5_3D9/str_data/PMA/120/3D9_PMA_120image_hoescht183.TIF 3D9_PMA_120image_568182.tif	1750	15,252	0	preAnalysis	none	none	120 PMA	qt_5_3D9_man03	/Volumes/Promise RAID/Alf/for_Thea/experiments/quantification_test 5_3D9/3D9_5
350	345	20,817	120	PMA	633,635,635,636,636,637,637,636,636,635,635,634,634,633,633,632,632,631,631,630,630,628,628,626,626,619,619,617,617,616,616,615,615,614,614,613,613,614,614,615,615,617,617,619,619,621,621,622,622,623,623,624,624,625,625,628,628,633,	618,618,619,619,621,621,627,627,629,629,631,631,632,632,633,633,634,634,635,635,636,636,637,637,638,638,637,637,636,636,635,635,634,634,631,631,630,630,627,627,625,625,624,624,623,623,622,622,621,621,620,620,619,619,618,618,617,617,	/Volumes/Promise RAID 2/Alf/for_Thea/experiments/quantification_test 5_3D9/str_data/PMA/120/3D9_PMA_120image_hoescht183.TIF 3D9_PMA_120image_568182.tif	1750	20,817	0	preAnalysis	none	none	120 PMA	qt_5_3D9_man03	/Volumes/Promise RAID/Alf/for_Thea/experiments/quantification_test 5_3D9/3D9_5
351	183	14,863	120	PMA	386,388,388,389,389,390,390,389,389,388,388,387,387,386,386,383,383,380,380,378,378,377,377,376,376,375,375,376,376,377,377,378,378,386,	620,620,621,621,622,622,628,628,630,630,631,631,632,632,633,633,634,634,633,633,632,632,631,631,630,630,622,622,621,621,620,620,619,619,	/Volumes/Promise RAID 2/Alf/for_Thea/experiments/quantification_test 5_3D9/str_data/PMA/120/3D9_PMA_120image_hoescht183.TIF 3D9_PMA_120image_568182.tif	1750	14,863	0	preAnalysis	none	none	120 PMA	qt_5_3D9_man03	/Volumes/Promise RAID/Alf/for_Thea/experiments/quantification_test 5_3D9/3D9_5
352	215	13,916	120	PMA	484,486,486,487,487,490,490,492,492,493,493,494,494,493,493,492,492,490,490,488,488,483,483,480,480,479,479,478,478,477,477,478,478,479,479,480,480,481,481,484,	623,623,624,624,625,625,626,626,627,627,629,629,633,633,635,635,637,637,638,638,639,639,638,638,637,637,636,636,634,634,628,628,625,625,624,624,623,623,622,622,	/Volumes/Promise RAID 2/Alf/for_Thea/experiments/quantification_test 5_3D9/str_data/PMA/120/3D9_PMA_120image_hoescht183.TIF 3D9_PMA_120image_568182.tif	1750	13,916	0	preAnalysis	none	none	120 PMA	qt_5_3D9_man03	/Volumes/Promise RAID/Alf/for_Thea/experiments/quantification_test 5_3D9/3D9_5
353	249	16,012	120	PMA	1054,1056,1056,1057,1057,1058,1058,1059,1059,1060,1060,1059,1059,1058,1058,1057,1057,1055,1055,1052,1052,1051,1051,1049,1049,1047,1047,1046,1046,1045,1045,1044,1044,1045,1045,1046,1046,1047,1047,1048,1048,1052,1052,1054,	623,623,624,624,625,625,626,626,633,633,634,634,637,637,639,639,641,641,642,642,643,643,642,642,641,641,640,640,639,639,636,636,628,628,626,626,625,625,624,624,623,623,622,622,	/Volumes/Promise RAID 2/Alf/for_Thea/experiments/quantification_test 5_3D9/str_data/PMA/120/3D9_PMA_120image_hoescht183.TIF 3D9_PMA_120image_568182.tif	1750	16,012	0	preAnalysis	none	none	120 PMA	qt_5_3D9_man03	/Volumes/Promise RAID/Alf/for_Thea/experiments/quantification_test 5_3D9/3D9_5
354	188	36,133	120	PMA	1026,1031,1031,1030,1030,1031,1031,1032,1032,1031,1031,1030,1030,1029,1029,1028,1028,1023,1023,1020,1020,1017,1017,1016,1016,1014,1014,1015,1015,1016,1016,1017,1017,1018,1018,1019,1019,1020,1020,1023,1023,1026,	643,643,644,644,646,646,648,648,650,650,651,651,654,654,656,656,657,657,656,656,655,655,654,654,653,653,650,650,649,649,647,647,646,646,645,645,644,644,643,643,642,642,	/Volumes/Promise RAID 2/Alf/for_Thea/experiments/quantification_test 5_3D9/str_data/PMA/120/3D9_PMA_120image_hoescht183.TIF 3D9_PMA_120image_568182.tif	1750	36,133	0	preAnalysis	none	none	120 PMA	qt_5_3D9_man03	/Volumes/Promise RAID/Alf/for_Thea/experiments/quantification_test 5_3D9/3D9_5
355	831	54,461	120	PMA	315,316,316,317,317,318,318,319,319,318,318,319,319,320,320,321,321,322,322,321,321,322,322,325,325,326,326,328,328,331,331,333,333,334,334,335,335,336,336,337,337,340,340,342,342,343,343,344,344,345,345,344,344,345,345,344,344,343,343,341,341,340,340,337,337,335,335,329,329,327,327,325,325,324,324,323,323,322,322,321,321,320,320,319,319,318,318,317,317,316,316,315,315,314,314,313,313,312,312,311…	655,655,659,659,658,658,660,660,661,661,662,662,664,664,666,666,669,669,673,673,674,674,680,680,679,679,678,678,679,679,678,678,679,679,680,680,681,681,683,683,686,686,687,687,688,688,690,690,693,693,702,702,703,703,704,704,706,706,707,707,708,708,709,709,710,710,711,711,710,710,709,709,707,707,705,705,701,701,698,698,689,689,686,686,684,684,682,682,680,680,677,677,676,676,674,674,672,672,671,671…	/Volumes/Promise RAID 2/Alf/for_Thea/experiments/quantification_test 5_3D9/str_data/PMA/120/3D9_PMA_120image_hoescht183.TIF 3D9_PMA_120image_568182.tif	1750	54,461	0	preAnalysis	none	none	120 PMA	qt_5_3D9_man03	/Volumes/Promise RAID/Alf/for_Thea/experiments/quantification_test 5_3D9/3D9_5
356	342	19,199	120	PMA	1327,1331,1331,1332,1332,1333,1333,1334,1334,1335,1335,1336,1336,1337,1337,1338,1338,1340,1340,1341,1341,1342,1342,1343,1343,1344,1344,1343,1343,1342,1342,1341,1341,1335,1335,1334,1334,1333,1333,1331,1331,1328,1328,1325,1325,1324,1324,1323,1323,1321,1321,1320,1320,1319,1319,1318,1318,1319,1319,1321,1321,1322,1322,1326,1326,1327,	659,659,660,660,661,661,662,662,664,664,666,666,667,667,666,666,667,667,668,668,669,669,670,670,671,671,676,676,678,678,679,679,680,680,679,679,678,678,677,677,676,676,675,675,674,674,673,673,672,672,670,670,669,669,668,668,663,663,661,661,660,660,659,659,658,658,	/Volumes/Promise RAID 2/Alf/for_Thea/experiments/quantification_test 5_3D9/str_data/PMA/120/3D9_PMA_120image_hoescht183.TIF 3D9_PMA_120image_568182.tif	1750	19,199	0	preAnalysis	none	none	120 PMA	qt_5_3D9_man03	/Volumes/Promise RAID/Alf/for_Thea/experiments/quantification_test 5_3D9/3D9_5
357	257	15,066	120	PMA	936,938,938,939,939,940,940,941,941,942,942,943,943,942,942,941,941,940,940,939,939,937,937,929,929,927,927,926,926,925,925,924,924,925,925,924,924,925,925,926,926,927,927,928,928,929,929,931,931,936,	670,670,671,671,672,672,674,674,676,676,679,679,680,680,682,682,684,684,685,685,686,686,687,687,686,686,685,685,683,683,682,682,679,679,678,678,676,676,674,674,673,673,672,672,671,671,670,670,669,669,	/Volumes/Promise RAID 2/Alf/for_Thea/experiments/quantification_test 5_3D9/str_data/PMA/120/3D9_PMA_120image_hoescht183.TIF 3D9_PMA_120image_568182.tif	1750	15,066	0	preAnalysis	none	none	120 PMA	qt_5_3D9_man03	/Volumes/Promise RAID/Alf/for_Thea/experiments/quantification_test 5_3D9/3D9_5
358	233	14,833	120	PMA	529,532,532,535,535,536,536,537,537,538,538,539,539,538,538,537,537,535,535,529,529,526,526,524,524,523,523,521,521,520,520,519,519,520,520,522,522,529,	674,674,675,675,676,676,677,677,678,678,679,679,685,685,686,686,687,687,688,688,687,687,686,686,685,685,684,684,683,683,682,682,675,675,674,674,673,673,	/Volumes/Promise RAID 2/Alf/for_Thea/experiments/quantification_test 5_3D9/str_data/PMA/120/3D9_PMA_120image_hoescht183.TIF 3D9_PMA_120image_568182.tif	1750	14,833	0	preAnalysis	none	none	120 PMA	qt_5_3D9_man03	/Volumes/Promise RAID/Alf/for_Thea/experiments/quantification_test 5_3D9/3D9_5
359	155	54,013	120	PMA	379,380,380,379,379,378,378,377,377,376,376,375,375,374,374,375,375,376,376,377,377,378,378,381,381,382,382,381,381,380,380,382,382,383,383,384,384,385,385,384,384,380,380,378,378,377,377,375,375,369,369,368,368,369,369,370,370,371,371,372,372,371,371,372,372,373,373,374,374,375,375,376,376,377,377,376,376,377,377,379,	686,686,697,697,699,699,700,700,703,703,705,705,708,708,713,713,714,714,716,716,717,717,718,718,717,717,707,707,703,703,702,702,704,704,705,705,716,716,719,719,720,720,719,719,718,718,717,717,716,716,715,715,714,714,713,713,711,711,709,709,708,708,707,707,705,705,704,704,703,703,700,700,695,695,692,692,690,690,685,685,	/Volumes/Promise RAID 2/Alf/for_Thea/experiments/quantification_test 5_3D9/str_data/PMA/120/3D9_PMA_120image_hoescht183.TIF 3D9_PMA_120image_568182.tif	1750	54,013	0	preAnalysis	none	none	120 PMA	qt_5_3D9_man03	/Volumes/Promise RAID/Alf/for_Thea/experiments/quantification_test 5_3D9/3D9_5
360	245	14,89	120	PMA	1209,1213,1213,1214,1214,1215,1215,1216,1216,1215,1215,1214,1214,1213,1213,1212,1212,1211,1211,1205,1205,1203,1203,1201,1201,1200,1200,1199,1199,1198,1198,1199,1199,1200,1200,1201,1201,1203,1203,1209,	694,694,695,695,696,696,698,698,705,705,706,706,707,707,708,708,709,709,710,710,709,709,708,708,707,707,705,705,703,703,697,697,696,696,695,695,694,694,693,693,	/Volumes/Promise RAID 2/Alf/for_Thea/experiments/quantification_test 5_3D9/str_data/PMA/120/3D9_PMA_120image_hoescht183.TIF 3D9_PMA_120image_568182.tif	1750	14,89	0	preAnalysis	none	none	120 PMA	qt_5_3D9_man03	/Volumes/Promise RAID/Alf/for_Thea/experiments/quantification_test 5_3D9/3D9_5
361	187	11,38	120	PMA	303,304,304,306,306,307,307,308,308,309,309,308,308,307,307,306,306,296,296,293,293,292,292,291,291,292,292,293,293,295,295,298,298,303,	704,704,705,705,706,706,707,707,709,709,712,712,714,714,715,715,716,716,715,715,714,714,713,713,707,707,706,706,705,705,704,704,703,703,	/Volumes/Promise RAID 2/Alf/for_Thea/experiments/quantification_test 5_3D9/str_data/PMA/120/3D9_PMA_120image_hoescht183.TIF 3D9_PMA_120image_568182.tif	1750	11,38	0	preAnalysis	none	none	120 PMA	qt_5_3D9_man03	/Volumes/Promise RAID/Alf/for_Thea/experiments/quantification_test 5_3D9/3D9_5
362	246	15,833	120	PMA	638,639,639,640,640,641,641,642,642,641,641,640,640,639,639,638,638,635,635,630,630,628,628,627,627,626,626,625,625,626,626,627,627,628,628,629,629,630,630,631,631,632,632,638,	720,720,721,721,722,722,724,724,732,732,734,734,735,735,736,736,737,737,738,738,737,737,736,736,735,735,734,734,728,728,727,727,726,726,725,725,723,723,721,721,720,720,719,719,	/Volumes/Promise RAID 2/Alf/for_Thea/experiments/quantification_test 5_3D9/str_data/PMA/120/3D9_PMA_120image_hoescht183.TIF 3D9_PMA_120image_568182.tif	1750	15,833	0	preAnalysis	none	none	120 PMA	qt_5_3D9_man03	/Volumes/Promise RAID/Alf/for_Thea/experiments/quantification_test 5_3D9/3D9_5
363	188	14,298	120	PMA	161,164,164,165,165,166,166,165,165,164,164,162,162,158,158,157,157,156,156,155,155,152,152,147,147,146,146,145,145,146,146,147,147,148,148,149,149,151,151,153,153,156,156,161,	726,726,727,727,728,728,731,731,732,732,733,733,734,734,735,735,736,736,737,737,738,738,739,739,738,738,737,737,733,733,731,731,730,730,729,729,728,728,727,727,726,726,725,725,	/Volumes/Promise RAID 2/Alf/for_Thea/experiments/quantification_test 5_3D9/str_data/PMA/120/3D9_PMA_120image_hoescht183.TIF 3D9_PMA_120image_568182.tif	1750	14,298	0	preAnalysis	none	none	120 PMA	qt_5_3D9_man03	/Volumes/Promise RAID/Alf/for_Thea/experiments/quantification_test 5_3D9/3D9_5
364	252	14,413	120	PMA	1330,1331,1331,1332,1332,1333,1333,1332,1332,1331,1331,1330,1330,1329,1329,1327,1327,1320,1320,1319,1319,1318,1318,1317,1317,1316,1316,1315,1315,1316,1316,1318,1318,1319,1319,1320,1320,1321,1321,1322,1322,1330,	727,727,729,729,734,734,737,737,740,740,742,742,743,743,744,744,745,745,744,744,743,743,742,742,741,741,739,739,738,738,735,735,732,732,729,729,728,728,727,727,726,726,	/Volumes/Promise RAID 2/Alf/for_Thea/experiments/quantification_test 5_3D9/str_data/PMA/120/3D9_PMA_120image_hoescht183.TIF 3D9_PMA_120image_568182.tif	1750	14,413	0	preAnalysis	none	none	120 PMA	qt_5_3D9_man03	/Volumes/Promise RAID/Alf/for_Thea/experiments/quantification_test 5_3D9/3D9_5
365	241	15,867	120	PMA	927,929,929,930,930,932,932,933,933,934,934,933,933,932,932,930,930,928,928,923,923,922,922,921,921,920,920,919,919,918,918,917,917,918,918,919,919,921,921,927,	729,729,730,730,731,731,732,732,734,734,741,741,743,743,744,744,745,745,746,746,745,745,744,744,743,743,742,742,741,741,739,739,732,732,731,731,729,729,728,728,	/Volumes/Promise RAID 2/Alf/for_Thea/experiments/quantification_test 5_3D9/str_data/PMA/120/3D9_PMA_120image_hoescht183.TIF 3D9_PMA_120image_568182.tif	1750	15,867	0	preAnalysis	none	none	120 PMA	qt_5_3D9_man03	/Volumes/Promise RAID/Alf/for_Thea/experiments/quantification_test 5_3D9/3D9_5
366	173	5,087	120	PMA	74,75,75,76,76,78,78,79,79,78,78,77,77,72,72,70,70,69,69,68,68,67,67,66,66,65,65,66,66,67,67,68,68,69,69,74,	732,732,734,734,741,741,742,742,747,747,748,748,749,749,748,748,747,747,746,746,745,745,742,742,738,738,737,737,734,734,733,733,732,732,731,731,	/Volumes/Promise RAID 2/Alf/for_Thea/experiments/quantification_test 5_3D9/str_data/PMA/120/3D9_PMA_120image_hoescht183.TIF 3D9_PMA_120image_568182.tif	1750	5,087	0	preAnalysis	none	none	120 PMA	qt_5_3D9_man03	/Volumes/Promise RAID/Alf/for_Thea/experiments/quantification_test 5_3D9/3D9_5
367	174	8,644	120	PMA	189,191,191,192,192,191,191,189,189,188,188,189,189,190,190,191,191,190,190,189,189,183,183,182,182,181,181,180,180,179,179,180,180,181,181,182,182,183,183,185,185,189,	732,732,734,734,737,737,738,738,739,739,741,741,742,742,743,743,747,747,748,748,749,749,748,748,747,747,746,746,743,743,737,737,735,735,734,734,733,733,732,732,731,731,	/Volumes/Promise RAID 2/Alf/for_Thea/experiments/quantification_test 5_3D9/str_data/PMA/120/3D9_PMA_120image_hoescht183.TIF 3D9_PMA_120image_568182.tif	1750	8,644	0	preAnalysis	none	none	120 PMA	qt_5_3D9_man03	/Volumes/Promise RAID/Alf/for_Thea/experiments/quantification_test 5_3D9/3D9_5
368	255	15,247	120	PMA	1017,1021,1021,1022,1022,1023,1023,1024,1024,1025,1025,1024,1024,1023,1023,1022,1022,1021,1021,1020,1020,1011,1011,1009,1009,1008,1008,1007,1007,1006,1006,1005,1005,1006,1006,1007,1007,1009,1009,1012,1012,1016,1016,1017,	736,736,737,737,738,738,740,740,742,742,744,744,747,747,749,749,750,750,751,751,752,752,751,751,750,750,749,749,748,748,745,745,741,741,740,740,738,738,737,737,736,736,735,735,	/Volumes/Promise RAID 2/Alf/for_Thea/experiments/quantification_test 5_3D9/str_data/PMA/120/3D9_PMA_120image_hoescht183.TIF 3D9_PMA_120image_568182.tif	1750	15,247	0	preAnalysis	none	none	120 PMA	qt_5_3D9_man03	/Volumes/Promise RAID/Alf/for_Thea/experiments/quantification_test 5_3D9/3D9_5
369	214	14,206	120	PMA	598,602,602,606,606,607,607,608,608,609,609,608,608,607,607,606,606,602,602,598,598,596,596,594,594,593,593,592,592,591,591,590,590,591,591,592,592,594,594,598,	764,764,765,765,766,766,767,767,768,768,772,772,775,775,776,776,777,777,778,778,777,777,776,776,775,775,774,774,773,773,772,772,767,767,765,765,764,764,763,763,	/Volumes/Promise RAID 2/Alf/for_Thea/experiments/quantification_test 5_3D9/str_data/PMA/120/3D9_PMA_120image_hoescht183.TIF 3D9_PMA_120image_568182.tif	1750	14,206	0	preAnalysis	none	none	120 PMA	qt_5_3D9_man03	/Volumes/Promise RAID/Alf/for_Thea/experiments/quantification_test 5_3D9/3D9_5
370	235	15,728	120	PMA	797,799,799,800,800,801,801,802,802,801,801,800,800,799,799,798,798,797,797,795,795,789,789,788,788,787,787,786,786,785,785,786,786,787,787,788,788,789,789,790,790,797,	764,764,766,766,767,767,770,770,773,773,776,776,777,777,778,778,779,779,780,780,781,781,780,780,779,779,778,778,776,776,771,771,768,768,767,767,765,765,764,764,763,763,	/Volumes/Promise RAID 2/Alf/for_Thea/experiments/quantification_test 5_3D9/str_data/PMA/120/3D9_PMA_120image_hoescht183.TIF 3D9_PMA_120image_568182.tif	1750	15,728	0	preAnalysis	none	none	120 PMA	qt_5_3D9_man03	/Volumes/Promise RAID/Alf/for_Thea/experiments/quantification_test 5_3D9/3D9_5
371	276	15,246	120	PMA	1076,1078,1078,1079,1079,1080,1080,1079,1079,1078,1078,1077,1077,1075,1075,1073,1073,1072,1072,1070,1070,1068,1068,1064,1064,1062,1062,1061,1061,1060,1060,1061,1061,1062,1062,1063,1063,1064,1064,1066,1066,1069,1069,1073,1073,1076,	764,764,765,765,767,767,773,773,775,775,776,776,777,777,778,778,779,779,780,780,781,781,782,782,781,781,780,780,778,778,771,771,769,769,768,768,767,767,766,766,765,765,764,764,763,763,	/Volumes/Promise RAID 2/Alf/for_Thea/experiments/quantification_test 5_3D9/str_data/PMA/120/3D9_PMA_120image_hoescht183.TIF 3D9_PMA_120image_568182.tif	1750	15,246	0	preAnalysis	none	none	120 PMA	qt_5_3D9_man03	/Volumes/Promise RAID/Alf/for_Thea/experiments/quantification_test 5_3D9/3D9_5
372	262	14,901	120	PMA	1244,1245,1245,1247,1247,1248,1248,1247,1247,1246,1246,1245,1245,1243,1243,1240,1240,1236,1236,1233,1233,1232,1232,1231,1231,1230,1230,1229,1229,1230,1230,1231,1231,1232,1232,1233,1233,1244,	774,774,775,775,777,777,784,784,786,786,787,787,788,788,789,789,790,790,789,789,788,788,787,787,786,786,783,783,780,780,776,776,775,775,774,774,773,773,	/Volumes/Promise RAID 2/Alf/for_Thea/experiments/quantification_test 5_3D9/str_data/PMA/120/3D9_PMA_120image_hoescht183.TIF 3D9_PMA_120image_568182.tif	1750	14,901	0	preAnalysis	none	none	120 PMA	qt_5_3D9_man03	/Volumes/Promise RAID/Alf/for_Thea/experiments/quantification_test 5_3D9/3D9_5
373	182	11,341	120	PMA	325,326,326,327,327,328,328,329,329,330,330,331,331,332,332,331,331,330,330,329,329,327,327,322,322,320,320,319,319,318,318,317,317,318,318,319,319,320,320,321,321,325,	778,778,779,779,781,781,782,782,783,783,784,784,787,787,789,789,791,791,792,792,793,793,794,794,793,793,792,792,790,790,787,787,782,782,780,780,779,779,778,778,777,777,	/Volumes/Promise RAID 2/Alf/for_Thea/experiments/quantification_test 5_3D9/str_data/PMA/120/3D9_PMA_120image_hoescht183.TIF 3D9_PMA_120image_568182.tif	1750	11,341	0	preAnalysis	none	none	120 PMA	qt_5_3D9_man03	/Volumes/Promise RAID/Alf/for_Thea/experiments/quantification_test 5_3D9/3D9_5
374	277	14,383	120	PMA	1334,1335,1335,1336,1336,1337,1337,1338,1338,1339,1339,1337,1337,1336,1336,1334,1334,1332,1332,1328,1328,1326,1326,1323,1323,1316,1316,1315,1315,1314,1314,1315,1315,1316,1316,1320,1320,1322,1322,1323,1323,1324,1324,1325,1325,1326,1326,1328,1328,1334,	778,778,779,779,780,780,781,781,783,783,790,790,791,791,792,792,793,793,792,792,791,791,790,790,791,791,789,789,788,788,784,784,783,783,782,782,781,781,782,782,781,781,780,780,779,779,778,778,777,777,	/Volumes/Promise RAID 2/Alf/for_Thea/experiments/quantification_test 5_3D9/str_data/PMA/120/3D9_PMA_120image_hoescht183.TIF 3D9_PMA_120image_568182.tif	1750	14,383	0	preAnalysis	none	none	120 PMA	qt_5_3D9_man03	/Volumes/Promise RAID/Alf/for_Thea/experiments/quantification_test 5_3D9/3D9_5
375	224	16,366	120	PMA	686,690,690,691,691,692,692,693,693,694,694,695,695,694,694,695,695,694,694,693,693,692,692,691,691,687,687,686,686,684,684,682,682,681,681,680,680,679,679,680,680,681,681,684,684,686,	794,794,795,795,796,796,797,797,798,798,803,803,804,804,805,805,806,806,808,808,809,809,810,810,811,811,812,812,811,811,810,810,808,808,806,806,805,805,797,797,795,795,794,794,793,793,	/Volumes/Promise RAID 2/Alf/for_Thea/experiments/quantification_test 5_3D9/str_data/PMA/120/3D9_PMA_120image_hoescht183.TIF 3D9_PMA_120image_568182.tif	1750	16,366	0	preAnalysis	none	none	120 PMA	qt_5_3D9_man03	/Volumes/Promise RAID/Alf/for_Thea/experiments/quantification_test 5_3D9/3D9_5
376	206	15,592	120	PMA	495,505,505,506,506,507,507,508,508,507,507,506,506,505,505,504,504,502,502,495,495,494,494,493,493,492,492,491,491,490,490,489,489,488,488,489,489,490,490,492,492,495,	798,798,799,799,800,800,803,803,804,804,807,807,808,808,809,809,810,810,811,811,810,810,809,809,808,808,807,807,806,806,805,805,804,804,800,800,799,799,798,798,797,797,	/Volumes/Promise RAID 2/Alf/for_Thea/experiments/quantification_test 5_3D9/str_data/PMA/120/3D9_PMA_120image_hoescht183.TIF 3D9_PMA_120image_568182.tif	1750	15,592	0	preAnalysis	none	none	120 PMA	qt_5_3D9_man03	/Volumes/Promise RAID/Alf/for_Thea/experiments/quantification_test 5_3D9/3D9_5
377	202	13,386	120	PMA	439,440,440,441,441,442,442,443,443,442,442,441,441,440,440,438,438,437,437,432,432,431,431,430,430,429,429,430,430,431,431,432,432,433,433,439,	799,799,800,800,801,801,802,802,810,810,812,812,813,813,814,814,815,815,816,816,815,815,814,814,813,813,807,807,802,802,800,800,799,799,798,798,	/Volumes/Promise RAID 2/Alf/for_Thea/experiments/quantification_test 5_3D9/str_data/PMA/120/3D9_PMA_120image_hoescht183.TIF 3D9_PMA_120image_568182.tif	1750	13,386	0	preAnalysis	none	none	120 PMA	qt_5_3D9_man03	/Volumes/Promise RAID/Alf/for_Thea/experiments/quantification_test 5_3D9/3D9_5
378	273	14,418	120	PMA	1302,1303,1303,1304,1304,1305,1305,1306,1306,1305,1305,1304,1304,1303,1303,1302,1302,1300,1300,1298,1298,1297,1297,1293,1293,1292,1292,1290,1290,1289,1289,1290,1290,1291,1291,1292,1292,1293,1293,1294,1294,1296,1296,1302,	800,800,801,801,802,802,804,804,812,812,814,814,816,816,818,818,819,819,820,820,821,821,820,820,819,819,818,818,815,815,812,812,811,811,809,809,802,802,801,801,800,800,799,799,	/Volumes/Promise RAID 2/Alf/for_Thea/experiments/quantification_test 5_3D9/str_data/PMA/120/3D9_PMA_120image_hoescht183.TIF 3D9_PMA_120image_568182.tif	1750	14,418	0	preAnalysis	none	none	120 PMA	qt_5_3D9_man03	/Volumes/Promise RAID/Alf/for_Thea/experiments/quantification_test 5_3D9/3D9_5
379	278	15,565	120	PMA	1183,1185,1185,1186,1186,1187,1187,1188,1188,1189,1189,1188,1188,1187,1187,1186,1186,1185,1185,1184,1184,1182,1182,1177,1177,1176,1176,1174,1174,1173,1173,1172,1172,1171,1171,1170,1170,1169,1169,1170,1170,1171,1171,1173,1173,1176,1176,1177,1177,1178,1178,1183,	845,845,846,846,847,847,849,849,853,853,854,854,857,857,859,859,860,860,861,861,862,862,863,863,862,862,863,863,862,862,861,861,860,860,858,858,855,855,854,854,849,849,848,848,847,847,846,846,845,845,844,844,	/Volumes/Promise RAID 2/Alf/for_Thea/experiments/quantification_test 5_3D9/str_data/PMA/120/3D9_PMA_120image_hoescht183.TIF 3D9_PMA_120image_568182.tif	1750	15,565	0	preAnalysis	none	none	120 PMA	qt_5_3D9_man03	/Volumes/Promise RAID/Alf/for_Thea/experiments/quantification_test 5_3D9/3D9_5
380	168	8,857	120	PMA	302,303,303,304,304,305,305,304,304,305,305,304,304,303,303,302,302,299,299,298,298,295,295,294,294,293,293,292,292,291,291,292,292,293,293,295,295,298,298,302,	850,850,851,851,852,852,856,856,858,858,861,861,862,862,863,863,864,864,865,865,864,864,863,863,862,862,861,861,858,858,855,855,853,853,851,851,850,850,849,849,	/Volumes/Promise RAID 2/Alf/for_Thea/experiments/quantification_test 5_3D9/str_data/PMA/120/3D9_PMA_120image_hoescht183.TIF 3D9_PMA_120image_568182.tif	1750	8,857	0	preAnalysis	none	none	120 PMA	qt_5_3D9_man03	/Volumes/Promise RAID/Alf/for_Thea/experiments/quantification_test 5_3D9/3D9_5
381	216	13,481	120	PMA	514,515,515,516,516,517,517,518,518,519,519,520,520,521,521,520,520,518,518,517,517,508,508,507,507,506,506,505,505,504,504,505,505,506,506,507,507,509,509,514,	856,856,857,857,860,860,861,861,862,862,863,863,864,864,868,868,870,870,871,871,872,872,871,871,870,870,869,869,867,867,861,861,859,859,858,858,856,856,855,855,	/Volumes/Promise RAID 2/Alf/for_Thea/experiments/quantification_test 5_3D9/str_data/PMA/120/3D9_PMA_120image_hoescht183.TIF 3D9_PMA_120image_568182.tif	1750	13,481	0	preAnalysis	none	none	120 PMA	qt_5_3D9_man03	/Volumes/Promise RAID/Alf/for_Thea/experiments/quantification_test 5_3D9/3D9_5
382	166	9,157	120	PMA	110,111,111,112,112,113,113,112,112,111,111,109,109,101,101,100,100,98,98,97,97,98,98,99,99,110,	859,859,860,860,861,861,866,866,868,868,869,869,870,870,869,869,868,868,866,866,860,860,859,859,858,858,	/Volumes/Promise RAID 2/Alf/for_Thea/experiments/quantification_test 5_3D9/str_data/PMA/120/3D9_PMA_120image_hoescht183.TIF 3D9_PMA_120image_568182.tif	1750	9,157	0	preAnalysis	none	none	120 PMA	qt_5_3D9_man03	/Volumes/Promise RAID/Alf/for_Thea/experiments/quantification_test 5_3D9/3D9_5
383	175	16,36	120	PMA	406,408,408,410,410,409,409,408,408,407,407,406,406,405,405,404,404,403,403,402,402,400,400,399,399,397,397,396,396,395,395,396,396,398,398,405,405,406,	869,869,870,870,876,876,877,877,878,878,879,879,880,880,881,881,882,882,883,883,884,884,885,885,883,883,882,882,879,879,872,872,870,870,869,869,868,868,	/Volumes/Promise RAID 2/Alf/for_Thea/experiments/quantification_test 5_3D9/str_data/PMA/120/3D9_PMA_120image_hoescht183.TIF 3D9_PMA_120image_568182.tif	1750	16,36	0	preAnalysis	none	none	120 PMA	qt_5_3D9_man03	/Volumes/Promise RAID/Alf/for_Thea/experiments/quantification_test 5_3D9/3D9_5
384	165	9,503	120	PMA	151,152,152,153,153,154,154,155,155,154,154,153,153,152,152,149,149,147,147,144,144,142,142,141,141,142,142,143,143,144,144,145,145,146,146,151,	879,879,880,880,881,881,882,882,889,889,891,891,892,892,893,893,894,894,893,893,892,892,890,890,886,886,885,885,884,884,881,881,879,879,878,878,	/Volumes/Promise RAID 2/Alf/for_Thea/experiments/quantification_test 5_3D9/str_data/PMA/120/3D9_PMA_120image_hoescht183.TIF 3D9_PMA_120image_568182.tif	1750	9,503	0	preAnalysis	none	none	120 PMA	qt_5_3D9_man03	/Volumes/Promise RAID/Alf/for_Thea/experiments/quantification_test 5_3D9/3D9_5
385	245	14,955	120	PMA	973,975,975,976,976,977,977,978,978,979,979,978,978,977,977,976,976,975,975,968,968,967,967,966,966,965,965,964,964,963,963,964,964,965,965,966,966,967,967,973,	893,893,894,894,896,896,897,897,899,899,906,906,908,908,909,909,910,910,911,911,910,910,909,909,908,908,907,907,904,904,897,897,895,895,894,894,893,893,892,892,	/Volumes/Promise RAID 2/Alf/for_Thea/experiments/quantification_test 5_3D9/str_data/PMA/120/3D9_PMA_120image_hoescht183.TIF 3D9_PMA_120image_568182.tif	1750	14,955	0	preAnalysis	none	none	120 PMA	qt_5_3D9_man03	/Volumes/Promise RAID/Alf/for_Thea/experiments/quantification_test 5_3D9/3D9_5
386	252	15,429	120	PMA	757,759,759,761,761,762,762,763,763,764,764,765,765,766,766,765,765,764,764,763,763,756,756,754,754,752,752,750,750,749,749,748,748,747,747,748,748,749,749,751,751,753,753,757,	899,899,900,900,901,901,903,903,905,905,906,906,909,909,912,912,914,914,915,915,916,916,915,915,914,914,913,913,912,912,911,911,908,908,903,903,901,901,900,900,899,899,898,898,	/Volumes/Promise RAID 2/Alf/for_Thea/experiments/quantification_test 5_3D9/str_data/PMA/120/3D9_PMA_120image_hoescht183.TIF 3D9_PMA_120image_568182.tif	1750	15,429	0	preAnalysis	none	none	120 PMA	qt_5_3D9_man03	/Volumes/Promise RAID/Alf/for_Thea/experiments/quantification_test 5_3D9/3D9_5
387	187	10,182	120	PMA	400,402,402,403,403,404,404,405,405,406,406,405,405,404,404,403,403,402,402,400,400,393,393,392,392,391,391,390,390,391,391,392,392,393,393,394,394,396,396,400,	906,906,907,907,908,908,909,909,911,911,914,914,916,916,917,917,919,919,920,920,921,921,920,920,919,919,916,916,914,914,911,911,910,910,907,907,906,906,905,905,	/Volumes/Promise RAID 2/Alf/for_Thea/experiments/quantification_test 5_3D9/str_data/PMA/120/3D9_PMA_120image_hoescht183.TIF 3D9_PMA_120image_568182.tif	1750	10,182	0	preAnalysis	none	none	120 PMA	qt_5_3D9_man03	/Volumes/Promise RAID/Alf/for_Thea/experiments/quantification_test 5_3D9/3D9_5
388	182	14,242	120	PMA	499,500,500,501,501,502,502,503,503,502,502,503,503,502,502,501,501,500,500,498,498,497,497,492,492,490,490,489,489,488,488,489,489,488,488,489,489,490,490,491,491,492,492,499,	917,917,918,918,919,919,921,921,922,922,925,925,926,926,928,928,929,929,930,930,931,931,932,932,931,931,929,929,927,927,926,926,925,925,924,924,920,920,918,918,917,917,916,916,	/Volumes/Promise RAID 2/Alf/for_Thea/experiments/quantification_test 5_3D9/str_data/PMA/120/3D9_PMA_120image_hoescht183.TIF 3D9_PMA_120image_568182.tif	1750	14,242	0	preAnalysis	none	none	120 PMA	qt_5_3D9_man03	/Volumes/Promise RAID/Alf/for_Thea/experiments/quantification_test 5_3D9/3D9_5
389	209	13,78	120	PMA	553,554,554,555,555,556,556,557,557,558,558,557,557,556,556,555,555,553,553,551,551,548,548,545,545,544,544,543,543,542,542,543,543,544,544,545,545,546,546,548,548,553,	929,929,930,930,931,931,933,933,935,935,938,938,942,942,943,943,944,944,945,945,946,946,945,945,944,944,943,943,941,941,938,938,935,935,933,933,931,931,929,929,928,928,	/Volumes/Promise RAID 2/Alf/for_Thea/experiments/quantification_test 5_3D9/str_data/PMA/120/3D9_PMA_120image_hoescht183.TIF 3D9_PMA_120image_568182.tif	1750	13,78	0	preAnalysis	none	none	120 PMA	qt_5_3D9_man03	/Volumes/Promise RAID/Alf/for_Thea/experiments/quantification_test 5_3D9/3D9_5
390	276	14,609	120	PMA	1034,1036,1036,1037,1037,1038,1038,1039,1039,1038,1038,1039,1039,1038,1038,1037,1037,1035,1035,1034,1034,1029,1029,1028,1028,1027,1027,1026,1026,1025,1025,1024,1024,1023,1023,1024,1024,1023,1023,1024,1024,1025,1025,1026,1026,1027,1027,1029,1029,1034,	959,959,960,960,961,961,962,962,970,970,971,971,973,973,978,978,979,979,980,980,979,979,978,978,977,977,976,976,975,975,973,973,971,971,970,970,969,969,964,964,962,962,961,961,960,960,959,959,958,958,	/Volumes/Promise RAID 2/Alf/for_Thea/experiments/quantification_test 5_3D9/str_data/PMA/120/3D9_PMA_120image_hoescht183.TIF 3D9_PMA_120image_568182.tif	1750	14,609	0	preAnalysis	none	none	120 PMA	qt_5_3D9_man03	/Volumes/Promise RAID/Alf/for_Thea/experiments/quantification_test 5_3D9/3D9_5
391	217	14,917	120	PMA	648,650,650,651,651,652,652,653,653,654,654,653,653,652,652,651,651,649,649,644,644,642,642,641,641,640,640,639,639,640,640,639,639,640,640,641,641,642,642,644,644,648,	995,995,996,996,997,997,999,999,1003,1003,1006,1006,1009,1009,1011,1011,1012,1012,1013,1013,1012,1012,1011,1011,1009,1009,1008,1008,1007,1007,1003,1003,1001,1001,998,998,996,996,995,995,994,994,	/Volumes/Promise RAID 2/Alf/for_Thea/experiments/quantification_test 5_3D9/str_data/PMA/120/3D9_PMA_120image_hoescht183.TIF 3D9_PMA_120image_568182.tif	1750	14,917	0	preAnalysis	none	none	120 PMA	qt_5_3D9_man03	/Volumes/Promise RAID/Alf/for_Thea/experiments/quantification_test 5_3D9/3D9_5
392	268	15,403	120	PMA	1194,1195,1195,1196,1196,1197,1197,1198,1198,1199,1199,1201,1201,1202,1202,1201,1201,1200,1200,1199,1199,1197,1197,1195,1195,1194,1194,1193,1193,1191,1191,1190,1190,1188,1188,1187,1187,1186,1186,1185,1185,1184,1184,1185,1185,1184,1184,1185,1185,1186,1186,1187,1187,1194,	1001,1001,1002,1002,1003,1003,1005,1005,1006,1006,1008,1008,1009,1009,1016,1016,1018,1018,1019,1019,1020,1020,1021,1021,1020,1020,1021,1021,1020,1020,1018,1018,1017,1017,1016,1016,1015,1015,1012,1012,1009,1009,1008,1008,1007,1007,1006,1006,1002,1002,1001,1001,1000,1000,	/Volumes/Promise RAID 2/Alf/for_Thea/experiments/quantification_test 5_3D9/str_data/PMA/120/3D9_PMA_120image_hoescht183.TIF 3D9_PMA_120image_568182.tif	1750	15,403	0	preAnalysis	none	none	120 PMA	qt_5_3D9_man03	/Volumes/Promise RAID/Alf/for_Thea/experiments/quantification_test 5_3D9/3D9_5
393	267	14,562	120	PMA	1137,1139,1139,1140,1140,1141,1141,1142,1142,1141,1141,1140,1140,1139,1139,1138,1138,1136,1136,1133,1133,1129,1129,1128,1128,1127,1127,1126,1126,1127,1127,1128,1128,1129,1129,1130,1130,1131,1131,1137,	1003,1003,1004,1004,1005,1005,1007,1007,1017,1017,1019,1019,1020,1020,1021,1021,1022,1022,1023,1023,1022,1022,1021,1021,1020,1020,1018,1018,1012,1012,1010,1010,1007,1007,1004,1004,1003,1003,1002,1002,	/Volumes/Promise RAID 2/Alf/for_Thea/experiments/quantification_test 5_3D9/str_data/PMA/120/3D9_PMA_120image_hoescht183.TIF 3D9_PMA_120image_568182.tif	1750	14,562	0	preAnalysis	none	none	120 PMA	qt_5_3D9_man03	/Volumes/Promise RAID/Alf/for_Thea/experiments/quantification_test 5_3D9/3D9_5
394	148	1,838	120	PMA	51,52,52,54,54,55,55,54,54,53,53,52,52,49,49,48,48,42,42,41,41,40,40,41,41,42,42,43,43,46,46,51,	1008,1008,1009,1009,1011,1011,1014,1014,1016,1016,1017,1017,1018,1018,1019,1019,1020,1020,1019,1019,1017,1017,1013,1013,1010,1010,1009,1009,1008,1008,1007,1007,	/Volumes/Promise RAID 2/Alf/for_Thea/experiments/quantification_test 5_3D9/str_data/PMA/120/3D9_PMA_120image_hoescht183.TIF 3D9_PMA_120image_568182.tif	1750	1,838	0	preAnalysis	none	none	120 PMA	qt_5_3D9_man03	/Volumes/Promise RAID/Alf/for_Thea/experiments/quantification_test 5_3D9/3D9_5
395	172	4,372	120	PMA	250,253,253,254,254,255,255,256,256,255,255,254,254,250,250,249,249,248,248,243,243,241,241,240,240,241,241,242,242,243,243,245,245,247,247,250,	3,3,4,4,5,5,6,6,11,11,12,12,13,13,15,15,16,16,17,17,16,16,15,15,9,9,7,7,6,6,4,4,3,3,2,2,	/Volumes/Promise RAID 2/Alf/for_Thea/experiments/quantification_test 5_3D9/str_data/PMA/120/3D9_PMA_120image_hoescht187.TIF 3D9_PMA_120image_568186.tif	1750	4,372	0	preAnalysis	none	none	120 PMA	qt_5_3D9_man03	/Volumes/Promise RAID/Alf/for_Thea/experiments/quantification_test 5_3D9/3D9_5
396	221	6,95	120	PMA	1319,1320,1320,1321,1321,1322,1322,1323,1323,1324,1324,1325,1325,1324,1324,1323,1323,1322,1322,1321,1321,1314,1314,1313,1313,1312,1312,1311,1311,1310,1310,1309,1309,1308,1308,1309,1309,1310,1310,1311,1311,1313,1313,1319,	6,6,7,7,8,8,9,9,10,10,12,12,17,17,19,19,20,20,21,21,22,22,21,21,20,20,19,19,18,18,17,17,15,15,11,11,8,8,7,7,6,6,5,5,	/Volumes/Promise RAID 2/Alf/for_Thea/experiments/quantification_test 5_3D9/str_data/PMA/120/3D9_PMA_120image_hoescht187.TIF 3D9_PMA_120image_568186.tif	1750	6,95	0	preAnalysis	none	none	120 PMA	qt_5_3D9_man03	/Volumes/Promise RAID/Alf/for_Thea/experiments/quantification_test 5_3D9/3D9_5
397	250	7,424	120	PMA	1094,1096,1096,1097,1097,1098,1098,1099,1099,1100,1100,1099,1099,1098,1098,1097,1097,1094,1094,1091,1091,1090,1090,1088,1088,1086,1086,1084,1084,1083,1083,1082,1082,1081,1081,1082,1082,1083,1083,1085,1085,1086,1086,1090,1090,1094,	13,13,14,14,15,15,16,16,19,19,24,24,27,27,28,28,29,29,30,30,29,29,28,28,27,27,26,26,25,25,24,24,22,22,18,18,16,16,15,15,14,14,13,13,12,12,	/Volumes/Promise RAID 2/Alf/for_Thea/experiments/quantification_test 5_3D9/str_data/PMA/120/3D9_PMA_120image_hoescht187.TIF 3D9_PMA_120image_568186.tif	1750	7,424	0	preAnalysis	none	none	120 PMA	qt_5_3D9_man03	/Volumes/Promise RAID/Alf/for_Thea/experiments/quantification_test 5_3D9/3D9_5
398	226	13,978	120	PMA	790,791,791,792,792,793,793,794,794,793,793,792,792,791,791,790,790,789,789,788,788,783,783,781,781,780,780,779,779,778,778,779,779,780,780,781,781,782,782,785,785,790,	16,16,17,17,19,19,20,20,21,21,24,24,30,30,31,31,32,32,33,33,34,34,33,33,32,32,30,30,28,28,22,22,19,19,18,18,17,17,16,16,15,15,	/Volumes/Promise RAID 2/Alf/for_Thea/experiments/quantification_test 5_3D9/str_data/PMA/120/3D9_PMA_120image_hoescht187.TIF 3D9_PMA_120image_568186.tif	1750	13,978	0	preAnalysis	none	none	120 PMA	qt_5_3D9_man03	/Volumes/Promise RAID/Alf/for_Thea/experiments/quantification_test 5_3D9/3D9_5
399	160	12,1	120	PMA	383,384,384,385,385,384,384,383,383,382,382,381,381,375,375,373,373,372,372,373,373,374,374,376,376,378,378,383,	60,60,62,62,69,69,71,71,72,72,73,73,74,74,73,73,71,71,64,64,63,63,61,61,60,60,59,59,	/Volumes/Promise RAID 2/Alf/for_Thea/experiments/quantification_test 5_3D9/str_data/PMA/120/3D9_PMA_120image_hoescht187.TIF 3D9_PMA_120image_568186.tif	1750	12,1	0	preAnalysis	none	none	120 PMA	qt_5_3D9_man03	/Volumes/Promise RAID/Alf/for_Thea/experiments/quantification_test 5_3D9/3D9_5
400	216	8,37	120	PMA	725,726,726,728,728,729,729,730,730,729,729,728,728,727,727,726,726,723,723,720,720,717,717,716,716,715,715,714,714,715,715,716,716,718,718,725,	67,67,68,68,70,70,74,74,76,76,79,79,80,80,81,81,82,82,83,83,82,82,81,81,80,80,79,79,70,70,68,68,67,67,66,66,	/Volumes/Promise RAID 2/Alf/for_Thea/experiments/quantification_test 5_3D9/str_data/PMA/120/3D9_PMA_120image_hoescht187.TIF 3D9_PMA_120image_568186.tif	1750	8,37	0	preAnalysis	none	none	120 PMA	qt_5_3D9_man03	/Volumes/Promise RAID/Alf/for_Thea/experiments/quantification_test 5_3D9/3D9_5
401	228	8,982	120	PMA	1041,1043,1043,1044,1044,1045,1045,1046,1046,1047,1047,1048,1048,1047,1047,1046,1046,1045,1045,1039,1039,1038,1038,1036,1036,1035,1035,1034,1034,1035,1035,1037,1037,1039,1039,1041,	69,69,70,70,71,71,74,74,77,77,79,79,85,85,87,87,88,88,89,89,88,88,87,87,85,85,82,82,72,72,70,70,69,69,68,68,	/Volumes/Promise RAID 2/Alf/for_Thea/experiments/quantification_test 5_3D9/str_data/PMA/120/3D9_PMA_120image_hoescht187.TIF 3D9_PMA_120image_568186.tif	1750	8,982	0	preAnalysis	none	none	120 PMA	qt_5_3D9_man03	/Volumes/Promise RAID/Alf/for_Thea/experiments/quantification_test 5_3D9/3D9_5
402	242	12,231	120	PMA	1316,1317,1317,1324,1324,1326,1326,1327,1327,1326,1326,1325,1325,1324,1324,1321,1321,1320,1320,1317,1317,1310,1310,1308,1308,1307,1307,1306,1306,1305,1305,1306,1306,1307,1307,1308,1308,1311,1311,1316,	82,82,81,81,82,82,83,83,88,88,90,90,91,91,92,92,93,93,94,94,95,95,94,94,93,93,91,91,90,90,88,88,86,86,84,84,82,82,81,81,	/Volumes/Promise RAID 2/Alf/for_Thea/experiments/quantification_test 5_3D9/str_data/PMA/120/3D9_PMA_120image_hoescht187.TIF 3D9_PMA_120image_568186.tif	1750	12,231	0	preAnalysis	none	none	120 PMA	qt_5_3D9_man03	/Volumes/Promise RAID/Alf/for_Thea/experiments/quantification_test 5_3D9/3D9_5
403	205	9,912	120	PMA	774,776,776,777,777,778,778,777,777,776,776,775,775,773,773,772,772,770,770,768,768,766,766,764,764,763,763,762,762,761,761,762,762,763,763,764,764,765,765,766,766,768,768,774,	94,94,95,95,97,97,101,101,103,103,105,105,106,106,107,107,108,108,109,109,110,110,109,109,108,108,107,107,105,105,101,101,99,99,98,98,96,96,95,95,94,94,93,93,	/Volumes/Promise RAID 2/Alf/for_Thea/experiments/quantification_test 5_3D9/str_data/PMA/120/3D9_PMA_120image_hoescht187.TIF 3D9_PMA_120image_568186.tif	1750	9,912	0	preAnalysis	none	none	120 PMA	qt_5_3D9_man03	/Volumes/Promise RAID/Alf/for_Thea/experiments/quantification_test 5_3D9/3D9_5
404	228	7,649	120	PMA	1106,1107,1107,1109,1109,1111,1111,1112,1112,1113,1113,1112,1112,1111,1111,1110,1110,1108,1108,1100,1100,1099,1099,1098,1098,1097,1097,1096,1096,1097,1097,1098,1098,1099,1099,1101,1101,1106,	97,97,98,98,99,99,101,101,103,103,107,107,110,110,111,111,112,112,113,113,112,112,111,111,110,110,108,108,102,102,100,100,98,98,97,97,96,96,	/Volumes/Promise RAID 2/Alf/for_Thea/experiments/quantification_test 5_3D9/str_data/PMA/120/3D9_PMA_120image_hoescht187.TIF 3D9_PMA_120image_568186.tif	1750	7,649	0	preAnalysis	none	none	120 PMA	qt_5_3D9_man03	/Volumes/Promise RAID/Alf/for_Thea/experiments/quantification_test 5_3D9/3D9_5
405	214	7,551	120	PMA	485,488,488,489,489,490,490,491,491,492,492,493,493,492,492,490,490,488,488,484,484,482,482,481,481,480,480,479,479,478,478,477,477,478,478,480,480,481,481,485,	101,101,102,102,103,103,107,107,108,108,109,109,114,114,116,116,117,117,118,118,117,117,116,116,115,115,114,114,113,113,111,111,104,104,102,102,101,101,100,100,	/Volumes/Promise RAID 2/Alf/for_Thea/experiments/quantification_test 5_3D9/str_data/PMA/120/3D9_PMA_120image_hoescht187.TIF 3D9_PMA_120image_568186.tif	1750	7,551	0	preAnalysis	none	none	120 PMA	qt_5_3D9_man03	/Volumes/Promise RAID/Alf/for_Thea/experiments/quantification_test 5_3D9/3D9_5
406	239	6,293	120	PMA	1028,1029,1029,1030,1030,1031,1031,1032,1032,1031,1031,1030,1030,1029,1029,1026,1026,1021,1021,1019,1019,1018,1018,1017,1017,1016,1016,1017,1017,1018,1018,1021,1021,1028,	102,102,103,103,104,104,106,106,114,114,116,116,117,117,118,118,119,119,118,118,116,116,114,114,112,112,104,104,103,103,102,102,101,101,	/Volumes/Promise RAID 2/Alf/for_Thea/experiments/quantification_test 5_3D9/str_data/PMA/120/3D9_PMA_120image_hoescht187.TIF 3D9_PMA_120image_568186.tif	1750	6,293	0	preAnalysis	none	none	120 PMA	qt_5_3D9_man03	/Volumes/Promise RAID/Alf/for_Thea/experiments/quantification_test 5_3D9/3D9_5
407	238	11,067	120	PMA	1210,1212,1212,1213,1213,1214,1214,1213,1213,1212,1212,1211,1211,1210,1210,1209,1209,1207,1207,1202,1202,1200,1200,1199,1199,1198,1198,1197,1197,1198,1198,1199,1199,1200,1200,1201,1201,1203,1203,1210,	118,118,120,120,121,121,125,125,127,127,129,129,132,132,133,133,134,134,135,135,134,134,133,133,132,132,131,131,123,123,121,121,120,120,119,119,118,118,117,117,	/Volumes/Promise RAID 2/Alf/for_Thea/experiments/quantification_test 5_3D9/str_data/PMA/120/3D9_PMA_120image_hoescht187.TIF 3D9_PMA_120image_568186.tif	1750	11,067	0	preAnalysis	none	none	120 PMA	qt_5_3D9_man03	/Volumes/Promise RAID/Alf/for_Thea/experiments/quantification_test 5_3D9/3D9_5
408	183	6,383	120	PMA	358,360,360,361,361,362,362,363,363,362,362,360,360,359,359,358,358,357,357,352,352,350,350,349,349,348,348,349,349,350,350,351,351,353,353,358,	123,123,124,124,125,125,127,127,130,130,132,132,135,135,136,136,137,137,138,138,137,137,136,136,134,134,126,126,125,125,124,124,123,123,122,122,	/Volumes/Promise RAID 2/Alf/for_Thea/experiments/quantification_test 5_3D9/str_data/PMA/120/3D9_PMA_120image_hoescht187.TIF 3D9_PMA_120image_568186.tif	1750	6,383	0	preAnalysis	none	none	120 PMA	qt_5_3D9_man03	/Volumes/Promise RAID/Alf/for_Thea/experiments/quantification_test 5_3D9/3D9_5
409	2746	59,672	120	PMA	845,846,846,848,848,849,849,850,850,852,852,853,853,854,854,855,855,854,854,853,853,854,854,855,855,873,873,875,875,876,876,877,877,878,878,879,879,880,880,879,879,880,880,884,884,885,885,884,884,882,882,879,879,878,878,877,877,876,876,875,875,874,874,873,873,872,872,871,871,870,870,869,869,868,868,867,867,866,866,865,865,864,864,863,863,862,862,861,861,860,860,861,861,862,862,864,864,865,865,866…	127,127,128,128,129,129,131,131,132,132,133,133,134,134,137,137,142,142,144,144,147,147,146,146,147,147,148,148,149,149,150,150,151,151,153,153,156,156,160,160,165,165,166,166,165,165,166,166,167,167,168,168,169,169,170,170,171,171,172,172,174,174,175,175,177,177,178,178,179,179,180,180,182,182,183,183,185,185,187,187,189,189,190,190,192,192,193,193,194,194,198,198,199,199,200,200,201,201,202,202…	/Volumes/Promise RAID 2/Alf/for_Thea/experiments/quantification_test 5_3D9/str_data/PMA/120/3D9_PMA_120image_hoescht187.TIF 3D9_PMA_120image_568186.tif	1750	59,672	0	preAnalysis	none	none	120 PMA	qt_5_3D9_man03	/Volumes/Promise RAID/Alf/for_Thea/experiments/quantification_test 5_3D9/3D9_5
410	213	11,117	120	PMA	682,684,684,685,685,686,686,685,685,684,684,682,682,680,680,675,675,672,672,670,670,669,669,668,668,667,667,668,668,669,669,671,671,673,673,676,676,682,	136,136,138,138,141,141,143,143,145,145,147,147,148,148,149,149,150,150,149,149,148,148,147,147,146,146,141,141,139,139,138,138,137,137,136,136,135,135,	/Volumes/Promise RAID 2/Alf/for_Thea/experiments/quantification_test 5_3D9/str_data/PMA/120/3D9_PMA_120image_hoescht187.TIF 3D9_PMA_120image_568186.tif	1750	11,117	0	preAnalysis	none	none	120 PMA	qt_5_3D9_man03	/Volumes/Promise RAID/Alf/for_Thea/experiments/quantification_test 5_3D9/3D9_5
411	251	9,944	120	PMA	1242,1243,1243,1244,1244,1245,1245,1244,1244,1243,1243,1242,1242,1241,1241,1240,1240,1239,1239,1238,1238,1230,1230,1229,1229,1228,1228,1229,1229,1230,1230,1231,1231,1232,1232,1233,1233,1234,1234,1236,1236,1238,1238,1242,	140,140,141,141,142,142,148,148,150,150,151,151,152,152,156,156,158,158,159,159,160,160,159,159,157,157,150,150,148,148,147,147,146,146,144,144,143,143,141,141,140,140,139,139,	/Volumes/Promise RAID 2/Alf/for_Thea/experiments/quantification_test 5_3D9/str_data/PMA/120/3D9_PMA_120image_hoescht187.TIF 3D9_PMA_120image_568186.tif	1750	9,944	0	preAnalysis	none	none	120 PMA	qt_5_3D9_man03	/Volumes/Promise RAID/Alf/for_Thea/experiments/quantification_test 5_3D9/3D9_5
412	240	11,133	120	PMA	748,749,749,750,750,751,751,752,752,753,753,754,754,755,755,754,754,753,753,751,751,745,745,744,744,742,742,740,740,738,738,737,737,736,736,737,737,738,738,740,740,748,	151,151,152,152,153,153,154,154,155,155,156,156,159,159,163,163,165,165,166,166,167,167,166,166,165,165,163,163,162,162,160,160,159,159,153,153,152,152,151,151,150,150,	/Volumes/Promise RAID 2/Alf/for_Thea/experiments/quantification_test 5_3D9/str_data/PMA/120/3D9_PMA_120image_hoescht187.TIF 3D9_PMA_120image_568186.tif	1750	11,133	0	preAnalysis	none	none	120 PMA	qt_5_3D9_man03	/Volumes/Promise RAID/Alf/for_Thea/experiments/quantification_test 5_3D9/3D9_5
413	202	12,752	120	PMA	490,492,492,493,493,494,494,495,495,496,496,495,495,494,494,493,493,491,491,487,487,485,485,484,484,483,483,481,481,480,480,479,479,480,480,481,481,482,482,483,483,490,	154,154,155,155,156,156,158,158,161,161,164,164,166,166,167,167,168,168,169,169,168,168,167,167,166,166,165,165,164,164,162,162,158,158,156,156,155,155,154,154,153,153,	/Volumes/Promise RAID 2/Alf/for_Thea/experiments/quantification_test 5_3D9/str_data/PMA/120/3D9_PMA_120image_hoescht187.TIF 3D9_PMA_120image_568186.tif	1750	12,752	0	preAnalysis	none	none	120 PMA	qt_5_3D9_man03	/Volumes/Promise RAID/Alf/for_Thea/experiments/quantification_test 5_3D9/3D9_5
414	223	8,897	120	PMA	641,643,643,644,644,645,645,644,644,643,643,644,644,643,643,642,642,641,641,635,635,634,634,632,632,631,631,630,630,631,631,632,632,634,634,636,636,641,	155,155,156,156,158,158,161,161,163,163,166,166,168,168,171,171,172,172,173,173,172,172,171,171,169,169,166,166,160,160,157,157,156,156,155,155,154,154,	/Volumes/Promise RAID 2/Alf/for_Thea/experiments/quantification_test 5_3D9/str_data/PMA/120/3D9_PMA_120image_hoescht187.TIF 3D9_PMA_120image_568186.tif	1750	8,897	0	preAnalysis	none	none	120 PMA	qt_5_3D9_man03	/Volumes/Promise RAID/Alf/for_Thea/experiments/quantification_test 5_3D9/3D9_5
415	164	8	120	PMA	331,333,333,334,334,335,335,336,336,335,335,334,334,332,332,330,330,329,329,326,326,325,325,324,324,322,322,321,321,320,320,321,321,322,322,324,324,331,	171,171,172,172,173,173,174,174,179,179,180,180,182,182,183,183,184,184,183,183,182,182,181,181,180,180,179,179,178,178,173,173,172,172,171,171,170,170,	/Volumes/Promise RAID 2/Alf/for_Thea/experiments/quantification_test 5_3D9/str_data/PMA/120/3D9_PMA_120image_hoescht187.TIF 3D9_PMA_120image_568186.tif	1750	8	0	preAnalysis	none	none	120 PMA	qt_5_3D9_man03	/Volumes/Promise RAID/Alf/for_Thea/experiments/quantification_test 5_3D9/3D9_5
416	212	12,075	120	PMA	664,666,666,667,667,668,668,669,669,668,668,667,667,666,666,665,665,664,664,663,663,660,660,657,657,655,655,654,654,653,653,652,652,653,653,654,654,655,655,656,656,657,657,658,658,663,663,664,	178,178,179,179,180,180,181,181,187,187,188,188,189,189,190,190,191,191,192,192,194,194,195,195,194,194,193,193,192,192,190,190,186,186,184,184,182,182,181,181,180,180,179,179,178,178,177,177,	/Volumes/Promise RAID 2/Alf/for_Thea/experiments/quantification_test 5_3D9/str_data/PMA/120/3D9_PMA_120image_hoescht187.TIF 3D9_PMA_120image_568186.tif	1750	12,075	0	preAnalysis	none	none	120 PMA	qt_5_3D9_man03	/Volumes/Promise RAID/Alf/for_Thea/experiments/quantification_test 5_3D9/3D9_5
417	164	6,537	120	PMA	146,148,148,150,150,151,151,152,152,151,151,150,150,149,149,145,145,140,140,139,139,138,138,137,137,138,138,139,139,140,140,142,142,146,	198,198,199,199,200,200,202,202,207,207,209,209,210,210,211,211,210,210,209,209,208,208,207,207,201,201,200,200,199,199,198,198,197,197,	/Volumes/Promise RAID 2/Alf/for_Thea/experiments/quantification_test 5_3D9/str_data/PMA/120/3D9_PMA_120image_hoescht187.TIF 3D9_PMA_120image_568186.tif	1750	6,537	0	preAnalysis	none	none	120 PMA	qt_5_3D9_man03	/Volumes/Promise RAID/Alf/for_Thea/experiments/quantification_test 5_3D9/3D9_5
418	169	2,367	120	PMA	62,64,64,65,65,66,66,67,67,66,66,65,65,64,64,63,63,61,61,59,59,55,55,54,54,53,53,54,54,55,55,56,56,57,57,58,58,59,59,62,	199,199,200,200,204,204,205,205,209,209,211,211,212,212,213,213,214,214,215,215,216,216,215,215,214,214,210,210,209,209,206,206,202,202,200,200,199,199,198,198,	/Volumes/Promise RAID 2/Alf/for_Thea/experiments/quantification_test 5_3D9/str_data/PMA/120/3D9_PMA_120image_hoescht187.TIF 3D9_PMA_120image_568186.tif	1750	2,367	0	preAnalysis	none	none	120 PMA	qt_5_3D9_man03	/Volumes/Promise RAID/Alf/for_Thea/experiments/quantification_test 5_3D9/3D9_5
419	265	12,981	120	PMA	1204,1207,1207,1212,1212,1213,1213,1214,1214,1215,1215,1216,1216,1215,1215,1214,1214,1213,1213,1212,1212,1210,1210,1204,1204,1203,1203,1202,1202,1197,1197,1196,1196,1195,1195,1196,1196,1197,1197,1198,1198,1199,1199,1201,1201,1204,	214,214,215,215,216,216,217,217,218,218,220,220,224,224,226,226,227,227,228,228,229,229,230,230,229,229,228,228,227,227,226,226,225,225,218,218,217,217,216,216,215,215,214,214,213,213,	/Volumes/Promise RAID 2/Alf/for_Thea/experiments/quantification_test 5_3D9/str_data/PMA/120/3D9_PMA_120image_hoescht187.TIF 3D9_PMA_120image_568186.tif	1750	12,981	0	preAnalysis	none	none	120 PMA	qt_5_3D9_man03	/Volumes/Promise RAID/Alf/for_Thea/experiments/quantification_test 5_3D9/3D9_5
420	171	14,041	120	PMA	208,210,210,211,211,210,210,209,209,208,208,206,206,203,203,201,201,199,199,198,198,197,197,198,198,199,199,200,200,201,201,203,203,208,	228,228,230,230,235,235,240,240,241,241,242,242,243,243,242,242,241,241,240,240,239,239,233,233,232,232,231,231,230,230,228,228,227,227,	/Volumes/Promise RAID 2/Alf/for_Thea/experiments/quantification_test 5_3D9/str_data/PMA/120/3D9_PMA_120image_hoescht187.TIF 3D9_PMA_120image_568186.tif	1750	14,041	0	preAnalysis	none	none	120 PMA	qt_5_3D9_man03	/Volumes/Promise RAID/Alf/for_Thea/experiments/quantification_test 5_3D9/3D9_5
421	221	8,036	120	PMA	512,515,515,517,517,518,518,519,519,520,520,519,519,517,517,512,512,506,506,505,505,504,504,503,503,502,502,501,501,502,502,503,503,512,	234,234,235,235,236,236,237,237,241,241,244,244,246,246,247,247,248,248,247,247,246,246,242,242,241,241,239,239,236,236,234,234,233,233,	/Volumes/Promise RAID 2/Alf/for_Thea/experiments/quantification_test 5_3D9/str_data/PMA/120/3D9_PMA_120image_hoescht187.TIF 3D9_PMA_120image_568186.tif	1750	8,036	0	preAnalysis	none	none	120 PMA	qt_5_3D9_man03	/Volumes/Promise RAID/Alf/for_Thea/experiments/quantification_test 5_3D9/3D9_5
422	211	14,682	120	PMA	558,561,561,563,563,564,564,565,565,566,566,565,565,564,564,563,563,561,561,559,559,555,555,553,553,552,552,551,551,550,550,549,549,550,550,551,551,552,552,556,556,558,	235,235,236,236,237,237,238,238,241,241,247,247,248,248,249,249,250,250,251,251,250,250,248,248,247,247,246,246,245,245,244,244,239,239,237,237,236,236,235,235,234,234,	/Volumes/Promise RAID 2/Alf/for_Thea/experiments/quantification_test 5_3D9/str_data/PMA/120/3D9_PMA_120image_hoescht187.TIF 3D9_PMA_120image_568186.tif	1750	14,682	0	preAnalysis	none	none	120 PMA	qt_5_3D9_man03	/Volumes/Promise RAID/Alf/for_Thea/experiments/quantification_test 5_3D9/3D9_5
423	229	10,061	120	PMA	644,646,646,647,647,648,648,649,649,648,648,647,647,646,646,644,644,639,639,637,637,636,636,635,635,634,634,633,633,632,632,633,633,634,634,636,636,638,638,644,	237,237,238,238,239,239,241,241,248,248,250,250,251,251,252,252,253,253,252,252,251,251,250,250,249,249,248,248,246,246,240,240,239,239,238,238,237,237,236,236,	/Volumes/Promise RAID 2/Alf/for_Thea/experiments/quantification_test 5_3D9/str_data/PMA/120/3D9_PMA_120image_hoescht187.TIF 3D9_PMA_120image_568186.tif	1750	10,061	0	preAnalysis	none	none	120 PMA	qt_5_3D9_man03	/Volumes/Promise RAID/Alf/for_Thea/experiments/quantification_test 5_3D9/3D9_5
424	237	13,3	120	PMA	1067,1075,1075,1076,1076,1077,1077,1078,1078,1077,1077,1076,1076,1075,1075,1074,1074,1070,1070,1068,1068,1064,1064,1063,1063,1062,1062,1061,1061,1060,1060,1061,1061,1062,1062,1063,1063,1066,1066,1067,	239,239,240,240,242,242,243,243,250,250,251,251,252,252,253,253,254,254,255,255,254,254,253,253,252,252,251,251,249,249,243,243,241,241,240,240,239,239,238,238,	/Volumes/Promise RAID 2/Alf/for_Thea/experiments/quantification_test 5_3D9/str_data/PMA/120/3D9_PMA_120image_hoescht187.TIF 3D9_PMA_120image_568186.tif	1750	13,3	0	preAnalysis	none	none	120 PMA	qt_5_3D9_man03	/Volumes/Promise RAID/Alf/for_Thea/experiments/quantification_test 5_3D9/3D9_5
425	170	31,324	120	PMA	1299,1301,1301,1302,1302,1303,1303,1304,1304,1305,1305,1307,1307,1308,1308,1309,1309,1311,1311,1307,1307,1305,1305,1304,1304,1303,1303,1301,1301,1300,1300,1297,1297,1295,1295,1294,1294,1293,1293,1292,1292,1290,1290,1289,1289,1290,1290,1291,1291,1292,1292,1294,1294,1296,1296,1297,1297,1298,1298,1297,1297,1299,	241,241,244,244,247,247,249,249,250,250,251,251,252,252,254,254,255,255,258,258,259,259,258,258,256,256,255,255,256,256,255,255,253,253,255,255,254,254,252,252,250,250,248,248,247,247,248,248,247,247,246,246,245,245,244,244,243,243,241,241,240,240,	/Volumes/Promise RAID 2/Alf/for_Thea/experiments/quantification_test 5_3D9/str_data/PMA/120/3D9_PMA_120image_hoescht187.TIF 3D9_PMA_120image_568186.tif	1750	31,324	0	preAnalysis	none	none	120 PMA	qt_5_3D9_man03	/Volumes/Promise RAID/Alf/for_Thea/experiments/quantification_test 5_3D9/3D9_5
426	204	13,725	120	PMA	1221,1222,1222,1224,1224,1226,1226,1228,1228,1229,1229,1230,1230,1229,1229,1228,1228,1227,1227,1223,1223,1222,1222,1218,1218,1217,1217,1216,1216,1215,1215,1214,1214,1215,1215,1216,1216,1217,1217,1218,1218,1220,1220,1221,	244,244,243,243,244,244,245,245,246,246,248,248,255,255,257,257,258,258,259,259,260,260,259,259,258,258,257,257,256,256,253,253,250,250,248,248,246,246,245,245,244,244,243,243,	/Volumes/Promise RAID 2/Alf/for_Thea/experiments/quantification_test 5_3D9/str_data/PMA/120/3D9_PMA_120image_hoescht187.TIF 3D9_PMA_120image_568186.tif	1750	13,725	0	preAnalysis	none	none	120 PMA	qt_5_3D9_man03	/Volumes/Promise RAID/Alf/for_Thea/experiments/quantification_test 5_3D9/3D9_5
427	187	10,267	120	PMA	363,365,365,367,367,368,368,369,369,368,368,366,366,359,359,355,355,354,354,353,353,352,352,353,353,354,354,355,355,359,359,363,	245,245,246,246,247,247,249,249,255,255,257,257,258,258,257,257,256,256,255,255,251,251,250,250,248,248,246,246,245,245,244,244,	/Volumes/Promise RAID 2/Alf/for_Thea/experiments/quantification_test 5_3D9/str_data/PMA/120/3D9_PMA_120image_hoescht187.TIF 3D9_PMA_120image_568186.tif	1750	10,267	0	preAnalysis	none	none	120 PMA	qt_5_3D9_man03	/Volumes/Promise RAID/Alf/for_Thea/experiments/quantification_test 5_3D9/3D9_5
428	204	4,941	120	PMA	264,268,268,269,269,270,270,271,271,272,272,271,271,270,270,264,264,263,263,262,262,257,257,256,256,255,255,256,256,257,257,258,258,259,259,262,262,264,	257,257,258,258,259,259,260,260,262,262,269,269,271,271,272,272,271,271,270,270,269,269,268,268,267,267,262,262,260,260,259,259,258,258,257,257,256,256,	/Volumes/Promise RAID 2/Alf/for_Thea/experiments/quantification_test 5_3D9/str_data/PMA/120/3D9_PMA_120image_hoescht187.TIF 3D9_PMA_120image_568186.tif	1750	4,941	0	preAnalysis	none	none	120 PMA	qt_5_3D9_man03	/Volumes/Promise RAID/Alf/for_Thea/experiments/quantification_test 5_3D9/3D9_5
429	189	9,143	120	PMA	393,396,396,398,398,399,399,400,400,401,401,400,400,399,399,398,398,397,397,395,395,391,391,390,390,389,389,388,388,386,386,385,385,384,384,385,385,386,386,387,387,390,390,393,	258,258,259,259,260,260,261,261,263,263,266,266,268,268,270,270,271,271,272,272,273,273,272,272,271,271,270,270,269,269,267,267,264,264,263,263,261,261,259,259,258,258,257,257,	/Volumes/Promise RAID 2/Alf/for_Thea/experiments/quantification_test 5_3D9/str_data/PMA/120/3D9_PMA_120image_hoescht187.TIF 3D9_PMA_120image_568186.tif	1750	9,143	0	preAnalysis	none	none	120 PMA	qt_5_3D9_man03	/Volumes/Promise RAID/Alf/for_Thea/experiments/quantification_test 5_3D9/3D9_5
430	173	7,676	120	PMA	130,133,133,134,134,135,135,134,134,132,132,128,128,126,126,121,121,120,120,119,119,118,118,119,119,120,120,122,122,124,124,130,	261,261,262,262,263,263,269,269,270,270,271,271,272,272,273,273,272,272,271,271,270,270,265,265,263,263,262,262,261,261,260,260,	/Volumes/Promise RAID 2/Alf/for_Thea/experiments/quantification_test 5_3D9/str_data/PMA/120/3D9_PMA_120image_hoescht187.TIF 3D9_PMA_120image_568186.tif	1750	7,676	0	preAnalysis	none	none	120 PMA	qt_5_3D9_man03	/Volumes/Promise RAID/Alf/for_Thea/experiments/quantification_test 5_3D9/3D9_5
431	219	10,886	120	PMA	548,552,552,553,553,554,554,555,555,556,556,555,555,554,554,553,553,552,552,546,546,544,544,543,543,541,541,540,540,539,539,540,540,541,541,544,544,548,	276,276,277,277,278,278,279,279,282,282,286,286,289,289,290,290,291,291,292,292,291,291,289,289,287,287,286,286,284,284,279,279,277,277,276,276,275,275,	/Volumes/Promise RAID 2/Alf/for_Thea/experiments/quantification_test 5_3D9/str_data/PMA/120/3D9_PMA_120image_hoescht187.TIF 3D9_PMA_120image_568186.tif	1750	10,886	0	preAnalysis	none	none	120 PMA	qt_5_3D9_man03	/Volumes/Promise RAID/Alf/for_Thea/experiments/quantification_test 5_3D9/3D9_5
432	181	4,066	120	PMA	68,71,71,72,72,73,73,74,74,78,78,81,81,82,82,83,83,84,84,83,83,81,81,79,79,77,77,74,74,71,71,68,68,66,66,64,64,63,63,64,64,65,65,67,67,68,	307,307,308,308,309,309,310,310,309,309,310,310,311,311,312,312,313,313,316,316,318,318,319,319,318,318,317,317,318,318,319,319,318,318,316,316,313,313,310,310,308,308,307,307,306,306,	/Volumes/Promise RAID 2/Alf/for_Thea/experiments/quantification_test 5_3D9/str_data/PMA/120/3D9_PMA_120image_hoescht187.TIF 3D9_PMA_120image_568186.tif	1750	4,066	0	preAnalysis	none	none	120 PMA	qt_5_3D9_man03	/Volumes/Promise RAID/Alf/for_Thea/experiments/quantification_test 5_3D9/3D9_5
433	179	5,989	120	PMA	203,205,205,206,206,207,207,208,208,207,207,206,206,204,204,197,197,196,196,194,194,193,193,192,192,191,191,192,192,193,193,194,194,198,198,201,201,203,	307,307,308,308,309,309,311,311,317,317,318,318,319,319,320,320,319,319,318,318,317,317,316,316,315,315,311,311,310,310,309,309,308,308,307,307,306,306,	/Volumes/Promise RAID 2/Alf/for_Thea/experiments/quantification_test 5_3D9/str_data/PMA/120/3D9_PMA_120image_hoescht187.TIF 3D9_PMA_120image_568186.tif	1750	5,989	0	preAnalysis	none	none	120 PMA	qt_5_3D9_man03	/Volumes/Promise RAID/Alf/for_Thea/experiments/quantification_test 5_3D9/3D9_5
434	228	12,553	120	PMA	935,937,937,938,938,939,939,938,938,937,937,936,936,935,935,934,934,933,933,931,931,927,927,925,925,924,924,923,923,924,924,925,925,926,926,928,928,930,930,935,	307,307,308,308,310,310,314,314,317,317,318,318,320,320,322,322,323,323,324,324,325,325,324,324,322,322,320,320,313,313,310,310,309,309,308,308,307,307,306,306,	/Volumes/Promise RAID 2/Alf/for_Thea/experiments/quantification_test 5_3D9/str_data/PMA/120/3D9_PMA_120image_hoescht187.TIF 3D9_PMA_120image_568186.tif	1750	12,553	0	preAnalysis	none	none	120 PMA	qt_5_3D9_man03	/Volumes/Promise RAID/Alf/for_Thea/experiments/quantification_test 5_3D9/3D9_5
435	198	26,576	120	PMA	868,870,870,872,872,874,874,873,873,874,874,875,875,874,874,875,875,876,876,875,875,877,877,876,876,874,874,873,873,871,871,870,870,869,869,867,867,866,866,865,865,862,862,861,861,862,862,863,863,864,864,865,865,866,866,868,	319,319,318,318,319,319,322,322,324,324,326,326,327,327,328,328,329,329,331,331,335,335,337,337,336,336,337,337,336,336,339,339,338,338,336,336,335,335,334,334,332,332,331,331,329,329,326,326,324,324,322,322,319,319,318,318,	/Volumes/Promise RAID 2/Alf/for_Thea/experiments/quantification_test 5_3D9/str_data/PMA/120/3D9_PMA_120image_hoescht187.TIF 3D9_PMA_120image_568186.tif	1750	26,576	0	preAnalysis	none	none	120 PMA	qt_5_3D9_man03	/Volumes/Promise RAID/Alf/for_Thea/experiments/quantification_test 5_3D9/3D9_5
436	235	11,711	120	PMA	1149,1152,1152,1153,1153,1154,1154,1155,1155,1154,1154,1153,1153,1152,1152,1150,1150,1143,1143,1141,1141,1140,1140,1139,1139,1140,1140,1141,1141,1142,1142,1143,1143,1144,1144,1147,1147,1149,	338,338,339,339,340,340,342,342,350,350,352,352,353,353,355,355,356,356,355,355,353,353,351,351,349,349,344,344,341,341,340,340,339,339,338,338,337,337,	/Volumes/Promise RAID 2/Alf/for_Thea/experiments/quantification_test 5_3D9/str_data/PMA/120/3D9_PMA_120image_hoescht187.TIF 3D9_PMA_120image_568186.tif	1750	11,711	0	preAnalysis	none	none	120 PMA	qt_5_3D9_man03	/Volumes/Promise RAID/Alf/for_Thea/experiments/quantification_test 5_3D9/3D9_5
437	261	12,751	120	PMA	1244,1246,1246,1247,1247,1248,1248,1247,1247,1246,1246,1245,1245,1244,1244,1243,1243,1242,1242,1241,1241,1240,1240,1238,1238,1235,1235,1233,1233,1232,1232,1231,1231,1230,1230,1231,1231,1232,1232,1234,1234,1235,1235,1236,1236,1238,1238,1239,1239,1244,	340,340,341,341,345,345,348,348,349,349,351,351,352,352,354,354,356,356,357,357,358,358,359,359,360,360,359,359,358,358,357,357,356,356,348,348,347,347,344,344,343,343,342,342,341,341,340,340,339,339,	/Volumes/Promise RAID 2/Alf/for_Thea/experiments/quantification_test 5_3D9/str_data/PMA/120/3D9_PMA_120image_hoescht187.TIF 3D9_PMA_120image_568186.tif	1750	12,751	0	preAnalysis	none	none	120 PMA	qt_5_3D9_man03	/Volumes/Promise RAID/Alf/for_Thea/experiments/quantification_test 5_3D9/3D9_5
438	202	9,267	120	PMA	551,553,553,554,554,555,555,556,556,555,555,554,554,553,553,551,551,547,547,545,545,544,544,543,543,542,542,543,543,544,544,545,545,546,546,551,	342,342,343,343,344,344,348,348,354,354,356,356,357,357,358,358,359,359,358,358,357,357,355,355,353,353,345,345,344,344,343,343,342,342,341,341,	/Volumes/Promise RAID 2/Alf/for_Thea/experiments/quantification_test 5_3D9/str_data/PMA/120/3D9_PMA_120image_hoescht187.TIF 3D9_PMA_120image_568186.tif	1750	9,267	0	preAnalysis	none	none	120 PMA	qt_5_3D9_man03	/Volumes/Promise RAID/Alf/for_Thea/experiments/quantification_test 5_3D9/3D9_5
439	155	8,671	120	PMA	127,129,129,130,130,131,131,132,132,131,131,130,130,126,126,119,119,118,118,117,117,118,118,119,119,120,120,121,121,123,123,127,	355,355,356,356,357,357,358,358,364,364,365,365,366,366,367,367,366,366,364,364,359,359,358,358,357,357,356,356,355,355,354,354,	/Volumes/Promise RAID 2/Alf/for_Thea/experiments/quantification_test 5_3D9/str_data/PMA/120/3D9_PMA_120image_hoescht187.TIF 3D9_PMA_120image_568186.tif	1750	8,671	0	preAnalysis	none	none	120 PMA	qt_5_3D9_man03	/Volumes/Promise RAID/Alf/for_Thea/experiments/quantification_test 5_3D9/3D9_5
440	221	11,367	120	PMA	632,634,634,635,635,634,634,633,633,632,632,630,630,629,629,624,624,623,623,622,622,621,621,620,620,621,621,622,622,623,623,624,624,625,625,627,627,632,	377,377,379,379,389,389,391,391,392,392,394,394,395,395,396,396,395,395,394,394,393,393,391,391,388,388,386,386,385,385,382,382,379,379,377,377,376,376,	/Volumes/Promise RAID 2/Alf/for_Thea/experiments/quantification_test 5_3D9/str_data/PMA/120/3D9_PMA_120image_hoescht187.TIF 3D9_PMA_120image_568186.tif	1750	11,367	0	preAnalysis	none	none	120 PMA	qt_5_3D9_man03	/Volumes/Promise RAID/Alf/for_Thea/experiments/quantification_test 5_3D9/3D9_5
441	186	6,968	120	PMA	245,246,246,249,249,251,251,252,252,251,251,250,250,245,245,243,243,237,237,236,236,235,235,234,234,235,235,236,236,237,237,238,238,239,239,240,240,245,	386,386,387,387,388,388,390,390,394,394,396,396,397,397,398,398,399,399,398,398,397,397,396,396,392,392,390,390,389,389,388,388,387,387,386,386,385,385,	/Volumes/Promise RAID 2/Alf/for_Thea/experiments/quantification_test 5_3D9/str_data/PMA/120/3D9_PMA_120image_hoescht187.TIF 3D9_PMA_120image_568186.tif	1750	6,968	0	preAnalysis	none	none	120 PMA	qt_5_3D9_man03	/Volumes/Promise RAID/Alf/for_Thea/experiments/quantification_test 5_3D9/3D9_5
442	161	4,969	120	PMA	98,99,99,100,100,99,99,98,98,96,96,94,94,91,91,89,89,88,88,87,87,86,86,87,87,88,88,89,89,90,90,91,91,98,	388,388,389,389,396,396,398,398,400,400,401,401,402,402,401,401,400,400,399,399,397,397,394,394,392,392,390,390,389,389,388,388,387,387,	/Volumes/Promise RAID 2/Alf/for_Thea/experiments/quantification_test 5_3D9/str_data/PMA/120/3D9_PMA_120image_hoescht187.TIF 3D9_PMA_120image_568186.tif	1750	4,969	0	preAnalysis	none	none	120 PMA	qt_5_3D9_man03	/Volumes/Promise RAID/Alf/for_Thea/experiments/quantification_test 5_3D9/3D9_5
443	126	23,897	120	PMA	1057,1056,1056,1054,1054,1055,1055,1054,1054,1053,1053,1052,1052,1051,1051,1049,1049,1047,1047,1044,1044,1039,1039,1037,1037,1036,1036,1037,1037,1039,1039,1040,1040,1043,1043,1045,1045,1050,1050,1052,1052,1053,1053,1054,1054,1057,	406,406,408,408,409,409,410,410,414,414,413,413,414,414,415,415,416,416,418,418,417,417,416,416,415,415,414,414,413,413,412,412,411,411,410,410,409,409,408,408,406,406,405,405,403,403,	/Volumes/Promise RAID 2/Alf/for_Thea/experiments/quantification_test 5_3D9/str_data/PMA/120/3D9_PMA_120image_hoescht187.TIF 3D9_PMA_120image_568186.tif	1750	23,897	0	preAnalysis	none	none	120 PMA	qt_5_3D9_man03	/Volumes/Promise RAID/Alf/for_Thea/experiments/quantification_test 5_3D9/3D9_5
444	234	11,624	120	PMA	989,991,991,992,992,993,993,994,994,995,995,996,996,997,997,996,996,995,995,994,994,992,992,989,989,986,986,984,984,982,982,981,981,980,980,979,979,980,980,981,981,982,982,983,983,985,985,989,	406,406,407,407,408,408,409,409,410,410,411,411,413,413,417,417,419,419,420,420,421,421,422,422,423,423,422,422,421,421,420,420,419,419,418,418,413,413,411,411,409,409,407,407,406,406,405,405,	/Volumes/Promise RAID 2/Alf/for_Thea/experiments/quantification_test 5_3D9/str_data/PMA/120/3D9_PMA_120image_hoescht187.TIF 3D9_PMA_120image_568186.tif	1750	11,624	0	preAnalysis	none	none	120 PMA	qt_5_3D9_man03	/Volumes/Promise RAID/Alf/for_Thea/experiments/quantification_test 5_3D9/3D9_5
445	205	8,976	120	PMA	368,369,369,370,370,371,371,372,372,371,371,370,370,369,369,367,367,361,361,360,360,359,359,358,358,357,357,356,356,355,355,356,356,357,357,358,358,368,	414,414,415,415,416,416,418,418,424,424,426,426,427,427,428,428,429,429,427,427,424,424,423,423,422,422,421,421,420,420,417,417,415,415,414,414,413,413,	/Volumes/Promise RAID 2/Alf/for_Thea/experiments/quantification_test 5_3D9/str_data/PMA/120/3D9_PMA_120image_hoescht187.TIF 3D9_PMA_120image_568186.tif	1750	8,976	0	preAnalysis	none	none	120 PMA	qt_5_3D9_man03	/Volumes/Promise RAID/Alf/for_Thea/experiments/quantification_test 5_3D9/3D9_5
446	174	8	120	PMA	151,154,154,156,156,157,157,156,156,154,154,153,153,152,152,151,151,144,144,143,143,142,142,141,141,142,142,143,143,144,144,147,147,151,	427,427,428,428,430,430,435,435,436,436,437,437,438,438,439,439,440,440,439,439,438,438,437,437,432,432,429,429,428,428,427,427,426,426,	/Volumes/Promise RAID 2/Alf/for_Thea/experiments/quantification_test 5_3D9/str_data/PMA/120/3D9_PMA_120image_hoescht187.TIF 3D9_PMA_120image_568186.tif	1750	8	0	preAnalysis	none	none	120 PMA	qt_5_3D9_man03	/Volumes/Promise RAID/Alf/for_Thea/experiments/quantification_test 5_3D9/3D9_5
447	205	10,38	120	PMA	583,585,585,586,586,585,585,584,584,582,582,576,576,574,574,573,573,572,572,571,571,572,572,573,573,574,574,575,575,576,576,578,578,583,	430,430,431,431,442,442,444,444,445,445,446,446,445,445,444,444,443,443,441,441,436,436,435,435,434,434,433,433,431,431,430,430,429,429,	/Volumes/Promise RAID 2/Alf/for_Thea/experiments/quantification_test 5_3D9/str_data/PMA/120/3D9_PMA_120image_hoescht187.TIF 3D9_PMA_120image_568186.tif	1750	10,38	0	preAnalysis	none	none	120 PMA	qt_5_3D9_man03	/Volumes/Promise RAID/Alf/for_Thea/experiments/quantification_test 5_3D9/3D9_5
448	235	16,081	120	PMA	818,821,821,823,823,824,824,825,825,824,824,825,825,826,826,825,825,824,824,821,821,820,820,817,817,815,815,814,814,813,813,812,812,811,811,810,810,811,811,812,812,814,814,817,817,818,	434,434,435,435,437,437,438,438,439,439,440,440,442,442,449,449,451,451,452,452,453,453,452,452,451,451,450,450,449,449,448,448,446,446,444,444,438,438,436,436,435,435,434,434,433,433,	/Volumes/Promise RAID 2/Alf/for_Thea/experiments/quantification_test 5_3D9/str_data/PMA/120/3D9_PMA_120image_hoescht187.TIF 3D9_PMA_120image_568186.tif	1750	16,081	0	preAnalysis	none	none	120 PMA	qt_5_3D9_man03	/Volumes/Promise RAID/Alf/for_Thea/experiments/quantification_test 5_3D9/3D9_5
449	213	9,465	120	PMA	627,630,630,631,631,632,632,631,631,630,630,628,628,624,624,622,622,620,620,619,619,618,618,619,619,620,620,621,621,622,622,623,623,627,	439,439,440,440,441,441,447,447,455,455,456,456,457,457,456,456,455,455,453,453,452,452,444,444,442,442,441,441,440,440,439,439,438,438,	/Volumes/Promise RAID 2/Alf/for_Thea/experiments/quantification_test 5_3D9/str_data/PMA/120/3D9_PMA_120image_hoescht187.TIF 3D9_PMA_120image_568186.tif	1750	9,465	0	preAnalysis	none	none	120 PMA	qt_5_3D9_man03	/Volumes/Promise RAID/Alf/for_Thea/experiments/quantification_test 5_3D9/3D9_5
450	239	12,921	120	PMA	1338,1340,1340,1341,1341,1342,1342,1343,1343,1342,1342,1341,1341,1340,1340,1339,1339,1338,1338,1331,1331,1329,1329,1327,1327,1326,1326,1325,1325,1326,1326,1327,1327,1328,1328,1329,1329,1331,1331,1338,	455,455,456,456,457,457,459,459,465,465,467,467,468,468,469,469,470,470,471,471,470,470,469,469,467,467,465,465,463,463,461,461,457,457,456,456,455,455,454,454,	/Volumes/Promise RAID 2/Alf/for_Thea/experiments/quantification_test 5_3D9/str_data/PMA/120/3D9_PMA_120image_hoescht187.TIF 3D9_PMA_120image_568186.tif	1750	12,921	0	preAnalysis	none	none	120 PMA	qt_5_3D9_man03	/Volumes/Promise RAID/Alf/for_Thea/experiments/quantification_test 5_3D9/3D9_5
451	163	1,963	120	PMA	58,59,59,60,60,61,61,62,62,61,61,60,60,56,56,55,55,53,53,47,47,46,46,47,47,46,46,45,45,46,46,47,47,50,50,51,51,52,52,58,	457,457,458,458,459,459,460,460,462,462,467,467,468,468,467,467,469,469,470,470,471,471,470,470,469,469,467,467,465,465,463,463,462,462,459,459,457,457,456,456,	/Volumes/Promise RAID 2/Alf/for_Thea/experiments/quantification_test 5_3D9/str_data/PMA/120/3D9_PMA_120image_hoescht187.TIF 3D9_PMA_120image_568186.tif	1750	1,963	0	preAnalysis	none	none	120 PMA	qt_5_3D9_man03	/Volumes/Promise RAID/Alf/for_Thea/experiments/quantification_test 5_3D9/3D9_5
452	165	5,236	120	PMA	271,273,273,274,274,275,275,273,273,272,272,271,271,270,270,264,264,262,262,261,261,262,262,263,263,264,264,267,267,271,	467,467,468,468,469,469,475,475,476,476,479,479,480,480,481,481,480,480,478,478,471,471,469,469,468,468,467,467,466,466,	/Volumes/Promise RAID 2/Alf/for_Thea/experiments/quantification_test 5_3D9/str_data/PMA/120/3D9_PMA_120image_hoescht187.TIF 3D9_PMA_120image_568186.tif	1750	5,236	0	preAnalysis	none	none	120 PMA	qt_5_3D9_man03	/Volumes/Promise RAID/Alf/for_Thea/experiments/quantification_test 5_3D9/3D9_5
453	197	13,482	120	PMA	460,461,461,462,462,463,463,464,464,463,463,462,462,461,461,460,460,459,459,457,457,453,453,451,451,450,450,449,449,450,450,451,451,452,452,454,454,460,	487,487,488,488,489,489,491,491,495,495,497,497,498,498,500,500,501,501,502,502,503,503,502,502,501,501,498,498,491,491,489,489,488,488,487,487,486,486,	/Volumes/Promise RAID 2/Alf/for_Thea/experiments/quantification_test 5_3D9/str_data/PMA/120/3D9_PMA_120image_hoescht187.TIF 3D9_PMA_120image_568186.tif	1750	13,482	0	preAnalysis	none	none	120 PMA	qt_5_3D9_man03	/Volumes/Promise RAID/Alf/for_Thea/experiments/quantification_test 5_3D9/3D9_5
454	181	10,785	120	PMA	292,293,293,294,294,293,293,294,294,293,293,292,292,291,291,285,285,283,283,282,282,281,281,280,280,279,279,280,280,281,281,282,282,283,283,292,	503,503,504,504,507,507,511,511,514,514,515,515,516,516,517,517,516,516,515,515,514,514,513,513,509,509,508,508,505,505,504,504,503,503,502,502,	/Volumes/Promise RAID 2/Alf/for_Thea/experiments/quantification_test 5_3D9/str_data/PMA/120/3D9_PMA_120image_hoescht187.TIF 3D9_PMA_120image_568186.tif	1750	10,785	0	preAnalysis	none	none	120 PMA	qt_5_3D9_man03	/Volumes/Promise RAID/Alf/for_Thea/experiments/quantification_test 5_3D9/3D9_5
455	225	12,871	120	PMA	544,546,546,547,547,548,548,549,549,550,550,549,549,548,548,547,547,545,545,544,544,543,543,542,542,540,540,538,538,535,535,534,534,533,533,534,534,535,535,536,536,539,539,544,	519,519,520,520,521,521,522,522,523,523,528,528,529,529,530,530,531,531,532,532,533,533,534,534,535,535,536,536,535,535,534,534,531,531,523,523,521,521,520,520,519,519,518,518,	/Volumes/Promise RAID 2/Alf/for_Thea/experiments/quantification_test 5_3D9/str_data/PMA/120/3D9_PMA_120image_hoescht187.TIF 3D9_PMA_120image_568186.tif	1750	12,871	0	preAnalysis	none	none	120 PMA	qt_5_3D9_man03	/Volumes/Promise RAID/Alf/for_Thea/experiments/quantification_test 5_3D9/3D9_5
456	236	10,237	120	PMA	1265,1267,1267,1268,1268,1269,1269,1268,1268,1267,1267,1266,1266,1265,1265,1263,1263,1260,1260,1257,1257,1256,1256,1255,1255,1254,1254,1253,1253,1254,1254,1255,1255,1256,1256,1257,1257,1259,1259,1265,	523,523,524,524,528,528,529,529,537,537,538,538,539,539,540,540,541,541,540,540,539,539,538,538,537,537,535,535,528,528,526,526,525,525,524,524,523,523,522,522,	/Volumes/Promise RAID 2/Alf/for_Thea/experiments/quantification_test 5_3D9/str_data/PMA/120/3D9_PMA_120image_hoescht187.TIF 3D9_PMA_120image_568186.tif	1750	10,237	0	preAnalysis	none	none	120 PMA	qt_5_3D9_man03	/Volumes/Promise RAID/Alf/for_Thea/experiments/quantification_test 5_3D9/3D9_5
457	220	16,014	120	PMA	746,747,747,748,748,749,749,750,750,751,751,750,750,751,751,750,750,749,749,747,747,741,741,739,739,738,738,737,737,736,736,735,735,736,736,737,737,738,738,740,740,746,	540,540,541,541,542,542,544,544,548,548,550,550,551,551,552,552,554,554,556,556,557,557,556,556,555,555,553,553,552,552,549,549,548,548,542,542,541,541,540,540,539,539,	/Volumes/Promise RAID 2/Alf/for_Thea/experiments/quantification_test 5_3D9/str_data/PMA/120/3D9_PMA_120image_hoescht187.TIF 3D9_PMA_120image_568186.tif	1750	16,014	0	preAnalysis	none	none	120 PMA	qt_5_3D9_man03	/Volumes/Promise RAID/Alf/for_Thea/experiments/quantification_test 5_3D9/3D9_5
458	230	13,565	120	PMA	1199,1200,1200,1202,1202,1204,1204,1205,1205,1206,1206,1205,1205,1204,1204,1203,1203,1196,1196,1193,1193,1191,1191,1190,1190,1189,1189,1188,1188,1189,1189,1190,1190,1191,1191,1192,1192,1194,1194,1199,	541,541,542,542,543,543,545,545,549,549,550,550,554,554,555,555,557,557,556,556,555,555,553,553,552,552,550,550,545,545,544,544,543,543,542,542,541,541,540,540,	/Volumes/Promise RAID 2/Alf/for_Thea/experiments/quantification_test 5_3D9/str_data/PMA/120/3D9_PMA_120image_hoescht187.TIF 3D9_PMA_120image_568186.tif	1750	13,565	0	preAnalysis	none	none	120 PMA	qt_5_3D9_man03	/Volumes/Promise RAID/Alf/for_Thea/experiments/quantification_test 5_3D9/3D9_5
459	197	6,66	120	PMA	415,417,417,418,418,419,419,418,418,416,416,413,413,412,412,409,409,408,408,407,407,406,406,405,405,406,406,407,407,408,408,409,409,410,410,413,413,415,	543,543,545,545,553,553,557,557,559,559,560,560,561,561,560,560,559,559,558,558,557,557,555,555,549,549,547,547,546,546,545,545,544,544,543,543,542,542,	/Volumes/Promise RAID 2/Alf/for_Thea/experiments/quantification_test 5_3D9/str_data/PMA/120/3D9_PMA_120image_hoescht187.TIF 3D9_PMA_120image_568186.tif	1750	6,66	0	preAnalysis	none	none	120 PMA	qt_5_3D9_man03	/Volumes/Promise RAID/Alf/for_Thea/experiments/quantification_test 5_3D9/3D9_5
460	376	53,521	120	PMA	59,61,61,62,62,66,66,68,68,69,69,71,71,72,72,73,73,74,74,77,77,80,80,77,77,71,71,65,65,60,60,58,58,50,50,47,47,46,46,45,45,44,44,45,45,44,44,46,46,48,48,52,52,57,57,59,	564,564,565,565,566,566,567,567,568,568,569,569,570,570,572,572,575,575,577,577,578,578,579,579,578,578,579,579,580,580,579,579,578,578,579,579,578,578,577,577,576,576,572,572,570,570,567,567,566,566,565,565,564,564,563,563,	/Volumes/Promise RAID 2/Alf/for_Thea/experiments/quantification_test 5_3D9/str_data/PMA/120/3D9_PMA_120image_hoescht187.TIF 3D9_PMA_120image_568186.tif	1750	53,521	0	preAnalysis	none	none	120 PMA	qt_5_3D9_man03	/Volumes/Promise RAID/Alf/for_Thea/experiments/quantification_test 5_3D9/3D9_5
461	193	14,425	120	PMA	892,895,895,896,896,897,897,898,898,897,897,896,896,895,895,893,893,887,887,885,885,884,884,883,883,882,882,883,883,884,884,885,885,887,887,892,	583,583,584,584,585,585,587,587,593,593,594,594,595,595,596,596,597,597,596,596,595,595,594,594,592,592,586,586,585,585,584,584,583,583,582,582,	/Volumes/Promise RAID 2/Alf/for_Thea/experiments/quantification_test 5_3D9/str_data/PMA/120/3D9_PMA_120image_hoescht187.TIF 3D9_PMA_120image_568186.tif	1750	14,425	0	preAnalysis	none	none	120 PMA	qt_5_3D9_man03	/Volumes/Promise RAID/Alf/for_Thea/experiments/quantification_test 5_3D9/3D9_5
462	314	35,073	120	PMA	1154,1158,1158,1160,1160,1161,1161,1163,1163,1165,1165,1173,1173,1172,1172,1171,1171,1170,1170,1169,1169,1165,1165,1163,1163,1162,1162,1161,1161,1160,1160,1159,1159,1158,1158,1157,1157,1154,1154,1153,1153,1152,1152,1151,1151,1150,1150,1149,1149,1148,1148,1147,1147,1148,1148,1150,1150,1151,1151,1153,1153,1154,	584,584,585,585,586,586,587,587,588,588,587,587,590,590,591,591,592,592,597,597,598,598,597,597,598,598,599,599,600,600,601,601,602,602,603,603,605,605,603,603,601,601,600,600,595,595,594,594,593,593,592,592,589,589,587,587,586,586,584,584,583,583,	/Volumes/Promise RAID 2/Alf/for_Thea/experiments/quantification_test 5_3D9/str_data/PMA/120/3D9_PMA_120image_hoescht187.TIF 3D9_PMA_120image_568186.tif	1750	35,073	0	preAnalysis	none	none	120 PMA	qt_5_3D9_man03	/Volumes/Promise RAID/Alf/for_Thea/experiments/quantification_test 5_3D9/3D9_5
463	249	12,659	120	PMA	1204,1206,1206,1208,1208,1209,1209,1210,1210,1211,1211,1210,1210,1209,1209,1208,1208,1207,1207,1201,1201,1200,1200,1199,1199,1198,1198,1197,1197,1196,1196,1195,1195,1194,1194,1193,1193,1192,1192,1193,1193,1194,1194,1195,1195,1204,	590,590,591,591,592,592,594,594,598,598,600,600,604,604,605,605,606,606,607,607,606,606,605,605,604,604,603,603,601,601,600,600,599,599,598,598,596,596,592,592,591,591,590,590,589,589,	/Volumes/Promise RAID 2/Alf/for_Thea/experiments/quantification_test 5_3D9/str_data/PMA/120/3D9_PMA_120image_hoescht187.TIF 3D9_PMA_120image_568186.tif	1750	12,659	0	preAnalysis	none	none	120 PMA	qt_5_3D9_man03	/Volumes/Promise RAID/Alf/for_Thea/experiments/quantification_test 5_3D9/3D9_5
464	385	31,87	120	PMA	358,360,360,361,361,362,362,363,363,362,362,361,361,360,360,356,356,354,354,353,353,351,351,350,350,349,349,348,348,346,346,345,345,342,342,340,340,339,339,338,338,337,337,338,338,339,339,340,340,341,341,343,343,344,344,346,346,347,347,348,348,349,349,350,350,358,	597,597,596,596,600,600,602,602,605,605,606,606,607,607,611,611,612,612,613,613,614,614,615,615,616,616,617,617,618,618,619,619,620,620,619,619,618,618,615,615,612,612,611,611,609,609,607,607,605,605,604,604,602,602,601,601,600,600,599,599,597,597,596,596,595,595,	/Volumes/Promise RAID 2/Alf/for_Thea/experiments/quantification_test 5_3D9/str_data/PMA/120/3D9_PMA_120image_hoescht187.TIF 3D9_PMA_120image_568186.tif	1750	31,87	0	preAnalysis	none	none	120 PMA	qt_5_3D9_man03	/Volumes/Promise RAID/Alf/for_Thea/experiments/quantification_test 5_3D9/3D9_5
465	220	19,682	120	PMA	791,794,794,795,795,796,796,797,797,798,798,799,799,800,800,799,799,798,798,796,796,795,795,793,793,789,789,787,787,785,785,783,783,782,782,783,783,784,784,785,785,788,788,791,	598,598,599,599,600,600,601,601,603,603,607,607,608,608,609,609,610,610,611,611,612,612,613,613,614,614,613,613,612,612,611,611,610,610,601,601,600,600,599,599,598,598,597,597,	/Volumes/Promise RAID 2/Alf/for_Thea/experiments/quantification_test 5_3D9/str_data/PMA/120/3D9_PMA_120image_hoescht187.TIF 3D9_PMA_120image_568186.tif	1750	19,682	0	preAnalysis	none	none	120 PMA	qt_5_3D9_man03	/Volumes/Promise RAID/Alf/for_Thea/experiments/quantification_test 5_3D9/3D9_5
466	161	6,161	120	PMA	242,244,244,245,245,246,246,247,247,246,246,244,244,242,242,238,238,236,236,235,235,234,234,235,235,237,237,242,	601,601,602,602,603,603,604,604,611,611,613,613,614,614,615,615,614,614,613,613,611,611,603,603,601,601,600,600,	/Volumes/Promise RAID 2/Alf/for_Thea/experiments/quantification_test 5_3D9/str_data/PMA/120/3D9_PMA_120image_hoescht187.TIF 3D9_PMA_120image_568186.tif	1750	6,161	0	preAnalysis	none	none	120 PMA	qt_5_3D9_man03	/Volumes/Promise RAID/Alf/for_Thea/experiments/quantification_test 5_3D9/3D9_5
467	262	9,466	120	PMA	1326,1329,1329,1330,1330,1331,1331,1332,1332,1331,1331,1330,1330,1329,1329,1328,1328,1326,1326,1324,1324,1321,1321,1320,1320,1316,1316,1314,1314,1313,1313,1312,1312,1313,1313,1314,1314,1316,1316,1317,1317,1318,1318,1319,1319,1320,1320,1322,1322,1326,	603,603,604,604,605,605,608,608,611,611,614,614,616,616,617,617,618,618,619,619,620,620,621,621,620,620,619,619,617,617,616,616,611,611,610,610,609,609,608,608,606,606,605,605,604,604,603,603,602,602,	/Volumes/Promise RAID 2/Alf/for_Thea/experiments/quantification_test 5_3D9/str_data/PMA/120/3D9_PMA_120image_hoescht187.TIF 3D9_PMA_120image_568186.tif	1750	9,466	0	preAnalysis	none	none	120 PMA	qt_5_3D9_man03	/Volumes/Promise RAID/Alf/for_Thea/experiments/quantification_test 5_3D9/3D9_5
468	224	15,33	120	PMA	985,988,988,989,989,990,990,991,991,990,990,989,989,988,988,986,986,981,981,978,978,976,976,975,975,974,974,973,973,974,974,975,975,976,976,978,978,980,980,984,984,985,	606,606,607,607,609,609,612,612,616,616,619,619,620,620,621,621,622,622,621,621,620,620,618,618,617,617,615,615,612,612,610,610,609,609,608,608,607,607,606,606,605,605,	/Volumes/Promise RAID 2/Alf/for_Thea/experiments/quantification_test 5_3D9/str_data/PMA/120/3D9_PMA_120image_hoescht187.TIF 3D9_PMA_120image_568186.tif	1750	15,33	0	preAnalysis	none	none	120 PMA	qt_5_3D9_man03	/Volumes/Promise RAID/Alf/for_Thea/experiments/quantification_test 5_3D9/3D9_5
469	218	9,101	120	PMA	493,494,494,495,495,496,496,495,495,494,494,493,493,486,486,485,485,484,484,483,483,482,482,481,481,482,482,483,483,484,484,485,485,486,486,493,	611,611,612,612,620,620,625,625,626,626,627,627,628,628,627,627,626,626,625,625,624,624,622,622,617,617,614,614,613,613,612,612,611,611,610,610,	/Volumes/Promise RAID 2/Alf/for_Thea/experiments/quantification_test 5_3D9/str_data/PMA/120/3D9_PMA_120image_hoescht187.TIF 3D9_PMA_120image_568186.tif	1750	9,101	0	preAnalysis	none	none	120 PMA	qt_5_3D9_man03	/Volumes/Promise RAID/Alf/for_Thea/experiments/quantification_test 5_3D9/3D9_5
470	244	14,52	120	PMA	1167,1169,1169,1170,1170,1171,1171,1172,1172,1173,1173,1172,1172,1171,1171,1170,1170,1169,1169,1167,1167,1162,1162,1161,1161,1159,1159,1158,1158,1157,1157,1156,1156,1155,1155,1156,1156,1157,1157,1158,1158,1161,1161,1167,	618,618,619,619,620,620,622,622,625,625,627,627,630,630,632,632,633,633,634,634,635,635,634,634,633,633,632,632,630,630,629,629,627,627,622,622,620,620,619,619,618,618,617,617,	/Volumes/Promise RAID 2/Alf/for_Thea/experiments/quantification_test 5_3D9/str_data/PMA/120/3D9_PMA_120image_hoescht187.TIF 3D9_PMA_120image_568186.tif	1750	14,52	0	preAnalysis	none	none	120 PMA	qt_5_3D9_man03	/Volumes/Promise RAID/Alf/for_Thea/experiments/quantification_test 5_3D9/3D9_5
471	217	19,94	120	PMA	1098,1099,1099,1100,1100,1101,1101,1102,1102,1103,1103,1102,1102,1101,1101,1100,1100,1098,1098,1096,1096,1095,1095,1090,1090,1089,1089,1088,1088,1087,1087,1086,1086,1087,1087,1088,1088,1089,1089,1091,1091,1094,1094,1098,	621,621,622,622,623,623,624,624,625,625,632,632,633,633,634,634,635,635,636,636,637,637,636,636,635,635,634,634,633,633,632,632,626,626,624,624,623,623,622,622,621,621,620,620,	/Volumes/Promise RAID 2/Alf/for_Thea/experiments/quantification_test 5_3D9/str_data/PMA/120/3D9_PMA_120image_hoescht187.TIF 3D9_PMA_120image_568186.tif	1750	19,94	0	preAnalysis	none	none	120 PMA	qt_5_3D9_man03	/Volumes/Promise RAID/Alf/for_Thea/experiments/quantification_test 5_3D9/3D9_5
472	164	26,122	120	PMA	136,138,138,139,139,140,140,141,141,140,140,139,139,137,137,135,135,129,129,128,128,127,127,126,126,125,125,126,126,127,127,130,130,131,131,134,134,136,	629,629,630,630,631,631,632,632,637,637,639,639,640,640,641,641,642,642,641,641,640,640,639,639,630,630,629,629,630,630,631,631,630,630,629,629,628,628,	/Volumes/Promise RAID 2/Alf/for_Thea/experiments/quantification_test 5_3D9/str_data/PMA/120/3D9_PMA_120image_hoescht187.TIF 3D9_PMA_120image_568186.tif	1750	26,122	0	preAnalysis	none	none	120 PMA	qt_5_3D9_man03	/Volumes/Promise RAID/Alf/for_Thea/experiments/quantification_test 5_3D9/3D9_5
473	206	16,762	120	PMA	1061,1065,1065,1067,1067,1068,1068,1067,1067,1066,1066,1065,1065,1064,1064,1058,1058,1056,1056,1055,1055,1054,1054,1053,1053,1052,1052,1053,1053,1054,1054,1055,1055,1056,1056,1060,1060,1061,	635,635,637,637,640,640,646,646,648,648,649,649,650,650,651,651,650,650,648,648,647,647,646,646,644,644,639,639,638,638,637,637,636,636,635,635,634,634,	/Volumes/Promise RAID 2/Alf/for_Thea/experiments/quantification_test 5_3D9/str_data/PMA/120/3D9_PMA_120image_hoescht187.TIF 3D9_PMA_120image_568186.tif	1750	16,762	0	preAnalysis	none	none	120 PMA	qt_5_3D9_man03	/Volumes/Promise RAID/Alf/for_Thea/experiments/quantification_test 5_3D9/3D9_5
474	242	14,037	120	PMA	607,608,608,609,609,611,611,612,612,613,613,614,614,615,615,614,614,613,613,612,612,611,611,609,609,606,606,604,604,602,602,601,601,600,600,601,601,600,600,601,601,602,602,603,603,604,604,605,605,607,	638,638,639,639,640,640,641,641,642,642,643,643,645,645,652,652,654,654,655,655,656,656,657,657,658,658,659,659,658,658,657,657,655,655,650,650,648,648,643,643,642,642,641,641,640,640,639,639,637,637,	/Volumes/Promise RAID 2/Alf/for_Thea/experiments/quantification_test 5_3D9/str_data/PMA/120/3D9_PMA_120image_hoescht187.TIF 3D9_PMA_120image_568186.tif	1750	14,037	0	preAnalysis	none	none	120 PMA	qt_5_3D9_man03	/Volumes/Promise RAID/Alf/for_Thea/experiments/quantification_test 5_3D9/3D9_5
475	249	11,116	120	PMA	1026,1027,1027,1028,1028,1029,1029,1030,1030,1029,1029,1028,1028,1027,1027,1026,1026,1024,1024,1022,1022,1019,1019,1017,1017,1015,1015,1013,1013,1012,1012,1011,1011,1012,1012,1013,1013,1014,1014,1015,1015,1016,1016,1017,1017,1026,	651,651,652,652,653,653,655,655,659,659,662,662,663,663,664,664,665,665,666,666,667,667,668,668,667,667,666,666,664,664,662,662,661,661,657,657,655,655,653,653,652,652,651,651,650,650,	/Volumes/Promise RAID 2/Alf/for_Thea/experiments/quantification_test 5_3D9/str_data/PMA/120/3D9_PMA_120image_hoescht187.TIF 3D9_PMA_120image_568186.tif	1750	11,116	0	preAnalysis	none	none	120 PMA	qt_5_3D9_man03	/Volumes/Promise RAID/Alf/for_Thea/experiments/quantification_test 5_3D9/3D9_5
476	228	13,825	120	PMA	881,882,882,883,883,885,885,886,886,887,887,888,888,887,887,886,886,885,885,884,884,878,878,876,876,875,875,874,874,872,872,871,871,870,870,871,871,872,872,873,873,874,874,881,	652,652,653,653,654,654,656,656,657,657,658,658,664,664,665,665,666,666,667,667,668,668,667,667,666,666,665,665,664,664,662,662,661,661,656,656,655,655,654,654,652,652,651,651,	/Volumes/Promise RAID 2/Alf/for_Thea/experiments/quantification_test 5_3D9/str_data/PMA/120/3D9_PMA_120image_hoescht187.TIF 3D9_PMA_120image_568186.tif	1750	13,825	0	preAnalysis	none	none	120 PMA	qt_5_3D9_man03	/Volumes/Promise RAID/Alf/for_Thea/experiments/quantification_test 5_3D9/3D9_5
477	244	14,295	120	PMA	942,944,944,945,945,944,944,943,943,941,941,939,939,930,930,929,929,928,928,927,927,928,928,929,929,930,930,931,931,932,932,933,933,934,934,935,935,942,	669,669,670,670,679,679,681,681,683,683,684,684,685,685,684,684,683,683,682,682,676,676,675,675,674,674,673,673,672,672,671,671,670,670,669,669,668,668,	/Volumes/Promise RAID 2/Alf/for_Thea/experiments/quantification_test 5_3D9/str_data/PMA/120/3D9_PMA_120image_hoescht187.TIF 3D9_PMA_120image_568186.tif	1750	14,295	0	preAnalysis	none	none	120 PMA	qt_5_3D9_man03	/Volumes/Promise RAID/Alf/for_Thea/experiments/quantification_test 5_3D9/3D9_5
478	211	7,431	120	PMA	441,443,443,444,444,445,445,446,446,447,447,446,446,445,445,440,440,434,434,433,433,432,432,431,431,432,432,433,433,434,434,435,435,441,	698,698,699,699,700,700,701,701,703,703,709,709,711,711,712,712,713,713,712,712,711,711,710,710,702,702,700,700,699,699,698,698,697,697,	/Volumes/Promise RAID 2/Alf/for_Thea/experiments/quantification_test 5_3D9/str_data/PMA/120/3D9_PMA_120image_hoescht187.TIF 3D9_PMA_120image_568186.tif	1750	7,431	0	preAnalysis	none	none	120 PMA	qt_5_3D9_man03	/Volumes/Promise RAID/Alf/for_Thea/experiments/quantification_test 5_3D9/3D9_5
479	151	5,298	120	PMA	124,126,126,127,127,128,128,129,129,130,130,129,129,127,127,123,123,119,119,117,117,116,116,115,115,116,116,117,117,118,118,121,121,124,	700,700,701,701,702,702,703,703,704,704,710,710,712,712,713,713,711,711,710,710,709,709,707,707,705,705,702,702,701,701,700,700,699,699,	/Volumes/Promise RAID 2/Alf/for_Thea/experiments/quantification_test 5_3D9/str_data/PMA/120/3D9_PMA_120image_hoescht187.TIF 3D9_PMA_120image_568186.tif	1750	5,298	0	preAnalysis	none	none	120 PMA	qt_5_3D9_man03	/Volumes/Promise RAID/Alf/for_Thea/experiments/quantification_test 5_3D9/3D9_5
480	179	6,704	120	PMA	405,406,406,407,407,408,408,409,409,408,408,407,407,406,406,404,404,400,400,397,397,396,396,395,395,396,396,397,397,398,398,399,399,405,	725,725,726,726,727,727,729,729,735,735,737,737,738,738,739,739,740,740,739,739,738,738,736,736,730,730,728,728,726,726,725,725,724,724,	/Volumes/Promise RAID 2/Alf/for_Thea/experiments/quantification_test 5_3D9/str_data/PMA/120/3D9_PMA_120image_hoescht187.TIF 3D9_PMA_120image_568186.tif	1750	6,704	0	preAnalysis	none	none	120 PMA	qt_5_3D9_man03	/Volumes/Promise RAID/Alf/for_Thea/experiments/quantification_test 5_3D9/3D9_5
481	279	31,323	120	PMA	1270,1273,1273,1278,1278,1287,1287,1288,1288,1286,1286,1287,1287,1285,1285,1277,1277,1275,1275,1273,1273,1272,1272,1271,1271,1270,1270,1271,1271,1270,1270,1268,1268,1267,1267,1268,1268,1267,1267,1266,1266,1265,1265,1264,1264,1263,1263,1265,1265,1266,1266,1267,1267,1270,	731,731,732,732,730,730,732,732,734,734,736,736,738,738,739,739,740,740,741,741,743,743,747,747,750,750,753,753,755,755,757,757,758,758,757,757,751,751,748,748,743,743,740,740,739,739,736,736,733,733,731,731,730,730,	/Volumes/Promise RAID 2/Alf/for_Thea/experiments/quantification_test 5_3D9/str_data/PMA/120/3D9_PMA_120image_hoescht187.TIF 3D9_PMA_120image_568186.tif	1750	31,323	0	preAnalysis	none	none	120 PMA	qt_5_3D9_man03	/Volumes/Promise RAID/Alf/for_Thea/experiments/quantification_test 5_3D9/3D9_5
482	224	9,5	120	PMA	649,652,652,653,653,654,654,655,655,654,654,653,653,650,650,641,641,639,639,638,638,639,639,640,640,641,641,642,642,644,644,649,	784,784,785,785,787,787,791,791,795,795,797,797,798,798,799,799,798,798,796,796,789,789,787,787,786,786,785,785,784,784,783,783,	/Volumes/Promise RAID 2/Alf/for_Thea/experiments/quantification_test 5_3D9/str_data/PMA/120/3D9_PMA_120image_hoescht187.TIF 3D9_PMA_120image_568186.tif	1750	9,5	0	preAnalysis	none	none	120 PMA	qt_5_3D9_man03	/Volumes/Promise RAID/Alf/for_Thea/experiments/quantification_test 5_3D9/3D9_5
483	159	3,321	120	PMA	120,122,122,123,123,122,122,121,121,120,120,119,119,117,117,114,114,112,112,111,111,110,110,111,111,112,112,113,113,114,114,120,	792,792,794,794,798,798,802,802,804,804,805,805,806,806,807,807,806,806,804,804,801,801,797,797,794,794,793,793,792,792,791,791,	/Volumes/Promise RAID 2/Alf/for_Thea/experiments/quantification_test 5_3D9/str_data/PMA/120/3D9_PMA_120image_hoescht187.TIF 3D9_PMA_120image_568186.tif	1750	3,321	0	preAnalysis	none	none	120 PMA	qt_5_3D9_man03	/Volumes/Promise RAID/Alf/for_Thea/experiments/quantification_test 5_3D9/3D9_5
484	161	6,161	120	PMA	180,181,181,182,182,183,183,182,182,181,181,180,180,172,172,171,171,170,170,169,169,170,170,171,171,172,172,174,174,180,	794,794,795,795,797,797,804,804,805,805,806,806,807,807,806,806,805,805,803,803,800,800,797,797,795,795,794,794,793,793,	/Volumes/Promise RAID 2/Alf/for_Thea/experiments/quantification_test 5_3D9/str_data/PMA/120/3D9_PMA_120image_hoescht187.TIF 3D9_PMA_120image_568186.tif	1750	6,161	0	preAnalysis	none	none	120 PMA	qt_5_3D9_man03	/Volumes/Promise RAID/Alf/for_Thea/experiments/quantification_test 5_3D9/3D9_5
485	176	5,364	120	PMA	372,374,374,375,375,376,376,375,375,374,374,368,368,364,364,363,363,362,362,363,363,364,364,366,366,372,	797,797,799,799,804,804,808,808,810,810,811,811,810,810,809,809,808,808,800,800,798,798,797,797,796,796,	/Volumes/Promise RAID 2/Alf/for_Thea/experiments/quantification_test 5_3D9/str_data/PMA/120/3D9_PMA_120image_hoescht187.TIF 3D9_PMA_120image_568186.tif	1750	5,364	0	preAnalysis	none	none	120 PMA	qt_5_3D9_man03	/Volumes/Promise RAID/Alf/for_Thea/experiments/quantification_test 5_3D9/3D9_5
486	218	10,202	120	PMA	714,716,716,717,717,718,718,719,719,720,720,719,719,720,720,719,719,718,718,717,717,716,716,714,714,709,709,707,707,706,706,705,705,704,704,703,703,704,704,705,705,706,706,713,713,714,	808,808,809,809,810,810,811,811,814,814,815,815,816,816,817,817,820,820,821,821,822,822,823,823,824,824,823,823,822,822,821,821,820,820,818,818,812,812,810,810,809,809,808,808,807,807,	/Volumes/Promise RAID 2/Alf/for_Thea/experiments/quantification_test 5_3D9/str_data/PMA/120/3D9_PMA_120image_hoescht187.TIF 3D9_PMA_120image_568186.tif	1750	10,202	0	preAnalysis	none	none	120 PMA	qt_5_3D9_man03	/Volumes/Promise RAID/Alf/for_Thea/experiments/quantification_test 5_3D9/3D9_5
487	158	4,861	120	PMA	275,276,276,277,277,278,278,277,277,276,276,275,275,274,274,268,268,267,267,266,266,265,265,266,266,267,267,268,268,270,270,275,	815,815,816,816,817,817,825,825,826,826,827,827,828,828,829,829,828,828,827,827,825,825,820,820,818,818,816,816,815,815,814,814,	/Volumes/Promise RAID 2/Alf/for_Thea/experiments/quantification_test 5_3D9/str_data/PMA/120/3D9_PMA_120image_hoescht187.TIF 3D9_PMA_120image_568186.tif	1750	4,861	0	preAnalysis	none	none	120 PMA	qt_5_3D9_man03	/Volumes/Promise RAID/Alf/for_Thea/experiments/quantification_test 5_3D9/3D9_5
488	145	0	120	PMA	27,28,28,29,29,28,28,27,27,21,21,15,15,14,14,13,13,12,12,13,13,14,14,27,	825,825,828,828,831,831,832,832,833,833,834,834,833,833,832,832,831,831,826,826,825,825,824,824,	/Volumes/Promise RAID 2/Alf/for_Thea/experiments/quantification_test 5_3D9/str_data/PMA/120/3D9_PMA_120image_hoescht187.TIF 3D9_PMA_120image_568186.tif	1750	0	0	preAnalysis	none	none	120 PMA	qt_5_3D9_man03	/Volumes/Promise RAID/Alf/for_Thea/experiments/quantification_test 5_3D9/3D9_5
489	205	14,595	120	PMA	611,613,613,614,614,615,615,616,616,615,615,616,616,615,615,614,614,613,613,611,611,604,604,601,601,600,600,599,599,598,598,599,599,600,600,602,602,604,604,607,607,611,	832,832,833,833,834,834,836,836,838,838,839,839,840,840,841,841,843,843,845,845,846,846,845,845,844,844,843,843,841,841,837,837,835,835,834,834,833,833,832,832,831,831,	/Volumes/Promise RAID 2/Alf/for_Thea/experiments/quantification_test 5_3D9/str_data/PMA/120/3D9_PMA_120image_hoescht187.TIF 3D9_PMA_120image_568186.tif	1750	14,595	0	preAnalysis	none	none	120 PMA	qt_5_3D9_man03	/Volumes/Promise RAID/Alf/for_Thea/experiments/quantification_test 5_3D9/3D9_5
490	253	11,573	120	PMA	1256,1260,1260,1262,1262,1263,1263,1264,1264,1265,1265,1264,1264,1263,1263,1262,1262,1261,1261,1258,1258,1253,1253,1251,1251,1250,1250,1249,1249,1248,1248,1247,1247,1248,1248,1249,1249,1250,1250,1252,1252,1253,1253,1256,	835,835,836,836,837,837,839,839,842,842,847,847,848,848,850,850,851,851,852,852,853,853,852,852,851,851,850,850,849,849,845,845,844,844,841,841,839,839,836,836,835,835,834,834,	/Volumes/Promise RAID 2/Alf/for_Thea/experiments/quantification_test 5_3D9/str_data/PMA/120/3D9_PMA_120image_hoescht187.TIF 3D9_PMA_120image_568186.tif	1750	11,573	0	preAnalysis	none	none	120 PMA	qt_5_3D9_man03	/Volumes/Promise RAID/Alf/for_Thea/experiments/quantification_test 5_3D9/3D9_5
491	267	15,071	120	PMA	798,799,799,800,800,801,801,802,802,803,803,804,804,805,805,804,804,803,803,802,802,801,801,800,800,799,799,797,797,796,796,793,793,791,791,790,790,791,791,790,790,789,789,790,790,791,791,792,792,798,	847,847,848,848,849,849,850,850,852,852,853,853,855,855,861,861,862,862,863,863,865,865,866,866,867,867,868,868,869,869,868,868,867,867,865,865,858,858,857,857,852,852,851,851,848,848,847,847,846,846,	/Volumes/Promise RAID 2/Alf/for_Thea/experiments/quantification_test 5_3D9/str_data/PMA/120/3D9_PMA_120image_hoescht187.TIF 3D9_PMA_120image_568186.tif	1750	15,071	0	preAnalysis	none	none	120 PMA	qt_5_3D9_man03	/Volumes/Promise RAID/Alf/for_Thea/experiments/quantification_test 5_3D9/3D9_5
492	196	5,061	120	PMA	384,386,386,387,387,389,389,390,390,391,391,390,390,389,389,388,388,386,386,382,382,379,379,376,376,375,375,374,374,373,373,374,374,375,375,376,376,377,377,379,379,384,	852,852,853,853,854,854,856,856,858,858,860,860,863,863,864,864,865,865,866,866,865,865,864,864,863,863,862,862,860,860,857,857,855,855,854,854,853,853,852,852,851,851,	/Volumes/Promise RAID 2/Alf/for_Thea/experiments/quantification_test 5_3D9/str_data/PMA/120/3D9_PMA_120image_hoescht187.TIF 3D9_PMA_120image_568186.tif	1750	5,061	0	preAnalysis	none	none	120 PMA	qt_5_3D9_man03	/Volumes/Promise RAID/Alf/for_Thea/experiments/quantification_test 5_3D9/3D9_5
493	188	5,872	120	PMA	460,461,461,462,462,463,463,464,464,463,463,462,462,460,460,457,457,454,454,452,452,451,451,450,450,449,449,450,450,451,451,453,453,460,	883,883,884,884,885,885,891,891,894,894,896,896,897,897,898,898,897,897,896,896,895,895,894,894,892,892,886,886,885,885,883,883,882,882,	/Volumes/Promise RAID 2/Alf/for_Thea/experiments/quantification_test 5_3D9/str_data/PMA/120/3D9_PMA_120image_hoescht187.TIF 3D9_PMA_120image_568186.tif	1750	5,872	0	preAnalysis	none	none	120 PMA	qt_5_3D9_man03	/Volumes/Promise RAID/Alf/for_Thea/experiments/quantification_test 5_3D9/3D9_5
494	238	11,697	120	PMA	1200,1202,1202,1203,1203,1204,1204,1205,1205,1204,1204,1203,1203,1202,1202,1199,1199,1190,1190,1189,1189,1188,1188,1187,1187,1186,1186,1187,1187,1188,1188,1189,1189,1192,1192,1200,	885,885,886,886,887,887,889,889,895,895,896,896,897,897,898,898,899,899,898,898,897,897,896,896,894,894,888,888,887,887,886,886,885,885,884,884,	/Volumes/Promise RAID 2/Alf/for_Thea/experiments/quantification_test 5_3D9/str_data/PMA/120/3D9_PMA_120image_hoescht187.TIF 3D9_PMA_120image_568186.tif	1750	11,697	0	preAnalysis	none	none	120 PMA	qt_5_3D9_man03	/Volumes/Promise RAID/Alf/for_Thea/experiments/quantification_test 5_3D9/3D9_5
495	220	13,818	120	PMA	993,995,995,996,996,997,997,998,998,997,997,996,996,995,995,987,987,985,985,983,983,982,982,981,981,980,980,981,981,982,982,984,984,985,985,993,	893,893,894,894,895,895,897,897,903,903,905,905,906,906,907,907,906,906,905,905,904,904,903,903,901,901,896,896,895,895,894,894,893,893,892,892,	/Volumes/Promise RAID 2/Alf/for_Thea/experiments/quantification_test 5_3D9/str_data/PMA/120/3D9_PMA_120image_hoescht187.TIF 3D9_PMA_120image_568186.tif	1750	13,818	0	preAnalysis	none	none	120 PMA	qt_5_3D9_man03	/Volumes/Promise RAID/Alf/for_Thea/experiments/quantification_test 5_3D9/3D9_5
496	220	13,164	120	PMA	1067,1068,1068,1070,1070,1071,1071,1072,1072,1073,1073,1072,1072,1071,1071,1069,1069,1063,1063,1062,1062,1060,1060,1059,1059,1058,1058,1057,1057,1058,1058,1059,1059,1060,1060,1062,1062,1067,	937,937,938,938,939,939,941,941,942,942,948,948,951,951,953,953,954,954,953,953,952,952,950,950,947,947,944,944,941,941,939,939,938,938,937,937,936,936,	/Volumes/Promise RAID 2/Alf/for_Thea/experiments/quantification_test 5_3D9/str_data/PMA/120/3D9_PMA_120image_hoescht187.TIF 3D9_PMA_120image_568186.tif	1750	13,164	0	preAnalysis	none	none	120 PMA	qt_5_3D9_man03	/Volumes/Promise RAID/Alf/for_Thea/experiments/quantification_test 5_3D9/3D9_5
497	245	13,939	120	PMA	987,990,990,991,991,990,990,989,989,988,988,986,986,984,984,979,979,977,977,976,976,975,975,974,974,975,975,976,976,978,978,987,	942,942,943,943,952,952,953,953,955,955,956,956,957,957,958,958,957,957,956,956,955,955,953,953,944,944,943,943,942,942,941,941,	/Volumes/Promise RAID 2/Alf/for_Thea/experiments/quantification_test 5_3D9/str_data/PMA/120/3D9_PMA_120image_hoescht187.TIF 3D9_PMA_120image_568186.tif	1750	13,939	0	preAnalysis	none	none	120 PMA	qt_5_3D9_man03	/Volumes/Promise RAID/Alf/for_Thea/experiments/quantification_test 5_3D9/3D9_5
498	197	15,797	120	PMA	608,609,609,610,610,611,611,612,612,613,613,614,614,613,613,612,612,611,611,608,608,606,606,603,603,602,602,601,601,600,600,599,599,600,600,601,601,602,602,603,603,608,	946,946,947,947,948,948,949,949,951,951,953,953,958,958,959,959,961,961,962,962,963,963,962,962,961,961,960,960,957,957,953,953,950,950,948,948,947,947,946,946,945,945,	/Volumes/Promise RAID 2/Alf/for_Thea/experiments/quantification_test 5_3D9/str_data/PMA/120/3D9_PMA_120image_hoescht187.TIF 3D9_PMA_120image_568186.tif	1750	15,797	0	preAnalysis	none	none	120 PMA	qt_5_3D9_man03	/Volumes/Promise RAID/Alf/for_Thea/experiments/quantification_test 5_3D9/3D9_5
499	197	8,772	120	PMA	526,527,527,528,528,529,529,530,530,529,529,528,528,526,526,525,525,520,520,519,519,518,518,517,517,516,516,517,517,518,518,519,519,520,520,526,	950,950,951,951,953,953,956,956,961,961,963,963,965,965,966,966,967,967,966,966,965,965,964,964,961,961,955,955,953,953,952,952,950,950,949,949,	/Volumes/Promise RAID 2/Alf/for_Thea/experiments/quantification_test 5_3D9/str_data/PMA/120/3D9_PMA_120image_hoescht187.TIF 3D9_PMA_120image_568186.tif	1750	8,772	0	preAnalysis	none	none	120 PMA	qt_5_3D9_man03	/Volumes/Promise RAID/Alf/for_Thea/experiments/quantification_test 5_3D9/3D9_5
500	238	9,345	120	PMA	1170,1173,1173,1174,1174,1175,1175,1176,1176,1177,1177,1178,1178,1177,1177,1176,1176,1175,1175,1173,1173,1172,1172,1171,1171,1165,1165,1164,1164,1163,1163,1162,1162,1161,1161,1160,1160,1161,1161,1160,1160,1161,1161,1163,1163,1165,1165,1167,1167,1170,	950,950,951,951,952,952,953,953,954,954,956,956,959,959,962,962,963,963,964,964,965,965,966,966,967,967,966,966,965,965,964,964,962,962,960,960,959,959,958,958,954,954,952,952,951,951,950,950,949,949,	/Volumes/Promise RAID 2/Alf/for_Thea/experiments/quantification_test 5_3D9/str_data/PMA/120/3D9_PMA_120image_hoescht187.TIF 3D9_PMA_120image_568186.tif	1750	9,345	0	preAnalysis	none	none	120 PMA	qt_5_3D9_man03	/Volumes/Promise RAID/Alf/for_Thea/experiments/quantification_test 5_3D9/3D9_5
501	158	9,62	120	PMA	284,287,287,289,289,290,290,289,289,288,288,283,283,279,279,276,276,274,274,275,275,277,277,284,	965,965,966,966,968,968,974,974,975,975,976,976,975,975,974,974,973,973,966,966,965,965,964,964,	/Volumes/Promise RAID 2/Alf/for_Thea/experiments/quantification_test 5_3D9/str_data/PMA/120/3D9_PMA_120image_hoescht187.TIF 3D9_PMA_120image_568186.tif	1750	9,62	0	preAnalysis	none	none	120 PMA	qt_5_3D9_man03	/Volumes/Promise RAID/Alf/for_Thea/experiments/quantification_test 5_3D9/3D9_5
502	234	13,06	120	PMA	816,818,818,819,819,820,820,821,821,822,822,821,821,820,820,818,818,814,814,812,812,809,809,807,807,804,804,803,803,802,802,803,803,804,804,806,806,808,808,810,810,816,	976,976,977,977,978,978,979,979,983,983,986,986,989,989,990,990,991,991,990,990,989,989,988,988,987,987,986,986,985,985,980,980,979,979,978,978,977,977,976,976,975,975,	/Volumes/Promise RAID 2/Alf/for_Thea/experiments/quantification_test 5_3D9/str_data/PMA/120/3D9_PMA_120image_hoescht187.TIF 3D9_PMA_120image_568186.tif	1750	13,06	0	preAnalysis	none	none	120 PMA	qt_5_3D9_man03	/Volumes/Promise RAID/Alf/for_Thea/experiments/quantification_test 5_3D9/3D9_5
503	267	10,367	120	PMA	979,982,982,985,985,990,990,991,991,993,993,994,994,993,993,992,992,991,991,987,987,986,986,978,978,975,975,974,974,973,973,972,972,971,971,972,972,971,971,972,972,973,973,974,974,979,	995,995,996,996,997,997,998,998,999,999,1001,1001,1005,1005,1007,1007,1008,1008,1009,1009,1010,1010,1009,1009,1008,1008,1007,1007,1006,1006,1005,1005,1002,1002,1001,1001,1000,1000,998,998,996,996,995,995,994,994,	/Volumes/Promise RAID 2/Alf/for_Thea/experiments/quantification_test 5_3D9/str_data/PMA/120/3D9_PMA_120image_hoescht187.TIF 3D9_PMA_120image_568186.tif	1750	10,367	0	preAnalysis	none	none	120 PMA	qt_5_3D9_man03	/Volumes/Promise RAID/Alf/for_Thea/experiments/quantification_test 5_3D9/3D9_5
504	179	10,547	120	PMA	552,555,555,556,556,557,557,558,558,559,559,558,558,557,557,556,556,552,552,551,551,549,549,548,548,547,547,546,546,545,545,544,544,543,543,544,544,545,545,546,546,552,	1007,1007,1008,1008,1009,1009,1010,1010,1012,1012,1016,1016,1018,1018,1020,1020,1021,1021,1022,1022,1021,1021,1020,1020,1019,1019,1017,1017,1016,1016,1015,1015,1012,1012,1011,1011,1008,1008,1007,1007,1006,1006,	/Volumes/Promise RAID 2/Alf/for_Thea/experiments/quantification_test 5_3D9/str_data/PMA/120/3D9_PMA_120image_hoescht187.TIF 3D9_PMA_120image_568186.tif	1750	10,547	0	preAnalysis	none	none	120 PMA	qt_5_3D9_man03	/Volumes/Promise RAID/Alf/for_Thea/experiments/quantification_test 5_3D9/3D9_5
505	305	11,489	15	PMA	588,592,592,593,593,594,594,595,595,596,596,597,597,598,598,597,597,596,596,593,593,590,590,588,588,587,587,586,586,585,585,583,583,582,582,576,576,575,575,574,574,573,573,574,574,576,576,577,577,581,581,583,583,586,586,588,	19,19,20,20,21,21,24,24,26,26,27,27,29,29,33,33,35,35,36,36,37,37,36,36,35,35,34,34,32,32,30,30,31,31,32,32,31,31,30,30,28,28,24,24,22,22,21,21,20,20,21,21,19,19,18,18,	/Volumes/Promise RAID 2/Alf/for_Thea/experiments/quantification_test 5_3D9/str_data/PMA/15/3D9_PMA_15image_hoescht163.TIF 3D9_PMA_15image_568162.tif	1750	11,489	0	preAnalysis	none	none	15 PMA	qt_5_3D9_man03	/Volumes/Promise RAID/Alf/for_Thea/experiments/quantification_test 5_3D9/3D9_5
506	318	12,579	15	PMA	556,557,557,558,558,560,560,561,561,562,562,563,563,564,564,563,563,562,562,561,561,560,560,559,559,558,558,557,557,556,556,549,549,548,548,547,547,546,546,544,544,542,542,541,541,542,542,543,543,545,545,546,546,548,548,550,550,552,552,551,551,550,550,551,551,553,553,556,	29,29,30,30,31,31,32,32,33,33,35,35,38,38,41,41,44,44,45,45,46,46,47,47,48,48,49,49,50,50,51,51,50,50,49,49,48,48,47,47,46,46,44,44,40,40,39,39,38,38,37,37,38,38,39,39,40,40,37,37,34,34,30,30,29,29,28,28,	/Volumes/Promise RAID 2/Alf/for_Thea/experiments/quantification_test 5_3D9/str_data/PMA/15/3D9_PMA_15image_hoescht163.TIF 3D9_PMA_15image_568162.tif	1750	12,579	0	preAnalysis	none	none	15 PMA	qt_5_3D9_man03	/Volumes/Promise RAID/Alf/for_Thea/experiments/quantification_test 5_3D9/3D9_5
507	144	8,333	15	PMA	350,353,353,354,354,355,355,356,356,355,355,354,354,350,350,344,344,341,341,340,340,339,339,340,340,341,341,343,343,350,	104,104,105,105,106,106,108,108,111,111,113,113,114,114,113,113,112,112,111,111,110,110,106,106,105,105,104,104,103,103,	/Volumes/Promise RAID 2/Alf/for_Thea/experiments/quantification_test 5_3D9/str_data/PMA/15/3D9_PMA_15image_hoescht163.TIF 3D9_PMA_15image_568162.tif	1750	8,333	0	preAnalysis	none	none	15 PMA	qt_5_3D9_man03	/Volumes/Promise RAID/Alf/for_Thea/experiments/quantification_test 5_3D9/3D9_5
508	164	8	15	PMA	335,337,337,338,338,339,339,340,340,341,341,344,344,345,345,347,347,348,348,349,349,350,350,351,351,349,349,348,348,346,346,344,344,343,343,342,342,338,338,334,334,333,333,332,332,331,331,330,330,331,331,333,333,335,	112,112,113,113,115,115,116,116,117,117,118,118,117,117,115,115,117,117,118,118,119,119,120,120,124,124,125,125,126,126,125,125,124,124,123,123,122,122,123,123,122,122,121,121,120,120,119,119,114,114,112,112,111,111,	/Volumes/Promise RAID 2/Alf/for_Thea/experiments/quantification_test 5_3D9/str_data/PMA/15/3D9_PMA_15image_hoescht163.TIF 3D9_PMA_15image_568162.tif	1750	8	0	preAnalysis	none	none	15 PMA	qt_5_3D9_man03	/Volumes/Promise RAID/Alf/for_Thea/experiments/quantification_test 5_3D9/3D9_5
509	481	13,96	15	PMA	54,56,56,60,60,63,63,64,64,65,65,66,66,63,63,64,64,63,63,61,61,63,63,64,64,63,63,62,62,61,61,60,60,59,59,54,54,53,53,52,52,50,50,45,45,43,43,42,42,41,41,40,40,41,41,42,42,43,43,45,45,46,46,47,47,48,48,47,47,48,48,47,47,48,48,49,49,50,50,52,52,54,	130,130,131,131,133,133,132,132,133,133,134,134,136,136,140,140,142,142,144,144,146,146,145,145,147,147,149,149,151,151,153,153,154,154,155,155,157,157,158,158,159,159,160,160,159,159,158,158,155,155,154,154,150,150,148,148,147,147,146,146,145,145,144,144,140,140,139,139,138,138,137,137,135,135,133,133,131,131,130,130,129,129,	/Volumes/Promise RAID 2/Alf/for_Thea/experiments/quantification_test 5_3D9/str_data/PMA/15/3D9_PMA_15image_hoescht163.TIF 3D9_PMA_15image_568162.tif	1750	13,96	0	preAnalysis	none	none	15 PMA	qt_5_3D9_man03	/Volumes/Promise RAID/Alf/for_Thea/experiments/quantification_test 5_3D9/3D9_5
510	323	13,969	15	PMA	869,872,872,874,874,875,875,876,876,875,875,874,874,872,872,870,870,868,868,866,866,861,861,859,859,858,858,857,857,858,858,860,860,861,861,862,862,861,861,862,862,864,864,866,866,868,868,869,	140,140,141,141,143,143,145,145,157,157,159,159,160,160,161,161,160,160,161,161,162,162,161,161,160,160,159,159,153,153,152,152,151,151,150,150,149,149,144,144,142,142,141,141,140,140,139,139,	/Volumes/Promise RAID 2/Alf/for_Thea/experiments/quantification_test 5_3D9/str_data/PMA/15/3D9_PMA_15image_hoescht163.TIF 3D9_PMA_15image_568162.tif	1750	13,969	0	preAnalysis	none	none	15 PMA	qt_5_3D9_man03	/Volumes/Promise RAID/Alf/for_Thea/experiments/quantification_test 5_3D9/3D9_5
511	354	12,384	15	PMA	1081,1082,1082,1083,1083,1084,1084,1083,1083,1086,1086,1088,1088,1089,1089,1090,1090,1091,1091,1092,1092,1091,1091,1090,1090,1089,1089,1087,1087,1086,1086,1082,1082,1080,1080,1079,1079,1078,1078,1079,1079,1080,1080,1081,1081,1082,1082,1081,1081,1082,1082,1080,1080,1079,1079,1073,1073,1071,1071,1070,1070,1069,1069,1070,1070,1071,1071,1073,1073,1075,1075,1081,	153,153,154,154,155,155,161,161,162,162,163,163,164,164,165,165,166,166,167,167,172,172,175,175,178,178,179,179,180,180,181,181,180,180,179,179,176,176,173,173,169,169,170,170,167,167,166,166,165,165,164,164,165,165,166,166,165,165,164,164,162,162,158,158,156,156,154,154,153,153,152,152,	/Volumes/Promise RAID 2/Alf/for_Thea/experiments/quantification_test 5_3D9/str_data/PMA/15/3D9_PMA_15image_hoescht163.TIF 3D9_PMA_15image_568162.tif	1750	12,384	0	preAnalysis	none	none	15 PMA	qt_5_3D9_man03	/Volumes/Promise RAID/Alf/for_Thea/experiments/quantification_test 5_3D9/3D9_5
512	251	5,865	15	PMA	89,91,91,92,92,93,93,94,94,95,95,97,97,99,99,100,100,101,101,102,102,101,101,100,100,98,98,91,91,90,90,89,89,83,83,81,81,80,80,81,81,82,82,83,83,84,84,86,86,89,	165,165,166,166,167,167,169,169,170,170,169,169,170,170,171,171,172,172,173,173,178,178,179,179,180,180,181,181,180,180,179,179,178,178,177,177,175,175,170,170,168,168,167,167,166,166,165,165,164,164,	/Volumes/Promise RAID 2/Alf/for_Thea/experiments/quantification_test 5_3D9/str_data/PMA/15/3D9_PMA_15image_hoescht163.TIF 3D9_PMA_15image_568162.tif	1750	5,865	0	preAnalysis	none	none	15 PMA	qt_5_3D9_man03	/Volumes/Promise RAID/Alf/for_Thea/experiments/quantification_test 5_3D9/3D9_5
513	247	4,794	15	PMA	132,136,136,138,138,139,139,140,140,141,141,140,140,139,139,137,137,134,134,132,132,131,131,128,128,127,127,126,126,125,125,124,124,123,123,121,121,120,120,119,119,120,120,122,122,132,	172,172,173,173,174,174,176,176,179,179,183,183,185,185,186,186,187,187,186,186,187,187,186,186,185,185,184,184,182,182,181,181,179,179,178,178,177,177,176,176,174,174,172,172,171,171,	/Volumes/Promise RAID 2/Alf/for_Thea/experiments/quantification_test 5_3D9/str_data/PMA/15/3D9_PMA_15image_hoescht163.TIF 3D9_PMA_15image_568162.tif	1750	4,794	0	preAnalysis	none	none	15 PMA	qt_5_3D9_man03	/Volumes/Promise RAID/Alf/for_Thea/experiments/quantification_test 5_3D9/3D9_5
514	193	15,632	15	PMA	815,816,816,817,817,819,819,821,821,822,822,823,823,824,824,823,823,822,822,821,821,819,819,815,815,813,813,811,811,810,810,809,809,808,808,809,809,810,810,814,814,815,	175,175,174,174,175,175,176,176,177,177,178,178,182,182,185,185,187,187,188,188,189,189,190,190,189,189,188,188,187,187,186,186,185,185,178,178,177,177,175,175,174,174,	/Volumes/Promise RAID 2/Alf/for_Thea/experiments/quantification_test 5_3D9/str_data/PMA/15/3D9_PMA_15image_hoescht163.TIF 3D9_PMA_15image_568162.tif	1750	15,632	0	preAnalysis	none	none	15 PMA	qt_5_3D9_man03	/Volumes/Promise RAID/Alf/for_Thea/experiments/quantification_test 5_3D9/3D9_5
515	297	12,724	15	PMA	692,693,693,694,694,695,695,696,696,697,697,698,698,697,697,695,695,691,691,690,690,689,689,683,683,682,682,681,681,680,680,679,679,676,676,673,673,671,671,670,670,669,669,670,670,673,673,675,675,678,678,681,681,682,682,683,683,684,684,685,685,692,	191,191,193,193,194,194,195,195,197,197,199,199,204,204,206,206,207,207,205,205,203,203,200,200,199,199,201,201,202,202,203,203,204,204,205,205,204,204,203,203,201,201,195,195,194,194,193,193,194,194,195,195,194,194,193,193,192,192,191,191,190,190,	/Volumes/Promise RAID 2/Alf/for_Thea/experiments/quantification_test 5_3D9/str_data/PMA/15/3D9_PMA_15image_hoescht163.TIF 3D9_PMA_15image_568162.tif	1750	12,724	0	preAnalysis	none	none	15 PMA	qt_5_3D9_man03	/Volumes/Promise RAID/Alf/for_Thea/experiments/quantification_test 5_3D9/3D9_5
516	366	13,88	15	PMA	952,954,954,955,955,956,956,957,957,959,959,960,960,961,961,962,962,961,961,960,960,959,959,958,958,957,957,954,954,953,953,951,951,950,950,949,949,950,950,949,949,948,948,945,945,939,939,938,938,937,937,936,936,935,935,936,936,937,937,938,938,940,940,944,944,945,945,947,947,952,	196,196,197,197,198,198,199,199,200,200,202,202,204,204,207,207,208,208,214,214,215,215,217,217,218,218,219,219,220,220,219,219,218,218,217,217,210,210,209,209,207,207,206,206,207,207,206,206,205,205,204,204,202,202,201,201,199,199,198,198,197,197,196,196,197,197,196,196,195,195,	/Volumes/Promise RAID 2/Alf/for_Thea/experiments/quantification_test 5_3D9/str_data/PMA/15/3D9_PMA_15image_hoescht163.TIF 3D9_PMA_15image_568162.tif	1750	13,88	0	preAnalysis	none	none	15 PMA	qt_5_3D9_man03	/Volumes/Promise RAID/Alf/for_Thea/experiments/quantification_test 5_3D9/3D9_5
517	275	7,331	15	PMA	286,288,288,289,289,290,290,291,291,292,292,291,291,290,290,289,289,288,288,287,287,286,286,284,284,280,280,273,273,271,271,270,270,269,269,268,268,269,269,270,270,272,272,276,276,278,278,283,283,284,284,283,283,282,282,283,283,284,284,286,	233,233,234,234,235,235,238,238,241,241,246,246,247,247,248,248,249,249,250,250,251,251,252,252,253,253,252,252,251,251,250,250,249,249,247,247,245,245,243,243,242,242,241,241,242,242,243,243,242,242,240,240,238,238,234,234,233,233,232,232,	/Volumes/Promise RAID 2/Alf/for_Thea/experiments/quantification_test 5_3D9/str_data/PMA/15/3D9_PMA_15image_hoescht163.TIF 3D9_PMA_15image_568162.tif	1750	7,331	0	preAnalysis	none	none	15 PMA	qt_5_3D9_man03	/Volumes/Promise RAID/Alf/for_Thea/experiments/quantification_test 5_3D9/3D9_5
518	357	13,132	15	PMA	1274,1276,1276,1277,1277,1282,1282,1284,1284,1285,1285,1284,1284,1283,1283,1282,1282,1281,1281,1276,1276,1275,1275,1274,1274,1275,1275,1274,1274,1273,1273,1272,1272,1271,1271,1269,1269,1265,1265,1263,1263,1262,1262,1261,1261,1262,1262,1263,1263,1265,1265,1266,1266,1267,1267,1268,1268,1269,1269,1272,1272,1274,	240,240,241,241,242,242,243,243,245,245,255,255,257,257,258,258,259,259,260,260,259,259,258,258,257,257,256,256,254,254,255,255,257,257,258,258,259,259,258,258,257,257,255,255,251,251,250,250,249,249,248,248,244,244,242,242,241,241,240,240,239,239,	/Volumes/Promise RAID 2/Alf/for_Thea/experiments/quantification_test 5_3D9/str_data/PMA/15/3D9_PMA_15image_hoescht163.TIF 3D9_PMA_15image_568162.tif	1750	13,132	0	preAnalysis	none	none	15 PMA	qt_5_3D9_man03	/Volumes/Promise RAID/Alf/for_Thea/experiments/quantification_test 5_3D9/3D9_5
519	357	12,818	15	PMA	842,844,844,846,846,850,850,851,851,852,852,853,853,854,854,853,853,852,852,851,851,850,850,849,849,847,847,845,845,842,842,840,840,839,839,838,838,839,839,838,838,837,837,836,836,835,835,834,834,833,833,834,834,835,835,836,836,837,837,840,840,842,	253,253,252,252,253,253,254,254,255,255,256,256,258,258,263,263,265,265,266,266,274,274,275,275,276,276,277,277,276,276,275,275,274,274,273,273,267,267,266,266,265,265,264,264,263,263,262,262,260,260,257,257,256,256,255,255,254,254,253,253,252,252,	/Volumes/Promise RAID 2/Alf/for_Thea/experiments/quantification_test 5_3D9/str_data/PMA/15/3D9_PMA_15image_hoescht163.TIF 3D9_PMA_15image_568162.tif	1750	12,818	0	preAnalysis	none	none	15 PMA	qt_5_3D9_man03	/Volumes/Promise RAID/Alf/for_Thea/experiments/quantification_test 5_3D9/3D9_5
520	309	14,809	15	PMA	713,714,714,720,720,721,721,722,722,723,723,724,724,723,723,722,722,721,721,720,720,719,719,720,720,719,719,718,718,713,713,712,712,711,711,710,710,709,709,708,708,707,707,706,706,705,705,704,704,705,705,707,707,708,708,711,711,713,	296,296,295,295,296,296,297,297,298,298,300,300,301,301,304,304,306,306,307,307,310,310,311,311,316,316,317,317,318,318,317,317,316,316,314,314,313,313,311,311,310,310,306,306,305,305,304,304,299,299,298,298,297,297,296,296,295,295,	/Volumes/Promise RAID 2/Alf/for_Thea/experiments/quantification_test 5_3D9/str_data/PMA/15/3D9_PMA_15image_hoescht163.TIF 3D9_PMA_15image_568162.tif	1750	14,809	0	preAnalysis	none	none	15 PMA	qt_5_3D9_man03	/Volumes/Promise RAID/Alf/for_Thea/experiments/quantification_test 5_3D9/3D9_5
521	325	12,406	15	PMA	545,547,547,548,548,549,549,550,550,553,553,554,554,556,556,557,557,558,558,559,559,558,558,557,557,555,555,550,550,549,549,547,547,545,545,541,541,539,539,538,538,537,537,536,536,537,537,538,538,539,539,540,540,545,	309,309,310,310,311,311,313,313,318,318,317,317,318,318,319,319,320,320,322,322,323,323,326,326,327,327,328,328,327,327,328,328,329,329,330,330,329,329,328,328,327,327,325,325,320,320,318,318,310,310,309,309,308,308,	/Volumes/Promise RAID 2/Alf/for_Thea/experiments/quantification_test 5_3D9/str_data/PMA/15/3D9_PMA_15image_hoescht163.TIF 3D9_PMA_15image_568162.tif	1750	12,406	0	preAnalysis	none	none	15 PMA	qt_5_3D9_man03	/Volumes/Promise RAID/Alf/for_Thea/experiments/quantification_test 5_3D9/3D9_5
522	136	12,353	15	PMA	1207,1209,1209,1210,1210,1211,1211,1212,1212,1213,1213,1212,1212,1211,1211,1210,1210,1209,1209,1206,1206,1203,1203,1202,1202,1201,1201,1202,1202,1207,	320,320,321,321,322,322,323,323,324,324,328,328,331,331,332,332,333,333,334,334,333,333,329,329,327,327,320,320,319,319,	/Volumes/Promise RAID 2/Alf/for_Thea/experiments/quantification_test 5_3D9/str_data/PMA/15/3D9_PMA_15image_hoescht163.TIF 3D9_PMA_15image_568162.tif	1750	12,353	0	preAnalysis	none	none	15 PMA	qt_5_3D9_man03	/Volumes/Promise RAID/Alf/for_Thea/experiments/quantification_test 5_3D9/3D9_5
523	231	12,883	15	PMA	1189,1190,1190,1191,1191,1198,1198,1199,1199,1200,1200,1201,1201,1199,1199,1197,1197,1196,1196,1195,1195,1194,1194,1187,1187,1185,1185,1184,1184,1182,1182,1181,1181,1180,1180,1181,1181,1182,1182,1183,1183,1184,1184,1189,	322,322,326,326,328,328,329,329,330,330,331,331,332,332,333,333,334,334,337,337,338,338,339,339,338,338,337,337,336,336,335,335,333,333,326,326,324,324,323,323,322,322,321,321,	/Volumes/Promise RAID 2/Alf/for_Thea/experiments/quantification_test 5_3D9/str_data/PMA/15/3D9_PMA_15image_hoescht163.TIF 3D9_PMA_15image_568162.tif	1750	12,883	0	preAnalysis	none	none	15 PMA	qt_5_3D9_man03	/Volumes/Promise RAID/Alf/for_Thea/experiments/quantification_test 5_3D9/3D9_5
524	337	12,576	15	PMA	493,495,495,496,496,495,495,497,497,501,501,502,502,503,503,504,504,505,505,504,504,502,502,500,500,495,495,494,494,493,493,492,492,485,485,484,484,483,483,482,482,481,481,482,482,483,483,485,485,487,487,488,488,490,490,493,	327,327,329,329,335,335,337,337,336,336,337,337,338,338,340,340,342,342,348,348,349,349,350,350,351,351,350,350,349,349,348,348,343,343,342,342,341,341,339,339,337,337,333,333,332,332,331,331,330,330,329,329,327,327,326,326,	/Volumes/Promise RAID 2/Alf/for_Thea/experiments/quantification_test 5_3D9/str_data/PMA/15/3D9_PMA_15image_hoescht163.TIF 3D9_PMA_15image_568162.tif	1750	12,576	0	preAnalysis	none	none	15 PMA	qt_5_3D9_man03	/Volumes/Promise RAID/Alf/for_Thea/experiments/quantification_test 5_3D9/3D9_5
525	289	12,623	15	PMA	862,865,865,869,869,870,870,872,872,873,873,875,875,876,876,875,875,874,874,873,873,867,867,866,866,865,865,864,864,863,863,862,862,860,860,859,859,857,857,856,856,855,855,854,854,855,855,856,856,858,858,862,	346,346,347,347,348,348,349,349,350,350,351,351,352,352,362,362,363,363,364,364,365,365,364,364,363,363,361,361,360,360,359,359,358,358,357,357,356,356,355,355,354,354,352,352,348,348,347,347,346,346,345,345,	/Volumes/Promise RAID 2/Alf/for_Thea/experiments/quantification_test 5_3D9/str_data/PMA/15/3D9_PMA_15image_hoescht163.TIF 3D9_PMA_15image_568162.tif	1750	12,623	0	preAnalysis	none	none	15 PMA	qt_5_3D9_man03	/Volumes/Promise RAID/Alf/for_Thea/experiments/quantification_test 5_3D9/3D9_5
526	288	7,722	15	PMA	375,376,376,377,377,378,378,381,381,382,382,383,383,384,384,386,386,389,389,391,391,392,392,391,391,390,390,389,389,388,388,387,387,385,385,379,379,377,377,376,376,374,374,373,373,371,371,370,370,369,369,368,368,369,369,370,370,375,	371,371,372,372,377,377,378,378,377,377,375,375,373,373,372,372,371,371,372,372,373,373,378,378,380,380,382,382,385,385,386,386,387,387,388,388,387,387,386,386,385,385,384,384,383,383,382,382,380,380,379,379,372,372,371,371,370,370,	/Volumes/Promise RAID 2/Alf/for_Thea/experiments/quantification_test 5_3D9/str_data/PMA/15/3D9_PMA_15image_hoescht163.TIF 3D9_PMA_15image_568162.tif	1750	7,722	0	preAnalysis	none	none	15 PMA	qt_5_3D9_man03	/Volumes/Promise RAID/Alf/for_Thea/experiments/quantification_test 5_3D9/3D9_5
527	300	9,25	15	PMA	315,316,316,317,317,319,319,320,320,321,321,322,322,324,324,327,327,329,329,330,330,329,329,328,328,327,327,326,326,324,324,323,323,322,322,311,311,310,310,309,309,310,310,309,309,308,308,309,309,310,310,311,311,315,	373,373,375,375,381,381,380,380,379,379,378,378,377,377,376,376,377,377,378,378,384,384,386,386,387,387,388,388,389,389,390,390,391,391,392,392,391,391,390,390,386,386,381,381,379,379,375,375,374,374,373,373,372,372,	/Volumes/Promise RAID 2/Alf/for_Thea/experiments/quantification_test 5_3D9/str_data/PMA/15/3D9_PMA_15image_hoescht163.TIF 3D9_PMA_15image_568162.tif	1750	9,25	0	preAnalysis	none	none	15 PMA	qt_5_3D9_man03	/Volumes/Promise RAID/Alf/for_Thea/experiments/quantification_test 5_3D9/3D9_5
528	304	13,053	15	PMA	1183,1186,1186,1187,1187,1193,1193,1194,1194,1195,1195,1196,1196,1197,1197,1196,1196,1195,1195,1194,1194,1192,1192,1187,1187,1185,1185,1184,1184,1183,1183,1181,1181,1179,1179,1178,1178,1177,1177,1178,1178,1179,1179,1182,1182,1183,	379,379,380,380,381,381,382,382,383,383,384,384,391,391,396,396,397,397,399,399,400,400,401,401,400,400,399,399,398,398,390,390,389,389,387,387,385,385,382,382,380,380,379,379,378,378,	/Volumes/Promise RAID 2/Alf/for_Thea/experiments/quantification_test 5_3D9/str_data/PMA/15/3D9_PMA_15image_hoescht163.TIF 3D9_PMA_15image_568162.tif	1750	13,053	0	preAnalysis	none	none	15 PMA	qt_5_3D9_man03	/Volumes/Promise RAID/Alf/for_Thea/experiments/quantification_test 5_3D9/3D9_5
529	286	12,699	15	PMA	551,552,552,553,553,554,554,555,555,554,554,553,553,552,552,551,551,550,550,549,549,547,547,544,544,539,539,537,537,536,536,535,535,536,536,537,537,538,538,540,540,541,541,542,542,543,543,544,544,545,545,546,546,551,	380,380,382,382,383,383,386,386,390,390,393,393,396,396,397,397,398,398,399,399,400,400,401,401,402,402,401,401,400,400,399,399,396,396,394,394,393,393,392,392,391,391,390,390,384,384,382,382,381,381,380,380,379,379,	/Volumes/Promise RAID 2/Alf/for_Thea/experiments/quantification_test 5_3D9/str_data/PMA/15/3D9_PMA_15image_hoescht163.TIF 3D9_PMA_15image_568162.tif	1750	12,699	0	preAnalysis	none	none	15 PMA	qt_5_3D9_man03	/Volumes/Promise RAID/Alf/for_Thea/experiments/quantification_test 5_3D9/3D9_5
530	273	6,212	15	PMA	121,122,122,123,123,122,122,121,121,119,119,118,118,117,117,118,118,119,119,128,128,129,129,128,128,126,126,124,124,122,122,118,118,117,117,116,116,115,115,114,114,113,113,112,112,111,111,110,110,109,109,110,110,111,111,112,112,113,113,114,114,115,115,117,117,121,	391,391,393,393,394,394,396,396,397,397,400,400,402,402,405,405,406,406,407,407,408,408,414,414,415,415,416,416,417,417,416,416,415,415,414,414,413,413,412,412,410,410,409,409,408,408,406,406,405,405,399,399,397,397,396,396,394,394,393,393,392,392,391,391,390,390,	/Volumes/Promise RAID 2/Alf/for_Thea/experiments/quantification_test 5_3D9/str_data/PMA/15/3D9_PMA_15image_hoescht163.TIF 3D9_PMA_15image_568162.tif	1750	6,212	0	preAnalysis	none	none	15 PMA	qt_5_3D9_man03	/Volumes/Promise RAID/Alf/for_Thea/experiments/quantification_test 5_3D9/3D9_5
531	250	7,104	15	PMA	181,183,183,186,186,187,187,188,188,187,187,186,186,185,185,184,184,182,182,176,176,174,174,173,173,172,172,171,171,172,172,173,173,174,174,176,176,177,177,181,	412,412,414,414,415,415,416,416,422,422,424,424,427,427,428,428,429,429,430,430,429,429,428,428,427,427,424,424,417,417,416,416,414,414,413,413,412,412,411,411,	/Volumes/Promise RAID 2/Alf/for_Thea/experiments/quantification_test 5_3D9/str_data/PMA/15/3D9_PMA_15image_hoescht163.TIF 3D9_PMA_15image_568162.tif	1750	7,104	0	preAnalysis	none	none	15 PMA	qt_5_3D9_man03	/Volumes/Promise RAID/Alf/for_Thea/experiments/quantification_test 5_3D9/3D9_5
532	302	8,583	15	PMA	479,481,481,482,482,483,483,487,487,489,489,490,490,491,491,490,490,489,489,488,488,487,487,486,486,484,484,480,480,479,479,478,478,476,476,475,475,473,473,472,472,471,471,470,470,471,471,472,472,473,473,479,	412,412,413,413,415,415,417,417,416,416,417,417,418,418,421,421,422,422,423,423,428,428,430,430,431,431,432,432,431,431,430,430,429,429,430,430,429,429,428,428,427,427,419,419,415,415,413,413,412,412,411,411,	/Volumes/Promise RAID 2/Alf/for_Thea/experiments/quantification_test 5_3D9/str_data/PMA/15/3D9_PMA_15image_hoescht163.TIF 3D9_PMA_15image_568162.tif	1750	8,583	0	preAnalysis	none	none	15 PMA	qt_5_3D9_man03	/Volumes/Promise RAID/Alf/for_Thea/experiments/quantification_test 5_3D9/3D9_5
533	328	11,659	15	PMA	1299,1300,1300,1301,1301,1300,1300,1301,1301,1302,1302,1303,1303,1304,1304,1305,1305,1306,1306,1307,1307,1306,1306,1304,1304,1302,1302,1300,1300,1295,1295,1294,1294,1293,1293,1292,1292,1291,1291,1290,1290,1291,1291,1292,1292,1290,1290,1289,1289,1288,1288,1289,1289,1290,1290,1291,1291,1292,1292,1299,	419,419,420,420,425,425,430,430,432,432,433,433,434,434,435,435,437,437,439,439,441,441,444,444,445,445,446,446,445,445,444,444,442,442,441,441,440,440,438,438,435,435,433,433,431,431,430,430,429,429,425,425,422,422,420,420,419,419,418,418,	/Volumes/Promise RAID 2/Alf/for_Thea/experiments/quantification_test 5_3D9/str_data/PMA/15/3D9_PMA_15image_hoescht163.TIF 3D9_PMA_15image_568162.tif	1750	11,659	0	preAnalysis	none	none	15 PMA	qt_5_3D9_man03	/Volumes/Promise RAID/Alf/for_Thea/experiments/quantification_test 5_3D9/3D9_5
534	247	7,255	15	PMA	134,136,136,137,137,136,136,134,134,132,132,133,133,134,134,133,133,132,132,124,124,122,122,120,120,121,121,122,122,123,123,127,127,130,130,133,133,134,	439,439,441,441,446,446,448,448,449,449,451,451,453,453,456,456,457,457,458,458,457,457,456,456,446,446,445,445,443,443,441,441,440,440,439,439,438,438,	/Volumes/Promise RAID 2/Alf/for_Thea/experiments/quantification_test 5_3D9/str_data/PMA/15/3D9_PMA_15image_hoescht163.TIF 3D9_PMA_15image_568162.tif	1750	7,255	0	preAnalysis	none	none	15 PMA	qt_5_3D9_man03	/Volumes/Promise RAID/Alf/for_Thea/experiments/quantification_test 5_3D9/3D9_5
535	204	13,716	15	PMA	633,635,635,636,636,637,637,638,638,637,637,636,636,635,635,634,634,633,633,627,627,625,625,624,624,623,623,622,622,623,623,624,624,625,625,626,626,627,627,629,629,633,	497,497,498,498,499,499,501,501,503,503,507,507,510,510,511,511,512,512,513,513,512,512,511,511,510,510,509,509,503,503,501,501,500,500,499,499,498,498,497,497,496,496,	/Volumes/Promise RAID 2/Alf/for_Thea/experiments/quantification_test 5_3D9/str_data/PMA/15/3D9_PMA_15image_hoescht163.TIF 3D9_PMA_15image_568162.tif	1750	13,716	0	preAnalysis	none	none	15 PMA	qt_5_3D9_man03	/Volumes/Promise RAID/Alf/for_Thea/experiments/quantification_test 5_3D9/3D9_5
536	271	9,092	15	PMA	412,414,414,415,415,416,416,415,415,414,414,413,413,411,411,410,410,409,409,407,407,400,400,397,397,396,396,395,395,394,394,393,393,394,394,396,396,400,400,403,403,404,404,407,407,412,	510,510,511,511,512,512,517,517,518,518,519,519,520,520,522,522,523,523,524,524,525,525,524,524,523,523,522,522,521,521,518,518,514,514,512,512,511,511,512,512,511,511,510,510,509,509,	/Volumes/Promise RAID 2/Alf/for_Thea/experiments/quantification_test 5_3D9/str_data/PMA/15/3D9_PMA_15image_hoescht163.TIF 3D9_PMA_15image_568162.tif	1750	9,092	0	preAnalysis	none	none	15 PMA	qt_5_3D9_man03	/Volumes/Promise RAID/Alf/for_Thea/experiments/quantification_test 5_3D9/3D9_5
537	299	14,953	15	PMA	822,824,824,825,825,827,827,829,829,830,830,831,831,830,830,829,829,828,828,826,826,820,820,819,819,814,814,813,813,812,812,811,811,810,810,811,811,812,812,813,813,814,814,815,815,816,816,817,817,822,	513,513,514,514,515,515,516,516,517,517,518,518,525,525,527,527,529,529,530,530,531,531,530,530,529,529,528,528,527,527,526,526,525,525,519,519,518,518,517,517,516,516,515,515,514,514,513,513,512,512,	/Volumes/Promise RAID 2/Alf/for_Thea/experiments/quantification_test 5_3D9/str_data/PMA/15/3D9_PMA_15image_hoescht163.TIF 3D9_PMA_15image_568162.tif	1750	14,953	0	preAnalysis	none	none	15 PMA	qt_5_3D9_man03	/Volumes/Promise RAID/Alf/for_Thea/experiments/quantification_test 5_3D9/3D9_5
538	332	13,37	15	PMA	699,701,701,702,702,701,701,702,702,703,703,705,705,706,706,708,708,709,709,711,711,716,716,717,717,718,718,719,719,718,718,717,717,716,716,715,715,714,714,712,712,708,708,701,701,700,700,699,699,698,698,697,697,695,695,693,693,692,692,691,691,690,690,691,691,692,692,693,693,695,695,699,	570,570,572,572,578,578,581,581,582,582,581,581,580,580,579,579,578,578,577,577,576,576,577,577,578,578,580,580,582,582,584,584,585,585,586,586,587,587,588,588,589,589,590,590,589,589,588,588,587,587,586,586,584,584,583,583,582,582,581,581,578,578,576,576,572,572,571,571,570,570,569,569,	/Volumes/Promise RAID 2/Alf/for_Thea/experiments/quantification_test 5_3D9/str_data/PMA/15/3D9_PMA_15image_hoescht163.TIF 3D9_PMA_15image_568162.tif	1750	13,37	0	preAnalysis	none	none	15 PMA	qt_5_3D9_man03	/Volumes/Promise RAID/Alf/for_Thea/experiments/quantification_test 5_3D9/3D9_5
539	276	8,58	15	PMA	317,319,319,320,320,321,321,322,322,327,327,328,328,329,329,331,331,332,332,333,333,332,332,331,331,329,329,325,325,323,323,322,322,314,314,313,313,312,312,311,311,310,310,311,311,312,312,314,314,317,	573,573,574,574,575,575,574,574,573,573,574,574,576,576,578,578,579,579,580,580,585,585,587,587,588,588,589,589,588,588,587,587,586,586,585,585,584,584,583,583,580,580,576,576,574,574,573,573,572,572,	/Volumes/Promise RAID 2/Alf/for_Thea/experiments/quantification_test 5_3D9/str_data/PMA/15/3D9_PMA_15image_hoescht163.TIF 3D9_PMA_15image_568162.tif	1750	8,58	0	preAnalysis	none	none	15 PMA	qt_5_3D9_man03	/Volumes/Promise RAID/Alf/for_Thea/experiments/quantification_test 5_3D9/3D9_5
540	257	12,389	15	PMA	960,962,962,963,963,965,965,966,966,967,967,968,968,967,967,966,966,965,965,963,963,957,957,956,956,955,955,954,954,955,955,954,954,953,953,952,952,953,953,954,954,960,	599,599,600,600,601,601,603,603,605,605,606,606,614,614,615,615,617,617,618,618,619,619,618,618,617,617,616,616,612,612,609,609,608,608,606,606,600,600,599,599,598,598,	/Volumes/Promise RAID 2/Alf/for_Thea/experiments/quantification_test 5_3D9/str_data/PMA/15/3D9_PMA_15image_hoescht163.TIF 3D9_PMA_15image_568162.tif	1750	12,389	0	preAnalysis	none	none	15 PMA	qt_5_3D9_man03	/Volumes/Promise RAID/Alf/for_Thea/experiments/quantification_test 5_3D9/3D9_5
541	266	6,376	15	PMA	242,243,243,244,244,245,245,244,244,243,243,242,242,245,245,247,247,249,249,250,250,251,251,252,252,253,253,252,252,251,251,250,250,249,249,248,248,244,244,243,243,242,242,241,241,239,239,237,237,236,236,235,235,234,234,233,233,232,232,233,233,234,234,235,235,236,236,238,238,242,	624,624,625,625,626,626,630,630,631,631,632,632,635,635,634,634,632,632,631,631,632,632,633,633,634,634,639,639,641,641,642,642,643,643,644,644,645,645,644,644,643,643,642,642,641,641,640,640,639,639,638,638,637,637,635,635,634,634,630,630,627,627,626,626,625,625,624,624,623,623,	/Volumes/Promise RAID 2/Alf/for_Thea/experiments/quantification_test 5_3D9/str_data/PMA/15/3D9_PMA_15image_hoescht163.TIF 3D9_PMA_15image_568162.tif	1750	6,376	0	preAnalysis	none	none	15 PMA	qt_5_3D9_man03	/Volumes/Promise RAID/Alf/for_Thea/experiments/quantification_test 5_3D9/3D9_5
542	293	13,669	15	PMA	802,803,803,804,804,805,805,806,806,808,808,810,810,815,815,816,816,817,817,818,818,817,817,816,816,815,815,802,802,798,798,797,797,796,796,795,795,796,796,797,797,802,	650,650,651,651,652,652,659,659,660,660,661,661,660,660,661,661,662,662,664,664,665,665,668,668,669,669,670,670,669,669,668,668,667,667,657,657,651,651,650,650,649,649,	/Volumes/Promise RAID 2/Alf/for_Thea/experiments/quantification_test 5_3D9/str_data/PMA/15/3D9_PMA_15image_hoescht163.TIF 3D9_PMA_15image_568162.tif	1750	13,669	0	preAnalysis	none	none	15 PMA	qt_5_3D9_man03	/Volumes/Promise RAID/Alf/for_Thea/experiments/quantification_test 5_3D9/3D9_5
543	341	10,604	15	PMA	465,466,466,467,467,468,468,469,469,471,471,473,473,474,474,477,477,478,478,479,479,478,478,477,477,478,478,477,477,475,475,473,473,467,467,464,464,463,463,462,462,461,461,460,460,459,459,458,458,457,457,458,458,459,459,460,460,461,461,465,	667,667,668,668,669,669,670,670,668,668,667,667,666,666,667,667,668,668,670,670,674,674,676,676,678,678,683,683,685,685,686,686,687,687,686,686,685,685,684,684,679,679,678,678,677,677,676,676,673,673,671,671,669,669,668,668,667,667,666,666,	/Volumes/Promise RAID 2/Alf/for_Thea/experiments/quantification_test 5_3D9/str_data/PMA/15/3D9_PMA_15image_hoescht163.TIF 3D9_PMA_15image_568162.tif	1750	10,604	0	preAnalysis	none	none	15 PMA	qt_5_3D9_man03	/Volumes/Promise RAID/Alf/for_Thea/experiments/quantification_test 5_3D9/3D9_5
544	355	14,203	15	PMA	894,896,896,897,897,898,898,899,899,900,900,899,899,898,898,896,896,895,895,894,894,893,893,885,885,884,884,882,882,881,881,880,880,881,881,882,882,885,885,884,884,885,885,886,886,887,887,889,889,894,	694,694,695,695,697,697,703,703,705,705,711,711,712,712,713,713,714,714,716,716,717,717,718,718,717,717,716,716,714,714,713,713,709,709,707,707,706,706,702,702,697,697,696,696,695,695,694,694,693,693,	/Volumes/Promise RAID 2/Alf/for_Thea/experiments/quantification_test 5_3D9/str_data/PMA/15/3D9_PMA_15image_hoescht163.TIF 3D9_PMA_15image_568162.tif	1750	14,203	0	preAnalysis	none	none	15 PMA	qt_5_3D9_man03	/Volumes/Promise RAID/Alf/for_Thea/experiments/quantification_test 5_3D9/3D9_5
545	147	10,34	15	PMA	477,479,479,480,480,481,481,479,479,477,477,474,474,472,472,471,471,470,470,467,467,466,466,467,467,468,468,470,470,477,	699,699,700,700,701,701,707,707,708,708,709,709,710,710,709,709,710,710,709,709,708,708,701,701,700,700,699,699,698,698,	/Volumes/Promise RAID 2/Alf/for_Thea/experiments/quantification_test 5_3D9/str_data/PMA/15/3D9_PMA_15image_hoescht163.TIF 3D9_PMA_15image_568162.tif	1750	10,34	0	preAnalysis	none	none	15 PMA	qt_5_3D9_man03	/Volumes/Promise RAID/Alf/for_Thea/experiments/quantification_test 5_3D9/3D9_5
546	327	13,847	15	PMA	746,749,749,750,750,751,751,752,752,753,753,752,752,751,751,750,750,748,748,744,744,743,743,740,740,736,736,734,734,732,732,731,731,732,732,733,733,735,735,736,736,735,735,736,736,737,737,738,738,739,739,740,740,743,743,746,	705,705,706,706,707,707,708,708,710,710,716,716,720,720,721,721,723,723,724,724,723,723,724,724,725,725,724,724,723,723,721,721,718,718,716,716,715,715,714,714,713,713,711,711,710,710,709,709,708,708,706,706,705,705,704,704,	/Volumes/Promise RAID 2/Alf/for_Thea/experiments/quantification_test 5_3D9/str_data/PMA/15/3D9_PMA_15image_hoescht163.TIF 3D9_PMA_15image_568162.tif	1750	13,847	0	preAnalysis	none	none	15 PMA	qt_5_3D9_man03	/Volumes/Promise RAID/Alf/for_Thea/experiments/quantification_test 5_3D9/3D9_5
547	197	11,487	15	PMA	488,490,490,491,491,492,492,491,491,490,490,486,486,485,485,484,484,483,483,481,481,477,477,475,475,473,473,472,472,473,473,474,474,475,475,479,479,481,481,483,483,484,484,483,483,482,482,484,484,487,487,488,	706,706,707,707,709,709,712,712,713,713,714,714,716,716,720,720,721,721,722,722,723,723,722,722,721,721,719,719,713,713,712,712,711,711,710,710,711,711,712,712,713,713,710,710,708,708,707,707,706,706,705,705,	/Volumes/Promise RAID 2/Alf/for_Thea/experiments/quantification_test 5_3D9/str_data/PMA/15/3D9_PMA_15image_hoescht163.TIF 3D9_PMA_15image_568162.tif	1750	11,487	0	preAnalysis	none	none	15 PMA	qt_5_3D9_man03	/Volumes/Promise RAID/Alf/for_Thea/experiments/quantification_test 5_3D9/3D9_5
548	328	12,537	15	PMA	685,687,687,688,688,689,689,690,690,691,691,692,692,691,691,690,690,684,684,683,683,677,677,676,676,675,675,674,674,668,668,667,667,666,666,665,665,664,664,665,665,666,666,668,668,673,673,677,677,680,680,681,681,682,682,684,684,685,	717,717,718,718,720,720,721,721,722,722,724,724,729,729,730,730,731,731,732,732,733,733,732,732,733,733,734,734,735,735,734,734,733,733,732,732,729,729,727,727,724,724,723,723,722,722,721,721,722,722,720,720,718,718,717,717,716,716,	/Volumes/Promise RAID 2/Alf/for_Thea/experiments/quantification_test 5_3D9/str_data/PMA/15/3D9_PMA_15image_hoescht163.TIF 3D9_PMA_15image_568162.tif	1750	12,537	0	preAnalysis	none	none	15 PMA	qt_5_3D9_man03	/Volumes/Promise RAID/Alf/for_Thea/experiments/quantification_test 5_3D9/3D9_5
549	347	12,991	15	PMA	1137,1138,1138,1139,1139,1140,1140,1141,1141,1142,1142,1143,1143,1144,1144,1143,1143,1142,1142,1141,1141,1142,1142,1143,1143,1144,1144,1143,1143,1142,1142,1141,1141,1134,1134,1132,1132,1131,1131,1130,1130,1131,1131,1133,1133,1135,1135,1134,1134,1133,1133,1132,1132,1131,1131,1130,1130,1129,1129,1128,1128,1129,1129,1130,1130,1131,1131,1137,	740,740,741,741,742,742,743,743,744,744,746,746,749,749,752,752,754,754,756,756,758,758,760,760,762,762,766,766,767,767,768,768,769,769,768,768,767,767,765,765,759,759,756,756,755,755,754,754,753,753,752,752,751,751,750,750,749,749,747,747,742,742,741,741,740,740,739,739,	/Volumes/Promise RAID 2/Alf/for_Thea/experiments/quantification_test 5_3D9/str_data/PMA/15/3D9_PMA_15image_hoescht163.TIF 3D9_PMA_15image_568162.tif	1750	12,991	0	preAnalysis	none	none	15 PMA	qt_5_3D9_man03	/Volumes/Promise RAID/Alf/for_Thea/experiments/quantification_test 5_3D9/3D9_5
550	307	13,261	15	PMA	1077,1078,1078,1079,1079,1078,1078,1076,1076,1074,1074,1072,1072,1073,1073,1074,1074,1073,1073,1072,1072,1065,1065,1063,1063,1062,1062,1061,1061,1060,1060,1061,1061,1062,1062,1063,1063,1067,1067,1070,1070,1071,1071,1072,1072,1077,	748,748,749,749,756,756,757,757,758,758,759,759,760,760,761,761,768,768,770,770,771,771,770,770,769,769,761,761,759,759,754,754,752,752,751,751,750,750,751,751,750,750,748,748,747,747,	/Volumes/Promise RAID 2/Alf/for_Thea/experiments/quantification_test 5_3D9/str_data/PMA/15/3D9_PMA_15image_hoescht163.TIF 3D9_PMA_15image_568162.tif	1750	13,261	0	preAnalysis	none	none	15 PMA	qt_5_3D9_man03	/Volumes/Promise RAID/Alf/for_Thea/experiments/quantification_test 5_3D9/3D9_5
551	300	13,877	15	PMA	1298,1299,1299,1300,1300,1301,1301,1302,1302,1304,1304,1308,1308,1309,1309,1310,1310,1311,1311,1312,1312,1310,1310,1305,1305,1303,1303,1302,1302,1301,1301,1300,1300,1299,1299,1295,1295,1292,1292,1288,1288,1287,1287,1288,1288,1289,1289,1291,1291,1292,1292,1293,1293,1294,1294,1298,	759,759,760,760,762,762,763,763,764,764,765,765,766,766,767,767,769,769,771,771,779,779,780,780,779,779,778,778,777,777,775,775,774,774,772,772,771,771,770,770,768,768,765,765,763,763,762,762,761,761,760,760,759,759,758,758,	/Volumes/Promise RAID 2/Alf/for_Thea/experiments/quantification_test 5_3D9/str_data/PMA/15/3D9_PMA_15image_hoescht163.TIF 3D9_PMA_15image_568162.tif	1750	13,877	0	preAnalysis	none	none	15 PMA	qt_5_3D9_man03	/Volumes/Promise RAID/Alf/for_Thea/experiments/quantification_test 5_3D9/3D9_5
552	289	8,637	15	PMA	383,384,384,385,385,384,384,385,385,386,386,387,387,389,389,390,390,391,391,392,392,397,397,398,398,399,399,400,400,399,399,398,398,395,395,394,394,391,391,390,390,388,388,387,387,384,384,381,381,379,379,378,378,376,376,375,375,376,376,377,377,376,376,377,377,378,378,383,	760,760,761,761,766,766,769,769,771,771,772,772,773,773,772,772,771,771,770,770,769,769,770,770,771,771,772,772,778,778,779,779,780,780,781,781,780,780,779,779,778,778,777,777,778,778,779,779,778,778,777,777,776,776,774,774,769,769,766,766,765,765,762,762,760,760,759,759,	/Volumes/Promise RAID 2/Alf/for_Thea/experiments/quantification_test 5_3D9/str_data/PMA/15/3D9_PMA_15image_hoescht163.TIF 3D9_PMA_15image_568162.tif	1750	8,637	0	preAnalysis	none	none	15 PMA	qt_5_3D9_man03	/Volumes/Promise RAID/Alf/for_Thea/experiments/quantification_test 5_3D9/3D9_5
553	236	8,678	15	PMA	160,162,162,163,163,164,164,165,165,166,166,165,165,164,164,163,163,162,162,161,161,159,159,157,157,150,150,149,149,148,148,149,149,152,152,155,155,158,158,157,157,156,156,155,155,156,156,157,157,160,	786,786,787,787,788,788,790,790,794,794,799,799,801,801,803,803,804,804,805,805,806,806,807,807,808,808,807,807,806,806,801,801,800,800,799,799,798,798,795,795,793,793,792,792,787,787,786,786,785,785,	/Volumes/Promise RAID 2/Alf/for_Thea/experiments/quantification_test 5_3D9/str_data/PMA/15/3D9_PMA_15image_hoescht163.TIF 3D9_PMA_15image_568162.tif	1750	8,678	0	preAnalysis	none	none	15 PMA	qt_5_3D9_man03	/Volumes/Promise RAID/Alf/for_Thea/experiments/quantification_test 5_3D9/3D9_5
554	337	13,783	15	PMA	831,835,835,836,836,840,840,841,841,842,842,843,843,842,842,841,841,836,836,834,834,835,835,836,836,835,835,834,834,833,833,832,832,829,829,827,827,825,825,824,824,825,825,826,826,827,827,829,829,830,830,829,829,828,828,827,827,826,826,825,825,826,826,827,827,828,828,830,830,831,	818,818,819,819,820,820,821,821,822,822,824,824,831,831,832,832,833,833,834,834,835,835,839,839,841,841,843,843,844,844,845,845,846,846,845,845,844,844,842,842,837,837,835,835,834,834,833,833,832,832,831,831,830,830,829,829,826,826,824,824,822,822,820,820,819,819,818,818,817,817,	/Volumes/Promise RAID 2/Alf/for_Thea/experiments/quantification_test 5_3D9/str_data/PMA/15/3D9_PMA_15image_hoescht163.TIF 3D9_PMA_15image_568162.tif	1750	13,783	0	preAnalysis	none	none	15 PMA	qt_5_3D9_man03	/Volumes/Promise RAID/Alf/for_Thea/experiments/quantification_test 5_3D9/3D9_5
555	255	6,902	15	PMA	319,320,320,321,321,322,322,328,328,329,329,330,330,331,331,330,330,329,329,327,327,325,325,323,323,317,317,315,315,314,314,313,313,312,312,313,313,312,312,311,311,310,310,311,311,313,313,319,	833,833,834,834,836,836,837,837,838,838,839,839,842,842,845,845,846,846,847,847,848,848,849,849,850,850,849,849,848,848,847,847,845,845,844,844,843,843,840,840,837,837,836,836,833,833,832,832,	/Volumes/Promise RAID 2/Alf/for_Thea/experiments/quantification_test 5_3D9/str_data/PMA/15/3D9_PMA_15image_hoescht163.TIF 3D9_PMA_15image_568162.tif	1750	6,902	0	preAnalysis	none	none	15 PMA	qt_5_3D9_man03	/Volumes/Promise RAID/Alf/for_Thea/experiments/quantification_test 5_3D9/3D9_5
556	229	14,424	15	PMA	1238,1240,1240,1241,1241,1242,1242,1243,1243,1244,1244,1245,1245,1246,1246,1245,1245,1244,1244,1243,1243,1238,1238,1237,1237,1236,1236,1235,1235,1234,1234,1233,1233,1232,1232,1230,1230,1229,1229,1228,1228,1229,1229,1231,1231,1238,	842,842,843,843,844,844,846,846,848,848,851,851,854,854,855,855,858,858,859,859,860,860,859,859,858,858,857,857,856,856,855,855,853,853,852,852,851,851,849,849,844,844,842,842,841,841,	/Volumes/Promise RAID 2/Alf/for_Thea/experiments/quantification_test 5_3D9/str_data/PMA/15/3D9_PMA_15image_hoescht163.TIF 3D9_PMA_15image_568162.tif	1750	14,424	0	preAnalysis	none	none	15 PMA	qt_5_3D9_man03	/Volumes/Promise RAID/Alf/for_Thea/experiments/quantification_test 5_3D9/3D9_5
557	256	6,25	15	PMA	420,421,421,422,422,421,421,420,420,419,419,420,420,419,419,418,418,417,417,410,410,409,409,408,408,407,407,406,406,407,407,408,408,409,409,410,410,411,411,412,412,413,413,420,	847,847,848,848,853,853,856,856,857,857,858,858,864,864,865,865,866,866,867,867,866,866,865,865,863,863,861,861,856,856,853,853,851,851,850,850,849,849,848,848,847,847,846,846,	/Volumes/Promise RAID 2/Alf/for_Thea/experiments/quantification_test 5_3D9/str_data/PMA/15/3D9_PMA_15image_hoescht163.TIF 3D9_PMA_15image_568162.tif	1750	6,25	0	preAnalysis	none	none	15 PMA	qt_5_3D9_man03	/Volumes/Promise RAID/Alf/for_Thea/experiments/quantification_test 5_3D9/3D9_5
558	296	11,483	15	PMA	961,964,964,965,965,966,966,967,967,968,968,969,969,970,970,969,969,968,968,966,966,963,963,960,960,954,954,953,953,952,952,951,951,952,952,953,953,954,954,955,955,956,956,957,957,959,959,961,	868,868,869,869,870,870,871,871,873,873,874,874,876,876,881,881,884,884,885,885,886,886,887,887,888,888,887,887,886,886,884,884,877,877,876,876,873,873,871,871,870,870,869,869,868,868,867,867,	/Volumes/Promise RAID 2/Alf/for_Thea/experiments/quantification_test 5_3D9/str_data/PMA/15/3D9_PMA_15image_hoescht163.TIF 3D9_PMA_15image_568162.tif	1750	11,483	0	preAnalysis	none	none	15 PMA	qt_5_3D9_man03	/Volumes/Promise RAID/Alf/for_Thea/experiments/quantification_test 5_3D9/3D9_5
559	354	12,113	15	PMA	1034,1035,1035,1036,1036,1040,1040,1041,1041,1043,1043,1044,1044,1045,1045,1046,1046,1045,1045,1044,1044,1042,1042,1037,1037,1035,1035,1030,1030,1028,1028,1027,1027,1026,1026,1025,1025,1024,1024,1023,1023,1024,1024,1025,1025,1026,1026,1027,1027,1028,1028,1030,1030,1034,	888,888,892,892,893,893,892,892,893,893,894,894,895,895,897,897,901,901,904,904,906,906,907,907,908,908,909,909,908,908,907,907,906,906,905,905,903,903,900,900,894,894,892,892,891,891,890,890,889,889,888,888,887,887,	/Volumes/Promise RAID 2/Alf/for_Thea/experiments/quantification_test 5_3D9/str_data/PMA/15/3D9_PMA_15image_hoescht163.TIF 3D9_PMA_15image_568162.tif	1750	12,113	0	preAnalysis	none	none	15 PMA	qt_5_3D9_man03	/Volumes/Promise RAID/Alf/for_Thea/experiments/quantification_test 5_3D9/3D9_5
560	189	7,534	15	PMA	169,171,171,172,172,173,173,172,172,171,171,170,170,168,168,166,166,161,161,158,158,157,157,156,156,157,157,158,158,160,160,163,163,164,164,165,165,167,167,169,	891,891,892,892,893,893,901,901,903,903,904,904,905,905,906,906,907,907,906,906,905,905,903,903,900,900,899,899,898,898,897,897,894,894,893,893,891,891,890,890,	/Volumes/Promise RAID 2/Alf/for_Thea/experiments/quantification_test 5_3D9/str_data/PMA/15/3D9_PMA_15image_hoescht163.TIF 3D9_PMA_15image_568162.tif	1750	7,534	0	preAnalysis	none	none	15 PMA	qt_5_3D9_man03	/Volumes/Promise RAID/Alf/for_Thea/experiments/quantification_test 5_3D9/3D9_5
561	288	13,382	15	PMA	902,903,903,904,904,905,905,904,904,906,906,907,907,906,906,905,905,904,904,903,903,902,902,900,900,899,899,898,898,897,897,891,891,890,890,889,889,890,890,891,891,892,892,893,893,894,894,895,895,894,894,893,893,894,894,902,	948,948,949,949,951,951,953,953,957,957,959,959,964,964,965,965,966,966,967,967,966,966,967,967,969,969,971,971,972,972,973,973,972,972,971,971,967,967,966,966,965,965,963,963,962,962,960,960,957,957,954,954,951,951,947,947,	/Volumes/Promise RAID 2/Alf/for_Thea/experiments/quantification_test 5_3D9/str_data/PMA/15/3D9_PMA_15image_hoescht163.TIF 3D9_PMA_15image_568162.tif	1750	13,382	0	preAnalysis	none	none	15 PMA	qt_5_3D9_man03	/Volumes/Promise RAID/Alf/for_Thea/experiments/quantification_test 5_3D9/3D9_5
562	250	6,592	15	PMA	348,349,349,350,350,351,351,356,356,358,358,359,359,360,360,359,359,357,357,354,354,351,351,348,348,345,345,343,343,342,342,341,341,340,340,341,341,343,343,348,	959,959,960,960,967,967,968,968,969,969,970,970,971,971,976,976,978,978,979,979,978,978,977,977,976,976,975,975,974,974,972,972,966,966,961,961,959,959,958,958,	/Volumes/Promise RAID 2/Alf/for_Thea/experiments/quantification_test 5_3D9/str_data/PMA/15/3D9_PMA_15image_hoescht163.TIF 3D9_PMA_15image_568162.tif	1750	6,592	0	preAnalysis	none	none	15 PMA	qt_5_3D9_man03	/Volumes/Promise RAID/Alf/for_Thea/experiments/quantification_test 5_3D9/3D9_5
563	199	0	15	PMA	22,26,26,27,27,28,28,27,27,26,26,25,25,24,24,22,22,17,17,14,14,10,10,6,6,5,5,4,4,3,3,4,4,6,6,7,7,9,9,10,10,13,13,16,16,17,17,18,18,19,19,20,20,22,	992,992,993,993,997,997,999,999,1000,1000,1001,1001,1002,1002,1004,1004,1005,1005,1006,1006,1007,1007,1008,1008,1007,1007,1006,1006,1005,1005,1003,1003,1001,1001,1000,1000,1001,1001,1000,1000,1001,1001,1000,1000,999,999,997,997,994,994,992,992,991,991,	/Volumes/Promise RAID 2/Alf/for_Thea/experiments/quantification_test 5_3D9/str_data/PMA/15/3D9_PMA_15image_hoescht163.TIF 3D9_PMA_15image_568162.tif	1750	0	0	preAnalysis	none	none	15 PMA	qt_5_3D9_man03	/Volumes/Promise RAID/Alf/for_Thea/experiments/quantification_test 5_3D9/3D9_5
564	190	6,4	15	PMA	399,405,405,407,407,408,408,409,409,408,408,407,407,406,406,401,401,397,397,395,395,393,393,392,392,393,393,395,395,399,	998,998,999,999,1000,1000,1001,1001,1007,1007,1009,1009,1010,1010,1011,1011,1010,1010,1009,1009,1008,1008,1006,1006,1000,1000,998,998,997,997,	/Volumes/Promise RAID 2/Alf/for_Thea/experiments/quantification_test 5_3D9/str_data/PMA/15/3D9_PMA_15image_hoescht163.TIF 3D9_PMA_15image_568162.tif	1750	6,4	0	preAnalysis	none	none	15 PMA	qt_5_3D9_man03	/Volumes/Promise RAID/Alf/for_Thea/experiments/quantification_test 5_3D9/3D9_5
565	249	3,341	15	PMA	211,216,216,217,217,218,218,219,219,220,220,219,219,218,218,217,217,216,216,214,214,212,212,210,210,209,209,208,208,207,207,206,206,205,205,204,204,203,203,204,204,205,205,207,207,211,	31,31,32,32,33,33,34,34,36,36,40,40,46,46,47,47,48,48,49,49,50,50,49,49,48,48,47,47,46,46,44,44,43,43,42,42,40,40,34,34,32,32,31,31,30,30,	/Volumes/Promise RAID 2/Alf/for_Thea/experiments/quantification_test 5_3D9/str_data/PMA/15/3D9_PMA_15image_hoescht167.TIF 3D9_PMA_15image_568166.tif	1750	3,341	0	preAnalysis	none	none	15 PMA	qt_5_3D9_man03	/Volumes/Promise RAID/Alf/for_Thea/experiments/quantification_test 5_3D9/3D9_5
566	373	8,794	15	PMA	1259,1261,1261,1262,1262,1263,1263,1264,1264,1265,1265,1266,1266,1267,1267,1271,1271,1273,1273,1274,1274,1275,1275,1274,1274,1273,1273,1272,1272,1271,1271,1265,1265,1263,1263,1259,1259,1256,1256,1255,1255,1253,1253,1252,1252,1246,1246,1245,1245,1244,1244,1245,1245,1246,1246,1247,1247,1248,1248,1249,1249,1250,1250,1251,1251,1252,1252,1254,1254,1259,	33,33,34,34,35,35,36,36,37,37,38,38,40,40,41,41,42,42,43,43,45,45,46,46,49,49,50,50,51,51,52,52,51,51,46,46,47,47,48,48,49,49,50,50,51,51,50,50,48,48,45,45,43,43,42,42,41,41,38,38,36,36,35,35,34,34,33,33,32,32,	/Volumes/Promise RAID 2/Alf/for_Thea/experiments/quantification_test 5_3D9/str_data/PMA/15/3D9_PMA_15image_hoescht167.TIF 3D9_PMA_15image_568166.tif	1750	8,794	0	preAnalysis	none	none	15 PMA	qt_5_3D9_man03	/Volumes/Promise RAID/Alf/for_Thea/experiments/quantification_test 5_3D9/3D9_5
567	329	7,635	15	PMA	469,470,470,471,471,472,472,473,473,477,477,479,479,480,480,481,481,480,480,477,477,476,476,475,475,471,471,470,470,469,469,470,470,475,475,474,474,473,473,472,472,469,469,467,467,466,466,465,465,464,464,462,462,460,460,458,458,457,457,456,456,457,457,458,458,459,459,460,460,461,461,462,462,464,464,469,	61,61,62,62,63,63,64,64,66,66,67,67,68,68,69,69,73,73,76,76,77,77,83,83,84,84,83,83,82,82,77,77,76,76,75,75,74,74,73,73,72,72,71,71,73,73,75,75,76,76,77,77,78,78,77,77,76,76,75,75,68,68,66,66,65,65,64,64,63,63,62,62,61,61,60,60,	/Volumes/Promise RAID 2/Alf/for_Thea/experiments/quantification_test 5_3D9/str_data/PMA/15/3D9_PMA_15image_hoescht167.TIF 3D9_PMA_15image_568166.tif	1750	7,635	0	preAnalysis	none	none	15 PMA	qt_5_3D9_man03	/Volumes/Promise RAID/Alf/for_Thea/experiments/quantification_test 5_3D9/3D9_5
568	368	9,348	15	PMA	1254,1256,1256,1257,1257,1256,1256,1257,1257,1258,1258,1259,1259,1258,1258,1257,1257,1255,1255,1254,1254,1247,1247,1242,1242,1241,1241,1240,1240,1241,1241,1242,1242,1243,1243,1244,1244,1245,1245,1244,1244,1245,1245,1246,1246,1247,1247,1248,1248,1250,1250,1254,	64,64,66,66,73,73,76,76,77,77,79,79,84,84,87,87,88,88,89,89,90,90,91,91,90,90,89,89,85,85,83,83,82,82,80,80,77,77,75,75,69,69,67,67,66,66,65,65,64,64,63,63,	/Volumes/Promise RAID 2/Alf/for_Thea/experiments/quantification_test 5_3D9/str_data/PMA/15/3D9_PMA_15image_hoescht167.TIF 3D9_PMA_15image_568166.tif	1750	9,348	0	preAnalysis	none	none	15 PMA	qt_5_3D9_man03	/Volumes/Promise RAID/Alf/for_Thea/experiments/quantification_test 5_3D9/3D9_5
569	350	10,763	15	PMA	710,713,713,715,715,717,717,718,718,719,719,718,718,717,717,716,716,713,713,710,710,709,709,710,710,711,711,710,710,709,709,707,707,706,706,704,704,702,702,701,701,700,700,699,699,698,698,699,699,700,700,701,701,702,702,703,703,705,705,708,708,710,	99,99,100,100,101,101,102,102,104,104,109,109,110,110,111,111,112,112,111,111,112,112,117,117,118,118,123,123,124,124,125,125,126,126,125,125,124,124,123,123,122,122,120,120,118,118,110,110,109,109,107,107,104,104,102,102,100,100,99,99,98,98,	/Volumes/Promise RAID 2/Alf/for_Thea/experiments/quantification_test 5_3D9/str_data/PMA/15/3D9_PMA_15image_hoescht167.TIF 3D9_PMA_15image_568166.tif	1750	10,763	0	preAnalysis	none	none	15 PMA	qt_5_3D9_man03	/Volumes/Promise RAID/Alf/for_Thea/experiments/quantification_test 5_3D9/3D9_5
570	244	5,574	15	PMA	124,126,126,127,127,128,128,127,127,126,126,125,125,124,124,123,123,120,120,114,114,113,113,112,112,111,111,110,110,111,111,112,112,113,113,114,114,115,115,116,116,117,117,120,120,124,	138,138,139,139,142,142,146,146,147,147,148,148,149,149,155,155,156,156,157,157,156,156,155,155,154,154,152,152,151,151,148,148,147,147,143,143,141,141,140,140,139,139,138,138,137,137,	/Volumes/Promise RAID 2/Alf/for_Thea/experiments/quantification_test 5_3D9/str_data/PMA/15/3D9_PMA_15image_hoescht167.TIF 3D9_PMA_15image_568166.tif	1750	5,574	0	preAnalysis	none	none	15 PMA	qt_5_3D9_man03	/Volumes/Promise RAID/Alf/for_Thea/experiments/quantification_test 5_3D9/3D9_5
571	340	11,106	15	PMA	355,356,356,357,357,358,358,362,362,363,363,364,364,365,365,366,366,367,367,366,366,365,365,362,362,360,360,356,356,355,355,354,354,352,352,349,349,347,347,345,345,344,344,343,343,342,342,343,343,344,344,345,345,350,350,351,351,355,	141,141,142,142,146,146,148,148,149,149,150,150,153,153,154,154,155,155,161,161,162,162,163,163,162,162,163,163,162,162,161,161,158,158,159,159,158,158,157,157,156,156,155,155,153,153,150,150,148,148,147,147,146,146,141,141,140,140,	/Volumes/Promise RAID 2/Alf/for_Thea/experiments/quantification_test 5_3D9/str_data/PMA/15/3D9_PMA_15image_hoescht167.TIF 3D9_PMA_15image_568166.tif	1750	11,106	0	preAnalysis	none	none	15 PMA	qt_5_3D9_man03	/Volumes/Promise RAID/Alf/for_Thea/experiments/quantification_test 5_3D9/3D9_5
572	377	10,61	15	PMA	801,803,803,804,804,806,806,811,811,812,812,813,813,814,814,813,813,812,812,811,811,810,810,809,809,808,808,807,807,806,806,805,805,804,804,803,803,800,800,798,798,795,795,794,794,793,793,794,794,795,795,796,796,795,795,794,794,795,795,796,796,797,797,799,799,801,	144,144,145,145,147,147,146,146,147,147,148,148,150,150,154,154,156,156,158,158,159,159,160,160,161,161,162,162,163,163,166,166,167,167,168,168,169,169,170,170,169,169,168,168,166,166,161,161,159,159,158,158,155,155,154,154,149,149,146,146,145,145,144,144,143,143,	/Volumes/Promise RAID 2/Alf/for_Thea/experiments/quantification_test 5_3D9/str_data/PMA/15/3D9_PMA_15image_hoescht167.TIF 3D9_PMA_15image_568166.tif	1750	10,61	0	preAnalysis	none	none	15 PMA	qt_5_3D9_man03	/Volumes/Promise RAID/Alf/for_Thea/experiments/quantification_test 5_3D9/3D9_5
573	431	11,916	15	PMA	1182,1185,1185,1186,1186,1187,1187,1188,1188,1190,1190,1191,1191,1192,1192,1191,1191,1190,1190,1189,1189,1188,1188,1187,1187,1186,1186,1184,1184,1182,1182,1176,1176,1175,1175,1176,1176,1177,1177,1178,1178,1179,1179,1180,1180,1181,1181,1180,1180,1179,1179,1177,1177,1172,1172,1170,1170,1169,1169,1168,1168,1169,1169,1170,1170,1172,1172,1173,1173,1175,1175,1178,1178,1182,	165,165,166,166,167,167,169,169,171,171,172,172,173,173,179,179,185,185,187,187,189,189,191,191,192,192,193,193,194,194,195,195,194,194,191,191,189,189,188,188,186,186,184,184,181,181,177,177,176,176,177,177,178,178,177,177,176,176,174,174,172,172,170,170,168,168,167,167,166,166,165,165,164,164,	/Volumes/Promise RAID 2/Alf/for_Thea/experiments/quantification_test 5_3D9/str_data/PMA/15/3D9_PMA_15image_hoescht167.TIF 3D9_PMA_15image_568166.tif	1750	11,916	0	preAnalysis	none	none	15 PMA	qt_5_3D9_man03	/Volumes/Promise RAID/Alf/for_Thea/experiments/quantification_test 5_3D9/3D9_5
574	429	9,883	15	PMA	1339,1341,1341,1343,1343,1344,1344,1345,1345,1351,1351,1352,1352,1353,1353,1354,1354,1353,1353,1352,1352,1351,1351,1349,1349,1348,1348,1346,1346,1343,1343,1338,1338,1336,1336,1335,1335,1334,1334,1332,1332,1331,1331,1330,1330,1329,1329,1330,1330,1331,1331,1330,1330,1329,1329,1330,1330,1331,1331,1332,1332,1333,1333,1339,	165,165,166,166,167,167,169,169,174,174,175,175,176,176,178,178,181,181,183,183,184,184,185,185,186,186,187,187,188,188,189,189,188,188,187,187,186,186,185,185,184,184,183,183,182,182,178,178,177,177,176,176,174,174,168,168,167,167,166,166,165,165,164,164,	/Volumes/Promise RAID 2/Alf/for_Thea/experiments/quantification_test 5_3D9/str_data/PMA/15/3D9_PMA_15image_hoescht167.TIF 3D9_PMA_15image_568166.tif	1750	9,883	0	preAnalysis	none	none	15 PMA	qt_5_3D9_man03	/Volumes/Promise RAID/Alf/for_Thea/experiments/quantification_test 5_3D9/3D9_5
575	306	8,261	15	PMA	492,493,493,494,494,495,495,496,496,497,497,505,505,507,507,508,508,509,509,508,508,507,507,505,505,501,501,499,499,497,497,495,495,494,494,493,493,492,492,491,491,490,490,488,488,487,487,486,486,485,485,486,486,487,487,488,488,492,	185,185,186,186,187,187,189,189,195,195,198,198,199,199,200,200,202,202,205,205,207,207,208,208,209,209,210,210,209,209,208,208,207,207,206,206,205,205,203,203,202,202,200,200,198,198,196,196,193,193,189,189,186,186,185,185,184,184,	/Volumes/Promise RAID 2/Alf/for_Thea/experiments/quantification_test 5_3D9/str_data/PMA/15/3D9_PMA_15image_hoescht167.TIF 3D9_PMA_15image_568166.tif	1750	8,261	0	preAnalysis	none	none	15 PMA	qt_5_3D9_man03	/Volumes/Promise RAID/Alf/for_Thea/experiments/quantification_test 5_3D9/3D9_5
576	374	10,652	15	PMA	816,817,817,818,818,819,819,818,818,819,819,818,818,820,820,821,821,822,822,821,821,819,819,818,818,812,812,810,810,806,806,804,804,803,803,802,802,801,801,800,800,801,801,802,802,804,804,805,805,806,806,807,807,809,809,816,	212,212,213,213,217,217,218,218,219,219,220,220,221,221,222,222,223,223,230,230,232,232,233,233,234,234,233,233,232,232,231,231,230,230,228,228,227,227,224,224,220,220,217,217,216,216,215,215,214,214,213,213,212,212,211,211,	/Volumes/Promise RAID 2/Alf/for_Thea/experiments/quantification_test 5_3D9/str_data/PMA/15/3D9_PMA_15image_hoescht167.TIF 3D9_PMA_15image_568166.tif	1750	10,652	0	preAnalysis	none	none	15 PMA	qt_5_3D9_man03	/Volumes/Promise RAID/Alf/for_Thea/experiments/quantification_test 5_3D9/3D9_5
577	349	11,507	15	PMA	1072,1073,1073,1074,1074,1078,1078,1079,1079,1080,1080,1081,1081,1082,1082,1083,1083,1084,1084,1083,1083,1082,1082,1081,1081,1079,1079,1073,1073,1071,1071,1070,1070,1069,1069,1068,1068,1067,1067,1066,1066,1065,1065,1064,1064,1063,1063,1064,1064,1065,1065,1066,1066,1068,1068,1071,1071,1072,	218,218,217,217,218,218,219,219,220,220,226,226,229,229,230,230,233,233,236,236,238,238,239,239,240,240,241,241,240,240,239,239,238,238,237,237,236,236,231,231,230,230,229,229,227,227,223,223,221,221,220,220,219,219,218,218,217,217,	/Volumes/Promise RAID 2/Alf/for_Thea/experiments/quantification_test 5_3D9/str_data/PMA/15/3D9_PMA_15image_hoescht167.TIF 3D9_PMA_15image_568166.tif	1750	11,507	0	preAnalysis	none	none	15 PMA	qt_5_3D9_man03	/Volumes/Promise RAID/Alf/for_Thea/experiments/quantification_test 5_3D9/3D9_5
578	343	9,376	15	PMA	1136,1137,1137,1138,1138,1139,1139,1140,1140,1141,1141,1142,1142,1143,1143,1142,1142,1141,1141,1139,1139,1137,1137,1135,1135,1134,1134,1132,1132,1127,1127,1125,1125,1124,1124,1123,1123,1122,1122,1123,1123,1124,1124,1125,1125,1126,1126,1127,1127,1128,1128,1129,1129,1131,1131,1136,	221,221,222,222,223,223,224,224,225,225,226,226,229,229,235,235,236,236,238,238,239,239,240,240,241,241,242,242,243,243,242,242,241,241,240,240,238,238,233,233,231,231,230,230,228,228,225,225,224,224,222,222,221,221,220,220,	/Volumes/Promise RAID 2/Alf/for_Thea/experiments/quantification_test 5_3D9/str_data/PMA/15/3D9_PMA_15image_hoescht167.TIF 3D9_PMA_15image_568166.tif	1750	9,376	0	preAnalysis	none	none	15 PMA	qt_5_3D9_man03	/Volumes/Promise RAID/Alf/for_Thea/experiments/quantification_test 5_3D9/3D9_5
579	408	12,451	15	PMA	1017,1019,1019,1020,1020,1021,1021,1022,1022,1024,1024,1025,1025,1026,1026,1027,1027,1028,1028,1029,1029,1033,1033,1034,1034,1035,1035,1036,1036,1035,1035,1034,1034,1033,1033,1032,1032,1031,1031,1029,1029,1028,1028,1027,1027,1026,1026,1023,1023,1019,1019,1016,1016,1015,1015,1014,1014,1013,1013,1012,1012,1011,1011,1010,1010,1011,1011,1012,1012,1014,1014,1017,	291,291,293,293,294,294,295,295,297,297,295,295,294,294,293,293,292,292,291,291,290,290,291,291,292,292,294,294,298,298,300,300,302,302,304,304,305,305,307,307,308,308,309,309,310,310,311,311,312,312,311,311,310,310,309,309,308,308,307,307,306,306,302,302,294,294,292,292,291,291,290,290,	/Volumes/Promise RAID 2/Alf/for_Thea/experiments/quantification_test 5_3D9/str_data/PMA/15/3D9_PMA_15image_hoescht167.TIF 3D9_PMA_15image_568166.tif	1750	12,451	0	preAnalysis	none	none	15 PMA	qt_5_3D9_man03	/Volumes/Promise RAID/Alf/for_Thea/experiments/quantification_test 5_3D9/3D9_5
580	369	13,718	15	PMA	769,772,772,774,774,775,775,776,776,778,778,779,779,780,780,781,781,780,780,779,779,778,778,777,777,776,776,771,771,769,769,768,768,767,767,768,768,763,763,762,762,761,761,760,760,761,761,762,762,764,764,766,766,769,	303,303,304,304,305,305,306,306,307,307,308,308,310,310,311,311,322,322,325,325,326,326,327,327,328,328,329,329,328,328,327,327,325,325,320,320,315,315,314,314,313,313,311,311,308,308,306,306,304,304,303,303,302,302,	/Volumes/Promise RAID 2/Alf/for_Thea/experiments/quantification_test 5_3D9/str_data/PMA/15/3D9_PMA_15image_hoescht167.TIF 3D9_PMA_15image_568166.tif	1750	13,718	0	preAnalysis	none	none	15 PMA	qt_5_3D9_man03	/Volumes/Promise RAID/Alf/for_Thea/experiments/quantification_test 5_3D9/3D9_5
581	261	9,011	15	PMA	139,141,141,142,142,143,143,144,144,145,145,146,146,147,147,146,146,142,142,141,141,138,138,137,137,139,139,140,140,141,141,143,143,144,144,145,145,144,144,143,143,137,137,135,135,134,134,133,133,132,132,131,131,130,130,129,129,128,128,129,129,130,130,132,132,134,134,136,136,139,	308,308,309,309,310,310,311,311,312,312,313,313,314,314,317,317,318,318,317,317,315,315,316,316,318,318,319,319,320,320,321,321,322,322,324,324,325,325,328,328,329,329,328,328,327,327,325,325,323,323,322,322,321,321,320,320,319,319,312,312,311,311,310,310,309,309,308,308,307,307,	/Volumes/Promise RAID 2/Alf/for_Thea/experiments/quantification_test 5_3D9/str_data/PMA/15/3D9_PMA_15image_hoescht167.TIF 3D9_PMA_15image_568166.tif	1750	9,011	0	preAnalysis	none	none	15 PMA	qt_5_3D9_man03	/Volumes/Promise RAID/Alf/for_Thea/experiments/quantification_test 5_3D9/3D9_5
582	360	13,778	15	PMA	1244,1246,1246,1248,1248,1253,1253,1255,1255,1256,1256,1257,1257,1258,1258,1257,1257,1255,1255,1254,1254,1252,1252,1242,1242,1240,1240,1239,1239,1238,1238,1237,1237,1236,1236,1235,1235,1234,1234,1233,1233,1232,1232,1233,1233,1234,1234,1235,1235,1237,1237,1244,	319,319,321,321,322,322,323,323,324,324,325,325,327,327,331,331,334,334,335,335,336,336,337,337,336,336,335,335,334,334,333,333,332,332,331,331,330,330,329,329,328,328,323,323,321,321,320,320,319,319,318,318,	/Volumes/Promise RAID 2/Alf/for_Thea/experiments/quantification_test 5_3D9/str_data/PMA/15/3D9_PMA_15image_hoescht167.TIF 3D9_PMA_15image_568166.tif	1750	13,778	0	preAnalysis	none	none	15 PMA	qt_5_3D9_man03	/Volumes/Promise RAID/Alf/for_Thea/experiments/quantification_test 5_3D9/3D9_5
583	345	11,893	15	PMA	697,699,699,700,700,701,701,702,702,704,704,706,706,707,707,711,711,712,712,713,713,712,712,711,711,709,709,707,707,700,700,699,699,698,698,697,697,696,696,695,695,694,694,693,693,692,692,691,691,690,690,689,689,690,690,691,691,692,692,697,	335,335,337,337,338,338,340,340,344,344,345,345,344,344,345,345,346,346,347,347,353,353,354,354,356,356,357,357,358,358,357,357,356,356,355,355,353,353,352,352,351,351,350,350,349,349,348,348,347,347,346,346,337,337,336,336,335,335,334,334,	/Volumes/Promise RAID 2/Alf/for_Thea/experiments/quantification_test 5_3D9/str_data/PMA/15/3D9_PMA_15image_hoescht167.TIF 3D9_PMA_15image_568166.tif	1750	11,893	0	preAnalysis	none	none	15 PMA	qt_5_3D9_man03	/Volumes/Promise RAID/Alf/for_Thea/experiments/quantification_test 5_3D9/3D9_5
584	333	12,033	15	PMA	555,558,558,559,559,560,560,559,559,558,558,559,559,561,561,564,564,566,566,567,567,569,569,570,570,571,571,570,570,569,569,568,568,562,562,560,560,558,558,557,557,551,551,550,550,549,549,548,548,547,547,546,546,547,547,548,548,549,549,550,550,551,551,553,553,555,	342,342,343,343,345,345,348,348,351,351,352,352,353,353,352,352,351,351,350,350,351,351,352,352,353,353,358,358,359,359,360,360,361,361,360,360,361,361,362,362,363,363,362,362,360,360,356,356,355,355,354,354,347,347,346,346,345,345,344,344,343,343,342,342,341,341,	/Volumes/Promise RAID 2/Alf/for_Thea/experiments/quantification_test 5_3D9/str_data/PMA/15/3D9_PMA_15image_hoescht167.TIF 3D9_PMA_15image_568166.tif	1750	12,033	0	preAnalysis	none	none	15 PMA	qt_5_3D9_man03	/Volumes/Promise RAID/Alf/for_Thea/experiments/quantification_test 5_3D9/3D9_5
[truncated: 2,836 more rows]
