# Supplementary figures and images for: Histone H3 clipping is a novel signature of human neutrophil extracellular traps
Source: eLife journal article supplement (doi:10.7554/elife.68283), 2022-10-25

blot 20.10.15

21.10.15 TT

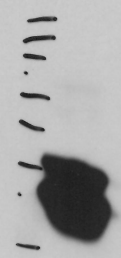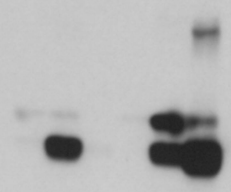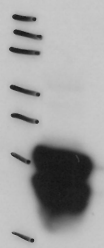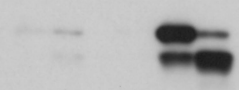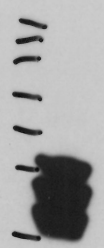

Supplement: fig2-data1 [file elife-68283-fig2-data1-v2.zip]

6hr 20.10.15

$\alpha$  H4 - C

22.10.15

71

30  
25  
20  
15  
10

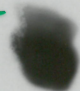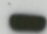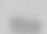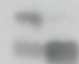

30  
25  
20  
15  
10

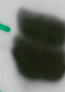

H4-C

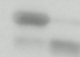

Remaining signal from H3-C probe

PMA 90 min  
stimulation

30  
25  
20  
15  
10

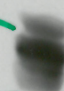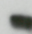

Supplement: fig2-data1 [file elife-68283-fig2-data1-v2.zip]

blot 20.10.15

21.10.15 TT

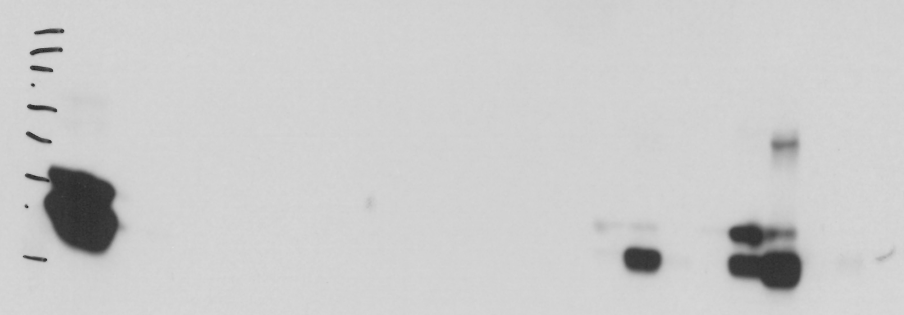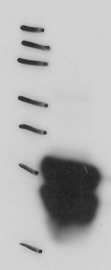

PMA 90 min  
stimulation

H3 fractions (H3C)

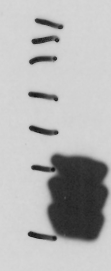

Supplement: fig2-data1 [file elife-68283-fig2-data1-v2.zip]

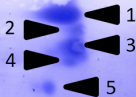

Supplement: fig2-data3 [file Figure 2-Source Data 5-Related to Figure 2B_annotated.pdf › Figure 2-Source Data 5-Related to Figure 2B_annotated.pdf]

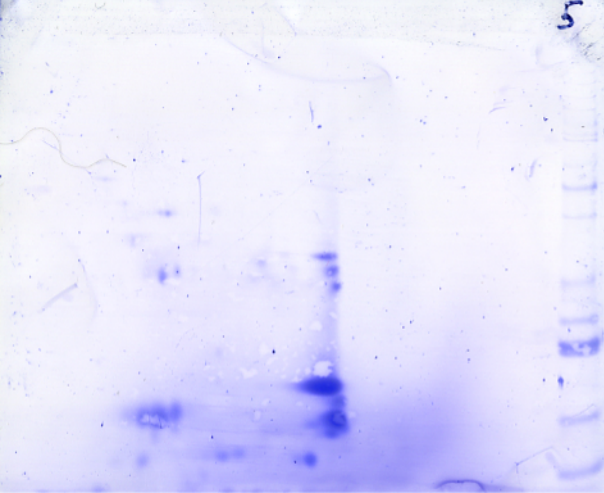

Supplement: fig2-data3 [file Figure 2-Source Data 5-Related to Figure 2B_original.pdf › Figure 2-Source Data 5-Related to Figure 2B_original.pdf]
